# Supplementary material
Source: publisher figshare collection journal article supplement (https://acs.figshare.com/ndownloader/files/8028845)
Supplement: Supplementary file 1 [file 8028845]

data_shelx
_publ_section_title              
'Growth and optical properties of LixNa1-xBa12(BO3)7F4 fluoride borates with "anti-zeolite" structure'
_publ_section_abstract           
'Studied LixNa1-xBa12(BO3)7F4 (P42bc) solid solution belongs to the new class of "anti-zeolite" borates with [Ba12(BO3)6]6+ cation pattern which contains channels filled by anionic clusters. Optical-quality crystals were grown from compositions with different sodium-lithium ratio. The results of Rietveld refinement based on powder data demonstrates linear increase of parameter a and unit cell volume with Na / (Na + Li) ratio in cation site. Parameter c is less sensitive to changes in stoichiometry, which is consistent with channel topology of LixNa1-xBa12(BO3)7F4 structure. Distinctive feature of LixNa1-xBa12(BO3)7F4 crystals is their deep purple color which is due to both hole-type and electron-type centers. Crystals are characterized by linear dichroism effect.'
_publ_requested_journal          Inorg.Chem.
_publ_contact_author_name        'Sergey V. Rashchenko'
_publ_contact_author_address     '3 Koptyg Avenue, 630090 Novosibirsk, Russia'
_publ_contact_author_email       rashchenko@igm.nsc.ru
_publ_contact_author_phone       +7(383)3332406
loop_
_publ_author_name
_publ_author_address
'Rashchenko, Sergey V.' '3 Koptyg Avenue, 630090 Novosibirsk, Russia'

_audit_creation_method           SHELXL-2016/6
_chemical_name_systematic        'barium lithium fluoride borate'
_chemical_formula_sum            'B7 Ba12 F4 Li O21'
_chemical_formula_weight         2142.69

loop_
_atom_type_symbol
_atom_type_description
_atom_type_scat_dispersion_real
_atom_type_scat_dispersion_imag
_atom_type_scat_source
Li Li -0.0003 0.0001 'International Tables Vol C Tables 4.2.6.8 and 6.1.1.4'
B B 0.0013 0.0007 'International Tables Vol C Tables 4.2.6.8 and 6.1.1.4'
O O 0.0106 0.0060 'International Tables Vol C Tables 4.2.6.8 and 6.1.1.4'
F F 0.0171 0.0103 'International Tables Vol C Tables 4.2.6.8 and 6.1.1.4'
Ba Ba -0.3244 2.2819 'International Tables Vol C Tables 4.2.6.8 and 6.1.1.4'

_space_group_crystal_system      tetragonal
_space_group_IT_number           106
_space_group_name_H-M_alt        'P 42 b c'
_space_group_name_Hall           'P 4c -2ab'

_shelx_space_group_comment       
;
The symmetry employed for this shelxl refinement is uniquely defined
by the following loop, which should always be used as a source of
symmetry information in preference to the above space-group names.
They are only intended as comments.
;

loop_
_space_group_symop_operation_xyz
'x, y, z'
'-x, -y, z'
'-y, x, z+1/2'
'y, -x, z+1/2'
'x+1/2, -y+1/2, z'
'-x+1/2, y+1/2, z'
'-y+1/2, -x+1/2, z+1/2'
'y+1/2, x+1/2, z+1/2'

_cell_length_a                   13.53491(8)
_cell_length_b                   13.53491(8)
_cell_length_c                   14.93849(16)
_cell_angle_alpha                90
_cell_angle_beta                 90
_cell_angle_gamma                90
_cell_volume                     2736.64(4)
_cell_formula_units_Z            4
_cell_measurement_temperature    293(2)
_cell_measurement_reflns_used    51008
_cell_measurement_theta_min      1.9900
_cell_measurement_theta_max      32.2130

_exptl_crystal_description       grain
_exptl_crystal_colour            pinkish
_exptl_crystal_density_diffrn    5.201
_exptl_crystal_F_000             3656
_exptl_crystal_size_max          0.1
_exptl_crystal_size_mid          0.1
_exptl_crystal_size_min          0.1
_exptl_absorpt_coefficient_mu    17.063
_exptl_absorpt_correction_type   empirical
_exptl_absorpt_correction_T_min  0.29594
_exptl_absorpt_correction_T_max  0.31727
_exptl_absorpt_process_details   
;
CrysAlisPro 1.171.38.43 (Rigaku Oxford Diffraction, 2015)
Spherical absorption correction
 using 0.05 mm equivalent radius and absorption coefficient.
Empirical absorption correction using spherical harmonics,
 implemented in SCALE3 ABSPACK scaling algorithm.
;
_diffrn_ambient_temperature      293(2)
_diffrn_radiation_wavelength     0.71073
_diffrn_radiation_type           MoK\a
_diffrn_source                   'sealed X-ray tube'
_diffrn_measurement_device_type  'STOE IPDS-2T'
_diffrn_measurement_method       '\w scans'
_diffrn_reflns_number            128621
_diffrn_reflns_av_unetI/netI     0.0160
_diffrn_reflns_av_R_equivalents  0.0679
_diffrn_reflns_limit_h_min       -20
_diffrn_reflns_limit_h_max       20
_diffrn_reflns_limit_k_min       -20
_diffrn_reflns_limit_k_max       20
_diffrn_reflns_limit_l_min       -22
_diffrn_reflns_limit_l_max       22
_diffrn_reflns_theta_min         2.128
_diffrn_reflns_theta_max         32.345
_diffrn_reflns_theta_full        25.242
_diffrn_measured_fraction_theta_max 0.999
_diffrn_measured_fraction_theta_full 1.000
_diffrn_reflns_Laue_measured_fraction_max 0.999
_diffrn_reflns_Laue_measured_fraction_full 1.000
_diffrn_reflns_point_group_measured_fraction_max 0.998
_diffrn_reflns_point_group_measured_fraction_full 1.000
_reflns_number_total             4900
_reflns_number_gt                4830
_reflns_threshold_expression     'I > 2\s(I)'
_reflns_Friedel_coverage         0.931
_reflns_Friedel_fraction_max     0.997
_reflns_Friedel_fraction_full    0.999

_reflns_special_details          
;
 Reflections were merged by SHELXL according to the crystal
 class for the calculation of statistics and refinement.
 
 _reflns_Friedel_fraction is defined as the number of unique
 Friedel pairs measured divided by the number that would be
 possible theoretically, ignoring centric projections and
 systematic absences.
;

_computing_data_collection       'CrysAlisPro 1.171.38.43 (Rigaku OD, 2015)'
_computing_cell_refinement       'CrysAlisPro 1.171.38.43 (Rigaku OD, 2015)'
_computing_data_reduction        'CrysAlisPro 1.171.38.43 (Rigaku OD, 2015)'
_computing_structure_solution    'SHELXS-2013/1 (Sheldrick, 2013)'
_computing_structure_refinement  'SHELXL-2016/6 (Sheldrick, 2016)'
_refine_ls_structure_factor_coef Fsqd
_refine_ls_matrix_type           full
_refine_ls_weighting_scheme      calc
_refine_ls_weighting_details     
'w=1/[\s^2^(Fo^2^)+(0.0145P)^2^+33.3422P] where P=(Fo^2^+2Fc^2^)/3'
_atom_sites_solution_hydrogens   .
_refine_ls_hydrogen_treatment    undef
_refine_ls_extinction_method     'SHELXL-2016/6 (Sheldrick 2016)'
_refine_ls_extinction_coef       0.00281(5)
_refine_ls_extinction_expression Fc^*^=kFc[1+0.001xFc^2^\l^3^/sin(2\q)]^-1/4^
_refine_ls_abs_structure_details 
;
 Flack x determined using 2072 quotients [(I+)-(I-)]/[(I+)+(I-)]
 (Parsons, Flack and Wagner, Acta Cryst. B69 (2013) 249-259).
;
_refine_ls_abs_structure_Flack   0.50(3)
_refine_ls_number_reflns         4900
_refine_ls_number_parameters     179
_refine_ls_number_restraints     1
_refine_ls_R_factor_all          0.0308
_refine_ls_R_factor_gt           0.0300
_refine_ls_wR_factor_ref         0.0629
_refine_ls_wR_factor_gt          0.0624
_refine_ls_goodness_of_fit_ref   1.222
_refine_ls_restrained_S_all      1.222
_refine_ls_shift/su_max          0.000
_refine_ls_shift/su_mean         0.000

loop_
_atom_site_label
_atom_site_type_symbol
_atom_site_fract_x
_atom_site_fract_y
_atom_site_fract_z
_atom_site_U_iso_or_equiv
_atom_site_adp_type
_atom_site_occupancy
_atom_site_site_symmetry_order
_atom_site_calc_flag
_atom_site_refinement_flags_posn
_atom_site_refinement_flags_adp
_atom_site_refinement_flags_occupancy
_atom_site_disorder_assembly
_atom_site_disorder_group
Ba1 Ba 0.30006(6) 0.06370(7) 0.44950(4) 0.01119(16) Uani 1 1 d . . . . .
Ba2 Ba 0.57669(7) 0.20226(6) 0.44939(4) 0.01242(17) Uani 1 1 d . . . . .
Ba3 Ba 0.000000 0.000000 0.45017(9) 0.0144(2) Uani 1 2 d S T P . .
Ba4 Ba 0.29827(5) 0.06323(7) 0.18380(4) 0.01083(17) Uani 1 1 d . . . . .
Ba5 Ba 0.29510(6) -0.07812(6) 0.68108(4) 0.01173(17) Uani 1 1 d . . . . .
Ba6 Ba 0.16844(3) -0.18061(3) 0.31558(12) 0.01066(9) Uani 1 1 d . . . . .
Ba7 Ba 0.000000 0.000000 0.18348(9) 0.0157(3) Uani 1 2 d S T P . .
B1 B 0.1699(14) 0.1512(14) 0.6052(12) 0.015(3) Uani 1 1 d . . . . .
O1 O 0.2543(9) 0.1104(9) 0.6368(9) 0.020(2) Uani 1 1 d . . . . .
O2 O 0.1273(9) 0.1182(9) 0.5249(9) 0.017(3) Uani 1 1 d . . . . .
O3 O 0.6227(9) 0.2726(11) 0.6449(9) 0.030(3) Uani 1 1 d . . . . .
B2 B 0.1234(5) 0.1177(5) 0.3138(15) 0.0072(12) Uiso 1 1 d . . . . .
O4 O 0.5250(4) 0.3537(4) 0.3171(11) 0.0139(11) Uani 1 1 d . . . . .
O5 O 0.1459(4) 0.0192(4) 0.3154(11) 0.0141(10) Uani 1 1 d . . . . .
O6 O 0.1973(4) 0.1877(4) 0.3217(8) 0.0126(12) Uiso 1 1 d . . . . .
B3 B 0.3425(12) 0.3326(11) 0.5318(12) 0.007(3) Uiso 1 1 d . . . . .
O7 O 0.3876(10) 0.2496(9) 0.4934(8) 0.020(2) Uiso 1 1 d . . . . .
O8 O 0.2347(8) -0.1247(9) 0.4820(8) 0.017(2) Uani 1 1 d . . . . .
O9 O -0.1180(9) 0.1262(9) 0.6071(10) 0.016(2) Uiso 1 1 d . . . . .
BC1 B 0.500000 0.000000 0.5475(9) 0.014(3) Uani 1 2 d S T P . .
OC1 O 0.500000 0.000000 0.4559(7) 0.0171(19) Uani 1 2 d S T P . .
OC2 O 0.4524(6) -0.0742(6) 0.5910(6) 0.0251(17) Uani 1 1 d . . . . .
Li1 Li 0.500000 0.000000 0.302(2) 0.021(6) Uiso 1 2 d S . P . .
F1 F 0.4326(4) 0.1297(4) 0.3178(10) 0.0268(13) Uani 1 1 d . . . . .
F2 F 0.3604(4) -0.0749(3) 0.3161(9) 0.0194(10) Uani 1 1 d . . . . .

loop_
_atom_site_aniso_label
_atom_site_aniso_U_11
_atom_site_aniso_U_22
_atom_site_aniso_U_33
_atom_site_aniso_U_23
_atom_site_aniso_U_13
_atom_site_aniso_U_12
Ba1 0.0106(3) 0.0122(3) 0.0108(4) 0.0012(4) -0.0017(3) 0.0003(3)
Ba2 0.0119(4) 0.0114(3) 0.0140(4) 0.0001(3) 0.0024(4) 0.0012(3)
Ba3 0.0148(5) 0.0197(5) 0.0086(6) 0.000 0.000 -0.0086(5)
Ba4 0.0108(3) 0.0110(3) 0.0107(4) 0.0015(5) -0.0007(3) 0.0001(3)
Ba5 0.0116(3) 0.0113(3) 0.0122(4) -0.0010(4) -0.0004(3) 0.0013(3)
Ba6 0.00937(16) 0.01042(17) 0.01217(17) -0.0010(5) -0.0004(4) 0.00250(12)
Ba7 0.0239(6) 0.0129(5) 0.0104(6) 0.000 0.000 -0.0059(5)
B1 0.021(6) 0.018(6) 0.007(5) 0.009(4) -0.003(4) -0.002(4)
O1 0.017(4) 0.016(4) 0.026(4) 0.003(3) -0.009(3) 0.009(3)
O2 0.017(4) 0.019(4) 0.016(4) -0.011(3) -0.007(3) 0.010(3)
O3 0.015(5) 0.048(8) 0.027(6) 0.019(5) -0.006(4) -0.012(5)
O4 0.010(2) 0.012(2) 0.020(3) -0.013(5) 0.003(5) -0.0020(17)
O5 0.014(2) 0.009(2) 0.020(3) 0.006(5) -0.007(5) 0.0003(17)
O8 0.012(4) 0.025(5) 0.013(4) 0.003(4) 0.005(3) -0.003(4)
BC1 0.011(6) 0.013(6) 0.017(9) 0.000 0.000 0.004(4)
OC1 0.022(5) 0.018(5) 0.011(4) 0.000 0.000 0.000(4)
OC2 0.021(4) 0.019(4) 0.035(5) 0.007(3) 0.002(3) -0.002(3)
F1 0.021(2) 0.025(3) 0.035(3) -0.015(5) -0.001(6) -0.002(2)
F2 0.022(2) 0.018(2) 0.018(2) 0.000(5) 0.009(5) 0.0035(17)

_geom_special_details            
;
 All esds (except the esd in the dihedral angle between two l.s. planes)
 are estimated using the full covariance matrix.  The cell esds are taken
 into account individually in the estimation of esds in distances, angles
 and torsion angles; correlations between esds in cell parameters are only
 used when they are defined by crystal symmetry.  An approximate (isotropic)
 treatment of cell esds is used for estimating esds involving l.s. planes.
;

loop_
_geom_bond_atom_site_label_1
_geom_bond_atom_site_label_2
_geom_bond_distance
_geom_bond_site_symmetry_2
_geom_bond_publ_flag
Ba1 O2 2.698(12) . ?
Ba1 O8 2.743(12) . ?
Ba1 F1 2.808(12) . ?
Ba1 OC1 2.8418(9) . ?
Ba1 F2 2.856(10) . ?
Ba1 O7 2.857(12) . ?
Ba1 O6 2.897(9) . ?
Ba1 O1 2.935(14) . ?
Ba1 O5 2.955(12) . ?
Ba1 B1 3.15(2) . ?
Ba1 BC1 3.195(6) . ?
Ba1 B2 3.219(15) . ?
Ba2 O7 2.719(14) . ?
Ba2 OC2 2.763(10) 2_655 ?
Ba2 O2 2.766(12) 5 ?
Ba2 F2 2.768(11) 2_655 ?
Ba2 O8 2.802(11) 2_655 ?
Ba2 O6 2.919(9) 5 ?
Ba2 OC1 2.9294(9) . ?
Ba2 O4 2.932(13) . ?
Ba2 F1 2.938(10) . ?
Ba2 O3 3.135(15) . ?
Ba2 B2 3.231(15) 5 ?
Ba2 BC1 3.274(6) . ?
Ba3 O2 2.602(13) . ?
Ba3 O2 2.602(13) 2 ?
Ba3 O4 2.826(11) 6_545 ?
Ba3 O4 2.826(11) 5_455 ?
Ba3 O5 2.832(13) . ?
Ba3 O5 2.832(13) 2 ?
Ba3 B2 3.078(16) 2 ?
Ba3 B2 3.078(16) . ?
Ba3 O9 3.311(13) . ?
Ba3 O9 3.311(13) 2 ?
Ba3 B3 3.341(17) 6_545 ?
Ba3 B3 3.341(17) 5_455 ?
Ba4 OC2 2.674(8) 8_544 ?
Ba4 O9 2.700(12) 4_554 ?
Ba4 O3 2.755(12) 7_554 ?
Ba4 F2 2.848(10) . ?
Ba4 O1 2.849(13) 7_554 ?
Ba4 F1 2.850(11) . ?
Ba4 O5 2.911(13) . ?
Ba4 O6 2.991(9) . ?
Ba4 O7 2.992(13) 7_554 ?
Ba4 B2 3.149(15) . ?
Ba4 B3 3.150(17) 7_554 ?
Ba4 Li1 3.364(15) . ?
Ba5 OC2 2.519(9) . ?
Ba5 O1 2.693(12) . ?
Ba5 O9 2.718(12) 2 ?
Ba5 F2 2.803(10) 8_545 ?
Ba5 O3 2.909(15) 2_655 ?
Ba5 O4 2.950(10) 7 ?
Ba5 F1 3.015(12) 7 ?
Ba5 O6 3.022(9) 4 ?
Ba5 B3 3.147(16) 6_545 ?
Ba5 O8 3.148(12) . ?
Ba5 B2 3.173(15) 4 ?
Ba5 Li1 3.476(15) 7 ?
Ba6 O6 2.547(5) 6_545 ?
Ba6 O4 2.659(5) 6_545 ?
Ba6 O5 2.721(5) . ?
Ba6 O8 2.750(12) . ?
Ba6 O3 2.783(14) 7_554 ?
Ba6 F1 2.910(6) 6_545 ?
Ba6 O7 2.919(13) 6_545 ?
Ba6 O1 2.957(14) 4_554 ?
Ba6 F2 2.967(5) . ?
Ba6 B1 3.154(18) 4_554 ?
Ba6 B3 3.238(18) 6_545 ?
Ba6 Ba7 3.8817(12) . ?
Ba7 O9 2.602(13) 3_554 ?
Ba7 O9 2.602(14) 4_554 ?
Ba7 O5 2.802(12) 2 ?
Ba7 O5 2.802(12) . ?
Ba7 O4 2.832(13) 5_455 ?
Ba7 O4 2.832(13) 6_545 ?
Ba7 B2 3.019(16) . ?
Ba7 B2 3.019(16) 2 ?
Ba7 B1 3.293(19) 4_554 ?
Ba7 B1 3.293(19) 3_554 ?
B1 O3 1.35(2) 5_455 ?
B1 O1 1.35(2) . ?
B1 O2 1.40(2) . ?
B2 O5 1.368(8) . ?
B2 O6 1.383(9) . ?
B2 O4 1.387(8) 5_455 ?
B3 O9 1.36(2) 5 ?
B3 O7 1.400(19) . ?
B3 O8 1.407(19) 6 ?
BC1 OC2 1.359(10) . ?
BC1 OC2 1.359(10) 2_655 ?
BC1 OC1 1.368(17) . ?
OC1 Li1 2.30(3) . ?
Li1 F1 1.992(7) . ?
Li1 F1 1.992(7) 2_655 ?
Li1 F2 2.154(6) . ?
Li1 F2 2.154(6) 2_655 ?

loop_
_geom_angle_atom_site_label_1
_geom_angle_atom_site_label_2
_geom_angle_atom_site_label_3
_geom_angle
_geom_angle_site_symmetry_1
_geom_angle_site_symmetry_3
_geom_angle_publ_flag
O2 Ba1 O8 84.3(4) . . ?
O2 Ba1 F1 139.4(3) . . ?
O8 Ba1 F1 128.7(3) . . ?
O2 Ba1 OC1 153.4(4) . . ?
O8 Ba1 OC1 91.1(2) . . ?
F1 Ba1 OC1 60.8(2) . . ?
O2 Ba1 F2 135.9(3) . . ?
O8 Ba1 F2 66.7(3) . . ?
F1 Ba1 F2 62.4(2) . . ?
OC1 Ba1 F2 63.4(2) . . ?
O2 Ba1 O7 91.3(4) . . ?
O8 Ba1 O7 155.8(4) . . ?
F1 Ba1 O7 67.4(3) . . ?
OC1 Ba1 O7 82.2(3) . . ?
F2 Ba1 O7 128.3(3) . . ?
O2 Ba1 O6 72.6(3) . . ?
O8 Ba1 O6 120.0(3) . . ?
F1 Ba1 O6 70.2(2) . . ?
OC1 Ba1 O6 130.9(2) . . ?
F2 Ba1 O6 93.3(3) . . ?
O7 Ba1 O6 80.8(3) . . ?
O2 Ba1 O1 50.2(4) . . ?
O8 Ba1 O1 87.9(4) . . ?
F1 Ba1 O1 137.2(3) . . ?
OC1 Ba1 O1 103.5(3) . . ?
F2 Ba1 O1 150.1(3) . . ?
O7 Ba1 O1 71.3(3) . . ?
O6 Ba1 O1 113.7(3) . . ?
O2 Ba1 O5 74.1(4) . . ?
O8 Ba1 O5 72.7(3) . . ?
F1 Ba1 O5 92.4(4) . . ?
OC1 Ba1 O5 129.3(3) . . ?
F2 Ba1 O5 66.1(3) . . ?
O7 Ba1 O5 128.9(3) . . ?
O6 Ba1 O5 48.13(17) . . ?
O1 Ba1 O5 122.8(3) . . ?
O2 Ba1 B1 26.4(4) . . ?
O8 Ba1 B1 92.2(4) . . ?
F1 Ba1 B1 139.1(4) . . ?
OC1 Ba1 B1 128.5(4) . . ?
F2 Ba1 B1 157.3(4) . . ?
O7 Ba1 B1 74.4(5) . . ?
O6 Ba1 B1 90.0(4) . . ?
O1 Ba1 B1 25.4(4) . . ?
O5 Ba1 B1 100.5(4) . . ?
O2 Ba1 BC1 128.1(4) . . ?
O8 Ba1 BC1 86.6(2) . . ?
F1 Ba1 BC1 82.3(3) . . ?
OC1 Ba1 BC1 25.3(3) . . ?
F2 Ba1 BC1 84.3(3) . . ?
O7 Ba1 BC1 77.4(3) . . ?
O6 Ba1 BC1 149.85(18) . . ?
O1 Ba1 BC1 78.5(3) . . ?
O5 Ba1 BC1 148.61(19) . . ?
B1 Ba1 BC1 103.7(4) . . ?
O2 Ba1 B2 63.7(4) . . ?
O8 Ba1 B2 94.8(3) . . ?
F1 Ba1 B2 87.8(4) . . ?
OC1 Ba1 B2 142.9(4) . . ?
F2 Ba1 B2 85.5(4) . . ?
O7 Ba1 B2 104.6(3) . . ?
O6 Ba1 B2 25.45(18) . . ?
O1 Ba1 B2 113.3(4) . . ?
O5 Ba1 B2 25.14(18) . . ?
B1 Ba1 B2 87.9(4) . . ?
BC1 Ba1 B2 168.2(4) . . ?
O7 Ba2 OC2 80.1(3) . 2_655 ?
O7 Ba2 O2 85.8(4) . 5 ?
OC2 Ba2 O2 105.9(3) 2_655 5 ?
O7 Ba2 F2 127.6(3) . 2_655 ?
OC2 Ba2 F2 101.8(3) 2_655 2_655 ?
O2 Ba2 F2 139.9(3) 5 2_655 ?
O7 Ba2 O8 154.6(4) . 2_655 ?
OC2 Ba2 O8 76.2(3) 2_655 2_655 ?
O2 Ba2 O8 91.9(4) 5 2_655 ?
F2 Ba2 O8 67.2(3) 2_655 2_655 ?
O7 Ba2 O6 124.3(3) . 5 ?
OC2 Ba2 O6 154.1(2) 2_655 5 ?
O2 Ba2 O6 71.3(3) 5 5 ?
F2 Ba2 O6 71.1(2) 2_655 5 ?
O8 Ba2 O6 78.2(3) 2_655 5 ?
O7 Ba2 OC1 83.0(3) . . ?
OC2 Ba2 OC1 48.5(3) 2_655 . ?
O2 Ba2 OC1 153.6(3) 5 . ?
F2 Ba2 OC1 63.3(2) 2_655 . ?
O8 Ba2 OC1 88.1(3) 2_655 . ?
O6 Ba2 OC1 134.2(2) 5 . ?
O7 Ba2 O4 76.9(3) . . ?
OC2 Ba2 O4 157.0(2) 2_655 . ?
O2 Ba2 O4 73.7(3) 5 . ?
F2 Ba2 O4 91.4(3) 2_655 . ?
O8 Ba2 O4 126.6(3) 2_655 . ?
O6 Ba2 O4 48.42(18) 5 . ?
OC1 Ba2 O4 126.2(2) . . ?
O7 Ba2 F1 67.4(3) . . ?
OC2 Ba2 F1 102.0(3) 2_655 . ?
O2 Ba2 F1 137.0(3) 5 . ?
F2 Ba2 F1 61.0(2) 2_655 . ?
O8 Ba2 F1 126.6(3) 2_655 . ?
O6 Ba2 F1 96.0(3) 5 . ?
OC1 Ba2 F1 58.3(2) . . ?
O4 Ba2 F1 67.9(3) . . ?
O7 Ba2 O3 83.7(4) . . ?
OC2 Ba2 O3 60.4(3) 2_655 . ?
O2 Ba2 O3 45.9(4) 5 . ?
F2 Ba2 O3 143.0(3) 2_655 . ?
O8 Ba2 O3 76.7(3) 2_655 . ?
O6 Ba2 O3 110.0(3) 5 . ?
OC1 Ba2 O3 108.9(3) . . ?
O4 Ba2 O3 117.6(3) . . ?
F1 Ba2 O3 149.0(3) . . ?
O7 Ba2 B2 99.1(3) . 5 ?
OC2 Ba2 B2 168.8(4) 2_655 5 ?
O2 Ba2 B2 62.9(4) 5 5 ?
F2 Ba2 B2 87.6(4) 2_655 5 ?
O8 Ba2 B2 102.3(3) 2_655 5 ?
O6 Ba2 B2 25.34(18) 5 5 ?
OC1 Ba2 B2 142.6(4) . 5 ?
O4 Ba2 B2 25.42(18) . 5 ?
F1 Ba2 B2 87.9(4) . 5 ?
O3 Ba2 B2 108.4(4) . 5 ?
O7 Ba2 BC1 77.9(3) . . ?
OC2 Ba2 BC1 24.2(3) 2_655 . ?
O2 Ba2 BC1 129.1(3) 5 . ?
F2 Ba2 BC1 84.2(3) 2_655 . ?
O8 Ba2 BC1 84.1(3) 2_655 . ?
O6 Ba2 BC1 153.69(19) 5 . ?
OC1 Ba2 BC1 24.7(3) . . ?
O4 Ba2 BC1 144.16(17) . . ?
F1 Ba2 BC1 79.0(3) . . ?
O3 Ba2 BC1 84.3(3) . . ?
B2 Ba2 BC1 166.7(4) 5 . ?
O2 Ba3 O2 129.2(6) . 2 ?
O2 Ba3 O4 144.3(3) . 6_545 ?
O2 Ba3 O4 78.0(4) 2 6_545 ?
O2 Ba3 O4 78.0(4) . 5_455 ?
O2 Ba3 O4 144.3(3) 2 5_455 ?
O4 Ba3 O4 90.6(5) 6_545 5_455 ?
O2 Ba3 O5 77.7(4) . . ?
O2 Ba3 O5 145.4(3) 2 . ?
O4 Ba3 O5 69.4(3) 6_545 . ?
O4 Ba3 O5 49.6(2) 5_455 . ?
O2 Ba3 O5 145.4(3) . 2 ?
O2 Ba3 O5 77.7(4) 2 2 ?
O4 Ba3 O5 49.6(2) 6_545 2 ?
O4 Ba3 O5 69.4(3) 5_455 2 ?
O5 Ba3 O5 89.4(5) . 2 ?
O2 Ba3 B2 163.9(5) . 2 ?
O2 Ba3 B2 66.8(4) 2 2 ?
O4 Ba3 B2 26.74(19) 6_545 2 ?
O4 Ba3 B2 87.8(4) 5_455 2 ?
O5 Ba3 B2 87.4(4) . 2 ?
O5 Ba3 B2 26.3(2) 2 2 ?
O2 Ba3 B2 66.8(4) . . ?
O2 Ba3 B2 163.9(5) 2 . ?
O4 Ba3 B2 87.8(4) 6_545 . ?
O4 Ba3 B2 26.74(19) 5_455 . ?
O5 Ba3 B2 26.3(2) . . ?
O5 Ba3 B2 87.4(4) 2 . ?
B2 Ba3 B2 97.1(7) 2 . ?
O2 Ba3 O9 72.5(4) . . ?
O2 Ba3 O9 72.2(4) 2 . ?
O4 Ba3 O9 143.3(2) 6_545 . ?
O4 Ba3 O9 101.2(3) 5_455 . ?
O5 Ba3 O9 142.4(2) . . ?
O5 Ba3 O9 102.4(3) 2 . ?
B2 Ba3 O9 118.3(3) 2 . ?
B2 Ba3 O9 117.6(3) . . ?
O2 Ba3 O9 72.2(4) . 2 ?
O2 Ba3 O9 72.5(4) 2 2 ?
O4 Ba3 O9 101.2(3) 6_545 2 ?
O4 Ba3 O9 143.3(2) 5_455 2 ?
O5 Ba3 O9 102.4(3) . 2 ?
O5 Ba3 O9 142.4(2) 2 2 ?
B2 Ba3 O9 117.6(3) 2 2 ?
B2 Ba3 O9 118.3(3) . 2 ?
O9 Ba3 O9 89.9(5) . 2 ?
O2 Ba3 B3 80.7(3) . 6_545 ?
O2 Ba3 B3 81.3(3) 2 6_545 ?
O4 Ba3 B3 81.8(3) 6_545 6_545 ?
O4 Ba3 B3 130.9(3) 5_455 6_545 ?
O5 Ba3 B3 82.9(3) . 6_545 ?
O5 Ba3 B3 129.9(3) 2 6_545 ?
B2 Ba3 B3 103.7(3) 2 6_545 ?
B2 Ba3 B3 104.3(3) . 6_545 ?
O9 Ba3 B3 113.5(4) . 6_545 ?
O9 Ba3 B3 23.7(4) 2 6_545 ?
O2 Ba3 B3 81.3(3) . 5_455 ?
O2 Ba3 B3 80.7(3) 2 5_455 ?
O4 Ba3 B3 130.9(3) 6_545 5_455 ?
O4 Ba3 B3 81.8(3) 5_455 5_455 ?
O5 Ba3 B3 129.9(3) . 5_455 ?
O5 Ba3 B3 82.9(3) 2 5_455 ?
B2 Ba3 B3 104.3(3) 2 5_455 ?
B2 Ba3 B3 103.7(3) . 5_455 ?
O9 Ba3 B3 23.7(4) . 5_455 ?
O9 Ba3 B3 113.5(4) 2 5_455 ?
B3 Ba3 B3 137.2(6) 6_545 5_455 ?
OC2 Ba4 O9 119.4(4) 8_544 4_554 ?
OC2 Ba4 O3 66.6(4) 8_544 7_554 ?
O9 Ba4 O3 82.0(4) 4_554 7_554 ?
OC2 Ba4 F2 78.5(3) 8_544 . ?
O9 Ba4 F2 136.9(3) 4_554 . ?
O3 Ba4 F2 69.5(3) 7_554 . ?
OC2 Ba4 O1 94.5(3) 8_544 7_554 ?
O9 Ba4 O1 91.8(4) 4_554 7_554 ?
O3 Ba4 O1 153.0(5) 7_554 7_554 ?
F2 Ba4 O1 127.7(3) . 7_554 ?
OC2 Ba4 F1 97.4(3) 8_544 . ?
O9 Ba4 F1 139.6(3) 4_554 . ?
O3 Ba4 F1 131.2(3) 7_554 . ?
F2 Ba4 F1 62.0(3) . . ?
O1 Ba4 F1 67.8(3) 7_554 . ?
OC2 Ba4 O5 133.8(2) 8_544 . ?
O9 Ba4 O5 74.4(4) 4_554 . ?
O3 Ba4 O5 73.0(4) 7_554 . ?
F2 Ba4 O5 66.8(2) . . ?
O1 Ba4 O5 130.6(3) 7_554 . ?
F1 Ba4 O5 92.4(4) . . ?
OC2 Ba4 O6 165.4(3) 8_544 . ?
O9 Ba4 O6 75.1(3) 4_554 . ?
O3 Ba4 O6 120.0(4) 7_554 . ?
F2 Ba4 O6 91.5(3) . . ?
O1 Ba4 O6 83.1(3) 7_554 . ?
F1 Ba4 O6 68.3(2) . . ?
O5 Ba4 O6 47.67(19) . . ?
OC2 Ba4 O7 76.8(3) 8_544 7_554 ?
O9 Ba4 O7 49.3(4) 4_554 7_554 ?
O3 Ba4 O7 85.8(4) 7_554 7_554 ?
F2 Ba4 O7 150.5(3) . 7_554 ?
O1 Ba4 O7 70.5(3) 7_554 7_554 ?
F1 Ba4 O7 137.4(3) . 7_554 ?
O5 Ba4 O7 122.3(3) . 7_554 ?
O6 Ba4 O7 115.5(3) . 7_554 ?
OC2 Ba4 B2 159.4(2) 8_544 . ?
O9 Ba4 B2 63.2(4) 4_554 . ?
O3 Ba4 B2 94.7(4) 7_554 . ?
F2 Ba4 B2 87.0(3) . . ?
O1 Ba4 B2 106.0(3) 7_554 . ?
F1 Ba4 B2 88.4(4) . . ?
O5 Ba4 B2 25.71(19) . . ?
O6 Ba4 B2 25.9(2) . . ?
O7 Ba4 B2 111.8(4) 7_554 . ?
OC2 Ba4 B3 102.5(4) 8_544 7_554 ?
O9 Ba4 B3 25.5(4) 4_554 7_554 ?
O3 Ba4 B3 91.3(4) 7_554 7_554 ?
F2 Ba4 B3 158.8(3) . 7_554 ?
O1 Ba4 B3 73.5(4) 7_554 7_554 ?
F1 Ba4 B3 137.5(3) . 7_554 ?
O5 Ba4 B3 99.9(4) . 7_554 ?
O6 Ba4 B3 90.7(4) . 7_554 ?
O7 Ba4 B3 26.2(4) 7_554 7_554 ?
B2 Ba4 B3 85.8(4) . 7_554 ?
OC2 Ba4 Li1 66.8(4) 8_544 . ?
O9 Ba4 Li1 173.4(5) 4_554 . ?
O3 Ba4 Li1 99.3(3) 7_554 . ?
F2 Ba4 Li1 39.5(2) . . ?
O1 Ba4 Li1 89.9(3) 7_554 . ?
F1 Ba4 Li1 36.2(3) . . ?
O5 Ba4 Li1 99.7(5) . . ?
O6 Ba4 Li1 98.7(4) . . ?
O7 Ba4 Li1 137.1(5) 7_554 . ?
B2 Ba4 Li1 110.2(6) . . ?
B3 Ba4 Li1 159.8(4) 7_554 . ?
OC2 Ba5 O1 91.3(3) . . ?
OC2 Ba5 O9 122.2(4) . 2 ?
O1 Ba5 O9 86.9(3) . 2 ?
OC2 Ba5 F2 82.0(3) . 8_545 ?
O1 Ba5 F2 125.9(3) . 8_545 ?
O9 Ba5 F2 140.8(3) 2 8_545 ?
OC2 Ba5 O3 66.2(3) . 2_655 ?
O1 Ba5 O3 152.9(5) . 2_655 ?
O9 Ba5 O3 92.6(4) 2 2_655 ?
F2 Ba5 O3 68.0(3) 8_545 2_655 ?
OC2 Ba5 O4 160.0(3) . 7 ?
O1 Ba5 O4 78.4(3) . 7 ?
O9 Ba5 O4 74.7(4) 2 7 ?
F2 Ba5 O4 90.3(4) 8_545 7 ?
O3 Ba5 O4 127.6(3) 2_655 7 ?
OC2 Ba5 F1 93.6(3) . 7 ?
O1 Ba5 F1 67.5(3) . 7 ?
O9 Ba5 F1 136.9(3) 2 7 ?
F2 Ba5 F1 59.6(3) 8_545 7 ?
O3 Ba5 F1 126.0(3) 2_655 7 ?
O4 Ba5 F1 66.7(2) 7 7 ?
OC2 Ba5 O6 142.1(2) . 4 ?
O1 Ba5 O6 125.3(3) . 4 ?
O9 Ba5 O6 74.4(3) 2 4 ?
F2 Ba5 O6 69.1(2) 8_545 4 ?
O3 Ba5 O6 80.2(3) 2_655 4 ?
O4 Ba5 O6 47.37(18) 7 4 ?
F1 Ba5 O6 92.3(3) 7 4 ?
OC2 Ba5 B3 97.4(4) . 6_545 ?
O1 Ba5 B3 93.9(4) . 6_545 ?
O9 Ba5 B3 25.6(4) 2 6_545 ?
F2 Ba5 B3 140.1(3) 8_545 6_545 ?
O3 Ba5 B3 75.4(4) 2_655 6_545 ?
O4 Ba5 B3 100.2(4) 7 6_545 ?
F1 Ba5 B3 158.6(3) 7 6_545 ?
O6 Ba5 B3 90.2(4) 4 6_545 ?
OC2 Ba5 O8 73.7(3) . . ?
O1 Ba5 O8 84.5(4) . . ?
O9 Ba5 O8 48.6(4) 2 . ?
F2 Ba5 O8 141.6(3) 8_545 . ?
O3 Ba5 O8 75.1(3) 2_655 . ?
O4 Ba5 O8 121.5(3) 7 . ?
F1 Ba5 O8 149.2(3) 7 . ?
O6 Ba5 O8 115.1(3) 4 . ?
B3 Ba5 O8 25.8(4) 6_545 . ?
OC2 Ba5 B2 167.7(3) . 4 ?
O1 Ba5 B2 100.4(3) . 4 ?
O9 Ba5 B2 62.7(4) 2 4 ?
F2 Ba5 B2 88.2(4) 8_545 4 ?
O3 Ba5 B2 103.3(3) 2_655 4 ?
O4 Ba5 B2 25.86(19) 7 4 ?
F1 Ba5 B2 87.6(3) 7 4 ?
O6 Ba5 B2 25.7(2) 4 4 ?
B3 Ba5 B2 85.5(4) 6_545 4 ?
O8 Ba5 B2 110.8(4) . 4 ?
OC2 Ba5 Li1 66.3(4) . 7 ?
O1 Ba5 Li1 90.2(3) . 7 ?
O9 Ba5 Li1 171.1(5) 2 7 ?
F2 Ba5 Li1 38.3(3) 8_545 7 ?
O3 Ba5 Li1 93.8(3) 2_655 7 ?
O4 Ba5 Li1 96.4(4) 7 7 ?
F1 Ba5 Li1 34.8(2) 7 7 ?
O6 Ba5 Li1 100.6(4) 4 7 ?
B3 Ba5 Li1 163.3(5) 6_545 7 ?
O8 Ba5 Li1 139.4(5) . 7 ?
B2 Ba5 Li1 109.7(5) 4 7 ?
O6 Ba6 O4 145.51(17) 6_545 6_545 ?
O6 Ba6 O5 140.86(16) 6_545 . ?
O4 Ba6 O5 73.50(16) 6_545 . ?
O6 Ba6 O8 85.8(3) 6_545 . ?
O4 Ba6 O8 105.4(4) 6_545 . ?
O5 Ba6 O8 76.4(4) . . ?
O6 Ba6 O3 91.5(4) 6_545 7_554 ?
O4 Ba6 O3 103.9(5) 6_545 7_554 ?
O5 Ba6 O3 75.6(4) . 7_554 ?
O8 Ba6 O3 131.1(2) . 7_554 ?
O6 Ba6 F1 73.56(16) 6_545 6_545 ?
O4 Ba6 F1 72.02(16) 6_545 6_545 ?
O5 Ba6 F1 145.51(15) . 6_545 ?
O8 Ba6 F1 112.7(4) . 6_545 ?
O3 Ba6 F1 113.2(4) 7_554 6_545 ?
O6 Ba6 O7 85.8(4) 6_545 6_545 ?
O4 Ba6 O7 78.1(4) 6_545 6_545 ?
O5 Ba6 O7 107.0(4) . 6_545 ?
O8 Ba6 O7 49.5(4) . 6_545 ?
O3 Ba6 O7 177.1(4) 7_554 6_545 ?
F1 Ba6 O7 65.3(4) 6_545 6_545 ?
O6 Ba6 O1 89.2(4) 6_545 4_554 ?
O4 Ba6 O1 78.8(4) 6_545 4_554 ?
O5 Ba6 O1 107.7(4) . 4_554 ?
O8 Ba6 O1 175.0(3) . 4_554 ?
O3 Ba6 O1 49.0(4) 7_554 4_554 ?
F1 Ba6 O1 65.7(4) 6_545 4_554 ?
O7 Ba6 O1 130.06(17) 6_545 4_554 ?
O6 Ba6 F2 73.31(15) 6_545 . ?
O4 Ba6 F2 141.09(14) 6_545 . ?
O5 Ba6 F2 67.60(14) . . ?
O8 Ba6 F2 65.1(3) . . ?
O3 Ba6 F2 67.4(4) 7_554 . ?
F1 Ba6 F2 146.87(14) 6_545 . ?
O7 Ba6 F2 112.4(4) 6_545 . ?
O1 Ba6 F2 113.5(3) 4_554 . ?
O6 Ba6 B1 96.9(4) 6_545 4_554 ?
O4 Ba6 B1 85.9(5) 6_545 4_554 ?
O5 Ba6 B1 86.8(5) . 4_554 ?
O8 Ba6 B1 155.8(4) . 4_554 ?
O3 Ba6 B1 25.3(4) 7_554 4_554 ?
F1 Ba6 B1 91.0(4) 6_545 4_554 ?
O7 Ba6 B1 154.5(4) 6_545 4_554 ?
O1 Ba6 B1 25.4(4) 4_554 4_554 ?
F2 Ba6 B1 92.6(4) . 4_554 ?
O6 Ba6 B3 92.0(4) 6_545 6_545 ?
O4 Ba6 B3 86.4(5) 6_545 6_545 ?
O5 Ba6 B3 86.6(5) . 6_545 ?
O8 Ba6 B3 25.6(3) . 6_545 ?
O3 Ba6 B3 155.6(4) 7_554 6_545 ?
F1 Ba6 B3 90.9(4) 6_545 6_545 ?
O7 Ba6 B3 25.6(4) 6_545 6_545 ?
O1 Ba6 B3 155.1(3) 4_554 6_545 ?
F2 Ba6 B3 90.6(4) . 6_545 ?
B1 Ba6 B3 171.0(2) 4_554 6_545 ?
O6 Ba6 Ba7 151.4(3) 6_545 . ?
O4 Ba6 Ba7 46.8(3) 6_545 . ?
O5 Ba6 Ba7 46.2(3) . . ?
O8 Ba6 Ba7 118.6(2) . . ?
O3 Ba6 Ba7 61.7(3) 7_554 . ?
F1 Ba6 Ba7 106.60(19) 6_545 . ?
O7 Ba6 Ba7 120.9(2) 6_545 . ?
O1 Ba6 Ba7 66.3(2) 4_554 . ?
F2 Ba6 Ba7 102.25(16) . . ?
B1 Ba6 Ba7 54.6(4) 4_554 . ?
B3 Ba6 Ba7 116.4(3) 6_545 . ?
O9 Ba7 O9 128.0(6) 3_554 4_554 ?
O9 Ba7 O5 77.8(4) 3_554 2 ?
O9 Ba7 O5 145.9(3) 4_554 2 ?
O9 Ba7 O5 145.9(3) 3_554 . ?
O9 Ba7 O5 77.8(4) 4_554 . ?
O5 Ba7 O5 90.6(5) 2 . ?
O9 Ba7 O4 144.8(3) 3_554 5_455 ?
O9 Ba7 O4 78.5(3) 4_554 5_455 ?
O5 Ba7 O4 69.7(3) 2 5_455 ?
O5 Ba7 O4 49.8(2) . 5_455 ?
O9 Ba7 O4 78.5(3) 3_554 6_545 ?
O9 Ba7 O4 144.8(3) 4_554 6_545 ?
O5 Ba7 O4 49.8(2) 2 6_545 ?
O5 Ba7 O4 69.7(3) . 6_545 ?
O4 Ba7 O4 90.4(4) 5_455 6_545 ?
O9 Ba7 B2 165.9(5) 3_554 . ?
O9 Ba7 B2 66.2(4) 4_554 . ?
O5 Ba7 B2 89.1(4) 2 . ?
O5 Ba7 B2 26.9(2) . . ?
O4 Ba7 B2 27.2(2) 5_455 . ?
O4 Ba7 B2 88.9(4) 6_545 . ?
O9 Ba7 B2 66.2(4) 3_554 2 ?
O9 Ba7 B2 165.9(5) 4_554 2 ?
O5 Ba7 B2 26.9(2) 2 2 ?
O5 Ba7 B2 89.1(4) . 2 ?
O4 Ba7 B2 88.9(4) 5_455 2 ?
O4 Ba7 B2 27.2(2) 6_545 2 ?
B2 Ba7 B2 99.7(7) . 2 ?
O9 Ba7 B1 79.8(4) 3_554 4_554 ?
O9 Ba7 B1 82.2(4) 4_554 4_554 ?
O5 Ba7 B1 128.5(3) 2 4_554 ?
O5 Ba7 B1 82.9(4) . 4_554 ?
O4 Ba7 B1 131.6(4) 5_455 4_554 ?
O4 Ba7 B1 80.6(3) 6_545 4_554 ?
B2 Ba7 B1 104.7(4) . 4_554 ?
B2 Ba7 B1 101.8(3) 2 4_554 ?
O9 Ba7 B1 82.2(4) 3_554 3_554 ?
O9 Ba7 B1 79.8(4) 4_554 3_554 ?
O5 Ba7 B1 82.9(4) 2 3_554 ?
O5 Ba7 B1 128.5(3) . 3_554 ?
O4 Ba7 B1 80.6(3) 5_455 3_554 ?
O4 Ba7 B1 131.6(4) 6_545 3_554 ?
B2 Ba7 B1 101.8(3) . 3_554 ?
B2 Ba7 B1 104.7(4) 2 3_554 ?
B1 Ba7 B1 138.4(7) 4_554 3_554 ?
O9 Ba7 Ba3 64.0(3) 3_554 3_554 ?
O9 Ba7 Ba3 64.0(3) 4_554 3_554 ?
O5 Ba7 Ba3 134.7(3) 2 3_554 ?
O5 Ba7 Ba3 134.7(3) . 3_554 ?
O4 Ba7 Ba3 134.8(2) 5_455 3_554 ?
O4 Ba7 Ba3 134.8(2) 6_545 3_554 ?
B2 Ba7 Ba3 130.1(3) . 3_554 ?
B2 Ba7 Ba3 130.1(3) 2 3_554 ?
B1 Ba7 Ba3 69.2(3) 4_554 3_554 ?
B1 Ba7 Ba3 69.2(3) 3_554 3_554 ?
O9 Ba7 Ba6 102.8(2) 3_554 . ?
O9 Ba7 Ba6 103.0(2) 4_554 . ?
O5 Ba7 Ba6 89.9(2) 2 . ?
O5 Ba7 Ba6 44.50(10) . . ?
O4 Ba7 Ba6 90.68(18) 5_455 . ?
O4 Ba7 Ba6 43.24(10) 6_545 . ?
B2 Ba7 Ba6 71.32(19) . . ?
B2 Ba7 Ba6 70.41(19) 2 . ?
B1 Ba7 Ba6 51.4(3) 4_554 . ?
B1 Ba7 Ba6 170.2(3) 3_554 . ?
Ba3 Ba7 Ba6 120.56(3) 3_554 . ?
O3 B1 O1 123.9(17) 5_455 . ?
O3 B1 O2 115.1(14) 5_455 . ?
O1 B1 O2 120.9(16) . . ?
O3 B1 Ba1 151.2(12) 5_455 . ?
O1 B1 Ba1 68.4(10) . . ?
O2 B1 Ba1 58.6(8) . . ?
O3 B1 Ba6 61.8(9) 5_455 3 ?
O1 B1 Ba6 69.2(9) . 3 ?
O2 B1 Ba6 153.3(12) . 3 ?
Ba1 B1 Ba6 137.5(6) . 3 ?
O3 B1 Ba7 89.3(11) 5_455 3 ?
O1 B1 Ba7 102.3(10) . 3 ?
O2 B1 Ba7 79.6(10) . 3 ?
Ba1 B1 Ba7 114.8(6) . 3 ?
Ba6 B1 Ba7 74.0(4) 3 3 ?
O3 B1 Ba2 70.8(9) 5_455 5_455 ?
O1 B1 Ba2 144.2(12) . 5_455 ?
O2 B1 Ba2 55.5(7) . 5_455 ?
Ba1 B1 Ba2 85.4(4) . 5_455 ?
Ba6 B1 Ba2 132.4(6) 3 5_455 ?
Ba7 B1 Ba2 110.9(5) 3 5_455 ?
B1 O1 Ba5 130.1(11) . . ?
B1 O1 Ba4 129.8(11) . 7 ?
Ba5 O1 Ba4 100.0(4) . 7 ?
B1 O1 Ba1 86.2(10) . . ?
Ba5 O1 Ba1 89.2(4) . . ?
Ba4 O1 Ba1 98.4(4) 7 . ?
B1 O1 Ba6 85.5(10) . 3 ?
Ba5 O1 Ba6 95.7(4) . 3 ?
Ba4 O1 Ba6 87.4(4) 7 3 ?
Ba1 O1 Ba6 171.7(4) . 3 ?
B1 O2 Ba3 146.5(11) . . ?
B1 O2 Ba1 95.1(10) . . ?
Ba3 O2 Ba1 103.1(4) . . ?
B1 O2 Ba2 99.8(9) . 5_455 ?
Ba3 O2 Ba2 101.6(4) . 5_455 ?
Ba1 O2 Ba2 106.5(5) . 5_455 ?
B1 O3 Ba4 142.3(12) 5 7 ?
B1 O3 Ba6 92.9(10) 5 7 ?
Ba4 O3 Ba6 99.4(4) 7 7 ?
B1 O3 Ba5 126.3(11) 5 2_655 ?
Ba4 O3 Ba5 89.7(4) 7 2_655 ?
Ba6 O3 Ba5 88.9(4) 7 2_655 ?
B1 O3 Ba2 85.2(10) 5 . ?
Ba4 O3 Ba2 84.8(3) 7 . ?
Ba6 O3 Ba2 175.0(5) 7 . ?
Ba5 O3 Ba2 88.5(4) 2_655 . ?
O5 B2 O6 120.3(6) . . ?
O5 B2 O4 119.0(6) . 5_455 ?
O6 B2 O4 120.0(6) . 5_455 ?
O5 B2 Ba7 67.7(8) . . ?
O6 B2 Ba7 144.8(14) . . ?
O4 B2 Ba7 68.9(8) 5_455 . ?
O5 B2 Ba3 66.7(8) . . ?
O6 B2 Ba3 133.6(13) . . ?
O4 B2 Ba3 66.4(7) 5_455 . ?
Ba7 B2 Ba3 81.59(17) . . ?
O5 B2 Ba4 67.4(7) . . ?
O6 B2 Ba4 70.7(7) . . ?
O4 B2 Ba4 144.0(14) 5_455 . ?
Ba7 B2 Ba4 84.0(5) . . ?
Ba3 B2 Ba4 134.0(2) . . ?
O5 B2 Ba5 142.3(14) . 3_554 ?
O6 B2 Ba5 71.0(7) . 3_554 ?
O4 B2 Ba5 68.0(7) 5_455 3_554 ?
Ba7 B2 Ba5 83.7(5) . 3_554 ?
Ba3 B2 Ba5 134.5(2) . 3_554 ?
Ba4 B2 Ba5 86.4(5) . 3_554 ?
O5 B2 Ba1 66.6(7) . . ?
O6 B2 Ba1 64.1(7) . . ?
O4 B2 Ba1 138.9(14) 5_455 . ?
Ba7 B2 Ba1 134.2(2) . . ?
Ba3 B2 Ba1 82.5(5) . . ?
Ba4 B2 Ba1 77.10(15) . . ?
Ba5 B2 Ba1 135.1(2) 3_554 . ?
O5 B2 Ba2 140.1(14) . 5_455 ?
O6 B2 Ba2 64.6(7) . 5_455 ?
O4 B2 Ba2 65.1(8) 5_455 5_455 ?
Ba7 B2 Ba2 133.9(2) . 5_455 ?
Ba3 B2 Ba2 82.5(5) . 5_455 ?
Ba4 B2 Ba2 135.2(2) . 5_455 ?
Ba5 B2 Ba2 77.48(15) 3_554 5_455 ?
Ba1 B2 Ba2 85.5(5) . 5_455 ?
B2 O4 Ba6 173.4(7) 5 6 ?
B2 O4 Ba3 86.8(8) 5 5 ?
Ba6 O4 Ba3 90.6(2) 6 5 ?
B2 O4 Ba7 84.0(8) 5 5 ?
Ba6 O4 Ba7 89.9(3) 6 5 ?
Ba3 O4 Ba7 89.52(15) 5 5 ?
B2 O4 Ba2 89.4(8) 5 . ?
Ba6 O4 Ba2 96.8(3) 6 . ?
Ba3 O4 Ba2 92.5(5) 5 . ?
Ba7 O4 Ba2 173.0(2) 5 . ?
B2 O4 Ba5 86.1(8) 5 7_554 ?
Ba6 O4 Ba5 96.6(3) 6 7_554 ?
Ba3 O4 Ba5 172.8(2) 5 7_554 ?
Ba7 O4 Ba5 91.2(5) 5 7_554 ?
Ba2 O4 Ba5 85.92(14) . 7_554 ?
B2 O5 Ba6 173.5(5) . . ?
B2 O5 Ba7 85.5(8) . . ?
Ba6 O5 Ba7 89.3(3) . . ?
B2 O5 Ba3 86.9(9) . . ?
Ba6 O5 Ba3 89.2(3) . . ?
Ba7 O5 Ba3 90.01(15) . . ?
B2 O5 Ba4 86.9(8) . . ?
Ba6 O5 Ba4 97.2(3) . . ?
Ba7 O5 Ba4 92.5(5) . . ?
Ba3 O5 Ba4 173.2(3) . . ?
B2 O5 Ba1 88.3(8) . . ?
Ba6 O5 Ba1 97.1(3) . . ?
Ba7 O5 Ba1 173.4(2) . . ?
Ba3 O5 Ba1 91.7(5) . . ?
Ba4 O5 Ba1 85.16(14) . . ?
B2 O6 Ba6 172.9(12) . 6 ?
B2 O6 Ba1 90.4(7) . . ?
Ba6 O6 Ba1 95.0(2) 6 . ?
B2 O6 Ba2 90.0(7) . 5_455 ?
Ba6 O6 Ba2 93.7(2) 6 5_455 ?
Ba1 O6 Ba2 97.7(4) . 5_455 ?
B2 O6 Ba4 83.5(8) . . ?
Ba6 O6 Ba4 92.5(2) 6 . ?
Ba1 O6 Ba4 84.75(14) . . ?
Ba2 O6 Ba4 173.1(2) 5_455 . ?
B2 O6 Ba5 83.3(8) . 3_554 ?
Ba6 O6 Ba5 91.1(2) 6 3_554 ?
Ba1 O6 Ba5 173.3(2) . 3_554 ?
Ba2 O6 Ba5 84.83(14) 5_455 3_554 ?
Ba4 O6 Ba5 92.1(3) . 3_554 ?
O9 B3 O7 119.7(13) 5 . ?
O9 B3 O8 123.9(13) 5 6 ?
O7 B3 O8 115.9(15) . 6 ?
O9 B3 Ba5 59.3(8) 5 6 ?
O7 B3 Ba5 148.8(11) . 6 ?
O8 B3 Ba5 77.1(8) 6 6 ?
O9 B3 Ba4 58.5(8) 5 7 ?
O7 B3 Ba4 70.6(8) . 7 ?
O8 B3 Ba4 155.9(11) 6 7 ?
Ba5 B3 Ba4 86.8(5) 6 7 ?
O9 B3 Ba6 149.6(11) 5 6 ?
O7 B3 Ba6 64.4(8) . 6 ?
O8 B3 Ba6 57.4(8) 6 6 ?
Ba5 B3 Ba6 134.5(5) 6 6 ?
Ba4 B3 Ba6 135.0(5) 7 6 ?
O9 B3 Ba3 76.9(9) 5 5 ?
O7 B3 Ba3 96.7(10) . 5 ?
O8 B3 Ba3 90.2(9) 6 5 ?
Ba5 B3 Ba3 112.1(5) 6 5 ?
Ba4 B3 Ba3 112.7(5) 7 5 ?
Ba6 B3 Ba3 72.7(4) 6 5 ?
B3 O7 Ba2 134.2(10) . . ?
B3 O7 Ba1 128.3(10) . . ?
Ba2 O7 Ba1 97.3(4) . . ?
B3 O7 Ba6 90.0(9) . 6 ?
Ba2 O7 Ba6 95.8(4) . 6 ?
Ba1 O7 Ba6 88.2(3) . 6 ?
B3 O7 Ba4 83.2(9) . 7 ?
Ba2 O7 Ba4 88.2(4) . 7 ?
Ba1 O7 Ba4 96.9(4) . 7 ?
Ba6 O7 Ba4 173.1(5) 6 7 ?
B3 O8 Ba1 135.6(9) 6_545 . ?
B3 O8 Ba6 97.0(9) 6_545 . ?
Ba1 O8 Ba6 101.6(4) . . ?
B3 O8 Ba2 128.0(10) 6_545 2_655 ?
Ba1 O8 Ba2 91.4(3) . 2_655 ?
Ba6 O8 Ba2 92.1(3) . 2_655 ?
B3 O8 Ba5 77.1(9) 6_545 . ?
Ba1 O8 Ba5 84.1(3) . . ?
Ba6 O8 Ba5 173.8(4) . . ?
Ba2 O8 Ba5 90.2(3) 2_655 . ?
B3 O9 Ba7 150.5(11) 5_455 3 ?
B3 O9 Ba4 96.0(9) 5_455 3 ?
Ba7 O9 Ba4 102.2(4) 3 3 ?
B3 O9 Ba5 95.1(9) 5_455 2 ?
Ba7 O9 Ba5 101.9(4) 3 2 ?
Ba4 O9 Ba5 106.0(4) 3 2 ?
B3 O9 Ba3 79.4(9) 5_455 . ?
Ba7 O9 Ba3 71.1(3) 3 . ?
Ba4 O9 Ba3 127.8(4) 3 . ?
Ba5 O9 Ba3 126.2(4) 2 . ?
OC2 BC1 OC2 122.9(13) . 2_655 ?
OC2 BC1 OC1 118.6(6) . . ?
OC2 BC1 OC1 118.6(6) 2_655 . ?
OC2 BC1 Ba1 114.9(4) . 2_655 ?
OC2 BC1 Ba1 91.0(4) 2_655 2_655 ?
OC1 BC1 Ba1 62.7(2) . 2_655 ?
OC2 BC1 Ba1 91.0(4) . . ?
OC2 BC1 Ba1 114.9(4) 2_655 . ?
OC1 BC1 Ba1 62.7(2) . . ?
Ba1 BC1 Ba1 125.5(4) 2_655 . ?
OC2 BC1 Ba2 169.2(4) . . ?
OC2 BC1 Ba2 56.3(5) 2_655 . ?
OC1 BC1 Ba2 63.4(2) . . ?
Ba1 BC1 Ba2 75.64(17) 2_655 . ?
Ba1 BC1 Ba2 80.67(19) . . ?
OC2 BC1 Ba2 56.3(5) . 2_655 ?
OC2 BC1 Ba2 169.2(4) 2_655 2_655 ?
OC1 BC1 Ba2 63.4(2) . 2_655 ?
Ba1 BC1 Ba2 80.66(19) 2_655 2_655 ?
Ba1 BC1 Ba2 75.64(17) . 2_655 ?
Ba2 BC1 Ba2 126.8(4) . 2_655 ?
BC1 OC1 Li1 180.0 . . ?
BC1 OC1 Ba1 91.9(2) . 2_655 ?
Li1 OC1 Ba1 88.1(2) . 2_655 ?
BC1 OC1 Ba1 91.9(2) . . ?
Li1 OC1 Ba1 88.1(2) . . ?
Ba1 OC1 Ba1 176.1(4) 2_655 . ?
BC1 OC1 Ba2 91.9(2) . . ?
Li1 OC1 Ba2 88.1(2) . . ?
Ba1 OC1 Ba2 86.85(3) 2_655 . ?
Ba1 OC1 Ba2 93.02(3) . . ?
BC1 OC1 Ba2 91.9(2) . 2_655 ?
Li1 OC1 Ba2 88.1(2) . 2_655 ?
Ba1 OC1 Ba2 93.02(3) 2_655 2_655 ?
Ba1 OC1 Ba2 86.85(3) . 2_655 ?
Ba2 OC1 Ba2 176.2(4) . 2_655 ?
BC1 OC2 Ba5 132.2(5) . . ?
BC1 OC2 Ba4 117.3(5) . 8_545 ?
Ba5 OC2 Ba4 100.6(3) . 8_545 ?
BC1 OC2 Ba2 99.5(7) . 2_655 ?
Ba5 OC2 Ba2 106.0(3) . 2_655 ?
Ba4 OC2 Ba2 94.1(3) 8_545 2_655 ?
F1 Li1 F1 166.5(19) . 2_655 ?
F1 Li1 F2 90.1(3) . . ?
F1 Li1 F2 88.6(3) 2_655 . ?
F1 Li1 F2 88.6(3) . 2_655 ?
F1 Li1 F2 90.1(3) 2_655 2_655 ?
F2 Li1 F2 168.9(17) . 2_655 ?
F1 Li1 OC1 83.3(10) . . ?
F1 Li1 OC1 83.3(10) 2_655 . ?
F2 Li1 OC1 84.4(9) . . ?
F2 Li1 OC1 84.4(9) 2_655 . ?
F1 Li1 Ba4 131.1(7) . 2_655 ?
F1 Li1 Ba4 57.7(5) 2_655 2_655 ?
F2 Li1 Ba4 130.0(7) . 2_655 ?
F2 Li1 Ba4 57.2(4) 2_655 2_655 ?
OC1 Li1 Ba4 121.7(4) . 2_655 ?
F1 Li1 Ba4 57.7(5) . . ?
F1 Li1 Ba4 131.1(7) 2_655 . ?
F2 Li1 Ba4 57.2(4) . . ?
F2 Li1 Ba4 130.0(7) 2_655 . ?
OC1 Li1 Ba4 121.7(4) . . ?
Ba4 Li1 Ba4 116.6(9) 2_655 . ?
F1 Li1 Ba5 128.7(7) . 8_544 ?
F1 Li1 Ba5 59.8(5) 2_655 8_544 ?
F2 Li1 Ba5 53.7(4) . 8_544 ?
F2 Li1 Ba5 133.8(7) 2_655 8_544 ?
OC1 Li1 Ba5 121.4(4) . 8_544 ?
Ba4 Li1 Ba5 76.7(4) 2_655 8_544 ?
Ba4 Li1 Ba5 71.5(4) . 8_544 ?
F1 Li1 Ba5 59.8(5) . 7_554 ?
F1 Li1 Ba5 128.7(7) 2_655 7_554 ?
F2 Li1 Ba5 133.8(7) . 7_554 ?
F2 Li1 Ba5 53.7(4) 2_655 7_554 ?
OC1 Li1 Ba5 121.4(4) . 7_554 ?
Ba4 Li1 Ba5 71.5(4) 2_655 7_554 ?
Ba4 Li1 Ba5 76.7(4) . 7_554 ?
Ba5 Li1 Ba5 117.3(8) 8_544 7_554 ?
F1 Li1 Ba1 119.0(9) . 2_655 ?
F1 Li1 Ba1 51.1(6) 2_655 2_655 ?
F2 Li1 Ba1 119.2(9) . 2_655 ?
F2 Li1 Ba1 52.6(5) 2_655 2_655 ?
OC1 Li1 Ba1 52.2(4) . 2_655 ?
Ba4 Li1 Ba1 69.49(6) 2_655 2_655 ?
Ba4 Li1 Ba1 173.9(8) . 2_655 ?
Ba5 Li1 Ba1 110.88(7) 8_544 2_655 ?
Ba5 Li1 Ba1 106.33(7) 7_554 2_655 ?
F1 Li1 Ba1 51.1(6) . . ?
F1 Li1 Ba1 119.0(9) 2_655 . ?
F2 Li1 Ba1 52.6(5) . . ?
F2 Li1 Ba1 119.2(9) 2_655 . ?
OC1 Li1 Ba1 52.2(4) . . ?
Ba4 Li1 Ba1 173.9(8) 2_655 . ?
Ba4 Li1 Ba1 69.49(6) . . ?
Ba5 Li1 Ba1 106.33(7) 8_544 . ?
Ba5 Li1 Ba1 110.88(7) 7_554 . ?
Ba1 Li1 Ba1 104.5(7) 2_655 . ?
F1 Li1 Ba2 117.3(9) . 2_655 ?
F1 Li1 Ba2 53.2(5) 2_655 2_655 ?
F2 Li1 Ba2 48.8(5) . 2_655 ?
F2 Li1 Ba2 122.8(9) 2_655 2_655 ?
OC1 Li1 Ba2 53.1(4) . 2_655 ?
Ba4 Li1 Ba2 110.83(7) 2_655 2_655 ?
Ba4 Li1 Ba2 106.01(7) . 2_655 ?
Ba5 Li1 Ba2 68.27(5) 8_544 2_655 ?
Ba5 Li1 Ba2 174.5(8) 7_554 2_655 ?
Ba1 Li1 Ba2 70.5(4) 2_655 2_655 ?
Ba1 Li1 Ba2 66.3(4) . 2_655 ?
Li1 F1 Ba1 95.4(7) . . ?
Li1 F1 Ba4 86.1(7) . . ?
Ba1 F1 Ba4 89.10(15) . . ?
Li1 F1 Ba6 172.6(11) . 6 ?
Ba1 F1 Ba6 89.3(2) . 6 ?
Ba4 F1 Ba6 88.3(3) . 6 ?
Li1 F1 Ba2 94.0(7) . . ?
Ba1 F1 Ba2 93.5(4) . . ?
Ba4 F1 Ba2 177.3(5) . . ?
Ba6 F1 Ba2 91.4(2) 6 . ?
Li1 F1 Ba5 85.4(7) . 7_554 ?
Ba1 F1 Ba5 178.1(4) . 7_554 ?
Ba4 F1 Ba5 92.7(4) . 7_554 ?
Ba6 F1 Ba5 90.1(3) 6 7_554 ?
Ba2 F1 Ba5 84.64(14) . 7_554 ?
Li1 F2 Ba2 95.3(6) . 2_655 ?
Li1 F2 Ba5 88.0(6) . 8_544 ?
Ba2 F2 Ba5 92.03(14) 2_655 8_544 ?
Li1 F2 Ba4 83.3(6) . . ?
Ba2 F2 Ba4 177.5(4) 2_655 . ?
Ba5 F2 Ba4 90.0(4) 8_544 . ?
Li1 F2 Ba1 90.5(6) . . ?
Ba2 F2 Ba1 89.7(4) 2_655 . ?
Ba5 F2 Ba1 177.8(3) 8_544 . ?
Ba4 F2 Ba1 88.20(13) . . ?
Li1 F2 Ba6 174.3(10) . . ?
Ba2 F2 Ba6 88.3(2) 2_655 . ?
Ba5 F2 Ba6 87.4(2) 8_544 . ?
Ba4 F2 Ba6 93.2(3) . . ?
Ba1 F2 Ba6 93.9(2) . . ?

_refine_diff_density_max         1.135
_refine_diff_density_min         -1.038
_refine_diff_density_rms         0.249

_shelx_res_file                  
;
 
TITL LiBa_oct in P4(2)bc
    shelx.res
    created by SHELXL-2016/6 at 12:02:28 on 18-Mar-2017
CELL 0.71073  13.534908  13.534908  14.938492  90.0000  90.0000  90.0000
ZERR    4.00   0.000083   0.000083   0.000159   0.0000   0.0000   0.0000
LATT -1
SYMM -x,-y, z
SYMM -y, x, z+1/2
SYMM  y,-x, z+1/2
SYMM  x+1/2,-y+1/2, z
SYMM -x+1/2, y+1/2, z
SYMM -y+1/2,-x+1/2, z+1/2
SYMM  y+1/2, x+1/2, z+1/2
SFAC Li B O F Ba
UNIT 4.00 28.00 84.00 16.00 48.00
ACTA
L.S. 40
BOND
FMAP 2
PLAN 20
WGHT    0.014500   33.342197
EXTI    0.002807
FVAR       0.14241
BA1   5    0.300062    0.063703    0.449495    11.00000    0.01057    0.01217 =
         0.01083    0.00122   -0.00172    0.00032
BA2   5    0.576688    0.202262    0.449390    11.00000    0.01189    0.01139 =
         0.01398    0.00011    0.00240    0.00123
BA3   5    0.000000    0.000000    0.450174    10.50000    0.01482    0.01974 =
         0.00857    0.00000    0.00000   -0.00861
BA4   5    0.298272    0.063227    0.183805    11.00000    0.01079    0.01103 =
         0.01068    0.00153   -0.00068    0.00008
BA5   5    0.295100   -0.078117    0.681078    11.00000    0.01161    0.01132 =
         0.01225   -0.00096   -0.00042    0.00134
BA6   5    0.168440   -0.180611    0.315576    11.00000    0.00937    0.01042 =
         0.01217   -0.00103   -0.00039    0.00250
BA7   5    0.000000    0.000000    0.183477    10.50000    0.02386    0.01293 =
         0.01038    0.00000    0.00000   -0.00590
B1    2    0.169857    0.151227    0.605214    11.00000    0.02060    0.01754 =
         0.00711    0.00888   -0.00270   -0.00188
O1    3    0.254349    0.110430    0.636807    11.00000    0.01699    0.01639 =
         0.02579    0.00256   -0.00875    0.00947
O2    3    0.127286    0.118155    0.524888    11.00000    0.01682    0.01867 =
         0.01609   -0.01101   -0.00746    0.00970
O3    3    0.622676    0.272641    0.644948    11.00000    0.01456    0.04802 =
         0.02677    0.01859   -0.00640   -0.01231
B2    2    0.123366    0.117692    0.313779    11.00000    0.00717
O4    3    0.525017    0.353720    0.317077    11.00000    0.01025    0.01160 =
         0.01980   -0.01302    0.00328   -0.00202
O5    3    0.145881    0.019164    0.315410    11.00000    0.01378    0.00868 =
         0.01976    0.00597   -0.00693    0.00034
O6    3    0.197334    0.187662    0.321725    11.00000    0.01261
B3    2    0.342533    0.332585    0.531772    11.00000    0.00725
O7    3    0.387564    0.249625    0.493396    11.00000    0.01982
O8    3    0.234748   -0.124742    0.482030    11.00000    0.01211    0.02473 =
         0.01342    0.00307    0.00502   -0.00278
O9    3   -0.118029    0.126152    0.607075    11.00000    0.01633
BC1   2    0.500000    0.000000    0.547490    10.50000    0.01142    0.01279 =
         0.01656    0.00000    0.00000    0.00417
OC1   3    0.500000    0.000000    0.455894    10.50000    0.02203    0.01812 =
         0.01112    0.00000    0.00000    0.00019
OC2   3    0.452365   -0.074212    0.590997    11.00000    0.02133    0.01929 =
         0.03475    0.00674    0.00200   -0.00204
LI1   1    0.500000    0.000000    0.302194    10.50000    0.02128
F1    4    0.432602    0.129658    0.317817    11.00000    0.02078    0.02482 =
         0.03474   -0.01511   -0.00145   -0.00224
F2    4    0.360444   -0.074875    0.316139    11.00000    0.02222    0.01758 =
         0.01837    0.00004    0.00940    0.00348
HKLF 4
 
 
 
 
REM  LiBa_oct in P4(2)bc
REM R1 =  0.0300 for    4830 Fo > 4sig(Fo)  and  0.0308 for all    4900 data
REM    179 parameters refined using      1 restraints
 
END
 
WGHT      0.0145     33.3431
 
REM Highest difference peak  1.135,  deepest hole -1.038,  1-sigma level  0.249
Q1    1   0.3372  0.1163  0.4203  11.00000  0.05    1.14
Q2    1   0.1942 -0.1221  0.2809  11.00000  0.05    1.11
Q3    1  -0.0302  0.0003  0.5181  11.00000  0.05    1.11
Q4    1   0.2972  0.1307  0.1489  11.00000  0.05    1.09
Q5    1   0.3206 -0.0418  0.7273  11.00000  0.05    1.04
Q6    1   0.2741  0.1333  0.1972  11.00000  0.05    1.04
Q7    1   0.5428  0.2362  0.3982  11.00000  0.05    1.03
Q8    1   0.3042 -0.0409  0.7873  11.00000  0.05    1.00
Q9    1   0.2638 -0.0441  0.7328  11.00000  0.05    1.00
Q10   1   0.5745  0.3569  0.2778  11.00000  0.05    0.99
Q11   1   0.3398  0.0183  0.4476  11.00000  0.05    0.99
Q12   1   0.3060  0.0937  0.1154  11.00000  0.05    0.98
Q13   1   0.1974 -0.1219  0.3491  11.00000  0.05    0.94
Q14   1   0.2916  0.0857  0.2482  11.00000  0.05    0.93
Q15   1   0.0000  0.0000  0.2468  10.50000  0.05    0.91
Q16   1   0.3151  0.0799  0.5231  11.00000  0.05    0.91
Q17   1   0.5074  0.2941  0.3166  11.00000  0.05    0.91
Q18   1   0.2006 -0.1675  0.4352  11.00000  0.05    0.90
Q19   1   0.3267  0.0306  0.1298  11.00000  0.05    0.89
Q20   1   0.1472 -0.2287  0.2617  11.00000  0.05    0.88
;
_shelx_res_checksum              70811

_shelx_hkl_file                  
;
   0   0  -2 693.598 16.4142   3
   0   0  -2 754.286 17.6711   2
   0   0  -2 767.957 16.8517   4
   0   0  -3 24.7520 4.55573   2
   0   0   3 22.7374 3.90359   1
   0   0   3 21.0644 4.16058   3
   0   0  -3 23.7657 4.15627   4
   0   0  -3 33.8294 5.36750   3
   0   0   3 23.4562 4.25140   4
   0   0  -3 25.8134 4.04445   1
   0   0  -3 35.4025 4.99611   2
   0   0   4 9337.37 80.3753   1
   0   0  -4 9529.15 89.4909   2
   0   0  -4 10457.5 89.2466   3
   0   0  -4 9135.03 88.6862   2
   0   0   4 10113.8 87.0383   4
   0   0  -4 10592.4 86.4123   1
   0   0   4 9332.94 84.9696   3
   0   0  -5-0.09081 2.78012   2
   0   0   5 6.95455 3.96428   3
   0   0   5 7.19474 3.51884   1
   0   0  -5 3.34393 3.06701   3
   0   0   5-3.16543 2.63444   4
   0   0  -5-0.14925 1.36813   1
   0   0  -5-1.51834 2.37073   2
   0   0  -5-2.98626 2.05532   4
   0   0  -6 12528.8 120.067   4
   0   0   6 11961.5 110.178   1
   0   0  -6 12115.6 123.250   2
   0   0  -6 12783.7 126.650   2
   0   0  -6 12450.4 119.149   3
   0   0   6 13206.8 123.672   3
   0   0  -7 18.1425 6.50544   2
   0   0   7 10.7241 4.68678   1
   0   0  -7 11.0211 5.45213   3
   0   0  -7 10.7498 5.21049   2
   0   0   7 9.83054 5.33072   3
   0   0  -7 11.3666 4.37617   1
   0   0  -7 3.10491 2.54974   4
   0   0   7 0.81361 2.22661   4
   0   0   8 19781.5 174.804   4
   0   0  -8 19977.0 167.507   1
   0   0   8 20857.0 166.833   1
   0   0   8 19484.5 174.769   3
   0   0   9 2.89885 4.50060   3
   0   0  -9-1.79030 2.45573   1
   0   0  -9-1.97477 3.56255   2
   0   0   9 2.91022 2.74703   1
   0   0   9 1.81883 2.45772   4
   0   0  -9 10.1583 5.65449   4
   0   0  -9 0.45607 2.12953   3
   0   0  -9 3.68472 3.84611   2
   0   0  10 953.887 43.4491   4
   0   0 -10 861.682 41.2529   3
   0   0 -10 884.435 43.6204   2
   0   0 -10 909.028 40.4716   1
   0   0  10 921.833 42.9054   3
   0   0 -10 991.247 45.8412   2
   0   0 -10 892.894 42.1919   4
   0   0  11 9.19812 5.54858   4
   0   0 -11-1.20065 4.47611   1
   0   0 -11 7.32330 6.03011   3
   0   0  11 1.91681 3.24928   3
   0   0  11 10.6220 5.79351   1
   0   0 -11 5.50071 5.15875   2
   0   0 -11 12.7032 6.33489   4
   0   0 -11 0.63064 3.67594   2
   0   0  12 5543.99 107.706   1
   0   0 -12 5197.41 118.656   2
   0   0 -12 5447.16 109.517   1
   0   0 -12 5427.11 115.191   4
   0   0 -12 5021.97 114.228   2
   0   0  12 5388.16 115.034   3
   0   0 -12 5547.32 116.860   3
   0   0  12 5431.05 115.909   4
   0   0  13 24.6912 8.28203   3
   0   0 -13 37.0120 12.4058   2
   0   0  13 18.0825 8.02317   1
   0   0 -13 7.50111 5.18750   3
   0   0  13 13.0717 8.48297   4
   0   0 -13 15.2895 8.97684   4
   0   0 -13 22.6363 8.63431   1
   0   0 -13 8.79343 9.26795   2
   0   0 -14 11842.7 193.750   2
   0   0 -14 11657.7 186.346   4
   0   0  14 12861.1 181.063   1
   0   0 -14 12345.2 194.168   2
   0   0  14 12374.9 191.337   3
   0   0 -14 12567.6 191.937   3
   0   0 -14 11595.9 174.893   1
   0   0  14 12798.8 193.892   4
   0   0  15 75.0277 15.5696   1
   0   0 -15 76.9227 18.4573   4
   0   0  15 113.134 21.5812   3
   0   0 -15 109.039 20.3269   2
   0   0  15 91.8196 17.6646   4
   0   0 -15 80.6467 15.9110   1
   0   0 -15 87.0510 18.3832   3
   0   0 -15 106.493 20.6680   2
   0   0  16 9247.53 181.247   3
   0   0 -16 9259.66 169.393   1
   0   0 -16 9440.33 182.880   4
   0   0 -16 8957.30 181.314   2
   0   0 -16 9166.02 180.399   3
   0   0 -17 100.261 22.0369   4
   0   0 -17 98.2933 21.8481   2
   0   0 -17 97.0602 21.2718   3
   0   0 -17 90.7850 20.8003   2
   0   0 -17 57.5284 17.5054   1
   0   0  17 75.0870 17.0270   1
   0   0 -17 90.3695 20.5584   4
   0   0  17 67.9922 18.5664   3
   0   0 -18 2667.70 107.143   4
   0   0 -18 2794.41 108.231   4
   0   0  18 2635.49 97.7518   1
   0   0 -18 2795.60 109.941   2
   0   0 -18 2647.79 97.8255   1
   0   0  18 2720.99 106.758   3
   0   0 -18 2884.19 109.619   3
   0   0 -18 2818.01 107.440   2
   0   0 -19 24.4711 14.8198   3
   0   0 -19 39.7486 17.5426   2
   0   0 -19 46.6975 18.3483   2
   0   0 -19 48.5215 18.2893   1
   0   0  19 11.6750 11.0984   1
   0   0  19 48.7093 19.9384   3
   0   0 -19 69.4451 25.4819   4
   0   0 -19 22.8665 16.5986   4
   0   0 -20 593.189 54.4342   4
   0   0 -20 561.170 54.5227   4
   0   0 -20 536.766 51.6759   3
   0   0 -20 502.818 46.9122   1
   0   0  20 641.789 57.1372   3
   0   0 -20 578.758 52.2101   2
   0   0  20 578.590 48.9685   1
   0   0 -20 572.648 53.9979   2
   0   0 -21 36.4128 23.0189   3
   0   0 -21 17.0822 16.9037   2
   0   0 -21 6.75792 15.8769   2
   0   0 -21 11.7772 16.3858   4
   0   0 -21 6.56128 16.9880   4
   0   0 -21 5.03872 12.8508   1
   0   0  21 9.08563 15.6903   3
   0   0  21 7.17973 13.6523   1
   0   0 -22 7533.14 203.645   4
   0   0 -22 7248.00 194.541   2
   0   0 -22 7511.17 204.108   3
   0   0 -22 7501.51 187.037   1
   0   0 -22 6743.82 197.484   4
   0   0 -22 6948.78 195.963   2
   0   0  22 6869.12 196.336   3
  -1   0  -1 5.71359 1.25608   4
   0  -1   1 6.73871 1.38520   3
   0  -1   1 3.54244 1.02918   2
   0  -1  -1 8.64296 1.81456   4
   0  -1  -1 4.35931 1.30213   2
   1   0  -1 2.60813 0.99902   1
   1   0  -1 5.27760 1.33314   3
   0   1  -1 3.84027 1.06384   1
   0  -1  -1 4.31387 2.07161   1
  -1   0   1 5.46416 1.25010   4
   0  -1   1 10.3329 1.46070   4
  -1   0  -2 5.50103 1.29867   3
   0  -1  -2 3.74488 2.06112   3
  -1   0  -2 4.11739 1.54430   2
   0  -1  -2 2.41051 2.18009   1
  -1   0  -2 2.21062 0.82270   1
   1   0  -2 5.44532 2.09159   3
   0  -1  -2 3.26540 1.31031   2
   0  -1  -2 16.0108 2.93395   4
   0  -1   2 3.91017 1.33140   2
   0   1  -2 6.23976 1.26522   1
  -1   0  -2 2.33854 0.96233   4
   1   0  -2-0.94957 0.98018   4
   0   1  -2 10.1949 2.01376   4
   1   0  -2 8.48458 2.61164   1
   0   1  -2 2.78950 1.19098   3
  -1   0   2 4.35773 1.47024   2
   0  -1  -3 27.2405 4.67279   1
  -1   0  -3 16.9323 3.54839   4
   0  -1   3 2.23657 1.86509   3
   0   1   3-0.42955 1.81314   3
   1   0  -3 26.9462 4.30453   2
   0   1  -3 8.76550 2.55851   4
  -1   0   3 11.1545 2.59967   2
  -1   0  -3-1.10408 1.49868   3
   0  -1  -3 0.67094 1.10644   3
   1   0  -3 10.8695 2.44809   1
  -1   0  -3 1.99407 1.59886   1
   1   0   3 21.2846 3.16017   1
   1   0  -3 5.83637 2.45805   3
   0   1   3 0.27123 1.61678   2
   0   1  -3 10.1003 2.71925   3
   0   1   3 58.9377 6.37589   1
   1   0   3 5.91480 2.22416   3
   0   1   3 3.47443 2.18752   4
  -1   0   3 7.46282 2.25704   3
  -1   0  -3 25.6574 4.39605   2
   0   1  -3 1.66517 1.19245   1
   1   0  -3 4.73846 1.68812   4
   0  -1  -3 2.42505 2.08240   4
   0  -1   3 10.2296 2.17230   1
   1   0   3 24.7911 4.19587   2
  -1   0   3 0.23504 1.26988   4
   0   1  -3 6.40640 2.44246   2
   0  -1  -3 3.92178 2.62711   2
   0  -1   3-1.76077 1.49883   2
   0  -1   3 9.14108 3.04226   4
  -1   0   3 8.16955 2.52521   1
   1   0   3 31.4687 4.49155   4
  -1   0   4 0.33731 1.21827   3
   0   1  -4-0.57244 1.67407   2
   0  -1   4-1.62414 1.37359   1
   0  -1   4-0.42603 1.23810   4
  -1   0  -4 4.75326 1.72516   1
   1   0   4-2.02244 1.91374   1
  -1   0   4 2.43503 2.10177   1
   0  -1  -4 4.30228 2.43861   4
   0   1   4 0.43071 1.49803   4
   0   1   4 2.30294 2.21835   2
   0   1  -4-4.62629 2.50586   3
   1   0  -4-6.39569 3.12278   3
   1   0  -4 2.50202 2.36992   2
   0  -1   4 4.68732 3.34787   3
   1   0   4 0.40551 1.06139   4
  -1   0   4-2.85434 2.23901   2
   0  -1  -4 1.42943 2.34015   2
   1   0  -4-0.88982 2.96851   1
   1   0   4 2.68722 1.52238   3
  -1   0  -4-0.06205 1.72656   3
   0   1  -4 1.24155 1.47769   4
  -1   0   4 3.08926 2.57759   4
   1   0  -4 2.84213 2.74821   4
   0   1   4 5.44437 3.42625   3
   0  -1  -4 4.06649 2.17169   1
   1   0   4-4.13820 3.47158   2
   0  -1  -4 5.74191 2.69717   3
  -1   0  -4-0.41138 1.87569   4
   0   1  -4 1.67440 1.51171   1
   0  -1   4-0.07141 2.37640   2
  -1   0  -4 1.16173 1.70612   2
   0   1   4 7.01784 3.36224   1
   0  -1  -5 36.8703 6.32254   2
   1   0   5 7.80514 4.18917   3
   0   1  -5 1.07917 2.40869   2
  -1   0   5 24.2685 5.58946   1
   0  -1   5 1.23169 1.70454   4
   1   0  -5 6.01062 2.37524   1
   1   0  -5 7.89074 3.65535   2
   0   1   5-2.81948 2.67413   2
   0  -1   5 0.45177 1.49375   3
   1   0  -5 11.6187 4.26062   3
   0   1  -5-2.62691 2.56546   2
  -1   0  -5 6.37967 2.80182   4
   0  -1  -5 0.82288 3.46060   3
   0   1  -5 4.27698 1.75539   1
   1   0   5 5.55997 1.72618   4
   0  -1  -5 2.37652 2.73570   1
   0   1   5 6.08689 3.25559   1
  -1   0   5 0.42046 1.86205   3
   1   0   5 18.0817 4.84540   2
   0   1   5 4.37936 3.04076   4
  -1   0   5 6.91139 3.46515   4
  -1   0  -5 4.91731 3.27418   1
   0   1   5 4.84102 3.35655   3
   1   0   5 14.8150 3.45319   1
   0  -1  -5 0.17669 2.02666   4
   1   0  -5 0.39809 2.70078   4
   0   1  -5-2.26460 2.15036   4
  -1   0   5 0.87589 1.95456   2
  -1   0  -5-1.96330 2.10374   3
  -1   0  -5 1.63778 1.66269   2
   0   1  -5 7.62250 3.40363   3
   0  -1   5 6.35086 2.29973   1
   1   0   6 4.83685 2.99785   1
   0  -1   6 0.65535 1.87785   4
   0  -1  -6 0.98600 2.03004   2
   0   1   6 1.02243 3.43191   1
   0   1   6-0.44531 2.26323   3
   0  -1   6 4.95912 2.49752   3
   0   1  -6-0.09481 2.12703   4
   0  -1  -6 4.18427 2.99791   2
   1   0   6-1.68190 2.81659   3
   1   0  -6 4.33954 3.91741   1
  -1   0  -6 2.40511 3.89208   2
   0  -1   6-2.92206 2.57559   1
   0  -1  -6 0.39974 3.19334   1
  -1   0  -6 2.34795 2.47515   4
   0  -1  -6-0.20952 2.18882   4
   0  -1  -6 7.25850 3.51223   3
   1   0  -6-1.01877 3.13907   3
   0   1  -6 5.26646 2.67127   1
  -1   0  -6 7.36911 4.05709   3
  -1   0   6-0.30209 2.56685   3
  -1   0  -6 1.62022 1.92755   1
   1   0   6 2.13399 3.14033   4
   1   0  -6 10.5582 3.92606   4
   0   1   6 2.72221 3.34720   4
  -1   0   6 2.11634 2.91827   4
   0   1  -6 10.9547 3.73884   3
   1   0  -6 2.96180 4.15274   2
   1   0  -6 4.67936 2.96827   2
   0   1  -6 12.1196 4.97719   2
   0   1  -6 0.10827 2.50710   2
  -1   0   6 0.77617 1.90576   1
   1   0   6 0.89102 2.35807   2
   0  -1  -7 1.50679 2.52540   2
   1   0  -7 4.66214 2.73743   1
   0  -1  -7 7.17321 2.24840   1
   0   1  -7 14.5265 4.90442   1
  -1   0   7 9.19950 4.41197   1
   0  -1  -7 6.01235 3.58081   4
   0  -1  -7 7.17210 3.41298   3
  -1   0  -7 19.3766 6.30734   2
  -1   0   7-0.56690 3.25832   4
   0  -1   7 15.2309 4.86750   3
  -1   0  -7 17.7832 6.26719   2
   1   0  -7 0.71393 2.83594   3
  -1   0  -7-2.38449 3.29713   3
   0   1  -7 11.8137 4.55874   4
   1   0   7 7.72424 3.88799   4
   1   0  -7 0.24752 2.33388   2
  -1   0   7 6.11007 3.29384   3
  -1   0  -7 8.02160 3.77528   4
   0   1  -7-4.82301 4.16448   2
   0   1  -7-0.66523 2.21303   3
  -1   0  -7 14.4872 4.42211   1
   1   0   7 8.04169 4.54732   3
   0  -1  -7 38.3178 7.93302   2
   0  -1   7-1.78082 2.27056   1
   0  -1   7 11.5875 5.08567   4
   1   0  -7 1.35469 2.99912   4
   1   0   7 3.99646 2.77859   1
   0   1   7-1.22719 2.93619   4
   0   1   7 18.6689 6.32154   1
   0   1   7 5.16064 4.11896   3
   1   0  -7 1.80605 3.95813   2
   0   1  -7 0.12850 2.11029   2
   1   0  -8 0.38972 4.35695   1
   0  -1  -8 1.00734 2.28350   2
   0  -1   8 5.23962 4.54199   4
   0  -1   8 6.93757 4.52954   3
   0   1  -8 3.07396 2.06451   3
   0  -1  -8-3.02154 4.08613   3
   1   0   8-3.63192 2.84764   3
  -1   0   8 3.93486 3.50751   1
   1   0  -8-4.19762 3.99988   4
   0  -1  -8 0.98524 2.77229   4
   1   0   8 0.31770 2.18362   1
   0  -1  -8-2.94920 4.62119   2
   0  -1  -8 8.20239 3.36429   1
   0   1   8-2.38514 2.80144   4
   0  -1   8-1.41382 2.89324   1
   0   1  -8 2.49239 2.04738   1
   0   1  -8 0.58718 3.21344   2
  -1   0   8 3.66986 3.28209   4
   0   1  -8 2.44873 4.14992   4
  -1   0  -8 4.05281 3.06716   1
   1   0   8-0.27562 2.55942   4
   1   0  -8 5.08045 3.19287   3
   0   1   8 0.13171 2.60653   1
   1   0  -8 3.13337 2.95493   2
  -1   0  -8-0.30025 1.80097   2
   0   1  -8 11.3100 4.98969   2
  -1   0  -8-2.50730 3.17331   3
  -1   0   8 2.29829 2.57293   3
  -1   0  -8 2.93762 2.88849   2
   0   1   8 6.06803 4.50510   3
   1   0  -8 5.20341 3.73630   2
  -1   0  -8 8.54455 5.64666   4
   0   1   9-0.67123 5.12710   3
   1   0  -9-1.94736 4.26425   2
   0   1  -9 8.42523 6.36522   4
   0  -1  -9 30.1546 7.44467   4
  -1   0  -9 0.34028 2.97381   2
   1   0  -9-0.50267 3.42629   2
   0  -1  -9-2.68240 3.44166   2
   0   1  -9-0.51003 4.48780   2
   0   1  -9 5.17898 4.52486   2
   1   0   9 7.54381 4.48969   4
  -1   0   9 8.57996 4.98331   1
   1   0  -9 22.5848 6.70326   4
  -1   0  -9 3.72206 3.09020   1
  -1   0  -9 9.65593 5.21431   3
  -1   0  -9 0.16560 4.70778   2
   0   1   9 7.56637 4.16043   1
  -1   0   9 15.2263 6.46145   3
   1   0  -9 3.94387 3.98510   1
   0   1   9-0.47986 4.32302   4
  -1   0  -9 5.48078 4.49929   4
  -1   0   9 2.83743 3.44623   4
   0   1  -9 11.1807 5.00835   1
   0  -1   9-3.03800 2.45315   3
   0  -1  -9 5.85296 4.34091   3
   0  -1   9 11.7265 4.57317   1
   0  -1  -9 10.5679 3.90293   1
   1   0   9 4.56670 3.72142   3
   0  -1   9 4.08164 3.32554   4
   0  -1  -9 8.14272 5.30678   2
   0   1  -9-4.07501 3.78426   3
   1   0   9 0.48415 2.14971   1
   1   0  -9 0.92797 3.01560   3
   1   0 -10 5.25159 4.48364   4
  -1   0 -10 5.95344 4.80097   1
   0  -1  10 3.29122 4.20761   4
   0   1 -10-5.00811 5.21753   4
   0  -1 -10 2.73815 4.59951   3
   1   0 -10 3.65557 5.24275   2
   0  -1 -10 2.66686 3.82250   1
   1   0 -10-0.18756 4.82313   2
   1   0 -10 2.77289 4.84675   3
  -1   0 -10 5.30455 6.48075   4
   0  -1  10-2.10967 2.68932   1
   0   1 -10 6.29121 4.65008   1
   0  -1 -10-6.42637 5.96163   4
   0  -1 -10-0.18795 3.57435   2
   1   0  10-7.68779 5.39693   3
   0  -1  10 2.28413 3.81754   3
   0   1  10 2.24336 5.51646   3
   0   1  10 0.90025 5.01858   4
  -1   0  10 7.92691 5.80214   3
  -1   0 -10 10.1364 6.54085   2
   0   1  10 5.39812 5.37996   1
   1   0  10-0.70797 3.36993   4
   0   1 -10-2.10159 4.07609   2
  -1   0 -10 0.17107 3.04185   3
  -1   0  10 6.05719 4.44521   1
   0   1 -10 2.82504 5.19827   2
  -1   0 -10 2.76066 4.65764   2
   1   0  10 3.56619 4.01896   1
   0   1 -10 5.89455 4.94225   3
   1   0 -10 0.16283 2.70100   1
  -1   0  10 5.70684 4.24428   4
   0  -1 -10 1.45469 3.32381   2
  -1   0  11 11.5433 7.60244   1
   0   1  11 5.95464 4.38244   1
   1   0  11 9.63103 6.33070   4
   0  -1  11 2.56404 3.71142   3
  -1   0  11 6.31969 5.87535   3
   0   1 -11 3.48915 4.25646   3
  -1   0 -11 3.92178 5.09498   4
   0  -1 -11-2.63336 3.77720   3
  -1   0 -11 3.09530 4.42812   1
  -1   0 -11 1.14159 5.06570   3
   1   0 -11 17.2979 6.68182   3
  -1   0 -11-4.67583 5.05715   2
  -1   0 -11 1.84101 4.85635   2
   0  -1 -11 8.23702 5.43167   2
   0  -1 -11 34.4597 10.4922   2
   0  -1  11 11.9708 5.86526   4
   0  -1 -11 11.3101 6.54297   4
   1   0  11 18.9291 6.80667   3
   1   0 -11 1.02128 3.84931   2
   0   1 -11 17.3139 6.83680   1
   1   0 -11-0.17992 4.29045   1
   1   0  11 8.27559 6.53211   1
   0   1 -11 3.37864 3.41074   4
   1   0 -11 26.0449 8.75877   4
   0   1  11-3.20714 3.59532   4
  -1   0  11 0.93681 3.12971   4
   0   1 -11 15.8235 7.01854   2
   0  -1 -11-0.73425 4.33731   1
   1   0 -11 3.33281 4.79605   2
   0  -1  11 8.19422 4.75877   1
   0   1 -11 4.76425 5.61347   2
   0   1  11 3.30797 6.76027   3
   0   1  12-1.37919 4.36796   1
   0  -1  12 8.57761 8.13657   3
  -1   0  12 7.84368 6.00796   3
   1   0 -12-3.75944 4.71087   1
   1   0 -12-2.90040 5.38105   2
   0  -1 -12 3.07783 5.53045   4
   1   0  12 2.38250 6.60325   4
   0   1 -12 4.64018 5.15085   4
   0   1  12-3.39754 6.36977   3
   0  -1  12-6.81595 4.65285   1
   0   1  12 4.82974 6.04374   4
   0  -1  12 11.1058 8.29715   4
   0   1 -12-0.54372 3.37981   1
  -1   0 -12 2.52392 4.80047   3
   0   1 -12 4.41729 5.43749   2
  -1   0 -12-7.62725 5.89802   2
   1   0 -12 7.31511 5.42191   2
   1   0  12 4.77334 5.26716   1
   1   0  12 2.11282 4.86433   3
   0  -1 -12 5.01682 5.15938   2
  -1   0 -12-0.36342 4.06894   1
  -1   0  12 2.91861 5.13194   1
  -1   0  12 6.65278 4.48728   4
  -1   0 -12 4.56769 5.47203   4
   1   0 -12-3.38144 3.27363   4
   0  -1 -12 0.21964 4.98290   2
   0  -1 -12-10.5263 7.37401   3
   0   1 -12 5.69376 7.30419   2
   0   1 -12-2.43554 5.56511   3
  -1   0 -12-2.78590 4.57609   2
   1   0 -12 0.21666 4.18150   3
   0  -1 -12-1.41049 6.03516   1
   1   0 -13 8.61029 7.78114   3
  -1   0  13 15.6642 10.4878   4
   1   0  13 4.54097 5.84230   1
  -1   0  13 4.90892 5.55183   1
  -1   0 -13 1.43877 4.77010   4
   0  -1 -13 3.52952 4.89120   1
   1   0 -13-4.58262 5.84973   1
  -1   0 -13-4.64863 5.57245   3
   0  -1  13 7.92846 6.08429   3
   0   1 -13 5.32584 7.59372   2
   0   1 -13 9.38483 5.70353   1
   0  -1 -13 2.16717 5.46122   2
   0  -1 -13 4.26911 5.74116   2
   0   1 -13 3.73586 4.74719   2
   0  -1 -13-8.45905 7.24556   4
  -1   0 -13 21.5724 9.99382   2
   0   1  13 23.1207 10.4087   3
   0   1 -13 11.0609 6.34553   3
   0  -1  13 4.05664 5.44699   1
  -1   0 -13 2.03556 4.98330   2
  -1   0  13 5.88625 7.51698   3
   0   1 -13 3.00635 6.87457   4
   1   0 -13 3.16910 6.34038   2
  -1   0 -13 7.02116 6.39555   1
   1   0 -13 9.08275 7.02438   4
   0  -1 -13 9.13596 6.89758   3
   1   0  13 14.1495 9.44905   4
   1   0  13 12.7663 8.55877   3
   0   1  13 2.79483 3.63878   1
   0   1  13-0.48482 4.79406   4
  -1   0 -14 3.45802 6.90924   2
   0   1  14 11.1355 9.43817   3
   0   1 -14 10.2339 8.44378   2
   1   0  14 5.81970 6.96215   1
   1   0 -14-0.26528 8.95472   2
   0   1 -14 24.6948 12.5167   2
  -1   0  14 8.17067 6.47960   1
  -1   0 -14-0.27889 5.71342   2
   1   0 -14 9.71538 7.94188   4
  -1   0 -14 8.68967 10.9021   3
   0  -1 -14 5.98545 7.05546   1
   0  -1  14 4.23974 6.11719   3
   1   0 -14 5.71313 8.36384   3
   1   0  14 19.1740 9.68416   3
   0   1 -14-0.76296 6.94606   4
   1   0 -14-0.27392 5.02897   2
   0   1 -14-2.42442 5.61967   4
   0  -1 -14 3.02467 5.79893   2
   1   0 -14 14.5242 9.37521   1
   0  -1 -14-5.30030 5.42115   4
   0  -1 -14 4.43388 7.00441   2
   0   1  14 3.29463 4.15331   1
   1   0  14 8.92653 7.14347   4
   0  -1 -14 3.51794 6.47985   3
  -1   0  14 1.81289 5.27389   3
  -1   0 -14 7.47365 8.21511   1
   0   1 -14-1.74904 6.17658   1
  -1   0 -14 3.94145 4.78215   4
   0  -1  14 17.7906 9.70620   1
   0   1  14 2.11852 6.48453   4
   0   1 -14 9.23668 8.04469   3
   1   0  15 2.23940 6.95964   3
   0   1 -15 12.2989 11.6108   4
   0   1 -15 10.5538 9.26756   2
   1   0  15 12.5383 6.22768   1
  -1   0  15-2.29190 6.21299   1
   0   1  15 9.41428 7.36780   3
   1   0 -15 10.1188 8.18108   4
   0  -1 -15 4.99698 7.92772   3
   0   1 -15 21.6436 12.0180   2
   0   1  15 2.53998 6.51055   1
   0  -1 -15 2.89027 5.24804   4
  -1   0 -15 12.9209 7.22285   1
   0  -1 -15 7.60708 7.73270   2
   0  -1  15 4.09248 6.88568   3
   1   0 -15 9.49712 7.29541   4
   0   1  15 6.32101 8.48339   4
   0   1 -15 12.8534 8.11794   3
   1   0 -15-3.73322 6.99525   2
   1   0 -15 23.1686 11.2455   1
   0  -1 -15-3.25243 6.49098   2
   0   1 -15 9.37821 8.84363   4
   0  -1 -15 4.14808 8.17329   1
  -1   0 -15 8.61290 8.18181   4
  -1   0 -15 11.5569 8.23865   2
   1   0 -15 16.9772 8.53045   2
   0   1 -15 10.5996 7.68505   1
   1   0 -15 3.11331 7.68118   3
  -1   0 -15 68.6924 16.5517   3
  -1   0 -15 47.9631 14.9038   2
  -1   0  15 17.8794 10.3842   3
   1   0  15 4.28354 7.72186   4
   0  -1  15 23.3536 9.45182   1
   0   1 -16 6.38125 12.5088   4
   1   0 -16 19.6525 11.3981   2
   1   0  16 1.53548 7.05398   3
   0   1 -16-0.31790 6.78414   4
   1   0 -16 10.0707 9.58550   4
   0   1 -16 10.6964 8.66241   3
   0  -1 -16 16.6689 11.2829   2
  -1   0 -16 13.7728 9.96283   1
   1   0 -16 37.4406 14.9321   2
   0  -1  16-1.78587 5.17820   3
  -1   0 -16 3.90352 8.07892   2
   0  -1  16 1.00667 7.26090   1
  -1   0  16 0.55394 8.10663   1
   1   0 -16 5.15285 7.54016   4
   0   1  16 9.39546 8.23745   1
   0   1 -16 22.0104 13.4725   2
   1   0 -16 10.2052 10.4592   3
   0   1  16 14.3235 10.8526   4
  -1   0 -16 14.0505 10.0097   4
   0  -1 -16 9.84463 9.30035   1
   1   0  16 9.35856 9.07201   4
   1   0 -16 8.97417 7.97682   1
   1   0  16 0.24884 5.74081   1
   0  -1 -16 6.67148 10.1198   3
   0  -1 -16 10.3794 9.61967   4
  -1   0  16-1.86713 6.26864   3
  -1   0 -16 9.24646 10.4348   2
   0   1 -16 3.42246 8.67314   1
   0   1 -16 3.92309 7.69305   2
  -1   0 -16 3.97929 7.11159   3
   0  -1 -16 11.7171 9.76856   2
   0   1  16 3.84415 6.74669   3
   0   1 -17 19.8991 12.1913   2
   0  -1 -17 22.2493 12.1121   3
   0   1  17 31.7665 15.7758   4
  -1   0 -17 8.56806 9.86507   2
   0   1 -17 8.26778 10.1353   4
   1   0  17 4.85842 8.26264   1
   1   0 -17 19.5295 12.8705   3
   0  -1 -17 16.4538 13.2638   2
  -1   0 -17 5.22119 10.7511   2
  -1   0  17 12.9093 10.5600   1
   0   1 -17 34.5295 13.0620   1
  -1   0 -17 5.95420 10.0673   3
   1   0  17 14.7612 10.5790   3
   0  -1  17 4.69488 8.19388   1
   0  -1 -17 27.7262 15.0814   4
   1   0 -17 11.5913 12.0781   4
   0   1 -17 15.9009 12.2262   2
   1   0 -17 6.92772 10.2981   2
  -1   0 -17 10.3905 10.2800   1
   0  -1 -17 39.8386 14.0142   1
   1   0 -17 30.4936 15.6684   2
  -1   0  17 1.35214 6.93415   3
   0  -1 -17 14.2993 12.4853   2
   0   1  17 21.2684 14.3850   3
   1   0 -17 6.36309 8.13850   1
   0  -1  17 3.24100 11.1098   3
   0   1  17 8.37608 8.37116   1
   0   1 -17 7.76633 10.7906   3
   0   1 -17 12.4026 11.4635   4
  -1   0 -17 11.2459 10.5256   4
  -1   0 -18 4.26016 9.02032   1
   0   1 -18 6.36793 12.8152   3
   0   1 -18 13.8517 13.0546   1
   1   0 -18 4.96123 8.40918   2
   0  -1 -18 7.39003 9.88436   3
   0   1  18-3.77036 9.73207   3
   0  -1  18 14.0852 12.0100   3
  -1   0 -18 1.11993 7.79739   2
   0   1 -18 1.08186 7.90210   2
  -1   0  18 41.2777 15.9500   3
   0  -1  18 11.2060 11.3811   1
   1   0 -18 11.6914 11.4689   3
   0   1 -18 5.96886 9.63465   4
   0  -1 -18 7.75361 10.6363   1
  -1   0 -18-0.38444 7.81915   4
   1   0  18-2.54197 9.83351   3
   1   0 -18 7.15734 11.3267   1
   0   1  18-0.96914 7.61395   1
  -1   0 -18 7.36496 12.7461   4
   1   0 -18 42.8144 15.6218   4
   0  -1 -18 8.28400 9.55242   2
   1   0  18 11.6967 9.86510   1
   1   0 -18 1.11134 7.22769   2
  -1   0 -18 13.7599 12.0328   2
   0  -1 -18 8.79813 9.57791   2
   1   0 -18 0.37484 9.67253   4
   0   1 -18 16.8403 13.8244   4
   0  -1 -18 22.1687 13.6859   4
  -1   0  18 13.5684 10.9054   1
   0   1 -18 5.30650 10.4653   2
  -1   0 -18 20.3446 11.6564   3
   0   1 -19 4.59315 11.6206   2
   0  -1 -19 3.15660 10.0918   2
   0  -1 -19 18.7089 16.7913   3
   0   1 -19 29.5329 14.3911   1
  -1   0  19 1.73871 8.59582   1
  -1   0  19 4.34325 9.88342   3
   0  -1 -19 10.3098 12.6823   4
   1   0 -19 4.55048 10.7147   1
   0   1  19-2.44989 10.3596   3
  -1   0 -19 12.6907 11.6079   1
   0  -1 -19 8.31722 11.0872   1
   0  -1  19 1.99925 9.83418   1
   1   0 -19 15.3275 13.9679   3
   0   1 -19 5.65730 12.6441   2
   1   0  19-13.7262 11.1189   1
  -1   0 -19 1.20713 10.4065   2
   1   0 -19 26.0362 16.6358   2
  -1   0 -19 6.44411 11.2877   2
  -1   0 -19 11.1149 13.0749   4
   1   0 -19 37.1812 17.6915   4
   1   0 -19 61.0402 20.1988   4
   0   1 -19 8.16430 10.5740   4
  -1   0 -19 8.47977 12.9551   3
   0   1 -19 4.85409 10.2370   4
   0  -1  19 37.6500 15.3285   3
   0   1  19-1.04306 8.24808   1
   1   0  19 4.30328 9.07017   3
   0  -1 -19 1.64574 11.6464   4
   0   1 -19 16.1219 12.7643   3
  -1   0 -19 19.7644 15.9256   4
   1   0 -19 1.58047 9.90864   2
   0   1 -20 12.5013 13.8294   1
   0  -1 -20 33.3336 19.9622   3
   1   0 -20 9.16794 14.8524   4
   1   0 -20 9.38763 12.8680   1
   0   1 -20 17.7527 16.5671   3
  -1   0  20 11.0657 13.9247   3
   0  -1 -20 27.6823 18.2946   2
   0   1  20 0.43728 10.3372   3
   1   0  20 1.40095 9.11493   1
  -1   0 -20 18.4272 17.4246   4
   0  -1 -20 26.9579 16.3390   2
   0   1 -20 4.87470 11.5765   2
   0  -1  20 21.3298 17.1811   3
  -1   0 -20 29.0707 16.3750   3
   1   0  20 5.49149 13.5315   3
   0   1 -20 11.3476 15.2487   4
   0  -1 -20 12.5929 12.8909   1
  -1   0  20 7.92709 15.2308   1
   0  -1  20 9.63286 12.3259   1
   1   0 -20 6.30113 13.8551   2
   0   1  20 2.97950 11.9999   1
   0  -1 -20 7.46073 14.6432   4
   0   1 -20 20.1687 15.6839   4
   0  -1 -20 6.35827 13.2614   4
   1   0 -20-2.40510 11.8252   2
  -1   0 -20 9.09160 12.3411   1
  -1   0 -20 2.81747 13.1383   2
  -1   0 -20 5.09724 12.0692   4
   0   1 -20 3.85886 15.9220   2
   1   0 -20 9.70213 14.8688   3
  -1   0 -20 4.30752 13.6756   2
   1   0 -20 13.4937 17.0278   4
   1   0 -21 0.44626 11.2577   2
  -1   0 -21 5.49226 14.4623   2
  -1   0 -21 2.61355 12.0736   1
   0   1 -21 2.26720 14.4661   4
   0  -1  21 21.1778 15.4403   3
   1   0 -21 8.00258 13.3367   1
   0   1  21 1.40532 15.4517   3
   1   0  21 12.2169 16.4682   3
   0   1  21 11.9784 16.6146   1
  -1   0 -21 8.94323 16.2645   2
  -1   0 -21 18.7137 16.3684   3
   1   0 -21 4.53087 13.0285   3
  -1   0  21 12.3084 17.6626   3
   1   0 -21 13.1174 16.9040   4
   0   1 -21 20.0407 15.2057   4
   0  -1 -21 0.39457 11.9105   1
   0   1 -21 21.7058 17.8370   3
  -1   0 -21 5.62963 15.8870   4
   0  -1 -21 14.0231 14.4463   4
   0  -1 -21 51.6172 21.1384   2
   0   1 -21 22.3653 18.0146   2
  -1   0 -21 38.9786 22.6955   4
   0   1 -21 6.89472 14.7578   1
   0  -1  21 4.94249 14.6463   1
   1   0 -21 1.27021 13.6055   2
  -1   0  21-0.41131 12.2309   1
   1   0  21 1.13154 13.7707   1
   1   0 -21 9.07563 14.5395   4
   0  -1 -21 4.44970 11.8169   2
   0  -1 -21 18.2705 16.2751   3
   0  -1 -21 23.9626 18.2846   4
   0  -1 -22-1.24425 14.4248   1
   1   0 -22 17.4267 20.3758   4
   0  -1 -22 4.85505 16.7774   3
  -1   0 -22 39.0224 24.7771   3
   1   0  22-0.79956 12.7503   1
   1   0 -22 10.8506 16.5824   2
   0   1  22 33.4621 24.2036   3
   0  -1  22 16.5911 18.1813   1
   1   0 -22 4.86403 16.6682   3
   1   0 -22 3.45686 17.6228   4
   0  -1 -22 13.6515 19.5885   2
   1   0  22 0.96537 16.6639   3
   0  -1 -22 0.48140 16.7736   4
   1   0 -22 4.28601 17.8479   2
   0  -1 -22 8.98572 20.6251   4
   0   1 -22 0.95077 16.6767   3
  -1   0  22 18.5728 24.6531   3
   0   1 -22 22.4279 16.8823   1
  -1   0 -22 5.30687 15.2930   4
  -1   0 -22 34.6390 20.7834   2
   1   0 -22 15.4326 16.8782   1
  -1   0 -22 11.5605 19.1880   2
   0   1  22 2.59683 15.2596   1
   0   1 -22 56.6799 25.2128   2
  -1   0 -22 1.00432 17.6080   4
   0   1 -22 17.3449 20.9183   4
  -1   0  22 14.9604 17.3661   1
   0  -1 -22 26.0432 18.7442   2
   0  -1  22 4.74273 17.2719   3
   0   1 -22 10.7004 18.1878   2
  -1  -1   0 87.4924 4.46610   3
   1  -1   0 80.5513 4.34057   1
  -1  -1   0 105.816 5.40948   4
  -1  -1   0 86.6275 4.08557   1
  -1  -1   0 76.8479 4.73289   2
  -1  -1   1 2.38234 0.73645   4
   1  -1  -1 4.43155 2.24950   1
  -1  -1   1 0.16009 0.96492   2
  -1  -1  -1 0.10379 0.64825   1
   1   1  -1 0.81754 0.92732   1
  -1  -1  -1 2.34868 1.40352   4
  -1   1  -1 0.36542 0.61936   2
   1  -1   1 5.60477 1.10616   1
  -1  -1  -1 1.28941 0.83433   2
  -1  -1   1-0.20882 0.79945   3
   1  -1  -1-0.47626 1.61172   3
   1  -1  -1 1.20414 0.58064   4
  -1  -1  -1 3.19466 1.65491   3
   1  -1   2 197.945 7.55739   3
  -1   1  -2 226.133 9.93342   2
   1  -1  -2 158.897 9.40559   3
  -1  -1   2 196.818 8.94971   4
  -1  -1  -2 189.318 8.65818   1
  -1   1   2 197.689 8.94926   2
   1  -1  -2 207.168 9.31823   4
   1   1   2 168.060 8.66561   1
  -1  -1   2 214.624 9.81813   2
  -1  -1  -2 204.449 10.6592   3
  -1   1  -2 179.617 7.97603   4
  -1   1  -2 198.148 7.65175   3
   1   1  -2 201.511 8.88987   1
   1  -1  -2 201.725 11.2625   1
   1  -1   2 153.917 5.99524   1
   1   1  -2 152.077 8.00368   3
  -1  -1  -2 176.484 9.92688   4
  -1  -1  -2 160.084 8.80011   2
  -1   1  -2 229.414 7.26720   1
   1   1  -3-1.60477 1.02082   2
  -1   1   3 2.94496 1.13279   4
  -1   1  -3-0.61235 0.93392   3
  -1  -1  -3 0.12734 2.19976   4
  -1  -1   3 1.59796 1.27745   2
   1   1   3 4.12781 2.91528   4
   1   1  -3-1.50369 1.96250   3
   1   1  -3-1.00623 1.51145   4
  -1  -1   3 2.66412 1.55441   1
  -1   1  -3-4.09952 2.87279   2
   1  -1  -3 6.73473 3.79729   3
   1   1   3 2.11608 0.99235   2
   1   1   3-1.15344 1.62775   3
   1  -1   3 0.60253 1.08773   2
  -1  -1  -3-3.04157 3.26139   3
   1  -1  -3 0.05306 1.62773   2
  -1   1   3 3.86995 2.12088   3
  -1  -1  -3-0.54717 2.51775   2
   1   1   3 1.77052 1.37929   1
  -1   1   3 0.58603 2.18870   1
   1   1  -3 7.22345 2.97053   1
  -1   1  -3-0.50781 1.06251   4
  -1   1  -3-1.12617 0.59420   1
   1  -1  -3-0.52092 1.13727   1
   1  -1  -3 0.40609 1.59789   4
   1  -1   3 4.98911 2.16264   4
   1  -1   3 0.63167 1.52616   3
  -1  -1   3-0.57369 1.55990   3
   1  -1   3 0.32476 0.84351   1
  -1  -1  -3-0.19518 1.83893   1
   1   1  -4 327.966 16.6133   2
  -1  -1  -4 295.513 16.4462   3
   1   1  -4 278.976 14.1796   3
  -1  -1  -4 300.782 16.5736   4
  -1   1  -4 294.563 14.5502   4
  -1  -1   4 361.240 16.0362   1
  -1   1  -4 306.373 16.0327   2
  -1   1  -4 277.271 11.7298   1
   1   1   4 287.100 16.5207   4
  -1   1   4 288.192 15.1579   4
  -1  -1  -4 256.208 13.9432   1
  -1  -1   4 246.709 13.8081   3
   1  -1  -4 294.403 16.7193   3
   1   1   4 318.387 16.9259   3
  -1   1   4 304.709 16.8217   3
  -1   1  -4 275.598 15.5841   2
   1   1  -4 361.465 16.8115   4
   1  -1   4 237.518 13.2431   4
   1   1  -4 271.325 14.0785   4
  -1  -1  -4 318.725 16.1621   2
   1   1   4 260.998 14.8693   2
  -1   1   4 290.251 16.1387   1
   1  -1  -4 303.422 16.6392   1
   1  -1  -4 336.361 16.8636   2
   1  -1   4 318.263 14.2664   3
   1  -1   4 322.344 12.4315   1
   1  -1  -4 282.282 14.8918   4
  -1   1  -4 280.583 13.5541   3
  -1  -1   4 283.858 15.6968   2
   1   1  -4 252.911 13.1833   1
   1  -1  -4 262.576 14.4077   2
   1   1   4 291.489 14.8965   1
  -1   1  -5 7.57002 3.93625   4
  -1  -1  -5 3.02012 2.11739   1
   1  -1  -5 3.35867 2.95853   4
   1   1  -5-1.84063 2.65034   4
  -1   1  -5 7.43796 3.24498   1
  -1  -1   5-2.43952 2.40113   1
   1   1  -5 0.63855 1.32826   3
  -1   1  -5-1.48128 2.59113   2
   1  -1   5 1.48547 1.36739   1
   1   1   5 2.18893 1.81426   4
   1  -1  -5 2.16366 2.91717   1
   1  -1   5 0.23601 1.63146   4
   1   1   5 2.35313 1.78916   3
  -1  -1   5-2.21367 1.95153   2
  -1   1   5 5.89163 3.69065   3
   1  -1  -5-0.37455 2.16303   3
  -1   1   5 2.00843 2.77957   1
  -1   1  -5 1.39986 2.58097   3
   1  -1   5 2.36891 2.08901   3
   1   1  -5 1.84568 2.63922   1
   1  -1  -5 0.71800 2.35286   2
  -1  -1  -5-0.09448 1.95074   4
  -1  -1  -5 2.15908 2.55192   2
  -1  -1  -5 3.21566 3.50860   3
  -1  -1   5 3.01007 2.33183   3
   1   1  -5 0.23771 2.37789   4
  -1   1   5 0.08371 1.94293   4
  -1   1  -5 6.47385 3.21706   2
   1   1   5 9.58865 4.20484   2
   1  -1  -5 12.9150 4.61218   2
   1   1  -5 4.67271 2.91486   2
   1   1   5-0.85518 2.53476   1
   1  -1   6 167.958 13.4200   3
   1  -1  -6 163.443 14.2330   2
   1  -1  -6 172.740 14.4320   4
  -1   1  -6 180.707 15.6392   2
  -1   1   6 178.034 15.5059   1
  -1  -1   6 194.473 15.4611   2
   1  -1  -6 194.514 15.9837   1
   1  -1   6 140.858 10.7791   1
  -1   1   6 150.462 13.9972   3
  -1  -1   6 167.705 13.7414   3
   1   1   6 175.214 15.2106   2
   1  -1   6 141.406 12.7243   4
  -1   1  -6 172.856 12.3507   1
  -1   1  -6 155.443 13.2409   3
   1   1  -6 160.148 13.4172   4
   1  -1  -6 185.796 15.6823   3
  -1  -1  -6 159.566 14.5830   3
  -1   1   6 192.123 15.0684   4
   1   1   6 134.849 13.4561   4
   1   1   6 170.922 15.0159   3
  -1   1  -6 141.226 12.8369   4
   1   1   6 166.639 13.3747   1
   1   1  -6 187.080 14.1895   1
  -1  -1  -6 178.387 13.9265   1
  -1   1  -6 178.618 15.0478   2
   1   1  -6 186.873 14.9006   3
   1   1  -6 175.675 14.6968   4
  -1  -1   6 154.287 13.1087   1
  -1  -1  -6 176.794 14.7657   2
  -1  -1  -6 155.858 14.2120   4
   1   1  -6 159.803 14.6298   2
   1  -1  -6 166.758 15.0261   2
  -1   1  -7 1.42411 2.69118   2
  -1  -1   7 2.11583 2.22181   2
  -1   1   7 7.13474 4.60638   4
  -1   1  -7 1.71522 3.40708   3
   1  -1   7 0.52790 1.49635   3
  -1  -1   7 3.62762 2.60994   1
   1   1   7 6.11415 3.25272   1
   1  -1  -7 1.48223 2.56034   2
   1  -1   7 2.12852 2.27367   4
  -1  -1  -7 12.0107 6.09823   3
  -1  -1  -7 0.37894 2.82434   2
  -1   1  -7 0.11375 2.49126   4
  -1   1  -7 2.74912 2.43008   2
  -1   1   7-2.78227 1.94993   1
  -1  -1   7 4.15555 3.15044   3
   1   1   7 2.81340 4.15401   4
   1  -1  -7-1.19810 2.43029   4
  -1   1   7 0.64554 3.50093   3
  -1   1  -7 1.88539 2.71327   1
   1   1   7 7.23897 3.54243   2
  -1  -1  -7 10.3016 5.54393   1
   1   1  -7 2.46084 2.39873   4
   1  -1   7 1.66992 2.54056   1
   1  -1  -7 3.93158 3.00117   2
   1   1  -7-0.10560 1.85666   1
   1  -1  -7 0.64534 3.14674   3
  -1  -1  -7 5.35304 3.30875   4
   1   1   7 3.24752 4.00962   3
   1   1  -7 0.34189 2.16603   3
   1  -1  -7 8.60615 4.65600   1
   1   1  -7-4.70088 4.37232   2
   1   1   8 7.03376 3.80052   2
  -1   1   8 4.37332 3.20604   1
  -1  -1  -8 0.14524 3.57829   4
  -1   1  -8 11.6438 5.90680   2
   1  -1  -8 7.89321 5.57873   2
   1  -1  -8 3.40730 4.28531   3
   1  -1   8 15.5089 4.86951   3
   1  -1  -8 21.1512 5.96926   4
   1  -1   8 1.67116 2.29302   1
  -1   1  -8 5.49592 3.77606   2
   1   1  -8 6.43442 4.63913   2
  -1  -1  -8 6.12068 4.82660   3
  -1   1  -8 5.96878 3.24085   3
   1   1   8-1.09109 2.21854   1
   1   1  -8 2.54957 3.00753   1
  -1  -1  -8-3.04109 4.10670   2
   1   1  -8 1.18846 3.72465   3
   1   1   8 5.48262 3.59007   3
   1   1   8 20.2059 6.17394   4
   1  -1  -8 9.89622 4.32406   1
  -1   1   8-0.96427 2.86546   4
  -1  -1  -8 2.20085 4.01837   1
  -1   1   8 2.07230 3.54381   3
  -1  -1   8 4.87465 4.46508   1
  -1   1  -8 0.10577 2.29358   1
   1  -1  -8 8.26796 4.42161   2
   1   1  -8 6.95052 3.84234   4
  -1   1  -8 1.84337 2.92925   4
   1  -1   8 1.94709 2.59775   4
  -1  -1   8 7.25903 4.20637   3
   1   1   9-5.03782 5.23321   3
   1   1  -9 14.0799 5.51853   1
  -1  -1   9-2.50641 3.92297   3
   1   1  -9-0.29872 3.72816   3
   1  -1   9 3.27962 3.50293   4
  -1   1   9 2.21993 2.84939   1
  -1   1  -9-3.70272 4.45364   2
  -1  -1  -9 1.52251 4.19451   2
  -1   1   9 8.32054 6.12941   3
   1   1   9-0.33045 4.55606   4
  -1   1  -9 2.44057 3.03580   1
   1  -1  -9 8.51590 5.83705   3
  -1   1  -9 0.60907 2.46151   4
  -1   1   9-1.09437 2.87618   4
  -1  -1  -9-2.61960 3.84884   4
   1  -1  -9-2.60080 4.11638   2
   1  -1  -9 9.49810 7.13712   4
  -1   1  -9 2.71588 3.42119   3
   1   1  -9 2.00053 3.17855   2
   1   1   9 2.60914 4.33551   1
  -1   1  -9 2.05596 3.93232   2
  -1  -1  -9 1.63417 3.99116   2
   1   1  -9 12.6101 5.95430   4
   1  -1  -9-1.66099 4.24688   2
   1  -1  -9-0.31660 2.69076   1
   1   1  -9 6.39739 5.54248   2
  -1  -1  -9 4.53094 3.52494   3
   1  -1   9 1.55070 2.40586   3
   1  -1   9 9.22040 4.54088   1
  -1  -1  -9 3.46802 4.04957   1
  -1  -1   9-1.21603 2.69139   1
   1   1  10 220.289 21.1941   4
  -1   1 -10 196.712 20.1652   2
  -1  -1 -10 211.748 21.8940   2
  -1  -1  10 198.879 20.4518   3
  -1  -1 -10 246.520 20.7500   1
  -1   1 -10 165.023 17.8638   3
  -1   1  10 197.012 20.3438   4
   1  -1 -10 168.024 18.7998   2
   1  -1 -10 191.911 20.0558   4
   1   1  10 187.996 20.5838   3
   1  -1  10 201.783 19.5988   3
  -1  -1  10 197.134 18.8617   1
   1  -1 -10 224.965 21.6246   3
   1  -1  10 208.095 20.8404   4
   1   1 -10 215.194 21.9344   2
   1   1 -10 210.522 20.1015   4
   1   1 -10 226.049 20.9975   3
   1   1 -10 214.534 19.5656   1
  -1  -1 -10 200.441 21.4603   3
   1  -1 -10 176.696 18.9315   1
  -1  -1 -10 220.257 21.2626   4
  -1  -1 -10 144.588 17.5134   2
   1   1 -10 220.680 21.7614   2
  -1   1  10 205.083 20.3952   1
   1  -1  10 216.712 18.0120   1
  -1   1 -10 226.091 19.3899   1
  -1   1 -10 190.748 20.6747   2
   1   1 -10 198.221 20.8877   4
  -1   1  10 252.420 22.9280   3
  -1   1 -10 206.406 20.2138   4
   1  -1 -10 217.586 21.1502   2
   1   1  10 187.703 18.4840   1
  -1   1 -11 0.77537 5.39316   1
  -1  -1 -11 6.85531 7.14995   2
   1  -1 -11 6.02128 6.62312   1
  -1  -1 -11 13.3442 8.25099   3
   1   1 -11 2.51249 7.55850   2
   1  -1 -11 2.15037 4.94801   4
   1  -1 -11 0.62569 3.60816   2
  -1  -1  11 4.04826 4.75026   1
   1   1  11 2.87698 4.64181   4
  -1  -1 -11-1.90268 4.60392   1
  -1   1 -11-3.25146 4.87611   3
   1   1 -11-1.02706 5.19580   2
   1   1 -11 0.59871 4.02257   4
   1   1 -11 4.30923 6.26619   3
  -1   1  11 6.51257 5.13331   1
   1  -1  11 8.64946 6.54872   3
   1  -1 -11 6.55885 5.53992   3
   1   1  11 3.54235 5.19961   3
  -1   1 -11-1.14894 4.40697   4
  -1  -1 -11 2.64553 3.98700   4
   1   1 -11 2.56779 5.72955   1
  -1   1 -11-4.87739 5.80478   2
   1  -1  11 3.00921 5.92066   4
  -1  -1 -11 2.73459 3.78045   2
  -1  -1  11 4.30225 3.20723   3
   1  -1  11 2.76716 5.09563   1
  -1   1 -11 7.52235 6.33980   2
  -1   1  11-0.58179 3.98290   4
  -1   1  11-1.43756 4.95511   3
   1   1  11 11.7889 5.96833   1
   1   1 -11-4.08135 3.73005   4
   1  -1 -11 14.5856 7.29150   2
  -1   1 -12 51.4781 13.4515   2
   1   1 -12 39.2110 9.88135   1
   1  -1 -12 33.9896 10.4743   3
  -1  -1 -12 76.5525 13.1497   1
   1  -1  12 39.4149 9.87304   1
   1   1  12 31.6912 10.3210   4
  -1   1 -12 27.3180 10.0394   2
   1  -1  12 40.4314 10.0086   4
  -1  -1 -12 45.3191 11.8681   3
  -1  -1  12 58.2568 11.9374   1
   1  -1 -12 42.2006 10.7242   2
  -1   1 -12 40.1696 9.68153   1
  -1   1  12 34.9376 9.83138   4
  -1   1 -12 58.0738 11.6302   4
   1   1  12 36.1637 8.78449   1
   1  -1  12 24.5303 7.24485   3
   1   1 -12 35.0929 9.43812   3
  -1  -1 -12 60.4733 13.1677   4
   1   1 -12 31.4684 9.97405   4
  -1  -1 -12 50.6243 13.0978   2
   1   1 -12 40.4631 10.3560   2
  -1   1  12 42.4170 11.5512   3
  -1   1 -12 43.5555 10.8428   3
   1  -1 -12 22.3480 8.16992   2
  -1  -1 -12 34.3567 9.06304   2
  -1   1  12 45.5709 11.0191   1
   1  -1 -12 34.1842 9.31650   4
   1   1 -12 16.0628 6.20829   4
   1   1  12 29.7454 9.60989   3
   1   1 -12 61.0327 13.8905   2
   1  -1 -12 43.1786 11.6994   1
  -1  -1  12 27.7625 9.22490   3
  -1   1  13 2.13349 4.98924   4
   1  -1 -13 16.3483 10.1960   1
  -1   1 -13 6.30145 8.25357   1
   1   1 -13 5.22246 6.58358   3
  -1   1 -13 2.01963 6.18416   3
   1  -1  13 6.21671 6.60610   4
  -1  -1 -13 3.46268 6.84171   4
   1  -1  13 2.67755 6.63521   3
   1   1  13-0.20249 4.16150   1
   1   1 -13-1.70298 4.56397   4
   1  -1 -13 3.23374 5.89323   3
   1  -1 -13-1.43114 6.49183   4
  -1  -1 -13 0.97939 6.87046   3
  -1   1 -13-10.1968 6.75184   2
  -1  -1 -13-5.23664 4.90252   1
  -1   1 -13-0.77852 5.81339   2
   1   1 -13 5.06888 6.53754   4
  -1  -1  13 3.89675 6.16627   1
   1  -1 -13-6.01846 5.94537   2
   1  -1  13 17.6656 6.53057   1
  -1   1  13 13.4025 8.66087   1
   1  -1 -13 1.49372 4.96078   2
   1   1  13 8.71247 8.03400   4
  -1  -1 -13-3.53574 4.93176   2
   1   1 -13 1.27175 5.23575   2
   1   1 -13 20.8646 10.0277   1
   1   1 -13-1.24424 4.06152   2
  -1   1 -13-4.95243 5.21643   4
   1   1  13 4.48498 6.81542   3
  -1  -1 -13 13.2818 9.06000   2
  -1   1  13-0.24781 7.85343   3
  -1  -1  13 7.55388 5.80794   3
   1  -1  14 80.6096 15.6188   3
  -1   1 -14 33.9962 11.3535   4
   1  -1  14 77.8130 16.2182   4
  -1  -1 -14 46.6933 13.6457   4
   1  -1 -14 34.5205 13.0180   1
  -1   1  14 49.6233 13.3540   4
   1   1  14 48.1959 12.3029   1
   1   1 -14 56.6428 13.5229   4
  -1  -1 -14 72.3602 15.7733   2
   1  -1 -14 43.9005 12.6202   3
  -1  -1 -14 65.4819 15.0441   1
  -1  -1 -14 41.3855 12.8453   2
  -1   1 -14 69.4638 15.6121   3
   1  -1 -14 38.8086 12.0966   2
  -1   1 -14 46.1852 11.3783   1
   1   1 -14 43.7001 12.4708   1
   1   1 -14 45.3912 14.5370   2
  -1  -1 -14 63.7959 15.7396   3
   1  -1  14 47.8067 11.7676   1
   1  -1 -14 79.2453 16.6796   4
  -1   1 -14 45.8141 13.4029   2
   1   1 -14 62.7577 13.3676   3
  -1  -1  14 39.8012 10.6993   1
   1   1 -14 61.2027 14.9008   2
   1   1  14 53.2437 14.4755   4
   1   1  14 49.8816 14.3752   3
  -1  -1  14 93.3995 17.4638   3
  -1   1  14 53.0969 14.1402   1
   1   1 -14 55.3189 12.7804   4
  -1   1 -14 55.9102 14.5688   2
  -1   1  14 57.9766 14.7920   3
   1  -1 -14 65.7092 15.1979   2
   1  -1 -15 7.13607 9.18635   4
   1   1 -15 1.45136 6.68770   4
  -1   1  15 9.29175 8.70185   4
  -1  -1 -15 14.9664 9.05229   1
   1   1  15 8.27137 8.08749   4
  -1   1 -15 10.4378 8.09642   1
   1  -1 -15 6.74511 6.50359   1
   1  -1  15 3.25985 5.69561   1
   1   1 -15 2.33675 7.26986   2
   1   1 -15-5.98034 5.44410   1
   1  -1  15 0.54202 4.73844   3
  -1  -1 -15 11.8838 10.6268   3
  -1   1 -15-3.80647 7.24730   2
  -1   1 -15 7.55357 9.06737   3
   1  -1 -15 13.9693 10.8359   3
  -1   1 -15 12.4313 8.47200   4
   1   1 -15 16.5893 10.6194   4
   1   1  15 4.72619 8.13679   3
  -1  -1 -15 19.9629 11.1307   2
  -1  -1  15 13.4705 9.17701   3
  -1  -1  15-2.20013 4.87172   1
   1  -1 -15 3.20998 7.67957   2
   1   1 -15-0.55253 8.44911   3
  -1   1  15 5.61216 7.88709   1
   1  -1 -15 34.0624 13.5081   2
  -1  -1 -15 0.89627 8.26447   2
   1   1  15-4.57451 5.24104   1
   1   1 -15 1.20503 8.27969   2
  -1  -1 -15 0.88624 6.59300   4
  -1   1  15-4.39988 7.38211   3
  -1   1 -15 16.1368 8.70350   2
   1  -1  16 24.1702 11.1104   3
  -1  -1  16 24.4567 10.0753   1
  -1   1 -16 27.8186 11.5680   2
   1   1  16 31.3215 14.3375   4
  -1  -1 -16 26.7291 12.3877   3
  -1  -1 -16 33.0847 11.7313   1
  -1   1 -16 20.9080 11.5831   4
   1   1 -16 72.9944 17.9216   4
   1   1 -16 37.5518 12.6909   1
  -1  -1 -16 24.9390 11.5053   2
  -1   1 -16 70.1826 17.4492   3
  -1   1 -16 19.3880 10.4390   4
  -1   1  16 18.9239 10.4091   3
   1  -1 -16 37.9463 12.5893   2
  -1  -1 -16 32.6580 12.0705   2
  -1  -1  16 41.4207 14.0878   3
   1  -1 -16 37.4868 13.0333   1
   1   1  16 33.1831 13.7708   3
  -1  -1 -16 34.5809 11.6093   4
   1  -1  16 44.3920 13.6616   1
   1   1  16 34.1905 12.7127   1
  -1   1 -16 50.4203 15.8838   2
   1   1 -16 36.0550 13.1325   4
   1  -1 -16 22.7188 10.8038   2
  -1   1  16 20.5151 8.86147   1
   1   1 -16 50.2500 14.4294   2
   1  -1 -16 43.4270 16.0375   3
   1   1 -16 35.6796 13.6190   2
   1  -1 -16 23.6241 10.1061   4
   1   1 -16 56.3422 15.9851   3
  -1   1 -16 31.3015 10.6031   1
   1  -1 -17 11.7802 11.0305   3
  -1   1 -17 12.9280 10.7835   3
   1  -1 -17 7.08824 10.2791   4
   1   1  17 10.5460 9.29080   1
   1  -1 -17 36.7295 15.0463   4
   1   1 -17 5.87167 9.45876   3
   1   1 -17 11.4680 11.6724   4
  -1   1  17 6.58062 10.4053   1
  -1   1 -17-1.40912 8.26882   2
   1   1 -17 15.7195 12.1157   1
   1   1 -17 19.6051 12.1476   2
  -1   1 -17 3.68094 9.56515   4
   1   1  17-1.38934 6.23435   3
  -1   1 -17 0.34891 8.48072   4
  -1   1 -17 32.9544 14.9392   2
   1   1 -17 2.09267 7.88604   2
  -1   1  17 7.68917 9.36315   3
   1   1 -17-1.72304 8.39398   4
   1  -1 -17-1.71086 7.53435   2
   1  -1 -17 10.3536 9.87007   1
  -1  -1 -17 8.09875 11.2418   1
  -1  -1  17-2.31121 7.08248   1
  -1  -1 -17-1.03810 7.92528   2
  -1  -1 -17 18.6763 14.4960   3
  -1  -1  17 3.92180 8.72773   3
  -1   1 -17 4.11914 8.01637   1
  -1  -1 -17 3.59491 9.56921   2
  -1  -1 -17 15.5296 12.0252   4
   1  -1  17 4.50250 9.44083   3
   1  -1 -17 23.7050 13.5155   2
   1  -1  17 2.64295 7.24120   1
   1   1  17-1.71932 7.15519   4
   1   1  18 30.8254 12.9221   1
  -1  -1 -18 48.7901 18.2826   3
  -1  -1 -18 52.5853 16.9974   2
   1   1 -18 21.3359 13.6392   3
   1   1 -18 31.0510 14.1254   4
  -1   1 -18 18.3769 14.3800   4
   1  -1  18 15.7168 10.9064   3
  -1   1 -18 48.4093 16.3342   2
   1   1 -18 25.3053 14.0747   2
   1   1  18 44.8698 19.1296   3
   1  -1 -18 29.2881 13.8349   4
   1   1 -18 30.5991 13.0145   1
   1  -1 -18 67.1116 18.6736   4
   1  -1 -18 31.6611 15.5454   3
  -1   1 -18 41.6981 16.9550   4
  -1   1  18 22.6196 12.4487   1
  -1  -1 -18 31.6941 13.2040   2
  -1  -1 -18 60.1080 17.6147   4
   1  -1 -18 52.8449 19.4178   2
  -1   1 -18 49.9277 17.3476   3
  -1   1 -18 57.6702 15.8545   1
  -1   1  18 42.0195 16.7553   3
   1   1 -18 24.2816 15.7435   2
   1  -1  18 42.8023 14.1087   1
   1   1  18 57.2980 18.0475   4
   1   1 -18 39.9369 16.7542   4
   1  -1 -18 24.8199 13.4652   1
  -1   1 -18 30.1165 15.4912   2
  -1  -1  18 8.80879 9.31453   1
   1  -1 -18 28.5287 12.8376   2
  -1  -1  18 37.9029 15.1232   3
  -1  -1 -18 47.0237 16.7685   1
   1   1  19 0.81391 12.5579   3
  -1  -1 -19 10.6744 12.2661   1
   1   1 -19 0.39998 8.57035   2
  -1   1  19 4.90844 9.98818   3
   1   1 -19 14.6455 12.1238   2
   1   1  19 5.29243 9.94647   1
   1  -1 -19 12.4291 12.9319   3
  -1  -1  19 9.94827 12.9806   3
  -1   1 -19 6.88287 14.6712   4
   1  -1  19 12.4573 13.8424   3
   1  -1 -19 9.79058 12.1991   2
  -1  -1 -19 13.9114 15.9259   4
  -1   1  19-1.08964 9.54250   1
  -1  -1 -19 30.3949 18.6298   3
  -1   1 -19 2.36661 10.2888   4
  -1  -1 -19 3.72859 10.2653   2
   1   1 -19 2.40737 9.83650   1
  -1   1 -19 7.36892 13.9451   2
  -1   1 -19 1.59771 9.29898   1
   1   1 -19 12.1429 11.1626   4
   1  -1 -19 16.1123 14.3665   1
   1  -1 -19 13.4388 14.4530   4
  -1  -1 -19 2.75720 10.6973   2
   1  -1 -19 3.65472 11.1512   4
   1   1 -19 46.9355 19.5337   3
   1  -1 -19 8.84103 12.0657   2
  -1   1 -19 11.3938 12.4728   3
  -1  -1  19-0.69072 7.97617   1
   1   1 -19 19.6792 13.1930   4
  -1   1 -19 25.2471 15.8169   2
   1  -1  19 5.02084 12.8585   1
  -1  -1 -20 50.2486 19.7966   2
   1   1 -20 29.2560 16.9690   4
  -1   1 -20 31.5723 15.6208   2
   1   1  20 35.8658 18.4494   3
  -1   1 -20 62.4985 19.7244   1
  -1  -1 -20 39.4975 18.6165   4
   1   1 -20 28.8615 17.6921   3
  -1  -1 -20 25.3819 18.3811   3
  -1  -1 -20 21.1597 15.6588   2
   1  -1  20 12.0915 11.1923   1
   1  -1 -20 61.9680 19.6964   2
  -1  -1  20 53.4271 19.7610   3
   1   1 -20 37.9519 18.0412   2
  -1   1 -20 65.9506 22.9344   4
  -1   1 -20 6.55737 11.4171   4
  -1   1  20 37.9935 15.8873   1
   1  -1 -20 34.4630 18.4315   3
  -1  -1  20 73.1091 20.6462   1
  -1   1  20 102.008 28.8667   3
  -1   1 -20 37.9869 18.3474   2
  -1  -1 -20 13.9266 12.4345   1
   1  -1 -20 52.2419 20.8061   4
   1   1  20 20.2551 13.1275   1
   1   1 -20 51.1520 18.5251   2
   1   1 -20 61.9829 18.6389   1
   1   1 -20 43.3528 18.9921   4
   1  -1  20 17.4911 12.9141   3
  -1  -1 -20 25.0080 16.9372   4
   1  -1 -20 28.1959 15.0496   2
  -1   1 -20 39.1602 18.2419   3
   1  -1 -20 28.0781 15.2759   1
   1  -1 -20 25.8830 16.6296   4
   1   1 -21 9.69731 17.0072   4
   1  -1  21 19.4655 14.4697   1
   1  -1 -21 7.70409 17.0391   4
  -1  -1 -21 19.4184 18.7538   3
  -1   1  21 9.37042 16.5686   3
   1  -1  21 12.7204 16.4976   3
  -1  -1 -21 12.1988 16.8532   2
  -1  -1  21 9.59606 14.8507   1
   1   1 -21 1.58948 12.5603   1
  -1   1 -21 0.92199 13.7450   2
  -1  -1 -21 17.6733 15.1722   1
   1   1 -21 13.0118 16.3637   3
   1   1  21 1.15274 12.7223   1
   1   1 -21 9.91547 17.2613   4
  -1   1 -21 11.3776 16.3476   4
  -1  -1 -21 87.2856 31.3146   4
  -1   1 -21 15.4988 17.5594   4
  -1   1 -21 2.63384 12.6319   3
   1   1 -21 9.10062 15.3472   2
  -1  -1  21 7.99551 15.7408   3
  -1   1 -21 6.62235 13.2579   1
  -1   1  21 12.8257 17.3777   1
   1  -1 -21 7.03445 16.1565   2
  -1   1 -21 16.5739 15.9676   2
  -1  -1 -21 0.45164 14.6443   2
   1  -1 -21 7.75442 15.4588   1
   1   1 -21 3.20684 17.2298   2
   1   1  21 8.39421 14.8526   3
   1  -1 -21 8.39873 16.1904   4
   1   1 -22 17.0019 17.2854   2
  -1   1 -22 9.20682 17.0379   4
   1   1 -22 2.28208 15.8919   2
  -1  -1 -22 14.8357 18.8955   2
   1   1 -22 12.9789 15.7564   3
   1   1 -22 47.3295 19.7303   1
   1  -1 -22 17.9366 20.5915   4
  -1   1 -22 6.41002 15.4403   2
   1  -1 -22 2.32722 14.7078   2
  -1  -1 -22 12.9822 16.6581   2
  -1  -1 -22 25.9974 20.3541   1
   1  -1 -22 48.2013 25.8326   3
  -1   1  22-0.88939 15.5198   1
   1  -1 -22 4.46007 16.6078   2
  -1  -1  22 33.9122 21.0485   3
   1  -1  22 1.41035 16.0026   3
  -1   1 -22 21.2264 19.3606   3
  -1  -1 -22 2.87915 18.8856   3
  -1  -1 -22-1.00087 16.0296   4
  -1   1  22 6.99668 15.5547   3
   1   1  22 32.9369 19.2439   1
   1   1 -22 45.4814 22.6365   4
  -1   1 -22 5.50711 16.3119   1
   1   1  22 2.98929 17.0820   3
  -1  -1 -22 11.5055 19.9985   4
  -1   1 -22 6.99541 15.5933   4
   1   1 -22 4.85304 19.8040   4
   1  -1  22 7.35443 14.7936   1
  -1  -1  22 2.11857 14.9531   1
   1  -1 -22 3.46733 15.1803   1
  -1   1 -22 11.2205 19.6631   2
   0  -2   0 6.79959 1.20753   2
  -2   0   0 6.92974 1.48427   4
   2   0   0 11.1771 1.99963   1
   0  -2   0 7.69210 1.88557   3
   0  -2   0 2.75961 1.20154   4
  -2   0   0 10.8484 1.91675   2
   0  -2   0 5.60552 1.29008   1
   0  -2   1 4.71995 1.56425   3
   0  -2   1 6.18666 1.62661   2
   0  -2  -1 6.43842 1.65833   1
   2   0  -1 9.37443 2.17326   1
  -2   0  -1 5.76733 1.49274   4
  -2   0   1 5.91930 1.38933   4
   0  -2  -1 9.54317 2.38425   4
   0  -2  -1 6.80230 1.40731   2
   0  -2   1 9.76504 2.22123   1
   2   0   1 4.39193 1.40765   4
   0  -2   1 7.19895 1.73355   4
  -2   0   1 10.6069 2.00125   2
   2   0  -1 6.33432 1.74383   3
  -2   0  -1 7.06408 1.65874   2
   0  -2  -1 11.7470 2.52078   3
   2   0   2 794.385 19.9610   2
   2   0  -2 884.052 20.4028   3
   0  -2   2 774.338 18.2579   3
   0  -2   2 797.264 18.3226   4
   0  -2  -2 771.017 21.9728   1
   0   2  -2 849.628 18.9067   2
   0   2   2 796.088 21.6458   4
   2   0  -2 772.036 17.9030   4
  -2   0  -2 775.603 19.5126   4
   0   2   2 787.633 22.7744   1
   2   0   2 808.791 20.9898   4
   0   2   2 798.670 18.3798   2
  -2   0   2 874.584 19.4917   3
  -2   0  -2 754.913 19.1587   2
   0  -2  -2 880.057 24.4891   3
   0   2  -2 796.049 18.4401   3
  -2   0   2 826.161 21.1775   1
   0   2  -2 830.371 18.4120   1
   2   0  -2 797.213 19.7206   2
   2   0   2 667.163 15.7418   3
  -2   0   2 766.755 17.8728   4
   0   2  -2 779.567 18.2968   4
   2   0  -2 863.892 21.9097   1
  -2   0  -2 782.875 17.1630   3
   0  -2   2 748.082 18.2570   2
   0   2   2 810.463 23.5835   3
   0  -2  -2 792.475 18.6982   2
  -2   0   2 786.534 19.1469   2
   0  -2  -2 758.005 21.3799   4
   0  -2  -3 52.4497 5.87992   2
   0   2   3 57.7652 6.99514   1
   0  -2   3 58.0533 5.77616   4
   0   2   3 36.5409 5.16992   4
   2   0   3 42.7532 4.73617   3
   0  -2  -3 50.2703 6.51024   1
  -2   0  -3 44.2946 5.60803   2
   0   2  -3 56.9673 5.42006   1
   2   0  -3 42.5747 4.78968   4
   0   2  -3 34.1327 4.37159   4
  -2   0   3 50.4106 5.94612   2
  -2   0  -3 43.8079 3.52397   1
  -2   0   3 56.9842 6.09892   3
   0  -2   3 44.4451 4.97382   1
  -2   0   3 56.6152 6.79482   1
  -2   0  -3 36.7490 4.55217   3
   0   2  -3 55.4246 6.00527   3
   2   0  -3 40.4043 5.17684   4
   0   2   3 34.2849 5.50902   3
  -2   0  -3 35.7891 5.05653   4
   0   2  -3 44.2133 5.44563   2
   2   0  -3 45.3292 5.98732   1
   2   0   3 34.2378 4.93992   4
   0  -2  -3 50.0371 6.46033   3
   2   0   3 53.3206 6.22544   2
   0   2  -3 45.4126 4.80419   3
   0  -2   3 47.0424 5.94200   2
   2   0  -3 48.9382 5.63030   3
   0   2   3 41.5183 5.22519   2
   0  -2  -3 47.6670 6.17364   4
   2   0  -3 58.8005 5.93418   2
  -2   0  -4 2039.53 31.5790   1
   2   0   4 2122.03 43.9387   4
   2   0  -4 2167.20 42.6546   3
   0   2  -4 2093.08 39.8846   4
   2   0  -4 2182.51 43.0553   2
   0   2  -4 2113.33 42.2795   2
   0   2   4 2429.68 45.5223   2
   2   0  -4 1859.03 41.1491   1
   0   2  -4 2265.39 37.0543   1
   0  -2  -4 1905.13 39.6574   2
   0   2  -4 2260.59 39.6945   3
   0   2   4 1733.04 44.4679   3
  -2   0   4 2129.86 41.5006   3
  -2   0  -4 2257.14 40.4548   3
   2   0  -4 1971.03 40.0089   4
   0   2   4 2047.87 44.9482   4
   2   0  -4 2251.59 41.3784   4
   0   2  -4 2215.37 40.0706   4
  -2   0   4 2171.88 42.2730   2
   0   2   4 2190.07 47.9664   1
   0  -2  -4 2045.52 45.6123   1
   0  -2  -4 2295.42 47.5637   4
   2   0   4 2129.69 40.0181   3
   2   0   4 2052.27 43.0500   2
   2   0   4 2182.35 30.7532   1
   0  -2   4 2267.88 37.2001   1
  -2   0  -4 2321.33 44.9444   4
  -2   0   4 2176.90 44.2530   1
   0  -2  -4 1955.31 46.1151   3
   0  -2   4 2245.04 43.7069   2
   0  -2   4 2139.70 38.2607   3
   0  -2   5 94.8732 8.65895   1
  -2   0   5 107.959 10.8493   1
   0   2   5 75.7559 9.75592   4
   2   0   5 111.852 11.3850   2
  -2   0  -5 107.334 10.5861   2
   0   2   5 107.767 11.3904   1
   2   0   5 83.4454 9.42055   4
  -2   0  -5 103.968 9.71675   3
   0   2  -5 127.951 10.9277   4
  -2   0  -5 87.9664 7.44819   1
   0  -2   5 88.7891 8.83889   3
   0   2   5 86.9231 10.3721   3
   2   0   5 90.2984 7.49100   1
  -2   0  -5 123.474 11.3479   4
   0  -2   5 111.407 10.6221   2
   0   2  -5 110.917 9.13587   1
  -2   0   5 113.242 11.0214   2
   2   0  -5 106.340 9.91746   4
   2   0  -5 85.8796 9.86676   1
   0   2  -5 82.0208 9.41415   2
   0  -2  -5 93.4115 9.51645   2
   0   2  -5 88.3110 8.79463   3
   2   0   5 103.415 9.79904   3
   2   0  -5 99.7415 10.3526   3
   0  -2  -5 74.5377 9.98109   3
   0  -2  -5 111.894 11.1212   4
   0   2   5 114.387 11.1816   2
   0   2  -5 120.110 10.5721   4
  -2   0   5 89.9573 9.57824   3
   2   0  -5 87.8015 9.99678   2
   0  -2  -5 87.5882 10.3786   1
   2   0   6 678.824 28.9764   4
   0   2  -6 638.584 26.0203   3
   0  -2  -6 681.954 30.2880   4
  -2   0  -6 657.259 23.5623   1
  -2   0  -6 695.700 29.4570   2
   0   2  -6 633.651 23.6753   1
   0  -2  -6 703.533 29.3721   2
   2   0  -6 672.744 28.8087   3
   2   0  -6 704.251 29.8023   1
  -2   0   6 537.376 25.3463   3
   0  -2   6 657.314 28.9048   2
   0   2   6 606.580 27.8253   2
  -2   0  -6 712.492 28.1122   3
   2   0   6 661.185 27.3358   3
   0  -2   6 523.266 23.3140   3
   0   2  -6 627.235 28.3228   2
   2   0   6 605.551 28.3641   2
   0   2   6 634.457 29.7140   1
   0   2   6 710.964 32.2127   3
  -2   0   6 707.946 27.9181   4
   2   0   6 622.601 21.6684   1
   2   0  -6 646.873 26.8057   4
   2   0  -6 598.002 27.6556   2
   0   2  -6 702.987 28.3210   4
   0   2   6 706.148 30.6815   4
   0  -2  -6 636.947 30.0848   3
   0  -2  -6 699.674 30.0822   1
  -2   0  -6 610.245 27.7492   4
  -2   0   6 723.856 29.6929   1
   0  -2   6 651.997 24.1771   1
   0   2  -6 699.398 27.6715   4
  -2   0   6 712.882 29.2576   2
   2   0  -7 38.2758 7.72554   4
   2   0   7 17.8908 4.14716   1
   0   2  -7 16.6858 5.63209   3
  -2   0  -7 12.1157 3.97740   1
   0   2  -7 16.7311 5.92796   4
   2   0   7 21.3186 6.59954   2
   0  -2  -7 21.7854 7.63914   1
  -2   0   7 23.5146 6.69128   2
   0   2   7 13.9150 5.73308   1
   2   0  -7 20.1094 5.56717   3
   0  -2  -7 21.0441 6.11315   4
   2   0  -7 15.5080 5.79947   2
   0   2  -7 13.8471 4.68756   2
  -2   0   7 22.1817 6.07206   4
  -2   0   7 30.4056 6.69385   1
   0   2  -7 20.3956 7.31006   2
  -2   0  -7 28.9919 7.61916   2
   0   2   7 24.3248 7.06965   3
   0  -2  -7 23.7460 6.44764   3
   0   2   7 14.3672 5.49939   2
   0   2  -7 25.2228 6.25129   4
   2   0   7 18.0076 6.02390   3
  -2   0   7 22.4864 5.72329   3
   2   0   7 34.6841 7.66250   4
   0  -2   7 16.5844 4.84796   1
   0  -2   7 9.35985 3.24716   3
   0   2   7 28.0495 7.58571   4
   0   2  -7 19.7923 5.78111   1
  -2   0  -7 23.4751 6.01045   3
  -2   0  -7 24.5832 6.10147   4
   2   0  -7 10.5423 4.79325   1
   0  -2  -7 28.5926 7.23681   2
  -2   0   8 174.946 16.6941   4
   0   2   8 165.687 17.8297   3
  -2   0   8 154.272 15.5728   1
   0   2  -8 177.604 14.6950   1
   0   2  -8 157.970 17.0658   2
   0  -2  -8 116.682 14.0022   1
   2   0   8 167.206 17.2438   2
   2   0   8 159.226 13.4881   1
   2   0  -8 169.237 16.7160   3
  -2   0  -8 139.119 14.7376   3
   0   2  -8 146.172 14.7942   3
   2   0  -8 179.241 17.6835   2
  -2   0  -8 183.662 17.8523   4
   2   0   8 174.990 16.7767   3
   0   2  -8 181.839 16.9093   4
   0  -2   8 148.373 13.4613   1
   0   2   8 191.736 18.3591   4
   0  -2   8 188.337 16.5613   3
   0  -2  -8 168.742 16.9287   4
   2   0   8 174.856 17.2220   4
   0   2  -8 135.352 14.6048   4
  -2   0  -8 168.650 14.2205   1
   2   0  -8 151.903 15.4105   4
  -2   0  -8 174.219 17.2763   2
   0   2  -8 186.232 17.7308   2
  -2   0   8 156.420 15.9028   3
   0  -2  -8 159.193 16.5003   2
   2   0  -8 171.691 16.7663   1
   0  -2  -8 157.101 16.5660   2
   0  -2  -8 179.962 17.4882   3
   0   2   8 163.178 17.2039   1
   2   0  -9 16.0859 6.22758   2
   0   2   9 25.9346 7.76830   3
   0   2  -9 16.1673 4.86715   4
   0   2  -9 18.9159 6.63707   2
   0  -2  -9 9.48898 4.50452   2
   0   2   9 11.9787 6.08028   1
  -2   0  -9 10.9371 5.17001   2
   0  -2  -9 17.0923 6.98004   4
   2   0   9 11.9744 4.69546   1
  -2   0  -9 14.6914 5.36024   3
  -2   0   9 18.9610 7.08788   4
   2   0  -9 9.85700 4.83081   3
  -2   0  -9 20.1191 5.84829   1
   0   2  -9 8.92671 4.03826   1
  -2   0  -9 18.4914 5.66133   4
   0   2  -9 16.5147 5.87271   4
   0  -2  -9 20.8073 8.23585   3
   2   0  -9 19.3690 7.42439   1
   0   2  -9 2.50832 4.15550   2
   0   2  -9 13.0362 4.47926   3
   0  -2  -9 16.7999 6.06347   1
   2   0   9 27.2876 7.46398   4
   2   0  -9 21.9625 6.86316   4
  -2   0   9 17.5443 6.69493   3
   0  -2  -9 6.11327 4.90870   2
  -2   0   9 23.4119 7.15517   1
   0  -2   9 23.5233 6.48316   1
   0  -2   9 6.22246 3.38847   3
   2   0  -9 23.5300 6.76431   2
   0   2   9 15.0902 5.45508   4
   2   0   9 7.30035 5.59321   3
   0   2 -10 1108.16 49.3271   2
   0   2 -10 958.319 39.8980   1
   2   0  10 1014.84 38.0945   1
   2   0  10 1007.40 44.0125   3
   2   0 -10 728.751 37.6790   4
  -2   0 -10 1010.03 47.5576   2
   0  -2 -10 1036.06 47.5148   4
  -2   0 -10 903.065 44.2291   2
   0  -2  10 891.728 40.8831   3
   0  -2 -10 1056.57 47.1781   2
   0   2 -10 909.126 41.0561   3
  -2   0 -10 934.422 38.6625   1
   0   2 -10 945.771 42.2626   4
  -2   0  10 892.632 42.4784   4
   0  -2 -10 992.579 44.8489   1
  -2   0 -10 790.037 41.0104   4
   2   0 -10 968.205 43.9057   3
   0   2  10 1088.29 50.8468   3
   0   2  10 877.887 43.4454   4
   0  -2  10 1012.56 40.0169   1
   0  -2 -10 1012.81 46.9751   2
  -2   0  10 875.063 41.3091   3
   2   0  10 788.208 41.0559   4
  -2   0 -10 1013.05 44.3491   3
   2   0 -10 967.847 43.7234   1
   0   2 -10 977.299 45.9776   2
   0  -2 -10 921.414 45.2129   3
   0   2  10 818.796 41.9129   1
   2   0 -10 1020.77 45.9213   2
   2   0 -10 969.213 46.0609   2
   0   2 -10 962.190 44.3001   4
  -2   0  10 937.541 43.0160   1
   2   0 -11 78.4267 14.1917   4
   2   0  11 98.5003 15.8350   3
   0   2  11 93.2474 15.9070   1
   0   2 -11 116.587 17.9519   2
   0  -2 -11 101.774 16.7894   1
   2   0 -11 111.759 16.4561   2
   0   2 -11 100.360 16.6460   2
   0   2 -11 82.9619 14.5018   4
   0   2  11 157.206 20.1590   4
  -2   0 -11 123.477 18.4014   4
  -2   0 -11 108.509 17.7794   2
   2   0  11 113.413 13.7846   1
   0  -2 -11 118.714 18.1870   4
  -2   0  11 88.3296 14.6426   1
   0   2  11 73.8794 14.4179   3
   0  -2 -11 109.180 17.3937   3
  -2   0  11 108.087 15.6501   3
  -2   0 -11 105.402 14.5221   1
  -2   0 -11 112.744 17.4327   3
   2   0 -11 136.206 18.8439   3
   0  -2  11 99.2543 13.6998   1
   0   2 -11 93.3407 15.5298   3
   0   2 -11 130.161 17.0192   4
   0   2 -11 82.4876 13.2653   1
   2   0  11 88.1147 15.1979   4
   2   0 -11 101.674 16.0415   2
   2   0 -11 104.640 15.9081   1
  -2   0 -11 112.346 17.4226   2
   0  -2 -11 116.447 16.8996   2
   0  -2 -11 140.956 19.5249   2
   0  -2  11 123.643 16.5313   3
  -2   0 -12 1435.15 62.1411   2
   0  -2 -12 1323.54 59.4730   4
   2   0 -12 1350.89 59.9822   2
   2   0  12 1209.81 46.6404   1
   2   0 -12 1282.04 55.7187   4
   2   0 -12 1310.24 55.8730   1
   0  -2 -12 1301.46 56.2877   1
   0  -2  12 1209.64 48.8397   1
   0  -2 -12 1113.21 53.0166   2
   0   2  12 1382.59 62.5854   3
   2   0 -12 1393.79 60.0222   2
   0   2  12 1293.90 57.3311   1
   2   0  12 1112.18 54.0772   4
  -2   0 -12 1366.27 57.2728   3
   0   2 -12 1349.17 59.8098   2
   2   0 -12 1243.22 56.1957   3
  -2   0  12 1327.43 57.2663   3
   2   0 -12 1253.96 57.6786   4
   0   2 -12 1291.26 55.4810   4
   0   2 -12 1386.89 60.5751   2
   0  -2  12 1264.83 54.1748   3
   0   2 -12 1063.84 49.9584   3
   0   2  12 1200.86 56.5855   4
   0  -2 -12 1317.83 58.5383   2
  -2   0 -12 1236.12 50.3841   1
   2   0  12 1290.62 55.6137   3
  -2   0 -12 1255.88 57.0515   2
   0  -2 -12 1110.65 55.6983   3
  -2   0 -12 1195.07 55.7245   4
   0   2 -12 1355.38 58.4253   4
  -2   0  12 1313.15 56.0281   1
   2   0  13 13.0031 6.25320   1
  -2   0  13 24.1360 9.88396   3
   2   0 -13 17.8531 9.25290   4
   0   2 -13 18.3024 10.2098   1
   0  -2 -13 22.9399 9.34208   2
  -2   0  13 5.38690 5.07773   1
   0   2 -13 42.2655 12.6488   4
   2   0  13 33.9307 10.5879   3
   2   0 -13 19.2398 7.97253   1
   0  -2  13 30.3636 10.7259   3
   0  -2 -13 7.78783 7.19199   4
   2   0 -13 37.3466 12.5003   2
   0  -2 -13 48.2095 12.0481   1
  -2   0 -13 28.7746 10.6072   4
   0   2 -13 27.5955 9.97077   3
   2   0 -13 20.2484 9.27416   3
  -2   0 -13 18.0932 7.73893   1
   0   2 -13 22.1739 9.40241   4
  -2   0 -13 8.55576 5.48650   2
   0   2  13 31.9130 10.5273   3
   0   2 -13 3.07050 7.03634   2
   0  -2 -13 29.8970 11.1862   2
   0   2 -13 21.3610 9.90484   2
   2   0 -13 24.0429 10.0582   4
  -2   0 -13 27.2987 10.3589   2
   0  -2 -13 20.1275 11.8158   3
   0  -2  13 8.85078 5.36312   1
  -2   0 -13 17.4093 9.27653   3
   2   0 -13 6.30726 5.35749   2
   2   0  13 17.6755 8.00279   4
   0   2  13 9.17666 6.84835   1
   0   2  13 23.6093 9.57610   4
   2   0  14 4.32214 7.98945   4
   2   0 -14 11.4464 7.31632   4
   2   0  14 8.74490 6.16234   1
  -2   0 -14 37.8435 12.6503   3
  -2   0  14 4.67166 5.77506   1
   2   0  14 4.04747 8.08410   3
   0  -2 -14 10.8029 8.72031   2
  -2   0 -14 0.56097 6.35641   2
  -2   0 -14 21.3082 11.7302   4
   2   0 -14 11.1341 8.93635   1
   0   2 -14 26.3588 10.0847   2
   0   2 -14 27.3009 10.5248   3
   2   0 -14-3.85387 5.75618   2
   0   2  14 4.29132 4.82038   1
   0   2 -14 3.86897 6.91636   2
   0  -2  14 9.40816 6.92534   1
   0  -2 -14 2.52890 9.22477   3
   0   2 -14 5.24766 8.26101   4
   0  -2 -14 3.29188 5.67489   4
  -2   0  14 2.08199 7.11476   3
   0   2 -14 3.55998 7.07428   4
   0   2 -14 19.9330 10.9420   1
   2   0 -14 67.0139 15.0713   3
  -2   0 -14-0.41814 3.91261   1
   0  -2  14 5.81465 5.42845   3
   0   2  14 0.86868 5.73071   3
   0  -2 -14-1.00227 4.66731   1
  -2   0 -14 10.8761 8.49245   2
   2   0 -14 11.6799 7.75914   2
   0   2  14 11.1177 8.42442   4
   2   0 -14-0.54123 5.74741   4
   0  -2 -14-2.42072 6.05873   2
   0  -2 -15 39.3739 12.8282   2
   2   0 -15 31.7651 11.9187   3
   0   2 -15 36.4911 12.1089   4
   0   2  15 72.1242 17.5199   3
   0   2 -15 55.6740 15.3847   2
   0  -2  15 56.4038 14.0307   1
   2   0 -15 51.5378 15.0006   4
  -2   0 -15 39.3097 11.3682   1
   0   2 -15 35.1976 11.4370   1
   0   2 -15 43.4574 13.5788   3
   2   0  15 44.5593 13.6326   3
   0   2 -15 37.6293 13.4091   4
   2   0 -15 28.2257 12.1075   2
   0   2  15 29.5574 12.2431   4
   0   2  15 79.7080 18.2914   1
   2   0 -15 61.4862 16.4245   2
  -2   0  15 59.1027 15.5715   3
   0  -2  15 35.2666 12.8779   3
   0  -2 -15 31.9131 14.1038   4
  -2   0 -15 49.6564 14.8426   3
   2   0 -15 55.8893 16.1367   4
   0   2 -15 57.8195 17.5512   2
   0  -2 -15 64.5206 18.0598   3
  -2   0 -15 29.4762 11.3171   4
   2   0 -15 43.4974 13.7068   1
  -2   0 -15 83.6312 22.5978   2
   2   0  15 57.5256 12.9283   1
  -2   0 -15 39.9388 14.4919   2
   0  -2 -15 41.6220 13.4321   2
   2   0  15 49.6764 14.7731   4
   0  -2 -15 30.2571 11.4932   1
  -2   0  15 41.4680 13.4318   1
   0   2  16 12.9629 9.93948   1
  -2   0 -16 3.83695 8.15497   4
   0   2  16 11.8003 11.4087   3
   0   2 -16 21.9540 10.4325   1
  -2   0 -16 15.9490 10.0542   2
   0   2  16 13.4020 10.0263   4
   0  -2 -16 17.3172 10.1085   2
   2   0  16 5.36227 7.88532   1
  -2   0  16 3.77238 7.88714   1
   0  -2  16 24.3804 10.7601   1
   2   0  16 22.9000 11.5922   3
   2   0 -16 32.8883 14.0281   2
   0  -2 -16 10.6359 10.3915   4
  -2   0 -16 25.2054 13.4084   2
   0   2 -16 22.5546 11.7909   3
   2   0 -16 25.4820 10.8487   4
   2   0 -16 23.6161 12.5863   4
   0  -2  16 19.9289 10.1255   3
   0   2 -16 23.9046 14.1637   4
   0  -2 -16 7.90593 9.91103   3
   0  -2 -16 10.4859 8.21968   1
  -2   0 -16 17.8586 11.4181   3
   2   0 -16 5.75520 7.39540   2
   0   2 -16 21.2007 10.7592   2
   2   0 -16 36.1709 13.2203   3
   0   2 -16 16.0034 9.02034   4
   2   0  16 51.2183 15.8348   4
   2   0 -16 27.2844 14.2987   1
  -2   0 -16 33.3540 12.3832   1
   0   2 -16 6.61293 7.94554   2
   0  -2 -16 16.8926 12.2107   2
  -2   0  16 8.73837 9.00210   3
   2   0 -17 27.5813 13.4928   2
   0   2 -17 9.89522 10.0038   3
  -2   0  17 13.8213 11.2836   1
   0   2 -17 24.6278 13.9916   4
   2   0 -17 9.68870 9.69313   4
   0   2 -17 3.76823 9.40398   4
   2   0 -17 18.8113 14.6990   4
  -2   0 -17 13.4250 10.5432   3
   0  -2  17 5.96853 7.34622   3
   0  -2 -17 15.0235 11.5005   1
  -2   0 -17 19.7194 11.6443   4
  -2   0 -17 7.86590 10.5208   2
   0   2 -17 5.68177 8.76954   2
  -2   0  17 11.4769 11.1634   3
   2   0  17 17.8978 12.3611   4
   0   2  17 4.11147 10.8828   4
   0  -2 -17 29.1197 13.8363   4
   2   0  17-1.99301 7.59966   3
   0   2  17 24.8395 12.4640   1
  -2   0 -17 29.7886 14.1055   2
   0  -2  17 26.8222 11.9208   1
   0  -2 -17 20.4082 11.9010   2
   0  -2 -17 12.4310 11.2093   2
   2   0 -17 1.02882 7.58659   2
   2   0 -17 11.5541 9.07169   1
   0  -2 -17 11.7015 13.1511   3
   2   0 -17 13.8723 12.0274   3
  -2   0 -17 10.5502 8.65670   1
   0   2  17 7.94427 10.3288   3
   2   0  17 5.33385 7.92240   1
   0   2 -17 15.5998 11.4594   1
   0   2 -17 14.7973 12.1735   2
   0  -2 -18 607.472 52.3890   3
  -2   0 -18 492.803 47.3078   4
   0  -2  18 499.713 41.5387   1
   0   2  18 582.041 49.9727   4
  -2   0 -18 567.171 48.9531   2
   0   2 -18 628.480 46.6675   1
  -2   0 -18 567.514 44.6648   1
   0   2  18 674.675 56.1317   3
   0  -2  18 545.460 46.3763   3
   0   2 -18 598.218 51.6255   2
   2   0  18 647.397 45.1959   1
   2   0 -18 525.813 45.6699   2
   0  -2 -18 648.000 51.0661   1
   0   2 -18 595.715 50.4822   4
   2   0 -18 535.070 47.5133   4
   2   0 -18 532.247 48.4812   4
   2   0 -18 565.123 47.9397   1
   0  -2 -18 586.811 49.9620   2
   2   0  18 554.828 48.1539   3
   0   2 -18 549.804 49.2792   4
   0   2 -18 601.770 50.8151   3
   0   2 -18 624.526 51.0447   2
   0  -2 -18 626.174 52.8418   4
   0  -2 -18 652.004 50.9208   2
  -2   0  18 600.519 49.6817   3
  -2   0 -18 548.395 47.9031   3
   0   2  18 636.690 50.0942   1
   2   0 -18 547.956 49.5691   3
  -2   0 -18 685.263 55.4827   2
  -2   0  18 576.337 47.6608   1
   2   0 -18 498.651 46.7800   2
   0   2  19 70.0387 19.7354   1
   2   0 -19 106.716 26.3346   2
   0   2 -19 34.1927 16.9580   2
   0   2 -19 54.8886 19.4883   1
   0  -2  19 53.7020 18.2581   3
   2   0  19 34.1975 16.5069   3
  -2   0 -19 45.6938 17.5442   2
  -2   0 -19 65.3043 21.3444   2
   0  -2 -19 28.6080 13.9836   2
   0  -2 -19 80.4543 21.5088   4
   2   0 -19 50.3272 20.2154   4
   2   0 -19 23.0887 14.1616   1
  -2   0  19 42.4153 18.1014   3
  -2   0  19 63.5542 20.0685   1
   2   0  19 41.7380 17.3109   1
   0   2 -19 155.497 30.7336   4
   0   2 -19 80.9518 21.4767   3
   2   0 -19 16.6968 15.0451   3
  -2   0 -19 59.7394 20.6059   3
   0  -2  19 55.2050 15.8192   1
   0  -2 -19 63.3778 18.8010   1
   0   2  19 59.5781 19.7952   3
  -2   0 -19 54.6171 18.4789   4
  -2   0 -19 49.1570 16.7319   1
   0   2 -19 61.2879 19.9230   4
   0   2 -19 73.0017 20.9109   2
   0  -2 -19 58.7494 21.6369   3
   2   0 -19 98.2037 24.7351   2
  -2   0 -19 40.4838 16.7911   4
   0  -2 -19 84.1977 22.3350   2
   2   0 -19 50.0758 17.0941   4
   0  -2 -20 238.785 35.5186   4
   0   2  20 209.446 34.4792   3
  -2   0 -20 295.668 38.7084   3
   0  -2  20 214.855 30.3039   1
  -2   0 -20 242.007 35.9091   2
   0  -2 -20 238.758 33.0690   1
   2   0 -20 287.353 37.1963   1
   0   2 -20 315.154 40.3235   2
   0  -2 -20 282.561 37.9235   2
   2   0 -20 281.972 39.3349   4
  -2   0 -20 303.484 40.2659   4
   2   0  20 163.253 30.7640   3
  -2   0 -20 177.161 31.1877   4
   0  -2 -20 294.793 39.4515   3
  -2   0  20 254.048 38.0540   3
   0  -2  20 264.992 35.9051   3
  -2   0  20 217.986 33.2451   1
   0   2 -20 269.221 37.8822   2
   0   2 -20 268.780 37.9794   3
  -2   0 -20 302.703 34.6708   1
   0  -2 -20 299.413 37.0333   2
  -2   0 -20 307.551 38.4145   2
   0   2 -20 294.201 39.0828   4
   0  -2 -20 258.857 37.1512   4
   2   0 -20 282.615 38.8770   3
   2   0 -20 302.590 41.1292   4
   0   2 -20 238.574 31.7948   1
   0   2 -20 239.782 36.4794   4
   2   0  20 202.454 30.2786   1
   2   0 -20 260.334 36.0825   2
   2   0 -20 295.531 39.8370   2
   0   2  20 159.782 29.7648   1
   2   0 -21 7.24379 16.4152   4
   2   0 -21 4.95889 12.9279   1
   2   0 -21 41.3192 19.6104   2
  -2   0 -21 29.4907 19.4407   4
   2   0 -21-0.92404 11.6339   4
   2   0 -21 41.1814 19.6825   3
   0  -2 -21 3.61008 14.8921   4
   0   2  21 4.34045 14.7229   3
   0   2 -21 65.8809 25.9154   2
  -2   0 -21 11.6521 15.1973   2
   2   0  21 7.18793 14.1953   3
  -2   0 -21 54.2312 21.2983   3
   0  -2 -21 5.62103 14.9824   4
   0  -2  21 17.7423 16.5567   3
   0  -2 -21 9.67628 15.3118   2
   2   0 -21 14.9490 15.4203   2
  -2   0 -21 11.1202 15.4356   2
  -2   0  21 10.6270 13.6591   1
   0   2 -21 15.5703 14.8472   1
   0   2 -21 19.9106 15.3789   4
  -2   0 -21 17.9416 18.6893   4
   0  -2 -21 31.9536 19.0650   3
   0  -2 -21 27.9721 18.2764   2
   0   2  21 2.06428 13.4425   1
   0   2 -21 42.3570 19.4174   2
   0   2 -21 38.8890 18.7043   3
   2   0  21 8.92173 13.2489   1
   0  -2 -21 23.6281 15.8348   1
  -2   0 -21 8.95137 14.1741   1
   0  -2  21 9.66199 12.3131   1
  -2   0  21 17.3559 16.0769   3
   0   2 -21 18.9026 17.7798   4
   2   0 -22 7.50050 16.5654   1
   2   0  22 26.8554 16.5162   1
   0  -2  22 17.1983 19.2553   3
   0   2 -22-0.48728 13.6820   4
   2   0 -22 5.83253 16.0377   4
  -2   0 -22 16.1499 17.2345   2
  -2   0 -22-0.50265 15.0488   4
   0  -2 -22 1.75853 15.0320   2
  -2   0  22 1.38348 15.2776   1
  -2   0  22 22.5378 21.1647   3
   0  -2 -22 46.5366 22.5963   2
   2   0 -22 5.41478 17.3226   2
   0  -2 -22 18.1469 17.2515   4
  -2   0 -22 29.8719 22.0875   2
   0   2 -22 3.78268 17.9493   3
  -2   0 -22 13.4816 18.0962   4
   0  -2  22 3.60315 14.9056   1
   0   2  22 16.8416 22.2408   3
   0  -2 -22 4.96623 19.0505   4
   0   2 -22-0.49071 13.9555   4
   0   2 -22 8.83033 15.9904   2
   2   0  22 5.74948 15.6737   3
   2   0 -22 15.2242 18.8534   3
   2   0 -22 21.6911 22.3494   4
  -2   0 -22 13.1354 15.9091   3
   0   2 -22 9.42788 20.3058   2
   2   0 -22 4.27821 15.7904   2
   0   2  22 1.75058 14.3482   1
   0  -2 -22 50.9530 24.1651   3
   1  -2   0 45.1773 4.45290   1
  -2  -1   0 38.1637 3.44836   3
  -1  -2   0 48.2221 4.22722   1
   1  -2   0 44.1613 3.03195   4
  -2   1   0 52.9109 4.62395   1
  -1  -2   0 53.2796 4.84024   3
  -1  -2   0 33.9186 3.93776   4
  -2  -1   0 36.7884 3.13550   1
   1  -2   0 36.6755 3.69090   3
  -2   1   0 42.0502 3.11729   2
  -2  -1   0 49.4895 5.02903   2
  -2  -1   0 45.2236 4.33106   4
  -1   2   0 37.7389 2.99341   4
   2  -1   0 36.5349 3.75237   1
  -1  -2   0 45.6236 4.51620   2
   2   1   0 41.2491 3.25940   1
  -2   1   1 2.88959 1.34096   3
  -2  -1  -1 3.44606 1.50858   2
  -1   2  -1 8.30982 1.78210   3
   2  -1  -1 5.07748 1.19842   2
   1  -2  -1 14.6455 2.24544   3
  -2  -1  -1 1.76025 0.68114   3
  -2  -1   1 1.91960 1.27089   4
  -2  -1   1 10.3211 2.24845   3
  -1  -2   1 4.55740 1.77850   2
   2  -1  -1-3.15583 1.43779   1
  -2  -1  -1 2.96314 1.48203   4
  -1  -2  -1 30.1983 3.79954   2
  -1   2  -1 3.82232 1.06103   2
  -1  -2  -1 5.75595 2.50757   4
   2   1   1 6.73998 1.83387   3
   1  -2   1 7.40471 1.43758   3
   1  -2   1 1.77010 0.74228   2
   2  -1  -1 6.22263 1.86726   3
  -1  -2  -1 11.2717 2.64657   3
   1  -2  -1 2.73588 1.35828   1
  -1   2  -1 16.0710 1.93626   4
  -1  -2   1 4.03079 1.03589   4
  -1  -2  -1-0.71128 0.89451   1
  -1   2   1 5.70808 1.50815   4
   2  -1  -1 9.02102 1.60900   4
   1   2  -1 6.10692 1.88141   1
  -2   1   1 3.29896 1.13811   2
   2  -1   1 3.92258 1.44979   2
   2   1  -1 5.91738 1.81630   1
   1  -2   1 11.9745 2.40606   1
  -2  -1  -1 2.77765 0.80564   1
  -1  -2   1 1.74036 1.04461   3
   1  -2   1 5.40780 1.52130   4
  -2   1  -1 0.32768 1.17896   2
  -2  -1   1 7.11937 2.16651   2
   1  -2  -1 5.14097 1.69328   4
  -2  -1  -2 22.8663 3.69988   2
   2   1  -2 29.7605 4.36312   2
   2  -1  -2 23.1429 3.13862   4
   2  -1   2 26.7462 4.05965   2
  -1  -2   2 19.7992 3.75927   2
   2   1  -2 28.4150 4.01403   4
   1  -2   2 37.1066 4.08613   2
  -2  -1  -2 30.8258 4.01744   3
   1   2   2 23.8909 3.89088   2
  -2  -1   2 26.2974 3.89224   1
  -1  -2  -2 36.4830 5.20927   4
  -1   2  -2 36.3988 3.85208   2
  -1   2  -2 24.1052 3.09747   4
   1   2  -2 24.8827 3.48756   3
  -2   1   2 33.5055 3.89596   4
   2   1   2 26.8703 4.32335   4
   1   2   2 26.4331 3.72228   1
   1  -2   2 26.0226 3.05997   3
  -2  -1  -2 32.2720 2.89324   1
  -2   1  -2 35.6042 3.94892   4
   1   2  -2 20.2504 3.65210   4
   1  -2  -2 30.0487 3.85752   2
   1  -2  -2 38.8947 4.67700   4
   1   2   2 17.5388 3.83172   4
   1  -2  -2 30.2368 5.07940   3
  -2  -1   2 30.7333 4.37400   2
  -1  -2   2 26.1613 3.80307   4
   1  -2   2 24.1003 3.45482   4
   1   2  -2 29.8916 4.18260   2
  -2   1   2 34.4415 4.75734   3
  -2   1  -2 23.4123 2.11179   1
  -2  -1  -2 38.6479 4.87736   4
   2  -1  -2 20.3159 3.19781   2
   2   1  -2 24.7646 3.70253   1
  -2   1   2 25.5048 3.53820   2
  -1   2  -2 19.0309 2.88105   1
   1  -2  -2 30.1661 5.22310   1
  -2  -1   2 13.1580 2.68927   4
   2  -1  -2 36.1842 4.71628   3
   2   1   2 28.5316 4.25712   2
  -1  -2  -2 33.1426 3.92773   1
   1   2  -2 36.6894 4.35656   1
  -1  -2  -2 32.8415 4.86416   3
  -1  -2  -2 25.1761 3.69455   2
  -1  -2   2 33.4439 4.12560   1
   2   1  -2 23.6967 3.52619   3
   2   1   2 26.2557 3.94894   3
  -1   2  -2 30.8646 3.43998   3
   2  -1   2 29.7492 3.50681   4
   2  -1  -2 20.9743 4.44379   1
  -1   2   2 33.6446 4.33643   4
  -2   1  -2 27.1085 2.14171   1
   1   2   2 33.5451 5.09004   3
  -1  -2   2 23.3507 3.56175   3
  -2   1   2 26.4264 4.76908   1
  -2   1  -2 25.6574 2.63752   3
  -1   2   2 26.4993 3.54393   2
  -1   2   2 16.9694 4.16998   3
  -1   2   2 33.1150 5.56313   1
  -2   1  -2 23.1695 3.33298   2
  -1   2  -3 3020.31 37.8869   3
   1  -2  -3 3119.97 54.9550   1
   2  -1   3 2678.78 26.0417   1
  -1   2  -3 2921.85 39.8708   4
   1   2  -3 2942.69 42.5348   3
  -2  -1  -3 3047.42 46.3184   3
   1  -2  -3 2776.90 45.0910   4
   2  -1  -3 2542.54 39.9334   2
  -2   1   3 3150.27 42.6353   4
  -1  -2   3 3155.86 44.2554   4
  -2  -1  -3 2804.15 34.5210   1
   1   2  -3 2675.75 43.9071   2
   2   1  -3 3151.78 44.3439   1
  -1   2   3 3062.19 52.9352   3
  -2   1   3 3214.94 52.4437   1
   1   2  -3 2937.36 43.6663   4
  -2  -1   3 2762.28 42.6073   1
  -1  -2   3 2960.52 41.1482   1
   1   2   3 2727.36 50.0529   3
   2   1   3 2787.44 46.4578   3
  -1  -2  -3 2852.19 49.4506   3
  -1   2  -3 3006.56 35.7861   1
  -1   2  -3 2555.85 35.4056   3
  -1  -2  -3 2787.70 43.3867   1
   2   1   3 3192.35 46.8815   2
  -1   2  -3 3026.89 43.3293   2
   1   2  -3 2903.49 40.7787   1
   2  -1   3 2886.98 44.3964   2
   1   2   3 2942.69 50.4689   4
   2   1   3 2744.43 36.9212   1
  -2   1  -3 2787.19 27.5988   1
   2   1  -3 2911.26 45.0536   2
  -1  -2  -3 3031.17 50.2095   4
  -1   2   3 2918.89 45.0193   4
   2  -1  -3 2983.79 46.7862   3
   1  -2  -3 3072.66 53.3401   3
  -2   1   3 2558.18 39.5131   2
   2  -1  -3 2764.05 39.8287   4
   1  -2  -3 2948.63 42.7268   2
  -1   2   3 3026.12 54.0457   1
   2   1  -3 2506.63 39.6054   4
   1   2   3 2511.58 44.5230   1
   1  -2   3 2920.85 35.9861   1
  -1  -2  -3 3017.56 45.4234   2
   2  -1   3 2948.65 34.8497   3
   1   2   3 2868.25 43.7094   2
  -2  -1  -3 3018.17 48.4807   4
   2  -1   3 2837.02 39.7824   4
   2   1   3 2997.67 50.3279   4
  -2   1  -3 2951.59 42.8714   2
  -1  -2   3 3018.68 45.1456   2
  -2   1   3 2896.89 45.5169   3
  -2  -1  -3 2780.93 44.2995   2
  -1   2   4 108.418 10.9295   1
  -1   2  -4 81.8201 6.83055   1
  -2  -1  -4 119.269 11.5581   4
   2  -1   4 77.4252 8.47190   2
  -2   1  -4 87.2864 8.46130   4
  -1  -2   4 98.7176 9.37947   2
   1   2   4 86.2892 9.61951   1
  -2  -1   4 84.6684 8.25394   2
   2  -1  -4 98.6305 10.0673   1
  -1   2  -4 78.1528 7.74695   4
   1   2  -4 86.6947 8.71852   2
   1   2  -4 91.8213 8.52900   4
   1   2  -4 47.5985 5.90309   1
   1  -2   4 107.626 8.14742   3
  -1   2   4 97.9006 10.7540   3
  -1  -2  -4 110.525 11.0010   4
   2  -1   4 97.6057 8.64193   4
   1  -2   4 93.9284 7.14045   1
   1   2   4 86.3671 9.86038   4
  -1  -2   4 98.8271 8.29402   1
  -2   1   4 95.6937 10.0919   1
  -1  -2  -4 74.2238 8.99897   2
  -2   1   4 98.3628 8.89232   4
  -2   1   4 95.6272 8.71963   2
   1  -2  -4 86.6514 10.1213   1
  -1   2   4 93.2606 9.19364   4
   2  -1  -4 101.656 9.31101   2
  -1  -2  -4 87.7864 8.96262   1
   1  -2  -4 95.0404 10.4609   3
  -1  -2   4 95.3379 8.43303   3
   2  -1   4 93.1371 7.40523   3
   1  -2  -4 103.564 9.33885   2
  -1   2  -4 126.117 10.1634   2
   1   2  -4 79.9025 7.84809   3
   1  -2  -4 94.4886 9.01164   4
   2   1  -4 65.6852 7.86361   2
  -1  -2   4 87.1458 8.30923   4
   2   1  -4 87.9375 8.57674   3
   2  -1  -4 97.1155 9.55564   3
  -2  -1   4 89.8324 8.91663   3
   1   2   4 94.8133 9.58199   2
  -1   2  -4 99.9549 9.38918   2
  -2  -1  -4 70.2250 8.31408   3
  -1   2  -4 96.4777 7.99576   3
  -2   1  -4 93.5121 6.23416   1
   2   1   4 97.0903 10.4997   4
  -2  -1  -4 87.6580 7.43943   1
   2   1   4 76.8157 8.73695   2
   2   1   4 92.2890 7.67472   1
   2  -1   4 101.752 6.26270   1
   2   1  -4 92.9521 8.41898   4
   1   2   4 112.804 11.1012   3
  -2  -1  -4 89.2311 9.02083   2
  -2   1  -4 113.936 8.31988   3
   2  -1  -4 73.0967 7.56642   4
  -2   1  -4 61.9609 7.38174   2
  -2  -1   4 86.5698 8.40214   1
  -1   2  -4 117.078 9.35684   4
   2   1   4 111.981 10.3340   3
  -2   1   4 75.6335 8.50373   3
  -1  -2  -4 92.4637 10.4240   3
   1  -2  -4 81.2170 8.53902   2
   2   1  -4 85.0087 8.57182   1
  -1  -2  -5 2653.01 57.5994   3
   2   1  -5 2587.84 49.5403   1
  -1   2  -5 2850.98 54.6106   2
  -2  -1  -5 2391.22 43.1582   1
   1   2   5 2832.28 59.1486   4
  -2   1  -5 2682.99 53.3281   2
   1  -2  -5 2141.45 47.5542   2
  -2  -1   5 2120.66 46.3831   3
  -1  -2  -5 2496.18 55.5253   4
  -1   2  -5 2634.95 48.7760   4
  -1  -2   5 2525.53 51.9696   2
   2   1   5 2131.17 48.9471   3
  -2  -1   5 2590.87 52.3146   2
  -1  -2  -5 2457.74 50.7273   1
  -1  -2   5 2600.03 48.3288   3
   1   2  -5 2588.65 51.8358   2
   1   2  -5 2627.79 49.5384   4
   2   1   5 2578.37 53.6343   2
  -2  -1  -5 2428.01 51.0307   2
  -2   1  -5 2839.20 40.7321   1
  -2  -1  -5 2818.15 57.4549   4
  -2   1   5 2623.94 56.1433   1
  -1   2   5 2771.73 59.7452   1
  -2   1   5 2632.16 50.3629   4
   2  -1   5 2197.37 46.0217   4
  -1   2  -5 2510.65 51.6695   2
   1  -2  -5 2248.00 53.1891   1
   1   2  -5 2330.22 44.1644   1
  -2  -1   5 2843.84 52.7748   1
  -1   2   5 2565.69 56.4461   3
   2  -1  -5 2503.40 53.4844   3
   2  -1  -5 2470.57 54.4772   1
   2  -1   5 2597.46 53.6433   2
   2   1   5 2854.00 47.2638   1
   2  -1   5 2553.45 45.2835   3
   1  -2  -5 2663.56 53.3973   4
  -2   1   5 2585.15 51.0974   2
   2   1  -5 2708.15 50.6541   4
   2   1   5 2376.82 53.5120   4
   1   2  -5 2570.68 47.9499   3
  -2   1   5 2085.46 48.1703   3
   1  -2   5 2533.84 41.0487   1
  -1   2  -5 2736.54 42.3732   1
   1   2   5 2443.34 56.8544   3
  -1   2  -5 2786.94 47.5719   3
   2  -1  -5 2642.56 52.2158   2
   2  -1   5 2580.06 36.7535   1
   1  -2  -5 2445.89 50.9757   2
  -2   1  -5 2682.33 51.0895   4
  -2   1  -5 2638.67 46.2225   3
   2   1  -5 2787.94 52.1830   3
   1   2   5 2651.17 54.9683   1
  -1  -2  -5 2522.22 51.3217   2
  -1  -2   5 2554.61 46.5962   1
   2   1  -5 2121.40 45.9332   4
   1   2   5 2699.29 54.1030   2
   1   2  -5 2713.82 51.2762   4
  -1   2   5 2515.19 51.7150   4
   2   1  -5 2715.16 53.8746   2
  -2  -1   6 7.61549 4.08180   2
   1  -2  -6 1.41767 2.53528   4
  -2  -1   6 2.05839 2.40190   1
   2  -1  -6-2.15547 3.68403   2
  -2   1  -6 3.55813 2.90261   3
  -1  -2  -6 5.82069 4.27592   4
   1   2  -6 0.21674 2.16621   2
  -2   1   6 1.96986 2.83021   2
   1   2   6 5.99433 4.41922   1
   1  -2  -6 5.03480 3.91883   1
   1  -2   6 3.85440 2.11137   4
  -1   2   6 14.0935 5.33507   3
  -1  -2  -6 5.15454 2.66854   2
   1   2   6 15.6468 6.01029   3
  -1  -2   6 3.18113 3.07849   3
   1   2   6 9.09917 4.37774   2
   2  -1   6 5.35639 3.95744   4
   1  -2   6-0.17005 1.63491   3
   2  -1  -6 7.38179 4.13480   3
  -2   1   6 8.07714 4.17716   4
   2  -1   6 10.6316 3.99438   3
   2   1   6 3.67324 3.24813   3
  -1   2  -6 2.73349 2.94935   2
  -2  -1  -6 3.15933 3.25886   2
  -2  -1   6 7.55614 3.64452   3
   1  -2  -6 5.92627 3.34677   2
   1   2  -6 4.12754 3.44886   4
  -2   1   6 4.07427 2.95339   1
  -1  -2   6 2.13442 2.02116   1
   1   2  -6 6.79560 3.66872   3
   2   1  -6-0.39252 2.07406   1
  -2  -1  -6 2.35786 1.39955   1
   1  -2  -6 21.8652 7.27843   3
  -1   2   6 7.48562 4.02011   1
   2  -1   6 5.40134 4.34723   2
  -2   1  -6 9.02982 4.42146   2
   2  -1  -6 3.08196 2.61507   4
  -1   2  -6 0.22389 2.47514   2
  -1   2  -6-0.28378 1.63551   4
   1  -2  -6 2.42117 3.14693   2
   2   1  -6 2.06816 2.41055   2
   1  -2   6 3.79386 2.76960   1
  -1  -2  -6 6.02693 3.98011   3
   2   1   6 8.53962 2.87884   1
   2  -1   6 0.94040 1.61746   1
   2  -1  -6 4.61100 4.10309   1
   2   1   6 2.40068 2.42007   2
   2   1  -6 9.82532 4.29063   4
   2   1  -6 4.68667 2.85750   4
   2   1   6-3.61633 3.53166   4
  -2  -1  -6 3.76456 2.70046   3
  -1   2  -6 2.00849 1.49694   3
  -2   1  -6 0.99237 1.18870   1
  -2  -1  -6-5.79831 3.83098   4
  -2   1   6 1.44988 2.28442   3
  -1  -2  -6 1.87371 2.36747   1
   1   2  -6 7.09972 3.61049   4
  -1   2   6 4.85458 3.27160   4
   1   2   6 4.04465 3.91934   4
  -1   2  -6 2.49084 2.05758   1
   1   2  -6 15.7749 4.47982   1
  -2   1  -6 10.3116 4.39628   4
  -1  -2   6 9.89264 3.75426   2
   2   1  -6 4.63077 4.18578   3
   2  -1  -7 62.7551 9.22040   1
   2  -1  -7 53.8696 9.70347   3
  -2  -1  -7 53.8055 9.64452   4
  -1   2   7 97.8924 13.1456   3
   1   2  -7 52.5942 8.63001   3
  -1  -2   7 70.2913 9.02818   1
   1  -2  -7 74.4393 11.7253   3
   1  -2  -7 72.4931 10.6659   2
  -1   2  -7 59.0644 8.94428   3
  -2   1   7 91.3141 11.5089   4
   1   2   7 111.641 13.5271   3
   2  -1   7 57.3955 7.07556   1
   2  -1  -7 77.8479 10.4262   4
   2  -1   7 84.9020 10.8151   4
   1  -2   7 59.4179 9.34554   4
   1   2  -7 64.3561 9.50908   4
   1   2  -7 76.5669 10.4847   4
   2  -1  -7 61.9722 10.2581   2
  -2  -1   7 61.5197 9.16890   3
   1   2  -7 61.7796 8.40972   1
  -1  -2  -7 74.0393 11.0010   4
   2   1   7 96.7284 12.5074   4
  -2  -1   7 45.0500 8.10613   1
  -1  -2  -7 71.3833 11.0028   3
   1  -2  -7 77.4105 11.5929   1
   2   1   7 69.1199 10.4364   3
  -1  -2   7 76.6718 10.0223   3
  -2   1  -7 70.8026 10.6604   4
   2   1   7 79.7119 11.1206   2
  -2   1  -7 76.4589 9.85981   3
   1   2   7 56.1931 9.80817   1
  -2   1   7 87.4442 11.9585   1
  -2  -1  -7 62.7497 9.52309   2
  -2  -1   7 69.8461 9.66356   2
  -2  -1  -7 87.8611 11.2151   3
  -1   2  -7 55.9171 7.60182   1
  -2   1   7 49.3946 8.93316   3
  -1  -2  -7 91.8232 11.5096   2
   1  -2  -7 73.6750 10.3264   4
   2  -1  -7 90.2155 11.4906   2
   1   2   7 80.0146 11.2615   2
  -1   2  -7 64.2397 9.11306   4
  -1  -2   7 58.4225 9.39922   2
   2   1  -7 82.2328 10.7915   4
   2  -1   7 61.5558 9.01012   3
  -1  -2  -7 83.4781 10.8503   1
   2   1  -7 64.3301 9.01074   4
  -2   1  -7 71.0363 10.5283   2
   2   1  -7 70.2618 10.0863   3
  -2   1  -7 71.5268 8.49552   1
  -1   2  -7 88.1922 12.0020   2
   1   2  -7 40.3394 7.66596   2
   1  -2  -7 57.4516 9.68167   2
  -1   2   7 77.4897 10.9805   4
  -2  -1  -7 59.5783 8.47135   1
   1  -2   7 73.4729 8.75535   1
  -1   2  -7 66.4779 10.9088   2
   2   1  -7 68.4869 9.23083   1
   1  -2   7 61.2766 8.82944   3
   2   1  -7 69.0801 10.3696   2
   1   2   7 68.3083 10.8518   4
   2   1   7 68.4238 8.91360   1
   2   1   8 34.3553 8.28197   3
   2   1  -8 25.7615 7.10875   2
   2   1   8 43.6549 8.62805   2
  -1  -2  -8 16.6527 5.68102   4
  -2  -1  -8 33.9456 8.46667   3
   2   1   8 32.6621 7.29855   1
  -2  -1   8 39.1163 8.26701   1
   1   2  -8 29.7566 6.80408   1
   2  -1  -8 44.2803 9.48930   2
   1   2   8 24.8304 6.84352   3
  -1  -2  -8 30.0395 7.68363   1
   2   1  -8 25.1557 6.89435   4
  -2  -1  -8 32.1282 8.60356   4
   2  -1  -8 26.6198 6.93465   2
  -2  -1  -8 37.5172 7.62760   1
   1   2   8 24.0141 6.78572   2
   1   2  -8 24.4026 6.52795   4
   2  -1  -8 29.5020 7.20624   1
   1  -2   8 23.8760 5.92915   1
  -2  -1   8 36.8123 8.34485   3
   2   1  -8 27.5662 6.88362   4
  -2   1  -8 28.0335 5.63326   1
   2  -1   8 26.5393 5.60207   1
  -1   2  -8 35.0207 7.13050   3
   2  -1  -8 43.5726 8.88724   4
   1   2  -8 29.1048 7.05287   4
  -1   2  -8 39.7667 9.57328   2
   1  -2  -8 64.9634 12.3807   2
   2  -1   8 32.5218 7.76057   3
  -2   1   8 22.3686 6.06317   1
   2  -1  -8 47.2606 9.75673   3
   1   2   8 35.2212 8.92692   4
   2   1   8 41.3643 9.96604   4
   1  -2  -8 33.3252 7.96622   2
   1  -2   8 30.9164 7.19738   3
  -2   1  -8 33.7576 8.56920   4
  -1  -2  -8 23.5310 7.11404   2
  -1   2   8 35.8720 8.49726   1
  -2   1  -8 22.3267 6.73222   2
  -2   1   8 44.6810 8.98811   3
   1  -2  -8 28.2928 6.99438   4
   2   1  -8 26.4981 6.65305   1
   1   2  -8 21.4113 6.28804   2
  -1  -2   8 28.7095 7.24081   2
  -1   2   8 24.0509 7.01133   3
  -1   2  -8 45.5433 9.59982   2
  -2  -1  -8 21.5923 6.84870   2
   2  -1   8 32.4734 7.43087   4
  -2   1  -8 17.7013 4.72944   3
   1  -2   8 24.5702 6.83643   4
  -2  -1   8 24.6562 6.56490   2
   1  -2  -8 44.1709 9.98907   3
  -1  -2  -8 21.6082 6.90355   3
   2   1  -8 20.0284 5.86699   3
  -1   2   8 40.6145 9.15798   4
   1   2  -8 26.7117 7.11253   3
  -1   2  -8 26.7731 6.41355   4
  -2   1  -8 32.2335 8.15295   2
  -1  -2   8 30.5317 6.54222   1
  -2   1   8 27.6730 6.77151   4
   1  -2  -8 13.5490 5.09415   1
   1   2   8 40.8520 8.02623   1
  -1  -2   8 24.4117 6.00431   3
  -1   2  -8 29.2174 5.95010   1
   1  -2  -9 11.4914 5.34827   2
  -2   1   9 14.8202 6.01201   4
   1   2  -9 10.3247 4.75690   4
   1  -2  -9 11.1382 6.16828   3
  -2  -1  -9 14.7615 6.80745   3
   2  -1   9 13.9828 6.23113   4
   1   2   9 13.6972 6.01755   4
   1   2  -9 20.6464 6.64208   3
  -1   2  -9 17.1708 4.80310   1
  -1   2  -9 15.1702 5.82899   2
   2  -1  -9 52.3224 11.1301   3
  -2  -1   9 22.8581 6.85108   2
   2   1  -9 12.7410 5.83276   3
   1  -2  -9 8.05946 4.80512   2
  -2   1  -9 9.33232 6.02631   3
   1  -2   9 23.7595 7.11339   4
  -2   1   9 7.73044 6.20443   1
  -2   1  -9 13.4659 5.01592   2
   1   2  -9 7.51508 3.49758   1
   2   1  -9 23.5353 8.18149   2
   1   2  -9 33.1079 8.40267   2
   1   2   9 4.39975 2.37210   2
  -1  -2  -9 25.4782 6.83219   1
  -1  -2  -9 13.2215 6.10016   4
  -2   1  -9 26.3961 8.46988   4
   1  -2   9 6.73312 4.41075   3
   2   1  -9 29.5799 8.89632   4
  -2  -1  -9 16.0205 6.71359   2
   2   1   9 13.4824 5.49842   1
   1   2   9 20.9291 7.56261   1
  -2  -1  -9 26.8813 8.30772   4
  -1   2   9 10.4632 4.27647   3
   2  -1  -9 6.14950 4.53413   4
  -1   2  -9 24.5310 7.83879   4
  -1   2   9 14.3966 5.61112   1
  -1   2  -9 10.6385 6.79350   2
  -2  -1  -9 16.0313 5.15375   1
   2   1   9 16.9480 8.21821   3
  -2   1  -9 24.4522 7.41526   2
   2  -1  -9 38.9594 8.70403   2
   1  -2  -9 17.4051 5.78542   1
  -2  -1   9 10.7347 5.10311   3
   2   1  -9 19.0513 6.35812   1
  -2   1   9 27.2840 7.26117   3
   2  -1   9 9.63841 4.10652   1
   1   2  -9 23.1636 6.64212   4
   2  -1  -9 6.53733 3.09498   1
  -1   2   9 17.7927 5.83977   4
   1   2  -9 31.5637 9.73516   2
   1  -2   9 8.95907 4.14959   1
  -1   2  -9 9.51617 5.57391   3
   2   1   9 11.1340 4.42645   2
  -1  -2  -9 12.0530 5.97414   2
   2   1   9 24.2043 7.11690   4
   2  -1   9 17.4079 5.59905   3
  -1  -2   9 16.2246 5.85083   1
   2  -1  -9 10.0687 5.50667   2
  -1  -2   9 18.8836 5.97565   3
   2   1  -9 23.0908 5.96819   4
  -1  -2  -9 11.9729 6.25213   3
   1   2   9 22.0811 8.13188   3
  -2  -1   9 5.09935 3.10580   1
   1  -2  -9 25.9691 8.32773   4
  -2   1  -9 9.29780 4.10989   1
   1   2  10 93.1255 14.9203   3
  -1  -2 -10 74.0809 12.7695   2
   1   2 -10 72.7259 13.0257   2
  -1   2 -10 74.1817 12.1573   4
   1   2 -10 79.2637 13.3764   3
   2  -1  10 95.4647 13.3380   3
  -1  -2 -10 70.1238 13.2413   4
  -2   1 -10 52.8382 10.8327   2
  -1  -2  10 109.118 13.4895   1
  -1   2 -10 87.0069 14.9172   2
   1  -2  10 56.0936 9.35624   1
  -2   1  10 62.7409 11.8655   4
   2   1 -10 91.3953 13.4110   1
   2  -1 -10 78.6429 13.8426   3
  -1   2 -10 71.1403 11.9759   3
  -1  -2 -10 82.4347 13.8630   3
   1  -2 -10 90.5156 14.7175   3
   2   1 -10 82.0794 13.7272   2
  -2  -1  10 99.3170 14.2533   3
   2  -1  10 75.5801 13.0525   4
   2   1 -10 76.7870 13.4468   2
   2  -1  10 76.1722 10.4284   1
   2   1  10 73.3086 11.3486   1
  -1   2  10 71.4322 12.5685   4
   1   2 -10 67.2992 12.1794   4
   1   2  10 67.4822 12.7456   4
  -2  -1 -10 81.7553 13.8881   3
  -1  -2 -10 65.7678 11.8775   2
   2  -1 -10 86.8019 14.1966   2
   1   2 -10 84.0796 13.1461   4
   2   1  10 63.7068 12.6302   2
   2   1  10 91.7311 15.1940   4
  -1  -2 -10 84.0298 13.0418   1
  -1   2  10 73.1474 13.4472   3
   1  -2 -10 79.1524 13.2694   2
   2   1  10 79.3435 13.8149   3
  -1   2 -10 88.0282 12.4209   1
   2   1 -10 91.7306 14.0226   4
   2   1 -10 83.2997 13.4046   4
   1  -2 -10 59.7742 12.1393   1
   2   1 -10 81.7769 13.3561   3
   1  -2  10 62.5349 10.9118   3
  -1   2 -10 85.9217 13.8346   2
   2  -1 -10 84.4837 13.1781   4
  -2   1 -10 83.1488 12.7096   3
   2  -1 -10 66.2478 12.5249   2
   1  -2 -10 64.3082 11.9228   4
  -2  -1 -10 71.0420 11.3470   1
  -1  -2  10 91.9417 14.0045   3
   1   2  10 90.5429 14.7162   1
  -2   1  10 104.430 15.4886   3
   1   2 -10 91.6970 15.1754   2
  -2  -1  10 62.2563 11.0342   1
  -2  -1 -10 72.5758 13.0832   4
  -1   2  10 92.1029 14.7487   1
  -2  -1 -10 63.4391 12.3345   2
   1  -2 -10 71.0064 12.1171   2
  -2   1  10 66.1439 12.8081   1
  -2   1 -10 60.1145 11.8327   2
   1  -2  10 55.1784 11.1464   4
   2  -1 -10 70.6661 12.4190   1
  -2   1 -10 88.8804 11.7975   1
   1   2 -10 77.7754 12.1401   1
  -2   1 -10 86.0425 13.7073   4
  -1   2 -11 3137.10 79.7174   3
  -1   2  11 2505.82 78.6294   1
  -1   2 -11 2939.07 71.7393   1
  -1   2  11 3173.49 86.2072   4
   2   1 -11 3132.34 86.5959   2
  -1  -2  11 2925.40 74.4393   1
  -2  -1 -11 2977.82 74.5315   1
  -2  -1 -11 2721.14 79.1988   2
   1   2  11 2269.49 77.0870   4
  -2   1 -11 2612.14 73.9426   3
   2   1 -11 2995.16 80.0500   4
  -1   2 -11 3188.25 88.3635   2
  -2   1 -11 3152.79 84.1945   4
   2   1  11 3156.42 74.8251   1
   2   1  11 3002.30 85.5199   4
   1   2  11 2990.58 88.5613   3
  -2   1 -11 2844.44 84.9516   2
  -1  -2  11 2584.94 73.8088   3
   1   2 -11 3103.37 77.3611   1
   1  -2 -11 2891.72 81.5301   2
   1  -2 -11 2952.46 83.4516   2
  -2   1  11 3456.45 87.1940   4
   1   2 -11 2770.62 82.4943   2
  -1  -2 -11 2841.71 77.8517   1
   1   2  11 2514.72 74.8627   1
  -1  -2 -11 2989.65 82.7233   2
  -2  -1 -11 2902.56 83.5382   4
   2  -1  11 3046.57 68.4693   1
   2  -1 -11 3055.89 84.5297   2
   1   2 -11 3020.91 80.0343   3
   1  -2  11 3247.12 72.7636   1
   1   2 -11 2596.74 76.4199   4
   2   1  11 3193.14 87.9273   3
  -2  -1 -11 2556.24 80.3090   2
   2  -1  11 2492.15 74.6101   4
   1  -2 -11 2863.00 82.6544   1
   2  -1  11 2815.18 75.9213   3
   2  -1 -11 2954.52 82.3973   2
   2   1 -11 2891.31 77.7886   1
  -1  -2 -11 2906.59 84.0634   3
  -1   2 -11 2755.69 76.9715   4
  -2   1  11 2491.93 76.3959   1
  -1  -2 -11 3100.91 86.2889   2
  -1  -2 -11 2857.71 83.1228   4
  -2  -1  11 3277.71 84.8697   3
   1  -2  11 2453.13 70.8453   3
   2   1 -11 2869.68 79.6043   3
   2   1 -11 2910.35 81.5582   4
  -1   2  11 3157.84 89.8634   3
  -2  -1  11 2464.88 71.2505   1
   2  -1 -11 3246.91 87.1348   1
   1  -2 -11 2988.14 83.8157   4
  -2   1 -11 2840.74 69.7009   1
   1   2 -11 2962.20 79.0706   4
  -2   1  11 3014.14 83.2814   3
   2   1 -11 2373.40 75.8777   2
   2  -1 -11 3199.35 84.4153   4
   2  -1 -11 3100.85 86.7682   3
  -2   1 -11 2816.99 82.0428   2
  -2  -1 -11 2979.64 82.4985   3
   1  -2 -11 2882.51 85.3653   3
   1   2 -11 2896.72 83.3194   2
  -1   2 -11 2717.69 81.9793   2
  -2   1 -12 9.65479 5.22828   1
  -2  -1 -12 0.18031 3.99034   1
  -2  -1  12 16.1696 7.68010   3
  -1   2  12 9.62032 7.14327   1
  -1   2 -12 10.9659 5.44328   1
   2  -1 -12 14.7595 7.86887   2
  -2   1  12 6.36096 6.06812   1
   2  -1  12 22.0216 8.92669   3
   1  -2  12 0.39052 4.10175   3
   2  -1 -12 6.38248 5.96005   2
  -1  -2 -12 13.0229 9.46023   2
   2   1  12 21.6022 9.13358   3
  -1   2 -12-5.47637 5.43407   4
  -2   1 -12 3.63253 4.93748   3
   1  -2 -12 9.18391 6.36001   4
  -1  -2 -12 4.20232 4.60641   3
   1   2 -12 12.8015 6.81246   4
   2   1 -12 5.15071 4.91587   1
  -1   2 -12 8.64775 8.04022   3
  -2  -1 -12 1.99586 6.19967   2
  -1  -2 -12 3.41549 4.89902   1
   1  -2 -12 9.64360 6.76319   1
  -2   1 -12 12.8658 7.21804   2
  -1  -2  12 15.4188 7.82583   3
   2  -1  12 6.29400 4.49239   1
  -2   1  12 5.28260 5.66073   4
  -2   1 -12 23.1788 10.5034   2
   1  -2  12 13.3119 6.22570   1
   2   1  12 11.4652 5.57335   1
  -2  -1 -12 9.46681 9.24880   3
  -1   2  12 4.90732 5.70123   4
  -2  -1  12 1.58010 4.44296   1
  -1  -2 -12 8.90379 6.48976   2
  -1   2 -12 8.71341 7.16147   2
   2  -1  12 6.43104 3.75122   4
   2  -1 -12 12.5930 7.59969   3
  -2   1 -12 6.53562 5.65150   4
   2   1 -12 7.20060 4.94205   2
   2  -1 -12 12.6749 7.68786   4
  -2  -1 -12 13.4442 6.36932   4
  -1  -2  12 2.88738 3.10320   1
   2   1 -12 21.0733 9.08342   4
   1   2 -12 6.76930 7.94084   2
  -1   2 -12 5.73970 6.87427   4
   1  -2 -12 11.2857 8.47788   2
   2   1 -12 6.95254 6.47997   2
  -2  -1 -12 21.9637 8.97992   2
  -1  -2 -12 45.8026 17.6047   4
   2   1 -12 10.1279 5.61802   3
   2  -1 -12 8.44003 4.37817   1
  -1   2 -12 21.7291 9.99861   2
   1   2 -12 18.2087 9.48032   2
  -1   2  12 9.50987 8.71266   3
   1   2 -12 3.89021 3.98773   1
   1   2  12 7.45471 6.45018   3
   1  -2 -12 11.2812 9.21203   2
  -2   1  12 2.69864 4.50571   3
   1   2  12 11.5476 7.10871   1
   1   2  12 3.50068 5.35782   4
   1  -2 -12 21.9240 8.53948   3
   1   2 -12-0.81324 3.09659   3
   1   2 -12 11.1124 6.62591   4
   2   1 -12-3.91634 4.45480   4
   2   1  12 11.2525 6.85109   4
  -1   2 -13 482.713 34.4271   3
   1  -2 -13 459.007 37.0628   3
   2   1  13 394.890 34.0561   3
   1   2  13 463.895 37.8172   3
   1   2 -13 433.223 34.6299   4
   1  -2  13 474.121 34.6240   3
  -1  -2 -13 486.874 36.2248   2
  -2  -1  13 478.904 34.5560   1
   2   1 -13 508.271 38.0808   2
  -2  -1 -13 377.542 33.7676   2
   2   1 -13 446.446 36.8293   2
  -1   2 -13 482.295 35.9215   4
   1   2 -13 483.489 35.3461   3
   1   2  13 470.903 37.6423   4
   2  -1 -13 416.265 34.4942   2
   2  -1 -13 499.938 36.6070   4
  -1   2  13 423.827 34.8968   1
   1   2  13 454.574 34.9396   1
   2  -1 -13 477.899 35.8569   1
   2   1 -13 492.674 36.6177   4
   2  -1  13 507.811 36.0422   3
  -2   1  13 458.215 34.9944   4
  -2  -1  13 499.275 36.4440   3
  -2  -1 -13 497.659 33.4121   1
   1  -2 -13 389.975 34.2552   2
   2  -1  13 414.944 33.7102   4
   2   1 -13 406.863 33.3971   3
  -2   1 -13 524.816 38.2526   4
   1  -2 -13 407.373 32.3772   2
  -2   1 -13 424.072 29.9672   1
   1   2 -13 281.058 31.2113   2
  -1   2 -13 491.739 36.5543   4
  -2   1 -13 492.469 35.2507   3
  -2   1 -13 508.208 38.7085   2
   1   2 -13 563.568 38.0430   4
   2   1  13 561.759 40.3684   4
  -1  -2 -13 422.995 35.4325   4
  -1   2  13 490.596 38.6677   3
  -1   2 -13 433.985 30.6281   1
  -2   1 -13 511.294 38.3026   2
   2   1 -13 406.777 32.8504   4
  -1  -2 -13 426.409 35.3599   2
   2  -1 -13 556.495 39.3392   2
   2  -1  13 528.720 31.8771   1
  -1   2 -13 446.743 36.1617   2
  -2  -1 -13 465.353 37.1053   4
   1   2 -13 426.986 32.0386   1
   1   2 -13 481.408 37.9306   2
  -2   1  13 461.807 35.7175   1
   2   1 -13 417.963 32.6307   1
  -1  -2 -13 561.278 37.5077   1
  -2  -1 -13 468.821 37.6608   2
  -1   2  13 427.726 34.6916   4
   2  -1 -13 486.433 37.0489   3
  -1  -2  13 399.435 30.0471   1
  -2   1  13 430.959 35.1467   3
  -1   2 -13 538.868 40.1498   2
   2   1  13 446.842 31.3352   1
   1  -2 -13 410.361 34.5633   1
  -2  -1 -13 479.056 36.8996   3
   1  -2  13 539.221 32.9690   1
  -1  -2  13 481.389 35.5494   3
  -1  -2 -13 511.286 38.4001   3
   1  -2 -13 446.378 35.7797   4
  -1   2 -14 38.4298 12.6075   2
  -1   2 -14 30.8956 11.0734   4
   1  -2 -14 13.3337 7.29599   2
  -2  -1 -14 25.9036 11.5420   2
  -1   2 -14 19.9318 9.23369   3
   2  -1 -14 30.4646 11.5686   3
  -1  -2  14 9.87777 6.83702   1
  -2   1 -14 25.8679 10.5078   3
   1   2 -14 23.1558 8.98139   2
   2   1 -14 22.8612 9.79003   4
   1  -2 -14 23.8565 10.0987   2
  -2   1  14 20.6016 11.0425   4
  -1  -2  14 11.7749 7.12029   3
   2   1  14 29.9267 9.55073   1
  -1   2 -14 7.60793 7.11739   1
   2   1 -14 24.8530 10.1085   3
  -2   1 -14 26.3247 12.2071   4
   1   2 -14 29.8256 12.4299   2
  -2   1  14 11.2792 6.54378   3
  -1  -2 -14 27.9843 10.6206   1
   2  -1 -14 11.9734 7.72942   2
   1  -2  14 34.9813 10.4710   1
  -2  -1 -14 18.2487 9.53864   4
  -1   2  14 21.1516 10.3385   1
  -1   2  14 23.7186 10.9789   4
   1  -2  14 18.3824 9.25049   3
  -1  -2 -14 16.5706 9.76377   2
   2   1 -14 21.7564 9.93102   4
   1  -2 -14 18.8662 10.3327   4
  -1   2  14 38.1059 12.6323   3
   2  -1 -14 14.3415 10.2379   2
   2   1  14 7.88809 8.56971   3
   1   2  14 9.10966 7.27696   1
  -1  -2 -14 8.32053 7.67495   4
   2   1  14 31.1782 13.4685   4
   2   1 -14 23.8486 11.7345   1
  -2   1 -14 34.6668 13.5605   2
   2  -1  14 18.5045 10.5535   3
   2  -1  14 24.3870 8.47207   1
   1  -2 -14 32.0546 12.1413   1
  -1  -2 -14 19.0619 8.54501   2
  -2   1 -14 29.2794 11.0136   1
  -1   2 -14 14.3072 9.32414   4
  -2  -1 -14 22.6852 10.1340   2
  -2  -1  14 9.10699 9.42964   3
   1   2  14 19.2836 10.3573   3
  -2  -1  14 22.7912 11.0396   1
  -1   2 -14 15.5087 9.85469   2
   1  -2 -14 19.3694 10.7759   3
   2  -1  14 40.3833 13.0369   4
   2  -1 -14 26.1924 11.0778   4
  -2  -1 -14 20.6144 9.23807   3
  -1  -2 -14 23.9415 11.2728   3
   1   2 -14 16.9510 9.00016   1
   1   2 -14 15.0473 11.2673   4
   2   1 -14 18.2403 9.35505   2
  -2   1 -14 19.2998 9.73814   2
   2   1 -14 41.9837 13.1892   2
   1   2  14 19.1027 10.7130   4
   1   2 -14 49.2490 14.1321   3
   1   2 -14 36.5720 13.0369   4
  -2  -1 -14 19.8042 8.64418   1
  -2   1  14 34.1414 11.4947   1
   2  -1 -14 19.7143 9.41871   1
   2  -1 -15 162.208 24.7291   4
   1  -2 -15 169.562 24.8759   2
   2  -1  15 115.684 19.7496   3
   2  -1 -15 162.689 24.4020   4
  -1   2 -15 193.646 26.7838   2
   1   2 -15 138.498 23.1278   2
  -1  -2 -15 141.417 21.6750   2
  -1   2 -15 217.569 27.0726   3
  -2  -1 -15 193.853 25.6858   3
   2  -1  15 197.754 21.7809   1
   2  -1 -15 174.446 25.6167   2
   1  -2 -15 186.921 25.1575   2
   1  -2 -15 164.853 24.3536   4
   1   2  15 232.007 30.1381   3
   1  -2  15 142.831 20.9952   3
  -1  -2 -15 145.611 21.8254   1
   1   2 -15 163.284 24.4770   2
  -1   2 -15 174.633 25.0065   4
  -2   1 -15 163.206 24.5106   2
   2   1 -15 159.785 23.2883   4
   2   1 -15 195.852 26.1503   2
   2   1  15 160.456 24.6576   4
   2  -1 -15 188.292 24.7027   2
   1   2  15 172.041 25.6073   4
  -2   1 -15 173.355 20.9289   1
  -1   2 -15 168.651 24.3635   4
   2  -1  15 170.445 24.3897   4
  -1  -2  15 149.737 21.9801   3
  -2   1 -15 167.275 23.2152   3
   1   2  15 162.053 22.5119   1
  -2  -1 -15 205.634 26.8576   2
  -1   2 -15 207.088 23.7173   1
   2   1  15 160.276 20.8059   1
   2   1 -15 193.366 25.7380   4
   2   1 -15 161.749 23.5629   3
   2   1  15 194.691 26.6540   3
  -1  -2 -15 164.058 23.9503   2
   2   1 -15 170.088 24.5179   2
  -1   2  15 195.786 26.2409   4
  -2   1 -15 205.550 27.4310   2
  -2  -1  15 178.604 24.3537   3
   2   1 -15 191.247 25.0960   1
  -1  -2 -15 182.588 26.1699   3
  -2   1 -15 152.143 24.6155   4
  -1  -2  15 138.179 20.1911   1
   2  -1 -15 170.677 25.1247   3
  -1   2 -15 181.364 25.8469   2
   1  -2 -15 189.149 27.3379   3
  -2  -1 -15 200.121 28.2657   4
  -2  -1 -15 195.820 23.3487   1
  -1  -2 -15 138.391 22.2623   4
  -1   2  15 232.207 28.0460   1
   1   2 -15 115.041 20.3347   3
   1   2 -15 190.290 25.3851   4
  -2  -1 -15 174.837 24.7569   2
  -2  -1  15 230.291 26.8529   1
  -1   2  15 145.247 23.2756   3
  -2   1  15 170.658 23.6756   1
   1  -2 -15 168.168 24.8133   1
   1  -2  15 222.927 23.7560   1
   1   2 -15 167.208 22.1564   1
  -2   1  15 110.265 19.9576   3
   1   2 -15 166.768 23.1128   4
   2  -1 -15 210.225 26.7931   1
   2  -1 -16 23.8035 11.9381   2
  -1  -2 -16 6.79411 8.93295   4
   1   2 -16 32.2575 12.4426   3
   1   2  16 16.9027 12.0607   4
   1   2 -16 24.6552 11.2271   4
  -1  -2 -16 23.8042 11.3089   3
   2  -1 -16 24.3838 11.5203   4
  -1   2 -16 14.7616 10.0933   4
   2   1 -16 6.36442 7.90264   4
  -2   1 -16 25.4010 11.4425   2
   2   1  16 9.55791 10.2255   3
   2   1 -16 15.1638 9.15781   1
  -1  -2  16 24.8111 11.2937   3
   2  -1  16 21.6423 9.90646   1
   2  -1 -16 15.6008 11.3233   3
   1  -2 -16 10.5864 9.87253   1
  -2   1  16 11.5527 8.15398   3
  -1   2 -16 13.0480 9.46498   3
   1  -2  16 10.4625 7.35031   1
   1   2  16 33.9196 14.4175   3
   2   1  16 28.9206 10.8527   1
   1  -2 -16 34.8412 13.1563   2
  -2  -1 -16 22.3091 11.3865   4
   1  -2 -16 23.0024 12.7667   4
   1   2 -16 38.5325 17.0831   2
  -2   1 -16 24.1807 11.7005   3
  -2  -1  16 14.8039 9.51024   1
   1   2 -16 15.7823 10.2273   4
   2  -1 -16 18.5998 10.6234   4
  -1  -2  16 18.2801 9.96826   1
   2   1 -16 37.3739 13.9240   3
   1  -2 -16 18.5953 12.2266   3
   1   2 -16 14.0305 9.72806   2
  -1   2 -16 22.5073 12.8263   2
  -2  -1 -16 40.4594 13.5725   1
  -1   2  16-0.93483 5.86489   4
  -2   1 -16-1.66811 7.13774   2
   2  -1 -16 34.3881 12.7473   2
   2  -1 -16 18.0534 11.5360   1
   2   1  16 18.3976 11.6085   4
   1  -2  16 26.7985 10.6255   3
   1  -2 -16 21.7392 11.1476   2
  -1  -2 -16 17.0122 11.3792   1
  -1   2  16 27.5485 12.8382   1
   2   1 -16 56.2368 15.7210   4
  -1   2 -16 19.5511 12.5569   2
   2  -1  16 12.2430 8.12974   3
  -1  -2 -16 23.8794 12.8438   2
   1   2  16 8.97129 7.91744   1
  -1   2 -16 41.3091 12.8380   1
  -1   2  16 29.4612 13.6632   3
  -2   1  16 12.9804 10.5012   1
  -1  -2 -16 17.8053 8.95119   2
  -1   2 -16 22.8404 12.7813   4
  -2  -1 -16 5.18778 7.85870   2
  -2  -1 -16 29.0787 13.3766   3
  -2   1 -16 21.0097 12.8586   4
   2   1 -16 18.7325 10.6720   2
  -2  -1  16 22.3728 11.5954   3
   2   1 -16 33.4637 13.8221   2
  -2  -1 -16 39.5628 13.2190   2
   1   2 -16 19.5619 12.7439   1
  -2   1 -16 35.4137 11.7707   1
   2   1 -17 417.298 39.5476   4
  -1  -2 -17 429.981 43.1245   2
   2   1 -17 427.282 41.6145   4
   1  -2 -17 383.823 38.8675   2
   1   2 -17 462.149 39.3155   1
   2   1  17 421.502 36.1265   1
  -1   2  17 353.873 37.5690   1
  -2   1 -17 456.005 43.1889   2
  -1   2 -17 393.086 38.3892   3
   1  -2 -17 349.440 37.0512   1
  -2   1 -17 331.619 32.7480   1
   2  -1 -17 393.656 38.7254   2
   1   2 -17 429.649 42.4987   2
  -2  -1  17 394.189 39.2556   3
  -1  -2  17 440.648 38.9221   1
   1   2 -17 345.112 37.2316   4
  -1  -2 -17 422.333 41.2557   4
   1   2 -17 507.494 44.6168   4
   1   2  17 474.543 39.9827   1
  -2  -1 -17 432.432 41.9099   3
  -1  -2 -17 406.979 39.4801   2
   1  -2 -17 404.259 39.5321   4
   2  -1 -17 398.421 40.9358   3
  -2   1 -17 404.974 39.7121   3
  -2  -1 -17 455.820 43.1796   4
  -2   1  17 429.181 41.3740   3
   2   1  17 412.790 40.8050   4
   1   2 -17 381.621 37.8962   3
  -1   2 -17 422.004 36.1360   1
   2   1 -17 388.631 37.3380   1
   1   2 -17 391.720 40.3059   2
  -2  -1 -17 446.369 38.8636   1
   2   1  17 370.862 39.6125   3
  -1   2 -17 485.735 44.4547   2
   1  -2 -17 318.646 36.5378   3
   1   2  17 414.961 41.8006   3
   2  -1  17 418.742 35.0070   1
  -1  -2 -17 476.656 40.4101   1
  -1  -2  17 329.264 34.9604   3
   2   1 -17 382.062 38.2375   3
  -2   1  17 375.462 38.6296   1
   1  -2 -17 444.577 41.8572   2
  -1   2  17 418.645 41.9559   3
   1  -2  17 327.862 31.8711   1
  -1   2 -17 489.194 45.3391   2
  -1   2  17 437.832 41.6033   4
   2  -1 -17 385.479 39.5217   4
  -1   2 -17 472.512 43.9304   4
   2  -1  17 410.862 38.4217   3
   1   2  17 360.824 39.0225   4
   2   1 -17 405.282 40.5108   2
   2  -1 -17 388.463 39.1939   1
  -2   1 -17 434.848 42.0275   2
   2  -1 -17 378.495 40.1176   4
  -1  -2 -17 446.744 43.1220   3
  -2  -1 -17 366.273 38.5227   2
  -2  -1  17 434.430 39.2853   1
   2  -1 -17 390.935 39.5470   2
  -2  -1 -17 367.290 37.9219   2
  -2   1 -17 421.298 41.1412   4
  -2   1 -17 388.253 39.8444   4
   2   1 -17 367.512 37.8526   2
  -1   2 -17 505.574 43.4568   4
   1  -2  17 370.467 36.9745   3
   2  -1  18 18.5845 11.6613   1
   2  -1 -18 48.1767 19.8761   4
   1  -2 -18 22.5685 12.8233   1
   1   2  18 27.9670 15.9205   3
  -2   1  18 15.4721 11.5714   1
   1  -2 -18 38.4968 16.6261   3
  -2  -1 -18 13.4354 13.7603   4
   2  -1 -18 39.5939 15.7689   1
   1   2 -18 7.72642 11.3555   4
   2  -1 -18 42.5923 17.8718   3
   2   1 -18 9.68832 10.3276   4
  -1   2 -18 18.8861 14.0485   2
  -2   1 -18 39.2464 15.6479   4
   1   2 -18 27.9634 14.9359   2
   1   2 -18 23.6507 14.5086   2
   2  -1 -18 25.4994 15.2944   2
  -1   2  18 14.3972 11.3633   3
  -2   1 -18 29.8913 12.8025   1
   1   2 -18 21.6919 15.2348   3
  -2  -1 -18 25.0968 14.9841   3
  -2   1 -18 7.22890 11.5419   4
   1   2  18 12.6748 12.2812   1
  -2  -1  18 11.7317 11.4847   3
  -1  -2  18 16.8833 10.2531   3
   1  -2 -18 15.2498 12.3541   4
   1  -2  18 13.6202 10.2835   1
   2   1 -18 25.8302 15.3310   3
   2   1 -18 12.5147 10.2422   1
  -2  -1 -18 28.3911 13.3260   2
  -1  -2 -18 25.0220 13.9024   4
  -1  -2 -18 18.8881 12.6403   1
   2   1  18 15.4343 10.8694   1
   1  -2  18 19.9407 11.6940   3
  -1   2 -18 32.4222 13.5519   1
  -1   2 -18 14.3651 14.5817   2
   2   1 -18 8.63462 9.75662   2
   1  -2 -18 39.8121 16.6144   2
   1   2  18 16.5537 13.3436   4
  -1  -2 -18 25.2924 14.2408   2
  -1   2 -18 2.97694 12.0396   4
   2  -1 -18 53.4063 17.3417   4
   2   1  18 21.6135 13.0839   4
  -1   2 -18 68.8312 19.3257   4
  -2   1 -18 35.2228 16.5101   2
   1  -2 -18 30.9766 13.8866   2
  -2   1  18 25.7544 13.4436   3
  -1  -2  18 24.6535 13.2939   1
  -2  -1 -18 36.3987 17.0228   2
  -2  -1  18 10.5300 11.1434   1
  -2   1 -18 23.9852 15.3625   3
   2   1 -18 42.6221 17.8520   2
   2  -1 -18 25.0497 15.1434   2
  -2   1 -18 19.9779 13.9222   2
  -1  -2 -18 6.53560 10.8077   2
   2   1  18 23.5885 13.5469   3
   1   2 -18 45.1320 19.1478   4
  -1   2  18 21.8629 12.4708   1
   2  -1  18 15.2014 14.0557   3
  -2  -1 -18 23.2469 12.3453   1
  -1   2 -18 51.9135 17.6031   3
   1   2 -18 30.4658 13.8028   1
   2   1 -18 15.2776 12.2149   4
  -1  -2 -18 38.0924 16.4371   3
   2  -1 -19 743.150 60.2636   2
  -2   1 -19 862.201 64.2448   4
   2   1 -19 948.553 67.0287   4
   1  -2 -19 960.337 66.6373   4
  -2   1 -19 788.212 62.4108   2
   1  -2 -19 919.350 67.1928   3
   2  -1 -19 897.658 65.0984   3
   2   1  19 1089.83 62.9374   1
   2   1 -19 943.471 66.7667   2
   2  -1 -19 901.461 62.4415   1
   1  -2  19 1007.69 65.8078   3
  -2  -1  19 1001.39 64.9063   1
  -1   2 -19 1042.84 68.7083   2
   2   1  19 937.034 66.8401   4
   2   1  19 923.437 65.9534   3
  -1   2 -19 878.017 58.3359   1
  -2   1 -19 879.390 56.3796   1
  -2  -1  19 912.618 64.5398   3
   1  -2 -19 910.612 62.8288   2
   1  -2 -19 943.774 65.3744   2
  -2   1 -19 949.008 66.2461   4
  -1  -2 -19 921.985 66.7081   4
  -1  -2  19 861.344 58.0206   1
  -2  -1 -19 794.804 61.4027   3
   1   2 -19 921.009 65.2974   2
   2   1 -19 1035.49 65.5269   1
  -1   2 -19 822.701 60.8080   4
  -2   1 -19 1025.76 66.1601   3
  -1  -2 -19 900.198 62.5073   2
  -1  -2  19 974.419 65.1981   3
  -1  -2 -19 916.145 64.2576   2
   2  -1 -19 870.134 64.2825   4
   1   2 -19 950.475 67.8376   2
   1   2 -19 778.304 59.6998   3
   2  -1 -19 856.774 63.0727   4
   2  -1  19 955.159 57.5452   1
   1   2 -19 974.134 62.8170   1
  -2   1  19 827.888 61.1281   1
  -2   1  19 951.784 67.6337   3
  -1   2  19 1014.00 70.7166   3
  -2   1 -19 1019.53 68.3086   2
  -1   2  19 816.320 60.0821   1
   1  -2 -19 875.187 64.7878   4
  -2  -1 -19 1067.68 69.3924   2
  -1  -2 -19 856.570 58.1105   1
  -1   2 -19 980.973 67.7617   2
   1   2 -19 982.998 67.7293   4
   2  -1 -19 971.810 64.8569   2
   2   1 -19 933.874 64.9365   3
   1   2  19 890.586 65.7139   3
   2  -1  19 1009.55 65.4361   3
   1   2 -19 896.553 65.5977   4
  -1  -2 -19 785.127 62.0698   3
   1   2  19 1013.98 64.0270   1
  -2  -1 -19 983.865 65.7770   2
   1  -2 -19 981.409 64.9659   1
   2   1 -19 951.856 64.2562   2
  -2  -1 -19 993.439 60.8803   1
  -1   2 -19 993.527 69.0611   4
  -1   2 -19 1086.15 68.3730   3
  -2  -1 -19 943.717 65.3066   4
   2   1 -19 979.948 67.1379   4
   1  -2  19 910.522 56.7339   1
   1   2  19 917.489 65.8858   4
  -1   2 -20 13.6305 13.7622   1
  -1  -2 -20 15.9042 17.0083   3
   1  -2 -20 18.9374 19.0969   3
  -1  -2 -20 0.41478 10.1814   2
  -2  -1 -20 21.7014 15.2027   2
  -1   2 -20 24.5215 18.8679   4
   1   2  20 1.86641 12.3069   1
  -2   1 -20 2.83306 15.7798   3
  -1  -2 -20 17.4090 17.5510   4
  -2  -1 -20 17.8601 14.8298   1
   1  -2  20 6.32269 13.0428   3
  -2   1 -20 10.2514 13.0450   2
   1  -2 -20 5.53453 13.7482   4
   1  -2 -20 3.68653 13.1263   2
   2   1  20 10.5466 12.3089   1
   1   2 -20 25.5378 14.9728   2
  -1  -2 -20 10.6929 13.4947   1
   2  -1 -20 4.33808 14.2025   3
  -1  -2  20 11.8586 12.3182   1
  -1   2 -20 15.7478 16.0701   2
   1  -2 -20 23.5649 16.6839   1
   2  -1 -20 20.5846 15.2713   1
   2   1  20 1.30782 11.6188   3
  -2   1  20 6.11679 13.8160   3
   2  -1  20 25.6971 14.5330   1
   2  -1 -20 5.22446 12.7195   4
   1  -2 -20 17.5494 15.9560   2
  -2  -1  20 6.28049 14.3651   1
   1   2 -20 27.0890 19.4684   4
   2  -1 -20 35.8148 19.3822   2
   2   1 -20 18.0824 20.4858   4
  -1   2  20 4.06516 14.1397   3
  -1  -2 -20 41.1311 20.3280   2
  -2  -1 -20 4.67615 14.5731   4
   2   1 -20 6.44826 13.6148   2
  -2  -1 -20 10.4365 12.8863   3
   1   2  20 15.2917 14.8588   3
  -2   1 -20 14.5791 14.2562   2
   2   1 -20 9.52002 14.0811   1
   1   2 -20 9.44239 13.3213   4
   2  -1 -20 5.13726 11.7284   2
   2   1 -20 42.0591 17.7427   2
   1   2 -20 27.3049 19.4406   3
   2   1 -20 24.5623 15.3873   4
   2   1 -20 19.0270 16.4862   3
   2  -1 -20 0.42427 11.3129   4
   1   2 -20-0.43727 12.0615   2
  -2   1 -20 2.99200 11.1006   4
  -1  -2  20 6.87428 14.0673   3
  -1   2 -20 22.3180 17.6794   3
   1  -2  20 13.7777 12.6082   1
  -2  -1 -20 6.42371 12.0575   2
   1  -2 -20 40.1753 17.9118   4
  -1   2 -20 0.86533 11.3535   4
  -2  -1  20 10.3728 14.7088   3
  -1   2 -20 7.02510 14.3002   2
   2  -1  20 9.25546 14.5438   3
  -1   2  20 3.62883 10.9875   1
  -2   1  20 9.65771 12.2454   1
  -2   1 -20 42.0371 20.2737   4
   1   2 -20 21.2274 14.8488   1
  -2   1 -20 11.8711 12.0709   1
   2  -1 -21 35.0697 19.2571   2
   1  -2 -21 9.98448 15.2173   2
  -2  -1 -21 29.1269 18.8689   4
  -1  -2 -21 4.44331 12.1055   2
  -2   1 -21 0.94156 12.8844   4
   2  -1 -21 61.0129 23.2705   3
  -1  -2 -21 24.1299 14.5668   1
  -2  -1  21 2.23736 14.0942   3
  -2  -1 -21 17.1324 16.1250   4
  -1  -2 -21 28.3605 18.5370   4
  -1   2  21 3.86040 13.7276   1
   1   2 -21 7.64680 15.1955   4
  -1   2  21 1.92488 15.4582   3
  -2  -1 -21 55.9585 21.5350   2
   1   2  21 19.0446 14.8191   1
  -2  -1  21 0.83500 13.6746   1
   2  -1 -21 10.5651 14.7126   2
  -2  -1 -21 31.1883 20.7672   3
   1  -2 -21 33.2337 18.8212   3
   2   1 -21 9.58838 16.8974   2
   1   2 -21 29.7930 21.6736   4
   2  -1 -21 4.20081 14.8217   4
   2  -1  21 8.18820 13.0142   1
   1  -2 -21 4.13097 11.3503   2
  -2   1 -21 23.8843 19.2373   2
  -1  -2  21 7.86010 16.5434   3
  -2   1 -21 3.19271 15.4984   4
  -1   2 -21 16.3762 19.1515   2
  -1   2 -21 20.0725 16.9966   4
  -1  -2  21 13.8959 13.4598   1
   1   2 -21 76.9218 26.9018   3
   1   2 -21 38.1114 18.8875   1
  -2   1  21 9.38996 16.5929   3
  -2   1 -21 19.4630 15.6124   1
  -2  -1 -21 24.5257 16.4003   2
  -2   1 -21 17.0011 18.6709   3
  -1   2 -21 42.2641 20.5530   3
   1  -2 -21 11.6064 17.6924   4
  -1  -2 -21 25.0761 18.3027   3
   2  -1 -21 16.4674 18.4264   1
   1  -2  21 36.3439 18.6193   3
  -2   1 -21 13.4557 15.1114   2
  -1   2 -21 12.4788 15.4383   4
   2   1  21 16.3171 15.1305   1
   2  -1 -21 20.4442 18.8667   4
   2  -1  21 9.11262 14.6817   3
  -1   2 -21 41.9684 20.4453   2
  -1  -2 -21 40.8933 20.5710   2
   2   1 -21 6.47248 16.1321   4
   1  -2 -21 22.6293 15.2704   1
   2   1 -21 10.0036 16.3378   3
  -1  -2 -21 35.2842 20.1529   4
   1   2  21 46.2359 23.2525   3
   2   1 -21 0.44985 14.0001   4
  -2  -1 -21 28.7876 15.9703   1
  -1   2 -21 22.6944 17.0132   1
  -2   1  21 0.42857 12.3003   1
   2   1 -21 3.50063 11.9275   2
   1  -2  21 23.0668 15.0925   1
   1   2 -21 10.7032 15.9787   2
   2   1  21 23.2344 17.0061   3
  -2  -1  22 77.8234 28.0570   3
  -1  -2 -22 27.5635 20.9925   4
   1   2 -22-0.49395 13.9980   2
  -1   2  22 25.4762 23.6349   3
   1   2  22 1.26603 14.4979   1
  -1   2  22-0.45370 15.2925   1
   1   2 -22 7.76361 15.7062   4
   2   1 -22 20.1082 16.5390   1
  -2  -1  22 18.5655 17.9384   1
  -2  -1 -22 31.5988 20.9183   4
  -2   1 -22-0.50398 17.2064   4
  -1  -2 -22 7.61373 13.9647   2
   1   2 -22 25.5449 20.5612   4
   1  -2 -22-0.45874 14.5195   2
  -1   2 -22-0.49414 17.8218   4
  -2  -1 -22 11.8659 17.6693   3
  -2   1 -22 7.46035 18.4656   3
  -2   1 -22 5.94723 16.6967   2
   1  -2 -22 44.7043 22.9531   4
   2  -1 -22 26.8182 21.4937   3
   1  -2 -22 3.94796 17.5886   4
  -1  -2 -22 25.7597 19.4673   4
  -2  -1 -22 19.6862 18.9361   2
  -1   2 -22 1.48298 15.3886   2
   2   1 -22 17.0107 18.4354   4
   2  -1  22 0.46501 15.1686   3
  -1  -2 -22 30.5293 19.5670   3
  -1   2 -22 22.9529 22.1585   4
   2  -1 -22 11.6169 19.6379   4
   1  -2  22 16.1724 16.4539   1
  -1  -2  22 10.8383 15.9570   3
   2  -1 -22 24.2185 20.2196   4
   2  -1  22 2.21574 15.0516   1
   1  -2 -22 15.4141 18.5899   3
   1  -2 -22 4.36252 16.1356   2
  -1   2 -22 18.4027 17.7217   1
  -2  -1 -22 1.93930 14.1959   2
  -1   2 -22 10.2820 16.9482   3
   2   1 -22 34.3630 20.7468   4
   1  -2 -22 6.04290 16.8475   1
   2   1 -22 22.1222 17.4456   2
   1  -2  22 16.5445 19.0113   3
  -2   1 -22 11.5370 18.4905   2
   2   1 -22 1.94332 15.0266   3
   1   2 -22 7.68477 17.8801   3
   1   2  22 57.6010 26.2935   3
  -1   2 -22 1.40118 16.4626   2
   2  -1 -22 16.8614 18.6268   2
  -2   1  22 4.99275 16.2960   3
  -2   1 -22 22.3297 19.5891   4
  -1  -2 -22 0.47140 14.4073   2
   2  -1 -22 8.88462 17.4079   2
   2   1 -22 9.68269 20.0073   2
  -1  -2  22 8.76351 17.5221   1
  -1  -2 -22 10.4775 15.8022   1
  -2  -1 -22-0.50358 17.0316   4
  -2  -1 -22 2.21604 13.6917   1
  -2   1  22 11.4954 16.8230   1
  -2   1 -22 7.15473 15.5734   1
   2   1  22 3.56920 13.6296   1
   2   1  22 12.4050 17.6569   3
   1   2 -22 5.47344 15.8706   1
   2  -1 -22 2.69436 15.3258   1
   1   2 -22 11.6296 19.0361   2
   2   2   0 1142.79 25.4147   2
   2   2   0 928.176 19.0937   1
  -2  -2   0 1073.65 22.2251   3
  -2  -2   0 1071.69 20.5005   1
  -2  -2   0 1167.31 25.3337   4
   2   2   0 1250.58 26.2276   4
   2  -2   0 1018.40 21.9970   1
   2   2   0 1195.53 23.2771   3
  -2   2   0 1175.31 18.8526   3
  -2  -2   0 1105.84 25.1238   2
  -2   2   0 1105.36 22.7030   1
   2   2   1-1.08077 1.09458   4
   2  -2   1 0.09153 0.83784   1
  -2   2   1-0.36448 0.49985   2
  -2   2   1 3.36452 1.16653   4
  -2  -2  -1-0.60397 0.68807   1
   2   2  -1 4.88588 2.35453   4
   2   2   1 5.99436 1.93838   2
   2   2  -1-1.34315 1.56381   3
   2   2  -1-0.56341 1.19354   1
  -2  -2  -1 1.79780 1.56345   4
  -2  -2   1-0.94567 1.35682   3
  -2   2   1-3.27278 2.24816   1
  -2  -2   1 2.43928 2.20529   2
  -2  -2  -1 2.65268 2.23833   2
   2  -2  -1-1.15588 2.24896   3
  -2  -2   1 0.74867 1.06560   1
  -2   2  -1 11.6975 2.38214   1
  -2  -2   1 2.68276 2.10555   4
   2  -2   1 0.83418 0.59977   3
  -2   2   1 4.25516 1.73702   3
   2  -2  -1 0.44363 0.75062   4
   2   2   1-3.12957 1.82625   1
   2  -2  -1-1.51106 1.34681   1
  -2   2  -1 1.08420 0.61493   2
   2   2   1 3.80198 1.80637   3
  -2  -2  -1-0.04241 1.56978   3
   2   2  -1-0.52255 1.46394   2
  -2   2  -1 0.26591 0.81349   3
  -2   2  -2 373.211 11.2250   4
  -2   2   2 426.283 17.1680   3
   2   2   2 414.727 17.4246   4
  -2   2   2 410.844 13.4058   4
  -2  -2   2 364.189 14.0223   1
  -2  -2   2 379.651 15.1707   4
   2  -2   2 384.038 13.2090   2
  -2   2  -2 406.636 10.7400   3
   2   2  -2 357.936 13.9129   1
  -2   2   2 393.001 18.8733   1
   2   2  -2 423.232 15.8638   4
  -2  -2  -2 391.118 15.4059   3
   2  -2  -2 390.448 17.1288   3
   2   2   2 392.433 15.9930   2
  -2  -2  -2 378.574 15.7715   2
   2   2  -2 425.134 16.2865   2
  -2  -2   2 356.793 14.3065   3
  -2   2  -2 406.316 11.0014   3
  -2  -2   2 364.591 15.3210   2
  -2   2   2 378.404 12.2706   2
   2  -2  -2 339.867 17.7196   1
  -2   2  -2 450.470 12.2226   4
  -2  -2  -2 366.031 16.0963   4
   2  -2  -2 407.695 12.9619   2
   2   2   2 390.902 13.1710   1
  -2  -2  -2 367.877 12.1790   1
   2  -2   2 368.610 11.0755   1
  -2   2  -2 402.461 11.8849   1
   2   2   2 314.190 14.6637   3
   2  -2  -2 407.144 13.7865   4
  -2   2  -2 434.117 13.2290   2
   2   2  -2 401.422 14.9574   3
   2   2   3 1.77352 2.26096   1
   2   2  -3 1.03690 1.72686   3
   2  -2  -3 9.60233 3.71173   1
   2   2  -3 3.38005 1.66706   3
   2  -2   3 1.44441 1.20282   2
  -2  -2   3-4.03090 2.57012   2
  -2  -2  -3-0.31586 1.30438   1
   2   2   3 0.90002 2.16329   2
   2  -2  -3-0.78560 1.40824   4
  -2  -2  -3-0.97066 2.34972   3
  -2   2  -3 0.05402 1.76674   2
  -2  -2   3 0.88249 1.33458   1
   2  -2  -3 7.87870 3.32935   3
   2   2  -3 4.81122 2.58994   2
  -2   2  -3 2.08212 0.93424   1
  -2   2  -3-0.78109 0.78991   1
   2   2  -3-1.88127 2.07812   1
   2  -2   3 0.89855 0.92069   4
   2   2   3 1.45337 3.21194   3
  -2   2  -3-0.07027 1.22324   3
   2   2  -3 0.24291 1.44372   4
  -2   2   3 5.22367 3.35621   1
  -2   2  -3-2.28698 1.53434   4
   2   2   3 5.80214 2.79659   4
  -2   2   3 1.54931 1.56794   4
  -2   2   3-0.59302 1.88314   3
  -2   2  -3 3.25460 1.93618   3
  -2  -2  -3 1.48633 2.33000   4
  -2  -2   3-0.41502 1.30244   4
   2  -2  -3-3.17167 2.28243   2
  -2   2   3 4.34376 1.96276   2
  -2  -2  -3 1.53646 1.99922   2
   2   2  -4 3806.60 59.0998   2
   2  -2   4 3280.73 53.6608   2
  -2   2  -4 3760.07 56.9447   2
  -2   2   4 3778.47 55.8695   4
  -2   2  -4 3750.83 47.4331   3
   2  -2  -4 3770.27 64.4077   3
   2  -2   4 3749.03 51.5608   4
  -2  -2   4 3795.44 58.2495   2
   2  -2   4 3950.53 47.1301   3
  -2  -2  -4 3772.90 61.9641   3
  -2  -2  -4 3834.66 52.4573   1
   2   2   4 3782.90 57.3543   1
   2   2   4 3771.51 58.7679   2
  -2   2   4 3843.95 62.9846   3
  -2  -2   4 4035.65 56.7212   1
   2  -2  -4 3774.61 56.6198   4
   2  -2   4 3781.97 41.4444   1
  -2  -2   4 3889.70 57.1771   4
  -2  -2  -4 3752.32 59.4104   2
   2   2   4 3198.96 60.4686   3
   2   2  -4 3943.27 56.5510   3
  -2  -2   4 3832.73 55.6691   3
  -2  -2  -4 3601.04 61.8888   4
  -2   2  -4 3875.60 52.5170   4
   2   2   4 3826.85 65.7547   4
  -2   2   4 3793.91 67.4537   1
   2   2  -4 3826.16 56.8099   4
   2   2  -4 3512.09 51.8189   1
   2  -2  -4 3714.28 55.6175   2
   2   2  -5-0.39321 2.52359   1
   2  -2   5 5.97582 2.91173   3
   2  -2  -5-3.00843 2.68870   4
  -2  -2  -5-2.02277 3.32427   3
   2  -2  -5 1.06229 3.74095   1
   2   2   5 1.96906 3.19319   3
  -2   2  -5 1.12686 3.40297   2
   2  -2  -5 1.61781 1.64813   2
  -2  -2   5 1.29040 1.56496   1
  -2   2  -5-1.72739 2.12377   4
  -2   2   5-1.65728 2.77109   1
  -2   2  -5-0.54225 1.62945   3
  -2   2  -5 0.27808 1.80754   2
   2   2  -5 3.35809 2.26808   2
   2   2   5 5.24547 2.49145   2
   2  -2   5 0.83278 2.68729   4
  -2  -2   5 3.98159 3.16898   4
  -2   2  -5 2.38647 1.95589   1
  -2   2   5-2.42702 2.24205   4
  -2  -2  -5-1.23892 2.74479   1
   2   2  -5 7.77741 3.70862   4
   2   2  -5-5.08527 3.65756   3
   2  -2  -5-4.67108 2.45201   2
   2   2   5 4.23605 3.79352   1
  -2  -2  -5-2.60837 3.04578   4
   2  -2   5 3.53626 1.62637   1
   2   2   5 4.11247 3.67458   4
  -2  -2   5 0.41109 1.33452   3
  -2  -2  -5 3.72311 2.48847   2
  -2  -2   5 7.69614 4.79274   2
   2  -2  -5 5.71842 3.85021   3
  -2   2   5 3.67963 2.13943   3
   2   2   6 19.5573 5.90818   3
   2  -2  -6 15.9338 5.04900   3
  -2  -2  -6 39.2588 7.39996   2
   2  -2  -6 27.9952 6.53948   2
  -2   2  -6 8.71818 2.48169   1
  -2   2  -6 20.6075 5.12813   4
  -2  -2   6 18.6729 5.44268   2
   2   2   6 19.6935 5.55980   2
  -2   2   6 17.1013 5.01455   3
   2  -2   6 14.0640 4.82325   4
   2   2  -6 18.5438 4.90624   4
   2   2   6 20.7460 5.79381   4
  -2   2  -6 5.65632 2.03824   3
  -2   2  -6 12.9745 3.94157   2
   2  -2   6 23.0580 4.78669   3
  -2  -2  -6 20.4345 5.14566   1
  -2  -2   6 18.8856 4.59985   1
  -2   2  -6 20.6177 5.60057   2
   2   2  -6 17.2006 4.84900   3
   2   2  -6 15.3634 4.57521   2
   2  -2  -6 39.9914 8.14426   1
   2   2   6 11.7365 3.94172   1
   2   2  -6 15.7666 4.34968   1
   2  -2  -6 16.1639 3.91133   4
  -2  -2  -6 12.1553 3.68408   3
  -2  -2  -6 21.6840 5.62725   4
  -2  -2   6 12.5409 3.87910   3
  -2   2   6 17.9525 5.45590   4
   2   2  -6 18.6840 5.11769   4
   2  -2  -6 15.8319 4.93398   2
  -2   2   6 4.43759 3.57577   1
   2  -2   6 19.6153 3.95113   1
  -2   2  -7 1.05865 2.05113   2
  -2  -2   7 2.02644 3.12390   2
   2  -2  -7 0.38210 2.47848   2
  -2  -2  -7 7.41852 4.46340   1
  -2  -2  -7-5.70764 4.85714   4
   2  -2   7 0.87503 1.57952   3
   2   2  -7 0.86280 2.67600   1
   2  -2   7-1.75625 2.11937   4
  -2  -2   7 2.41953 2.27931   1
   2  -2  -7 1.72944 3.06324   4
  -2  -2   7 0.57065 2.05651   3
  -2   2  -7 4.43523 4.11705   4
  -2  -2  -7 1.52588 2.42082   3
   2   2  -7 6.71600 3.32841   4
   2   2   7 15.2101 6.43494   4
  -2   2   7 4.80905 4.25635   3
  -2   2  -7 6.97221 4.97938   2
  -2  -2  -7 2.67961 3.66464   2
   2  -2   7 1.37584 2.18711   1
   2   2  -7 2.28830 4.01196   3
   2   2   7-4.99983 4.68794   1
  -2   2   7 2.20010 2.37612   4
   2  -2  -7 3.71640 2.96119   1
   2   2   7 0.79872 2.25864   2
   2  -2  -7 2.54272 3.59323   2
  -2   2   7 20.0263 7.07072   1
  -2   2  -7 1.92586 3.22777   3
   2   2   7 6.88044 4.10727   3
   2  -2  -7-4.18316 5.12125   3
   2   2  -7-4.13683 2.71167   4
   2   2  -7-1.42424 2.53837   2
  -2   2  -7 1.53433 1.43116   1
  -2  -2  -8 488.324 28.3856   2
   2   2   8 519.037 31.5091   3
   2  -2  -8 549.430 30.2389   2
  -2   2  -8 493.064 23.1081   1
  -2   2  -8 477.114 28.6582   2
   2   2   8 544.509 28.7858   1
   2  -2  -8 552.731 32.5523   1
  -2   2  -8 446.266 24.6486   3
   2   2  -8 482.924 27.9794   4
  -2   2  -8 546.293 30.4926   2
   2  -2   8 510.749 23.0547   1
  -2  -2  -8 464.487 25.7690   1
  -2  -2  -8 382.551 25.9960   3
   2  -2  -8 497.346 28.4935   2
  -2  -2   8 535.350 29.9114   2
   2  -2  -8 394.346 25.7026   4
  -2   2   8 504.848 28.7034   4
   2  -2   8 512.749 26.2412   3
   2   2  -8 453.334 26.3442   3
  -2  -2   8 393.700 24.2030   3
   2   2  -8 449.476 25.2032   1
   2  -2  -8 534.032 31.8685   3
  -2  -2  -8 446.838 28.3349   4
  -2   2   8 469.780 29.4737   3
   2   2  -8 524.574 27.9967   4
   2   2   8 509.671 30.1743   2
   2   2   8 463.469 29.8628   4
  -2   2  -8 490.682 27.6287   4
   2  -2   8 507.086 27.4946   4
  -2  -2   8 570.247 28.7117   1
   2   2  -8 518.510 29.9668   2
  -2   2   8 463.670 30.3042   1
   2  -2  -9 2.15859 4.40655   2
  -2  -2  -9 24.0692 7.65223   1
   2  -2  -9-15.4355 6.31560   4
  -2  -2  -9 5.70256 4.81074   4
  -2  -2   9 5.95812 5.88201   3
   2   2  -9 5.80158 5.95204   4
   2   2   9 2.50835 3.22505   1
   2   2   9 8.92040 7.03001   4
   2   2   9 0.17124 3.53163   2
   2   2   9 4.80394 5.50484   3
   2  -2  -9-5.27021 4.52285   1
  -2  -2   9 0.84809 2.80835   1
   2  -2  -9-1.45342 2.86270   3
  -2  -2  -9-1.55541 4.34455   3
  -2   2   9 5.21135 3.65820   3
   2  -2  -9 3.99496 4.78161   2
  -2   2   9 1.67110 3.10492   1
   2  -2   9-0.51391 3.23572   1
  -2   2  -9-0.54288 2.88219   3
   2   2  -9 1.90297 4.42438   4
  -2   2  -9 1.56531 4.58162   2
  -2   2   9 7.34558 5.89609   4
  -2  -2   9 4.57830 4.08147   2
   2   2  -9-4.21787 3.08705   3
  -2   2  -9 1.88607 3.50339   2
   2   2  -9 2.68461 5.35798   2
   2  -2   9-0.26672 3.66366   3
  -2   2  -9 3.84539 4.69808   1
  -2   2  -9-0.30332 2.88882   4
  -2  -2  -9-0.98423 3.57386   2
   2  -2   9-1.16415 3.16999   4
   2   2  -9 3.93735 4.38573   1
  -2   2  10 759.711 42.3049   1
  -2  -2  10 756.778 37.4353   1
  -2  -2 -10 857.792 43.3393   3
  -2   2 -10 862.730 43.7395   2
  -2   2 -10 941.925 36.7546   1
  -2   2 -10 934.251 40.6504   3
  -2  -2 -10 862.652 42.9965   2
  -2  -2  10 904.447 43.9373   2
   2   2 -10 961.949 41.5176   1
  -2   2 -10 806.809 42.6557   2
   2   2 -10 864.759 43.4654   2
   2  -2 -10 827.639 41.6613   2
   2   2 -10 898.040 43.1102   4
   2   2  10 960.038 47.0779   4
  -2   2 -10 897.412 42.5493   4
   2  -2  10 965.002 36.1661   1
   2   2 -10 1008.53 44.1091   3
   2   2  10 930.356 46.9182   3
   2  -2  10 839.839 39.7404   4
   2  -2 -10 796.653 42.8472   3
   2   2  10 859.362 40.0897   1
   2  -2 -10 966.189 44.4325   4
   2  -2  10 805.805 37.3921   3
   2  -2 -10 908.376 45.2112   1
  -2  -2  10 928.085 41.8600   3
   2  -2 -10 915.560 44.4765   2
  -2  -2 -10 970.865 46.7959   4
  -2   2  10 727.500 38.5046   4
   2   2 -10 869.672 41.2055   4
  -2  -2 -10 858.094 39.2882   1
  -2   2  10 954.998 46.8000   3
   2   2  10 876.111 44.2725   2
  -2   2 -11-0.85862 3.10440   1
  -2  -2 -11 4.11611 5.47614   4
  -2  -2 -11 1.20972 4.07298   1
   2  -2  11 7.00880 4.67576   3
  -2   2 -11-1.04052 3.63882   3
   2  -2  11 2.68465 2.72240   1
  -2  -2  11 10.8347 6.03296   1
  -2  -2  11 9.30257 7.04670   3
  -2   2 -11 2.58333 4.83650   2
   2   2 -11 3.97354 5.14333   4
  -2   2  11 19.8105 10.2253   3
   2  -2 -11 1.29910 4.94692   1
  -2   2  11 2.95499 4.96253   4
   2  -2  11 14.3843 7.71443   4
   2  -2 -11 4.67781 6.78148   3
   2  -2 -11-0.81617 4.60417   2
  -2  -2 -11-3.42794 2.89123   2
   2   2 -11-4.04683 3.56152   1
   2   2  11 0.70835 3.11134   1
   2   2 -11 7.78258 6.89437   2
   2   2  11-0.90614 5.51048   3
  -2   2 -11 0.57872 3.58264   4
  -2   2 -11 13.5233 7.19241   2
   2   2 -11-2.04712 4.19418   4
   2  -2 -11 3.54012 3.74015   2
   2  -2 -11 13.6280 7.89011   4
  -2   2  11 13.4413 7.16141   1
   2   2  11 29.1984 13.2832   4
   2   2 -11 11.1185 6.70239   2
  -2  -2 -11 1.68696 3.82437   3
   2   2  11 1.49037 6.48318   2
   2   2 -11 0.18887 2.79654   3
  -2   2 -12 1144.15 56.1161   2
   2  -2 -12 1048.15 52.1893   4
   2   2  12 1295.69 60.0544   4
   2  -2  12 1178.92 45.5292   1
  -2   2 -12 1027.74 48.4294   3
  -2   2 -12 1173.38 53.9662   4
  -2  -2 -12 1247.12 58.0455   4
   2   2  12 1212.06 52.5845   1
  -2   2 -12 1174.03 46.4670   1
  -2   2  12 1314.16 60.4358   3
  -2  -2 -12 1197.61 55.7607   2
   2  -2  12 1032.43 47.8872   3
  -2  -2 -12 1182.01 55.7139   3
   2  -2 -12 1244.43 55.4959   2
   2  -2 -12 1180.26 58.1804   3
  -2  -2  12 1181.13 53.0957   3
  -2  -2 -12 1324.71 58.9959   2
  -2   2  12 1232.06 57.7915   1
  -2  -2 -12 1251.36 52.2772   1
  -2   2 -12 1125.09 55.2569   2
   2   2 -12 1152.07 54.4584   4
   2   2 -12 1154.39 51.9506   4
   2  -2  12 1178.94 53.1954   4
   2  -2 -12 1077.44 54.0526   1
   2   2 -12 1180.58 55.6281   2
   2   2 -12 1222.32 52.1158   1
   2   2  12 1202.93 58.5111   3
   2  -2 -12 1333.87 58.4223   2
   2   2 -12 990.999 49.4277   3
  -2   2  12 1025.93 50.9674   4
  -2  -2  12 1177.99 51.1943   1
   2   2 -12 1163.50 55.9582   2
   2   2 -13 14.0009 10.0204   2
  -2  -2 -13 7.08013 6.77515   2
  -2   2 -13 1.95566 4.10327   1
  -2  -2 -13-5.06525 5.98846   2
  -2  -2  13 6.78957 5.82918   3
  -2   2 -13 6.65123 6.84112   4
   2  -2  13-1.35098 3.47245   1
   2  -2 -13 15.3850 8.91373   2
  -2  -2 -13-5.57052 5.06236   3
  -2   2  13 2.83003 6.71331   1
   2   2 -13 2.66983 7.71820   4
  -2  -2 -13-1.04063 4.45384   1
  -2  -2  13-1.89361 5.16030   1
  -2   2  13 5.99588 6.80119   4
   2   2  13 0.20926 5.38271   1
  -2   2 -13-1.31960 4.83449   2
   2  -2 -13-0.97630 5.51950   4
   2  -2 -13 6.87722 6.60104   2
   2   2 -13 4.24092 4.93606   1
   2  -2 -13 11.9189 9.65901   1
   2   2 -13 0.91179 4.23110   3
   2  -2 -13 16.5368 9.18811   3
  -2   2 -13 4.84542 8.24364   2
   2  -2  13-0.42366 5.66917   3
   2   2 -13 1.14082 6.69164   4
  -2  -2 -13 1.29063 5.04974   4
   2   2  13 12.0970 9.68425   4
  -2   2 -13 3.01223 4.07267   3
   2   2  13 0.81503 5.30221   3
  -2   2  13 8.09999 10.5489   3
   2   2 -13-6.53967 7.94166   2
   2  -2  14 109.795 18.4232   3
   2  -2 -14 69.6446 14.8972   4
   2   2  14 56.9363 14.9241   4
  -2   2 -14 86.9397 18.1744   4
  -2   2  14 90.3130 17.9472   3
  -2  -2 -14 70.3069 16.0511   4
  -2   2  14 75.6680 15.3007   4
   2   2 -14 68.5199 17.6615   2
   2  -2  14 81.3776 13.6200   1
  -2   2 -14 95.3873 17.9320   2
  -2  -2  14 63.4256 13.8114   3
  -2  -2 -14 97.8821 16.5757   1
   2   2 -14 75.6994 15.8848   4
  -2  -2 -14 56.9269 14.2268   2
  -2   2 -14 55.9057 14.9338   2
   2   2 -14 94.7732 16.7800   4
   2   2 -14 76.2207 15.8642   2
   2   2 -14 72.2574 15.2843   3
  -2   2  14 48.4754 13.2859   1
   2  -2 -14 53.9471 13.9438   2
  -2   2 -14 58.4968 14.7864   3
  -2   2 -14 49.9034 15.1454   4
  -2  -2 -14 60.7189 13.6156   2
   2  -2 -14 51.7640 13.6044   3
   2   2  14 55.3575 15.1002   3
  -2   2 -14 71.5971 14.3168   1
   2   2  14 61.8878 13.8027   1
   2   2 -14 63.3523 13.8995   1
  -2  -2 -14 108.759 19.5799   3
   2  -2 -14 87.4881 18.4060   1
   2  -2 -14 69.5695 15.6861   2
  -2  -2  14 78.2032 15.0144   1
   2  -2  15 24.4281 11.7112   3
  -2   2 -15 6.27358 6.84507   2
   2  -2 -15 4.70751 8.28656   1
   2  -2 -15-0.27685 7.59116   2
  -2  -2 -15 7.88515 8.00111   2
   2   2 -15 19.6850 10.4219   4
   2   2  15-0.24464 6.54247   1
  -2   2 -15-2.79254 5.17461   2
   2  -2 -15-0.87375 5.72125   4
  -2   2 -15 2.10073 6.48382   3
  -2   2  15 7.10736 7.50293   1
  -2  -2  15 0.25256 5.52991   1
  -2  -2  15 0.27049 5.14447   3
   2  -2 -15 3.76047 8.43196   2
   2  -2 -15 6.86396 8.46908   3
  -2   2 -15-2.80229 4.80284   1
  -2   2 -15 3.13353 7.11336   4
   2   2 -15 0.90464 6.12093   2
   2   2 -15 17.4799 9.18338   1
  -2   2 -15 4.69497 8.37009   4
   2   2  15-5.63308 6.64546   4
  -2   2  15 2.26709 6.66770   4
   2  -2  15-2.64158 5.85061   1
  -2  -2 -15 2.72550 7.97847   4
   2   2  15 17.3941 12.7574   3
  -2  -2 -15 7.17126 8.16503   3
  -2  -2 -15 7.79964 9.60791   2
   2   2 -15 3.54060 7.76017   3
   2   2 -15 8.97478 9.77556   4
   2   2 -15 15.5803 11.1756   2
  -2  -2 -15-0.98706 5.77035   1
  -2   2  15 9.85658 8.74795   3
  -2  -2 -16 107.341 21.6578   4
  -2   2 -16 123.193 22.2818   2
   2  -2 -16 181.810 26.6153   1
  -2   2 -16 149.664 22.9136   3
   2  -2  16 136.889 19.0383   1
  -2  -2 -16 167.066 23.0750   1
  -2   2  16 94.2453 20.8555   3
   2   2 -16 161.725 25.9699   2
   2  -2 -16 116.052 22.3891   3
   2  -2  16 96.1123 18.3825   3
  -2  -2  16 75.3387 17.1366   1
  -2   2 -16 147.546 23.6654   4
  -2  -2 -16 128.022 22.1674   2
   2  -2 -16 107.677 20.8092   2
  -2   2  16 114.243 21.8086   1
  -2   2 -16 104.571 19.9427   2
   2   2 -16 112.348 21.8556   2
   2   2 -16 111.591 21.9820   4
  -2  -2  16 102.581 19.4734   3
   2   2 -16 99.4279 20.6005   3
  -2   2  16 99.5689 19.7117   4
   2   2  16 132.944 24.0417   4
   2   2 -16 100.228 19.6221   1
   2   2 -16 110.926 20.8529   4
  -2  -2 -16 93.6029 19.2643   3
  -2   2 -16 132.711 23.1489   4
  -2  -2 -16 70.7379 17.5978   2
  -2   2 -16 86.7172 16.3647   1
   2   2  16 164.297 26.5249   3
   2   2  16 105.911 18.8182   1
   2  -2 -16 114.743 21.3635   4
   2  -2 -16 108.991 19.8520   2
   2   2 -17 14.2127 12.1172   2
   2  -2  17 9.77994 9.70960   3
  -2   2 -17 2.33902 6.21195   1
   2   2 -17 19.6620 13.9994   3
   2  -2 -17-0.35779 7.57898   4
  -2  -2 -17-0.34478 9.09774   2
   2  -2  17 5.79042 7.49138   1
  -2  -2 -17 0.34972 10.9102   4
  -2   2  17 0.71822 9.13580   3
   2   2 -17 12.1278 13.0003   2
  -2   2 -17 4.72497 7.95389   4
  -2   2 -17 8.27469 8.94446   2
  -2   2  17 8.85967 10.4542   1
  -2  -2 -17 8.46220 9.33156   2
   2  -2 -17 5.41451 10.2819   3
  -2   2 -17 2.05818 8.17589   2
  -2   2 -17 4.38894 9.64255   3
   2   2 -17 3.74234 7.80976   4
   2  -2 -17 14.7983 11.7066   4
   2   2  17-6.55604 9.45107   3
   2   2  17-3.58834 9.50052   4
  -2   2 -17-0.34335 9.31907   4
   2  -2 -17 23.1248 12.0414   2
  -2  -2 -17 7.37183 9.54520   1
  -2  -2  17 7.68553 8.71955   3
  -2  -2 -17 16.9687 12.5150   3
  -2  -2  17 4.22667 8.99141   1
   2   2  17 12.8625 8.63379   1
   2   2 -17 11.8138 11.6524   4
   2   2 -17 15.4468 11.3538   1
   2  -2 -17 4.35825 9.94911   2
   2  -2 -17 8.04305 9.60390   1
   2  -2 -18 756.745 55.8206   2
   2   2 -18 582.574 50.3023   4
   2  -2  18 621.843 49.3802   3
   2   2 -18 543.378 49.7942   2
  -2  -2 -18 717.485 49.2572   1
   2  -2 -18 649.256 52.8181   4
  -2   2  18 563.739 51.2445   3
  -2  -2  18 633.810 50.3382   3
   2  -2 -18 645.072 53.7103   3
  -2  -2 -18 717.851 54.0716   2
   2  -2  18 579.478 41.9509   1
  -2  -2 -18 540.595 48.0301   2
  -2  -2 -18 806.109 58.3197   3
  -2   2 -18 583.711 51.2744   2
  -2   2 -18 530.731 47.6367   4
   2  -2 -18 660.808 53.2602   4
   2   2 -18 655.679 49.1010   1
  -2   2 -18 649.998 51.2622   3
  -2  -2 -18 608.128 52.3733   4
  -2   2  18 571.139 49.8020   1
  -2   2 -18 561.115 49.8432   4
  -2  -2  18 513.943 45.1465   1
   2  -2 -18 627.591 50.0316   2
  -2   2 -18 596.672 43.3188   1
   2  -2 -18 662.047 52.1126   1
   2   2  18 542.358 50.0996   3
   2   2 -18 505.903 48.6132   3
  -2   2 -18 578.738 51.2273   2
   2   2 -18 492.721 45.5126   4
   2   2 -18 578.347 51.7759   2
   2   2  18 456.381 47.1339   4
   2   2  18 650.387 48.0548   1
   2  -2 -19 7.71988 14.4391   4
   2  -2  19-1.72189 7.78021   1
   2  -2 -19 25.9639 16.1491   4
   2  -2  19 18.7079 13.2892   3
  -2   2  19-0.39088 10.6234   1
   2   2  19 10.4790 12.7258   3
   2   2 -19-1.22461 9.05439   2
   2   2 -19 12.2786 13.9373   4
   2   2  19 6.59242 13.5434   4
   2  -2 -19 24.8574 17.0221   1
   2   2 -19 20.7104 14.6920   3
   2   2 -19 38.5424 18.8940   4
  -2  -2 -19 6.78553 10.2874   2
  -2   2 -19 18.2289 15.3308   3
  -2  -2 -19 11.9561 14.4516   4
  -2  -2  19 6.41419 11.0444   3
   2   2  19 6.62800 10.3377   1
   2   2 -19 6.66717 10.9796   1
  -2  -2  19 8.08812 10.9188   1
   2  -2 -19 6.10739 11.7741   2
  -2   2 -19 12.1462 17.0113   2
  -2   2 -19 5.47828 11.9108   1
   2  -2 -19 3.65390 10.9173   2
  -2  -2 -19 16.2928 16.9621   2
  -2   2  19 7.98538 13.0748   3
  -2   2 -19 16.1575 13.7946   2
  -2  -2 -19 19.3780 11.9117   1
   2  -2 -19 10.4067 12.0716   3
   2   2 -19 25.3398 18.4996   2
  -2   2 -19 11.3076 12.1774   4
  -2   2 -19 8.35912 11.4649   4
  -2  -2 -19 1.98571 10.3722   3
   2   2 -20 210.155 31.0099   1
   2   2 -20 208.939 32.9472   4
  -2   2 -20 142.025 31.2715   4
  -2  -2 -20 215.157 33.3830   3
   2  -2  20 208.612 32.5649   3
   2  -2 -20 197.591 33.1699   2
   2  -2 -20 168.215 30.1254   1
  -2   2 -20 154.581 29.7638   2
  -2  -2 -20 212.428 32.5787   2
   2  -2 -20 234.525 35.4025   4
   2   2  20 192.702 29.0774   1
  -2   2 -20 247.499 36.0539   4
   2  -2  20 141.893 26.0461   1
  -2   2 -20 166.290 27.2929   1
   2   2 -20 221.712 34.3495   4
  -2   2 -20 263.059 36.3026   2
  -2  -2  20 190.864 31.2245   3
  -2  -2 -20 185.154 31.6645   2
  -2   2  20 219.624 34.7927   1
   2  -2 -20 251.549 34.3223   2
  -2  -2 -20 185.051 27.4513   1
   2   2  20 164.688 30.6085   3
  -2  -2  20 175.492 28.3993   1
   2   2 -20 197.941 32.7491   2
  -2  -2 -20 231.571 35.6341   4
   2  -2 -20 268.533 38.6528   3
   2   2 -20 191.951 34.3069   2
   2   2  20 232.172 36.3150   4
  -2   2 -20 163.019 29.8059   3
   2  -2 -20 225.285 33.7445   4
  -2   2  20 219.738 35.8311   3
   2   2 -20 149.601 31.0466   3
   2  -2 -21 3.42337 16.5309   1
   2   2 -21 0.91966 12.6814   4
   2   2 -21 5.35893 17.0059   2
  -2  -2 -21 0.42798 13.3357   2
  -2  -2 -21 10.5141 14.8098   1
   2  -2 -21 18.0220 18.5908   4
  -2  -2 -21 8.49782 16.9748   2
  -2   2 -21 15.1509 17.6038   4
   2   2  21 10.5951 15.3171   3
   2  -2  21 2.52883 12.0775   3
   2  -2 -21 5.69246 17.5780   3
  -2   2  21 4.43053 14.9069   1
  -2   2  21 30.1681 22.2838   3
  -2   2 -21-0.47349 14.9651   2
   2   2 -21 4.94529 16.5238   4
   2  -2 -21 3.01222 14.0159   2
   2   2 -21 9.02620 16.0835   3
  -2   2 -21-0.46595 13.3125   4
   2  -2  21 1.35707 11.1598   1
  -2  -2  21 3.08190 13.7580   3
   2   2 -21 0.92898 13.0882   2
  -2  -2  21 0.40147 11.5010   1
  -2   2 -21 27.8441 22.0190   2
   2  -2 -21-0.45456 14.2794   4
   2   2 -21 12.1842 14.4937   1
  -2  -2 -21 8.11211 15.2079   3
   2   2  21 2.26582 13.1099   1
  -2   2 -21 20.6831 16.3144   3
  -2  -2 -21 12.6212 17.2338   4
   2  -2 -21 3.73205 13.9470   2
  -2  -2  22 34.2105 21.3858   3
  -2   2 -22 32.7371 20.0473   4
  -2   2 -22 61.9464 25.1200   4
   2   2  22 47.3574 21.5609   1
   2  -2 -22 83.2111 24.0133   2
   2   2 -22 53.8087 21.1193   1
   2  -2 -22 57.9412 25.1401   1
   2   2 -22 61.4629 24.4454   4
  -2  -2 -22 31.1179 21.9991   4
  -2   2 -22 24.4664 18.0744   2
  -2   2 -22 51.4704 21.8496   3
   2  -2  22 31.7203 19.7599   3
   2  -2  22 76.5109 20.5980   1
  -2   2 -22 17.5887 14.7640   1
   2  -2 -22 74.6015 25.2011   4
  -2  -2 -22 50.9616 24.4332   2
  -2  -2 -22 64.5535 25.6236   2
  -2   2  22 55.0284 23.8195   3
  -2  -2 -22 23.4246 20.3264   4
  -2  -2 -22 47.4481 23.9152   3
   2   2  22 53.9906 23.6460   3
   2   2 -22 101.655 30.8922   3
   2  -2 -22 71.5695 27.6086   2
  -2  -2  22 33.6883 19.8106   1
   2   2 -22 56.9290 25.0693   2
   2   2 -22 63.2113 26.6128   4
  -2   2 -22 53.6270 23.7681   2
   2   2 -22 139.400 32.0461   2
   2  -2 -22 81.3431 26.9017   3
  -2   2  22 79.0644 26.9043   1
  -3   0   0 1.14468 1.41677   2
   0   3   0-0.60566 1.66676   1
   0  -3   0 0.50466 1.51903   4
   0  -3   0 3.23878 1.57827   2
   0   3   0 3.98846 1.80262   3
   0   3   0-0.97996 1.46390   4
  -3   0   0 3.99911 1.50011   1
   0  -3   0 4.92478 1.73524   1
  -3   0   0 4.14300 1.27734   4
   3   0   0 3.05671 1.33403   4
   3   0   0 5.10297 2.04007   2
   0   3   0 2.99526 1.53584   2
   0  -3   0-1.28136 1.83758   3
   3   0   0-0.23374 0.74451   1
   3   0  -1 1.32784 0.60692   3
   0   3  -1 7.62294 2.19410   2
   0   3  -1 8.12783 2.33076   4
  -3   0  -1 7.10784 2.43688   2
   0  -3   1 2.09744 1.54152   3
  -3   0   1 5.90261 1.90736   1
   0  -3   1 6.26678 1.45382   2
   3   0  -1 5.36724 1.98887   2
  -3   0   1-0.91988 1.33694   4
   0  -3   1 3.58134 2.19384   4
   0   3   1 2.43487 0.84384   2
   0  -3   1 1.24938 1.76232   1
   3   0   1 5.67017 2.26088   2
   0  -3  -1 10.3219 2.97650   3
   0   3   1 6.13973 2.66371   1
   0   3   1 18.3922 3.41293   4
   3   0  -1 3.17950 1.12067   4
  -3   0   1 4.93817 1.50782   2
   0  -3  -1 8.09173 2.44477   1
   0   3  -1 4.02498 1.58855   3
   3   0   1 6.48304 2.21716   4
  -3   0  -1 7.73113 2.19511   4
   0   3   1 17.5218 3.41069   3
   0  -3  -1 5.18200 1.54921   2
   3   0  -1 19.3077 3.72954   1
   0  -3  -1 14.0389 2.75729   4
  -3   0   1 8.30499 2.00418   3
   0   3   2 7.94359 3.18199   1
   0  -3  -2 3.00522 2.03172   1
   0   3  -2-0.73616 1.08948   1
  -3   0   2 1.05744 1.42304   3
   0  -3  -2 10.5811 3.12889   3
  -3   0  -2 3.58645 1.58421   3
   0   3   2 5.54249 2.63731   4
   0   3  -2 4.37673 2.27373   2
  -3   0   2 3.06061 1.17745   4
   0  -3  -2 0.98449 1.33074   2
   0  -3   2 5.09795 2.63699   3
   3   0  -2 3.89184 2.03994   2
   0   3  -2 3.99546 2.15647   4
   3   0   2 0.26101 1.33904   2
   3   0  -2 3.83080 1.98429   1
   0  -3   2 6.18525 2.45897   2
  -3   0  -2 1.87504 2.10413   2
  -3   0   2 3.18240 2.26855   2
   3   0  -2 2.21864 1.01498   3
   3   0   2 7.32677 2.74701   4
   3   0  -2 7.82306 2.40086   4
   0  -3   2 0.57305 1.86596   1
   0   3   2 1.02162 1.09783   2
  -3   0   2 2.30035 1.69954   1
   0   3   2 7.29750 2.63639   3
   0  -3  -2 1.13868 1.96209   4
   0  -3   2 3.52348 1.35742   4
   0   3  -2 4.48791 1.86713   3
  -3   0  -2 2.74550 1.82816   4
   0   3  -3-0.65481 1.24311   1
  -3   0   3 8.36822 2.41200   4
  -3   0   3 63.6306 7.23505   1
   3   0   3 5.33728 2.70538   2
   0   3  -3 59.5837 6.38241   2
   0   3  -3 0.80858 1.91769   3
  -3   0   3 2.58209 1.70795   3
   3   0  -3 1.86970 1.69713   2
   0  -3   3 3.05931 1.87430   3
  -3   0   3-0.05938 1.28732   2
   0   3   3 1.15334 1.43870   2
   0   3   3 0.74030 2.40965   4
   0  -3  -3 9.30440 3.27997   2
   0  -3  -3-1.02540 1.87510   1
  -3   0  -3 13.7912 3.31859   3
   0  -3  -3 6.41201 3.13753   4
   0   3   3 10.0225 3.45957   1
   0  -3  -3 3.33246 3.14797   3
   0  -3   3 2.50833 1.68172   2
   3   0   3 3.08192 1.38175   3
  -3   0  -3 3.95162 2.55430   2
   0   3  -3 6.70487 2.74361   1
   3   0  -3 4.66485 2.85665   1
   3   0  -3 2.84365 2.35728   3
   0  -3   3 2.26941 1.80534   4
   0   3   3 74.2785 8.59792   3
   3   0  -3 6.17793 2.96470   4
   3   0   3 7.46196 2.67524   4
  -3   0  -3-0.55265 1.85615   4
   0   3  -3 0.99110 1.52023   4
   0  -3  -4 4.73957 2.85900   4
   0  -3  -4 0.74174 1.86236   3
   0   3  -4 2.16733 2.05658   2
   3   0   4 0.48343 1.55100   2
  -3   0  -4 1.59790 2.70447   2
   0   3  -4-1.74088 1.52151   3
   0  -3   4-0.76101 2.04870   2
   0  -3   4 0.23866 2.09408   1
   3   0   4 1.04434 0.82038   1
   3   0  -4 3.23899 2.55525   4
   0  -3  -4 8.59167 4.26003   1
   0   3   4 4.66282 2.93066   3
   0  -3   4 1.43565 2.30540   4
   0   3   4 2.48765 1.81538   2
   3   0  -4 6.46908 3.58073   1
   3   0   4 12.7617 4.31452   4
  -3   0  -4 0.06427 1.53631   1
   3   0  -4 5.24914 3.27112   3
   3   0  -4 2.90666 2.24588   2
   0   3   4 2.11196 1.96061   4
  -3   0  -4 0.88506 2.40355   4
   0   3  -4 4.36842 2.07714   3
  -3   0   4-1.64808 1.29894   3
  -3   0   4 5.21913 2.50808   2
   0   3  -4-0.94975 2.23956   4
   3   0  -4 4.92751 2.18750   4
  -3   0   4 4.14301 2.99011   1
   3   0   4-3.17406 2.41591   3
   0   3  -4-0.36355 2.18687   1
  -3   0  -4 0.94772 1.45756   3
   0   3   4 3.03097 4.29295   1
   0  -3  -4 1.07085 1.44199   2
  -3   0  -5 2.03905 1.77523   2
   0  -3   5 2.54454 2.10726   1
   0  -3  -5 23.1396 6.18302   2
   3   0   5 3.92287 3.31882   4
   3   0  -5 6.01590 2.49898   4
  -3   0   5 2.02861 2.70591   2
   0   3   5 3.33288 3.36336   4
   3   0  -5 2.80181 2.25558   2
   3   0  -5 1.64484 1.99513   4
  -3   0   5 2.96018 2.54468   3
   0   3  -5 6.49929 3.17733   4
  -3   0  -5 5.80343 1.90581   4
   3   0  -5 3.42639 3.03044   3
   0  -3  -5 4.20472 2.29094   1
  -3   0   5-4.78499 3.87534   1
   3   0   5 2.50787 2.92080   3
  -3   0  -5 2.23062 2.16561   1
   0  -3  -5 2.39917 2.39609   4
   3   0   5 2.40212 2.13356   1
   0  -3  -5 10.6590 5.20197   3
   3   0   5 6.88319 3.04687   2
   0   3  -5-0.62408 1.15944   3
   0  -3   5 30.6437 5.59626   2
   0   3  -5 7.00163 2.97983   4
   0   3   5 9.43719 3.69503   2
   0   3  -5 8.02380 2.82813   3
   0   3  -5 3.79226 2.44595   2
   0   3   5 13.5747 5.57021   3
   3   0  -5 7.25840 3.59280   1
  -3   0  -5 12.4601 4.05738   3
   0   3   5 16.2607 4.70176   1
   0   3  -5-0.75909 1.81403   1
  -3   0   6 4.34349 2.98106   3
   0  -3  -6-1.11393 3.72483   3
   0  -3   6 4.36241 1.50881   1
   3   0  -6-0.41300 1.59992   4
   3   0   6 4.59870 2.95475   4
   0   3  -6 1.29450 1.56317   4
   3   0   6 5.29299 2.37954   1
   0  -3  -6-1.75847 2.99719   4
   0   3   6-3.99604 4.25649   1
  -3   0   6 1.72368 3.43252   1
   0   3  -6-0.08030 2.45029   1
   0  -3  -6-1.47030 1.62246   2
  -3   0  -6-3.81498 2.02626   2
   3   0  -6 0.59082 1.43784   4
   0  -3   6 11.4882 6.48140   2
   3   0  -6 5.34443 3.15190   2
   0  -3   6-1.68947 1.81180   3
   0   3   6-2.83468 2.95642   2
   0  -3  -6 4.92833 4.04751   1
   0   3  -6 1.36162 2.35606   4
   3   0   6-0.38204 2.26236   3
   0   3   6 0.12364 3.62667   4
  -3   0  -6 2.19046 2.06270   1
  -3   0  -6-2.57739 2.64597   3
   3   0  -6-2.34165 3.66352   1
   0   3  -6 0.72535 2.58705   3
   0   3  -6 14.1986 5.66274   2
  -3   0   6 2.10585 2.48214   2
  -3   0  -6-2.78618 2.41220   4
   0   3   6 4.14146 5.03260   3
   3   0   6-1.31180 2.23591   2
   3   0  -6 0.65905 2.37359   3
  -3   0  -7 8.94764 3.75166   4
   3   0  -7 2.41096 3.97332   3
   0  -3  -7 51.6732 10.1087   4
   0   3   7 3.08090 4.19747   4
  -3   0  -7 5.72502 4.72738   2
   3   0  -7 7.72763 4.10852   2
   3   0   7 8.40665 5.37657   4
  -3   0   7 3.81300 3.26935   2
   0   3  -7 8.68145 2.70998   4
   3   0   7 6.05200 2.85262   1
   0   3   7 13.2056 5.95430   3
   0  -3   7 9.44263 4.05431   1
   0   3  -7 3.62726 2.40665   3
   0  -3   7-2.50981 3.94850   3
   3   0   7 0.69856 2.23722   2
   0   3   7 39.6766 7.70236   2
   0  -3   7 2.09146 3.06174   2
   0   3   7 49.6243 9.53724   1
  -3   0   7 14.3568 4.90637   1
   0  -3  -7 3.41130 4.24115   3
   0   3  -7 6.62348 4.72952   2
   0  -3  -7 13.7175 5.79353   1
   0   3  -7 6.46297 3.14263   1
   3   0   7 1.24969 2.08820   3
   3   0  -7 7.53170 4.36377   4
   3   0  -7 5.95866 3.81846   4
  -3   0  -7 18.8362 3.93720   1
  -3   0  -7 0.67324 3.55854   3
  -3   0   7 6.24648 3.04224   3
   3   0  -7-6.98838 2.92715   1
   0  -3  -7 10.8922 5.81716   2
   0   3  -7 3.06174 2.92071   4
   0   3  -8 2.88023 3.57684   4
   0  -3  -8-2.92245 3.53553   3
   0   3   8 1.03129 2.74833   2
   3   0   8-0.32805 2.35639   1
  -3   0   8-0.27458 3.39179   3
  -3   0  -8-1.22155 3.10094   1
  -3   0  -8 10.4675 5.60770   4
   0  -3  -8 1.96755 3.19881   2
   0  -3   8 5.39226 3.56930   1
   3   0  -8-3.02127 2.74511   3
   0  -3  -8 9.07823 4.41420   4
   0   3   8 3.76389 4.32232   4
   3   0   8 1.85391 3.50031   3
   3   0  -8 5.82072 4.25615   4
   3   0   8-0.78895 4.92922   2
   0   3  -8-1.07447 2.43351   2
   0   3  -8 0.42308 1.82269   1
  -3   0  -8-1.17066 2.98242   3
   0   3  -8 7.66729 4.81342   2
  -3   0  -8-6.16016 4.96090   2
   0  -3  -8 10.3668 5.61898   1
   3   0  -8 3.51411 3.72656   4
   0  -3   8 2.54717 3.35015   3
   0   3   8-2.30032 3.55400   3
  -3   0   8-2.76982 2.66489   1
   3   0   8 2.09080 3.62482   4
  -3   0   8-1.12264 4.12151   2
   3   0  -8-3.10415 2.59864   1
   0   3  -8 2.10963 4.08587   3
   0   3  -8-1.09225 2.81067   4
   3   0  -8 1.48050 3.10415   2
   0   3   8-4.06178 3.90673   1
  -3   0  -9 7.18537 3.48625   1
  -3   0  -9 27.8357 8.42753   2
  -3   0  -9 19.9665 7.16821   4
   3   0   9 5.07572 5.71040   4
   0   3   9 2.43526 3.36956   4
   3   0  -9-0.82019 3.99413   1
   0  -3  -9 16.3125 7.93588   3
   0   3  -9 3.26063 2.20207   4
   3   0   9 17.3847 4.62434   1
   3   0  -9 0.48554 3.71206   3
   0   3  -9 4.74429 3.01334   1
   3   0  -9 3.84212 3.77171   4
  -3   0   9-0.15948 2.09938   2
   0  -3  -9 1.47831 3.39322   2
   0  -3  -9 8.07816 5.05745   2
  -3   0   9 8.77457 5.76593   1
  -3   0   9-1.55864 3.10592   3
   0   3  -9 12.5942 5.12027   4
   0  -3   9 3.02671 2.18036   1
   0  -3   9 3.60543 3.50760   3
   0   3  -9 11.7696 6.43188   2
   0   3   9 1.87145 4.79561   1
   0   3  -9 8.61328 6.81103   2
   3   0   9 0.35415 2.63757   2
   3   0   9 7.22846 4.56327   3
   0  -3  -9-0.17744 3.81689   4
   0   3   9 21.7615 8.10398   3
   3   0  -9 7.92838 3.80583   4
   3   0  -9 3.35749 4.25658   2
   0   3  -9 7.30325 5.20240   3
  -3   0  -9 13.0804 6.05700   3
   0  -3  -9 4.85301 5.52584   1
   3   0  10 7.27159 5.82859   3
   3   0  10 7.03182 3.57013   1
   0  -3  10 10.7013 5.38984   3
  -3   0 -10-3.42547 4.58000   4
   0  -3 -10-1.94334 4.10562   2
   3   0 -10 7.21951 6.01381   4
   0   3  10 1.54699 5.75042   4
   0  -3 -10 1.45899 5.33763   3
   0   3 -10-3.70737 5.15727   3
   3   0 -10 0.54400 3.35213   3
   0  -3 -10 7.32963 5.71468   2
   0   3  10 2.67138 3.78306   1
   0   3 -10 14.7795 7.12289   2
   0   3 -10 0.82828 2.01102   1
   0   3 -10 5.17099 5.39577   4
   3   0  10 3.39614 4.08110   4
   3   0 -10-1.99240 2.67210   1
  -3   0  10-4.90199 4.89087   3
   0   3 -10 3.32112 4.02912   4
  -3   0 -10-0.38352 2.64572   1
   0   3 -10 5.39555 5.17168   2
   0  -3 -10 3.33887 5.29129   4
   3   0  10 0.19949 2.86204   2
   3   0 -10-1.62319 3.94930   4
   3   0 -10 5.45176 6.48199   2
  -3   0 -10-1.30616 4.32682   2
   0   3  10 10.4633 7.35281   3
  -3   0  10 3.23331 5.19945   1
  -3   0 -10-2.02337 3.10604   3
   0  -3  10 1.78874 2.12951   1
   0  -3 -10-6.24371 5.97367   1
   0   3 -11 13.6610 6.25321   4
   0   3 -11 11.8451 6.53007   2
  -3   0 -11 4.39331 5.71482   2
  -3   0  11 3.90610 4.99146   3
   3   0 -11 4.59032 4.92407   3
   0   3  11 20.9907 8.59769   4
   3   0 -11-0.80619 5.34730   2
   3   0  11 4.69197 4.60786   3
   0  -3 -11 10.9756 9.75153   2
   0  -3  11 7.05664 5.50476   3
   3   0 -11 1.20862 4.45335   4
  -3   0 -11 16.1350 6.04842   2
  -3   0 -11 7.37399 5.82934   4
   0   3 -11 20.3917 7.39906   4
   3   0  11-1.05251 3.30173   4
   0  -3  11 18.6188 6.44581   1
   3   0  11 16.2085 4.62704   1
   3   0 -11 28.4337 8.97486   4
   0   3 -11 1.25294 3.61488   1
  -3   0 -11 1.72851 2.69383   1
   0   3  11 22.8051 9.09711   1
   3   0 -11 0.98839 4.08345   1
   0  -3 -11-2.73541 4.32228   2
   0  -3 -11 5.57977 6.94979   1
   3   0 -11 20.0291 6.86061   2
  -3   0  11 0.99388 4.22867   1
   0   3 -11 8.11555 6.13950   3
  -3   0 -11 23.9657 8.23451   3
   0  -3 -11-6.05459 5.48015   4
   0   3  11 8.86926 5.89302   3
   0   3 -11 21.7257 8.58979   2
   0  -3 -11 20.7892 9.76841   3
   3   0  12-3.13025 4.23918   3
   3   0 -12-7.33010 4.87081   1
   3   0 -12 5.01005 4.94993   4
   3   0  12 2.16686 3.58163   1
  -3   0 -12 0.69649 4.80469   4
   3   0 -12 2.86872 4.38316   3
   0   3 -12-14.2664 8.48243   2
   0   3  12 4.97050 6.20405   3
   0  -3 -12 0.85367 3.78245   2
   0   3 -12 7.03257 5.72561   1
  -3   0 -12 8.23424 5.36797   1
   0  -3  12-0.68366 3.31726   1
   0   3  12-2.10456 3.93355   4
  -3   0 -12-5.45744 7.51151   2
   0  -3 -12-6.29168 5.15330   1
   3   0 -12 14.8332 7.07579   2
   0   3 -12 0.93366 5.65460   2
   0   3 -12-2.60026 3.22660   3
  -3   0 -12 9.22479 5.94814   3
   0   3 -12 1.64363 4.19207   4
   3   0 -12 8.91587 5.68172   4
   3   0 -12-1.60874 3.63477   2
   0  -3 -12 13.4871 8.80306   3
   0   3 -12 3.24712 3.58081   4
   3   0  12 5.82092 5.44330   4
   0  -3  12 5.09788 5.05666   3
   0  -3 -12 1.79462 4.02770   2
  -3   0  12 14.2952 9.49884   3
   0  -3 -12 0.23691 4.66978   4
  -3   0 -12 12.0490 8.06608   2
   0   3  12 4.79286 6.08157   1
  -3   0  12 3.46632 4.49517   1
  -3   0  13 3.35137 6.46461   3
   3   0 -13 8.55331 7.53064   2
  -3   0  13-5.42020 6.08859   1
   0   3 -13 10.1009 6.30194   3
   3   0 -13-0.23122 4.27170   4
   0  -3 -13 4.90584 4.34081   4
   0  -3  13 7.12161 6.71164   3
  -3   0 -13 16.1615 9.15174   2
  -3   0 -13 11.3250 7.06743   3
   3   0  13 9.97836 7.31386   4
   0  -3 -13 15.4027 9.47845   1
  -3   0 -13 0.25410 5.02459   4
   3   0 -13 6.81953 8.32434   3
   0   3  13 3.60908 6.62719   1
   0   3 -13 6.03429 6.34459   1
   0   3 -13 12.0736 8.27986   2
   0  -3  13 4.34195 5.49810   1
   0   3 -13 11.1679 8.28550   4
   0   3  13 10.2623 8.17086   4
   0  -3 -13 41.9715 12.4230   2
  -3   0 -13 1.84435 7.36857   2
   3   0  13 11.9216 6.79105   3
   3   0  13 0.16185 3.27548   1
   3   0 -13 10.2351 8.03923   2
   0  -3 -13-4.64802 6.44997   2
   0   3 -13 10.9879 8.60372   4
   3   0 -13-3.06317 5.06936   1
  -3   0 -13 20.1371 7.81671   1
   0   3 -13 9.42894 9.60145   2
   0   3  13 6.00095 6.14815   3
   3   0 -13 7.85880 5.38845   4
   0  -3 -13 16.0148 7.91695   3
   0  -3  14 20.9932 9.47690   1
   0  -3  14 1.89697 4.53783   3
  -3   0  14-0.25763 4.77574   1
   0   3  14 4.32363 7.21834   3
   0   3 -14 0.85580 4.78968   1
   0   3  14 4.48218 6.63580   4
   3   0 -14 7.20925 5.85016   2
   3   0  14-1.93872 5.51522   4
   3   0 -14 7.27499 8.58859   4
   0   3 -14-3.09871 5.25031   2
   0   3 -14 0.50096 4.41733   4
   0   3  14 0.55329 6.81170   1
   0   3 -14 3.41331 6.73728   4
   3   0 -14-2.18857 5.74203   2
  -3   0 -14-2.15214 6.57949   2
   0  -3 -14-2.64417 6.50872   3
  -3   0 -14 1.18698 4.56786   1
   0   3 -14 24.8546 13.4005   2
   3   0  14 16.2953 8.76140   3
  -3   0 -14-1.38751 6.62901   4
  -3   0 -14 9.11177 7.85248   3
   0  -3 -14-4.74360 6.69616   1
   3   0 -14 20.2758 10.9393   3
   0  -3 -14 6.72989 8.43200   4
   3   0  14-0.17976 3.55765   1
   3   0 -14 16.9017 10.4690   1
   3   0 -14-0.76978 4.46731   4
   0   3 -14-0.48116 5.30420   3
   0  -3 -14 0.26482 6.41634   2
  -3   0 -14 2.87663 7.39185   2
  -3   0  14-1.31285 5.92765   3
   0  -3 -14 8.83679 7.85362   2
   3   0 -15 6.95221 6.53244   1
   3   0 -15 16.3114 9.92807   2
   0  -3  15 5.46104 7.19058   3
  -3   0  15-6.99423 6.92661   1
   3   0  15 7.32007 6.04188   1
   0  -3 -15 7.61770 9.02367   3
   0  -3 -15 15.7540 10.0473   4
   0  -3 -15-2.18754 7.08597   2
   3   0 -15 22.2690 9.28523   4
   0   3 -15 20.9672 10.3716   1
   3   0  15 6.87668 7.52939   3
   0   3 -15 2.44363 9.50135   2
  -3   0 -15 18.7740 9.09996   3
   0   3 -15 11.3630 8.76168   3
   0   3  15-4.52223 5.82639   4
   0   3 -15 5.55808 7.73577   4
  -3   0 -15 51.7565 15.4257   4
   3   0 -15-4.05785 6.21358   2
  -3   0 -15 9.33644 6.69821   1
   0   3  15 3.65691 8.43046   3
  -3   0  15 3.73296 6.89950   3
   0  -3 -15 11.5157 8.99829   2
   3   0 -15 8.82282 8.03196   4
   0   3 -15-4.27630 7.20430   2
  -3   0 -15 9.02778 10.6233   2
   0  -3 -15 19.2138 10.8787   1
   3   0  15 5.45386 9.14111   4
   3   0 -15 23.2453 10.5764   3
  -3   0 -15 17.3898 13.4579   2
   0   3  15 1.47349 6.16324   1
   0   3 -15 4.02451 7.58804   4
   0  -3  15 3.58468 6.14840   1
   3   0 -16 4.71337 9.17501   3
   0  -3  16 3.40386 7.18771   3
  -3   0  16 4.54445 7.45886   1
   0  -3  16 6.35156 6.95413   1
   0   3 -16 28.0157 11.8545   1
   0  -3 -16 24.1457 11.4405   4
   3   0  16 3.69097 5.90912   1
   0   3 -16 4.84570 9.28529   4
   3   0 -16-3.20979 7.35595   4
   0   3  16-2.11965 8.29350   3
  -3   0  16 25.5310 11.4147   3
   0   3 -16-1.87100 6.69599   4
  -3   0 -16 5.93762 8.13767   2
   0  -3 -16 25.1780 13.3953   2
   3   0 -16 2.18045 8.13911   2
  -3   0 -16 0.47402 6.48287   1
   0  -3 -16 7.82901 12.0910   2
   0   3 -16 0.66039 7.29224   2
   0   3 -16 27.3409 12.6907   2
   0   3  16 20.9869 12.2179   4
   0  -3 -16 21.5119 15.0830   3
  -3   0 -16-8.67817 9.16384   2
   3   0 -16 13.9734 11.8689   4
   0   3 -16 2.59454 7.61876   3
   3   0 -16 12.9037 9.90062   1
   0  -3 -16 6.01535 8.01547   1
  -3   0 -16 12.3376 10.0924   3
  -3   0 -16-1.62455 5.51852   4
   0   3  16-5.31784 7.16577   1
   3   0  16 2.70912 6.40541   3
   3   0  16 2.62281 7.59987   4
   3   0 -16 11.4984 9.14081   2
   0   3 -17 4.38133 10.2697   4
   0   3 -17 14.3756 10.2504   1
   3   0  17 0.98721 7.58079   3
   3   0 -17 31.3451 14.8484   4
   0   3 -17 10.8680 9.84557   4
  -3   0 -17 16.6750 10.1742   3
   0  -3 -17 28.7680 13.2277   4
   3   0 -17 38.5652 15.1994   3
  -3   0 -17 20.0151 10.9872   1
   3   0 -17 7.71236 9.76867   2
  -3   0 -17-1.39813 7.44409   4
   0   3  17 9.48215 9.93186   3
   0  -3 -17 10.8247 9.56990   2
   0   3 -17 3.16246 7.08829   3
  -3   0  17 14.5288 12.5675   3
  -3   0 -17 10.8350 10.4157   2
   0  -3 -17 2.00700 6.35040   2
   0   3  17 32.0340 14.7430   1
   3   0  17 10.2991 8.45716   1
   0   3 -17 8.10122 9.26583   2
  -3   0  17 16.7000 11.2928   1
   0  -3  17 16.7144 8.52405   1
   3   0 -17 13.9521 10.0351   4
   0  -3 -17 8.94088 11.9926   1
  -3   0 -17 9.03393 8.71937   2
   3   0  17 1.41288 8.64298   4
   0   3 -17 13.5171 10.7870   2
   3   0 -17 42.9039 16.3987   1
   0   3  17 5.23153 7.04236   4
   0  -3  17 2.77632 7.74016   3
   3   0 -17 7.60687 10.4076   2
   0  -3 -17 1.09564 8.80781   3
   3   0 -18 9.37401 11.3496   1
   0   3 -18 20.4565 13.0650   3
   0  -3 -18 33.7534 15.6542   2
   0  -3  18 1.00788 8.49561   3
   0   3  18 32.1296 17.1396   1
  -3   0 -18 15.1166 11.6596   2
   0   3  18 9.69890 12.9640   3
   0   3 -18 6.46370 11.7488   4
   0  -3 -18 2.84813 8.64257   2
  -3   0  18 5.14574 12.1981   3
   3   0  18 7.26772 12.0188   4
   3   0 -18 17.2705 12.4509   2
  -3   0 -18 3.33462 8.60713   1
   3   0 -18 5.28585 10.3249   4
   0   3 -18 1.46248 8.94276   4
   3   0 -18 38.6783 19.4244   4
  -3   0 -18 12.0781 12.2948   2
  -3   0 -18 23.9924 15.7482   3
   0  -3 -18 23.0788 16.5227   3
  -3   0 -18 21.3942 15.6387   4
   0  -3 -18 2.02795 8.87769   1
   3   0 -18 15.6191 12.8766   2
   0   3  18-3.35179 8.33116   4
   0  -3 -18 7.50171 10.8006   4
  -3   0  18 7.74449 11.5307   1
   3   0  18 20.7234 11.4855   3
   3   0  18-3.71473 6.55969   1
   0   3 -18 7.28309 11.6625   2
   0  -3  18 4.34169 7.99587   1
   0   3 -18 2.69795 8.18468   1
   0   3 -18 10.5352 11.1837   2
   3   0 -18 6.68848 10.3133   3
   3   0  19 32.1380 14.5220   1
   0  -3 -19 26.2139 14.7975   3
   0   3 -19 9.48930 12.0978   1
  -3   0 -19 16.5081 14.0247   2
   0   3  19 3.97595 10.9050   4
   0   3 -19 1.18730 10.8371   4
   0   3  19 4.92560 11.3161   1
   3   0 -19 12.1363 14.3616   4
  -3   0  19 8.32307 11.2144   3
   3   0 -19 16.3674 12.7511   1
  -3   0 -19 4.56546 12.2600   3
   0   3 -19 4.00982 12.4949   2
   3   0 -19-1.58850 10.1090   2
   0   3 -19 32.8422 17.6062   2
   0  -3  19 0.94205 8.70066   1
   3   0 -19 19.8504 14.1669   2
   0  -3  19 62.2446 20.4669   3
   0  -3 -19 14.4018 13.2297   4
   3   0 -19 47.4370 17.5739   3
  -3   0 -19 13.2677 16.3382   4
   0   3  19 6.00897 10.8158   3
  -3   0 -19 40.9203 17.9630   2
   3   0  19 3.84621 11.7817   3
   0   3 -19 19.0070 13.9064   4
   0  -3 -19 14.3878 13.7009   2
   0  -3 -19 27.7557 14.0019   1
   0  -3 -19 14.0745 13.1672   2
   3   0 -19 34.5003 16.3673   4
   0   3 -19 16.7876 13.3876   3
  -3   0  19 9.05857 11.8696   1
  -3   0 -19 4.47609 9.24068   1
   3   0 -20 21.1905 14.7982   2
   0  -3  20 3.75865 9.90372   1
   0  -3  20 5.92669 13.7528   3
   0   3  20 7.68585 13.8983   1
   0   3 -20 14.1546 16.5367   3
   3   0  20 27.7836 17.5228   3
  -3   0 -20 12.4192 14.8515   4
   3   0 -20 15.5567 16.2873   3
   0  -3 -20 2.31009 10.5332   2
   0   3 -20 5.68428 11.4021   1
   0   3 -20 3.83475 13.0169   2
   3   0 -20 4.38577 12.8451   1
  -3   0 -20 9.39609 12.7046   3
   0   3  20 25.7422 15.3873   3
   0  -3 -20 0.42496 13.6418   4
  -3   0 -20 3.06064 13.8074   2
  -3   0  20 6.81797 14.3098   3
   3   0 -20 13.4110 13.1491   4
   0   3  20 5.99609 14.3800   4
   3   0 -20 0.43111 11.2983   4
   0   3 -20 0.41931 9.70519   4
   0   3 -20-0.42431 12.1582   4
  -3   0 -20-0.45106 12.4165   4
  -3   0 -20 11.6210 13.2604   2
   0  -3 -20 5.70308 13.6048   2
   3   0  20-0.93384 9.15946   1
   0  -3 -20 10.6630 13.6029   3
   0  -3 -20 5.22139 11.7064   1
   0   3 -20 6.65670 14.5244   2
  -3   0  20 4.86349 11.9425   1
  -3   0 -20 13.4307 14.9784   1
   3   0 -20 8.45099 15.3417   2
   0   3  21-0.98080 12.8536   3
   3   0 -21 12.0131 18.1588   4
   0   3 -21 22.7808 17.2636   1
   3   0 -21 22.5001 19.2422   2
  -3   0 -21 23.4866 18.5980   3
  -3   0 -21 18.1310 17.9140   2
   0  -3 -21 8.92841 13.8565   3
  -3   0 -21 3.81145 13.1226   4
   0  -3 -21-0.47543 15.0041   4
   0  -3 -21 2.25883 13.7146   4
   3   0 -21 17.3023 20.2719   2
   0   3  21 4.71500 14.7349   1
   0  -3 -21 14.7861 18.2026   2
   3   0  21-0.44497 12.3103   3
  -3   0 -21 22.9653 18.0964   2
  -3   0  21-0.45887 11.7493   3
  -3   0 -21 5.89727 13.6550   4
  -3   0  21 9.24430 15.8316   1
  -3   0 -21 17.1540 16.6907   1
   0   3 -21 25.1333 18.7781   4
   3   0  21 7.28818 11.7693   1
   0  -3 -21-0.87208 13.6209   2
   3   0 -21 19.8565 16.5365   3
   0   3 -21-0.44906 12.8141   2
   3   0 -21 9.38070 16.2331   1
   0  -3  21 0.37119 12.0988   1
   3   0 -21 4.52459 16.3903   4
   0   3 -21-0.43982 12.5616   3
   0   3 -21 7.09233 13.5710   2
   0  -3 -22 1.38623 14.1161   2
   3   0 -22-1.48418 14.5718   3
   3   0 -22 1.35921 19.9941   1
   0   3 -22 4.52096 16.0288   3
   0   3  22 6.25965 17.8483   3
  -3   0 -22 3.47487 18.5263   2
   3   0  22 4.27092 20.9296   3
   0   3 -22 55.6711 23.4167   1
   3   0  22 10.3187 15.4460   1
   0  -3 -22 1.22036 15.6521   1
   0   3  22 19.4744 18.8224   1
   0   3 -22 2.00680 18.7014   2
  -3   0 -22 3.03074 15.9576   4
   0   3 -22 4.90957 17.7181   4
   0  -3 -22 41.3740 28.6479   4
   3   0 -22 4.38266 19.3006   4
   0   3 -22 19.9202 20.8677   3
   3   0 -22 37.5643 24.5263   2
  -3   0  22 4.40534 17.9276   3
   0  -3 -22 7.40419 17.8900   3
  -3   0 -22 14.4502 16.6891   4
   0  -3 -22 29.1564 21.6862   4
   0   3 -22-0.48811 14.2712   4
  -3   0 -22 16.9073 19.6032   2
   0  -3 -22 17.5691 19.6618   2
   3   0 -22 8.58975 16.0029   2
   3   0 -22 19.1030 20.3548   4
  -3   0 -22-0.46281 14.3824   3
  -3   0  22 4.24798 17.7006   1
  -3   0 -22 23.5330 16.9458   1
   0  -3  22 4.37260 14.6505   1
  -3  -1   0 4048.06 49.8364   2
   1  -3   0 3670.63 46.0978   1
  -1   3   0 3666.19 37.4098   4
   3  -1   0 3944.60 39.7774   2
  -1  -3   0 3792.64 47.8699   3
  -1   3   0 3732.44 43.5177   3
  -3  -1   0 3972.78 34.7407   1
   3   1   0 4085.71 50.8478   2
   1   3   0 4116.71 49.1747   4
   1   3   0 4339.86 50.7654   3
  -1   3   0 3742.27 46.0395   1
   3   1   0 4165.85 35.6473   1
   3   1   0 3960.61 37.8161   3
  -3  -1   0 4378.39 45.8877   4
   1  -3   0 3716.27 43.8118   3
   3  -1   0 3997.27 45.2036   1
  -1  -3   0 3970.97 48.8133   4
  -1  -3   0 3925.45 46.5060   1
   1   3   0 4241.18 45.4245   2
   1   3   0 4228.44 47.8408   1
   3   1   0 3885.33 45.2078   4
  -3   1   0 4100.96 39.5871   2
   1  -3  -1 31.3776 3.91383   4
   1  -3   1 39.4856 3.80924   4
  -1   3   1 32.9862 4.12700   4
  -1   3   1 40.2059 3.02361   2
   1   3   1 37.5047 4.82092   1
   3  -1   1 31.4667 3.71977   2
  -1  -3  -1 34.8957 5.10946   4
  -1  -3  -1 35.5450 4.52933   1
   3   1   1 38.4335 2.99345   1
  -3  -1  -1 41.3649 4.93094   4
  -3  -1  -1 35.9915 5.06450   2
  -1  -3   1 32.9235 4.39949   3
  -3   1  -1 42.8414 4.53092   2
   1   3   1 34.9473 4.38745   2
  -3   1  -1 45.3575 3.26142   4
   1   3  -1 37.8595 4.61077   2
   1  -3  -1 44.4190 3.24815   2
   1   3   1 34.6763 5.09139   3
   1   3  -1 32.6197 4.51444   4
   1  -3   1 32.4075 4.42782   1
  -3  -1   1 30.9687 3.86139   4
  -1   3  -1 35.6580 4.44366   1
  -1  -3   1 44.8116 5.46471   4
   1   3  -1 28.2574 4.30158   3
   3   1  -1 26.1388 3.75252   1
  -1   3   1 28.8024 4.29736   3
  -1   3  -1 38.0867 3.17508   2
  -3   1   1 31.6806 4.60518   1
   3  -1  -1 39.9712 5.13425   1
  -1  -3  -1 50.4181 6.05431   3
   3  -1  -1 33.7281 3.86855   2
   1  -3   1 39.9372 3.27735   2
   3   1   1 33.8122 4.46032   2
   3  -1   1 39.9427 3.19355   1
   1   3  -1 31.4095 4.36064   1
   3   1  -1 31.7935 4.78393   2
  -3   1   1 33.6308 3.41685   3
  -1   3  -1 38.1538 4.11341   3
  -1  -3   1 30.3404 4.80027   1
   1   3   1 47.7720 5.93341   4
   1  -3  -1 25.4276 4.21770   1
   3  -1  -1 33.0419 3.56498   3
  -3  -1   1 37.0734 4.98417   2
  -1   3   1 37.0941 5.02993   1
   3   1  -1 37.6302 4.49398   4
  -3  -1   1 41.7151 4.26829   1
  -3  -1   1 26.4849 3.51800   3
  -1  -3   1 48.0737 5.09920   2
   3   1   1 43.1632 4.13431   3
  -1   3  -1 34.6491 3.56034   4
   3   1   1 33.1097 4.62214   4
   1  -3   1 29.6743 3.82453   3
   3   1  -1 36.8139 3.81782   3
  -3  -1  -1 35.3663 3.59141   3
  -1  -3  -1 37.7241 4.89439   2
  -3   1   1 40.2091 3.23446   4
   1  -3  -1 31.3357 4.64183   3
  -3   1  -1 44.0859 3.84886   1
  -3   1   1 39.1649 4.14662   2
  -3  -1  -2 559.074 16.1494   3
   1   3  -2 589.814 19.2403   4
  -3  -1  -2 645.736 20.2665   4
  -1  -3  -2 609.840 21.9413   3
   1   3  -2 568.789 18.0787   2
   3   1  -2 597.912 18.6191   4
   3  -1  -2 590.112 15.5158   4
  -3  -1  -2 593.287 20.5181   2
   1  -3   2 639.313 16.8955   4
   3  -1   2 619.556 18.5129   2
  -1   3  -2 660.551 18.9468   1
   3  -1  -2 578.801 22.1399   1
  -1  -3  -2 645.801 19.9195   2
   1  -3  -2 606.419 19.5342   4
  -1  -3  -2 612.261 19.7700   1
   1   3   2 637.904 21.7005   4
   1   3  -2 451.064 16.6461   1
   3  -1  -2 601.061 15.7160   4
  -1   3   2 482.798 19.8307   3
   1   3   2 559.145 19.2127   1
  -1   3   2 609.271 19.3119   4
   1  -3   2 575.609 16.6182   3
  -1   3   2 620.951 22.9175   1
   1   3  -2 578.680 18.9131   1
  -1   3  -2 609.866 15.5742   2
   3   1   2 623.102 20.4997   4
  -3   1  -2 640.850 16.4703   4
  -3   1   2 622.218 17.4441   2
   1  -3  -2 674.714 24.0087   1
   1  -3  -2 598.181 15.6694   2
   1  -3  -2 640.859 23.0863   3
  -1  -3   2 583.787 19.0406   3
   3  -1  -2 601.583 18.7067   3
   3   1  -2 609.983 18.7689   1
   3   1  -2 656.342 18.4632   3
  -1   3   2 531.831 15.0872   2
   1   3   2 559.261 18.1983   2
   3   1  -2 595.007 17.5532   3
   1  -3   2 551.826 17.1064   1
   3  -1   2 554.114 16.2270   4
  -3   1   2 525.583 20.1250   1
  -3   1  -2 581.257 17.2932   2
  -1  -3   2 472.541 17.5887   4
  -1   3  -2 583.624 16.6777   3
   1   3   2 677.582 23.0499   3
   3   1   2 603.475 17.8051   3
  -3  -1   2 658.016 21.1920   2
   3   1   2 593.083 20.6417   2
  -3  -1  -2 581.183 10.5513   1
   3   1  -2 594.053 20.1144   2
   1   3  -2 579.716 18.8845   3
   3  -1  -2 577.656 17.4771   2
  -1  -3   2 459.306 17.0843   2
  -3  -1   2 465.077 16.3779   4
  -1   3  -2 607.234 16.3658   4
  -1  -3  -2 598.254 21.5993   4
  -3  -1   2 566.520 18.4578   1
   1  -3   2 596.610 16.6338   2
  -3   1   2 544.826 17.3862   3
  -3   1   3 6.19184 2.45399   1
  -3   1  -3 9.71037 2.21798   3
   3  -1  -3 6.88152 2.08829   4
  -3  -1   3 4.72874 2.65200   1
   1   3   3 15.9445 4.66552   1
  -1   3  -3 8.55624 2.50256   3
  -1   3   3 10.1031 3.38279   3
   3   1   3 12.4355 3.47836   2
   3   1  -3 13.3958 3.17588   4
  -1   3  -3 10.5066 2.78954   1
   3  -1   3 8.25980 1.61201   3
  -3   1  -3 10.6622 2.12742   4
  -3  -1  -3 12.0251 3.75583   4
   1   3  -3 7.80541 2.33680   4
  -3  -1   3 8.76021 2.40258   3
  -3   1   3 10.7162 2.48449   2
  -1   3   3 12.2076 4.08275   1
   3  -1  -3 19.6255 3.93252   4
  -1  -3  -3 2.92093 1.85388   2
  -1  -3   3 24.9764 4.54228   2
   3  -1  -3 8.23532 1.98715   3
  -1   3  -3 11.0163 2.75046   2
   1   3   3 14.8704 4.27418   4
  -3   1   3 16.6652 3.72794   3
   1  -3   3 12.6031 3.09585   3
  -1  -3  -3 9.64258 3.00432   1
  -3   1  -3 8.31928 1.30431   1
   1   3  -3 17.0760 3.77853   3
   1  -3  -3 13.4500 4.78225   3
  -1   3  -3 14.5405 3.33420   4
  -1  -3  -3 15.2183 4.32575   3
  -1   3  -3 8.99259 2.03043   1
  -3  -1   3 17.5462 4.04430   2
   3  -1   3 12.6768 2.82950   4
  -1   3   3 8.03506 2.22206   2
  -3   1  -3 12.5044 1.63686   1
   3   1  -3 18.9628 3.98386   1
   3   1   3 17.5435 3.91435   3
  -1  -3   3 10.2615 3.18249   4
   1   3   3 18.1781 3.75430   2
  -3  -1  -3 10.2612 3.62747   3
  -3   1  -3 21.6037 4.19231   2
   1  -3  -3 14.7504 4.64665   4
  -3  -1  -3 10.9368 1.78838   1
   3  -1   3 14.5414 3.44278   2
  -1  -3   3 11.8684 3.34763   3
   1  -3  -3 13.2062 2.79888   2
   1   3  -3 11.3736 3.01189   2
   3  -1  -3 18.7502 5.44491   1
  -1  -3  -3 22.2728 5.77688   4
   1  -3   3 20.6040 3.44219   4
   3   1   3 12.7488 3.53044   4
  -1  -3   3 15.6655 3.36350   1
   3  -1  -3 14.2828 3.42005   2
   1  -3  -3 20.8160 4.80307   1
   3   1  -3 13.3838 3.94102   2
  -3  -1  -3 11.8031 3.03732   2
   1  -3   3 12.6462 3.76042   2
  -3  -1   3 14.8763 3.61627   4
   3   1  -3 11.3041 3.20188   3
   1   3  -3 10.5667 3.18878   1
  -1   3   3 11.2832 3.60963   4
   1   3   3 8.03507 2.68113   3
  -3  -1   4 8866.97 89.4301   1
   3   1   4 9620.72 95.9905   2
  -1  -3   4 9703.21 85.8096   1
   1   3  -4 9462.32 84.9862   1
   1   3  -4 9022.98 86.9385   3
   3  -1   4 9017.23 85.9882   4
  -1   3   4 9039.84 89.5740   2
  -1  -3  -4 9141.87 102.227   4
   3   1  -4 8868.90 91.8218   2
  -3   1   4 9399.29 92.1955   3
  -1   3  -4 9312.19 80.7120   3
   3  -1  -4 8332.70 80.4158   4
   3  -1   4 9917.68 97.2465   2
  -3   1   4 8320.40 82.5369   2
  -3  -1  -4 9093.95 95.4833   4
   1   3   4 9174.38 101.302   4
  -1   3  -4 9405.69 79.1514   1
  -1  -3  -4 9127.13 105.882   3
  -1   3  -4 9206.42 82.4290   4
  -1  -3  -4 8441.42 91.4208   1
   3  -1  -4 8908.36 101.186   1
   3   1   4 9014.64 101.060   4
   1   3  -4 9277.31 89.9560   2
  -3   1   4 8964.42 100.061   1
   1   3  -4 9243.02 89.3523   4
   1   3  -4 9885.68 89.2517   3
   1  -3   4 8533.10 87.6696   2
  -3  -1  -4 9066.14 63.9516   1
   3  -1  -4 8626.57 92.1328   3
   1  -3  -4 8309.67 103.823   3
  -3  -1   4 9324.01 88.5193   4
  -3   1  -4 9599.32 89.7636   2
   3   1  -4 9224.00 87.0296   3
  -1   3  -4 9791.52 85.5308   4
   3  -1  -4 8764.42 85.2904   4
   1   3   4 8985.57 106.330   3
   3   1  -4 8944.74 90.8430   1
  -3  -1   4 9796.96 90.1114   3
  -3  -1   4 9973.53 94.8505   2
  -3  -1  -4 8970.99 87.9736   3
   1  -3  -4 9118.16 108.342   1
  -1  -3  -4 9211.29 91.5742   2
   3  -1  -4 9494.61 90.1955   2
   3  -1   4 9357.25 50.8637   1
   3   1   4 8860.48 93.1168   3
   1  -3  -4 8954.62 96.8844   4
  -1   3  -4 9669.96 81.3270   3
   1  -3  -4 8712.08 84.9357   2
  -1   3   4 8809.75 107.318   1
   3   1  -4 9146.10 87.3345   4
  -3   1  -4 9353.84 74.2180   3
  -1  -3   4 9096.70 88.1650   4
  -1   3   4 9035.08 106.666   3
   1   3   4 9397.51 102.029   1
  -1  -3   5 15.5754 5.31959   2
   3  -1  -5 9.02955 2.91763   4
  -3   1  -5 26.1427 4.99046   3
  -3   1   5 17.8229 4.58661   4
  -1  -3  -5 17.2711 5.35718   1
   3   1   5 5.47653 2.16984   1
  -1   3   5 30.1882 7.16328   1
   3  -1   5 16.8197 2.55710   1
  -3  -1  -5 18.6690 4.88315   3
  -3  -1   5 14.6966 4.29916   1
   3  -1   5 18.9599 5.62303   2
   3  -1  -5 23.0889 5.70773   3
  -3   1  -5 14.0462 2.83815   1
  -1   3  -5 18.1691 4.15476   1
  -3   1   5 28.6007 5.93411   3
  -1   3   5 13.5595 4.25573   2
  -3  -1  -5 13.4056 3.52995   1
  -3   1   5 22.2116 5.62809   1
   1  -3  -5 8.81872 4.15435   4
   3  -1   5 20.2400 4.76097   4
   1  -3  -5 30.0641 7.35958   1
   3   1  -5 27.6024 6.10632   2
  -1   3  -5 20.1264 5.16615   2
   3   1  -5 13.3779 4.22999   3
   1   3   5 24.1257 5.81943   1
   3   1   5 17.5246 5.01815   3
   3  -1  -5 15.3272 5.28289   1
  -3  -1   5 27.0339 5.44919   2
   1  -3  -5 14.5120 3.88147   2
   1   3   5 19.9930 4.73820   2
   1  -3  -5 6.40246 3.25101   3
  -3   1  -5 27.4334 6.83131   4
  -3  -1   5 13.2462 4.17456   3
   3   1  -5 20.0929 4.73201   1
  -3   1  -5 13.0489 3.72249   2
   3  -1  -5 16.7600 4.77318   2
  -1   3  -5 22.5196 5.04427   4
  -3   1   5 16.5330 4.41757   2
  -1   3  -5 21.7796 5.15434   2
   1   3   5 8.27233 4.19020   3
  -1  -3   5 17.5861 4.16985   4
   3   1  -5 23.4020 5.27063   4
   1   3  -5 20.3143 4.60064   3
   1   3  -5 20.5346 5.27196   2
  -1  -3  -5 9.94832 2.93716   2
   1   3  -5 21.6367 4.75420   3
   3   1  -5 18.6709 4.11547   4
  -1  -3  -5 17.5616 4.89615   4
  -1  -3  -5 22.8593 4.62117   3
   1  -3   5 18.5063 3.90765   1
  -3  -1  -5 12.1895 4.41714   2
   3   1   5 27.6751 6.03841   2
  -1  -3   5 21.0700 4.62264   1
  -1   3  -5 18.8565 4.28766   3
   1   3   5 21.1756 5.81799   4
   1   3  -5 10.9746 3.53938   4
  -1   3   5 18.7577 5.61413   3
   3  -1   5 16.3333 3.72581   3
   3   1   5 37.5582 8.05566   4
  -3  -1  -5 31.9368 5.99191   4
  -1   3  -5 14.3766 3.59426   4
   1   3  -5 19.1969 4.19745   1
  -1   3  -5 19.4328 4.42171   3
  -1   3   5 14.0903 4.20221   4
   3  -1   6 82.3959 10.9234   2
  -1  -3   6 110.680 12.2056   2
   3  -1   6 120.874 10.6448   3
  -3  -1   6 89.2607 10.6192   1
  -3  -1  -6 87.7367 8.63208   1
  -3   1   6 52.3942 8.23255   4
  -3  -1  -6 95.5506 11.4202   4
  -3  -1  -6 81.2839 10.5117   3
   3   1  -6 75.7549 9.86936   4
  -1   3  -6 106.974 11.8018   2
  -3   1  -6 109.241 11.5103   4
   3   1   6 89.4613 10.8210   3
  -3   1   6 71.5277 10.4567   1
  -1   3   6 89.0800 12.5492   3
   3   1  -6 73.4111 9.33109   3
   3   1   6 81.8118 8.40218   1
  -1   3   6 88.5317 12.0365   1
  -3  -1   6 80.1702 10.1603   3
   1   3   6 106.224 13.3415   1
   1   3   6 80.7295 10.2770   2
   3   1  -6 85.9790 10.2971   4
  -1   3  -6 66.1957 7.56106   1
  -3  -1  -6 85.4562 10.5958   2
  -1   3  -6 79.8359 9.50058   4
  -1   3  -6 93.6870 11.2402   2
  -1   3  -6 98.2725 10.5596   4
  -1   3   6 112.607 12.7356   4
  -1  -3  -6 100.756 11.4090   2
   1  -3  -6 79.8700 11.1456   4
   3   1   6 99.0575 11.8887   2
   3  -1   6 66.7684 8.95548   4
   1  -3  -6 76.9764 11.7368   1
   1   3   6 72.9777 11.3711   3
   1   3  -6 84.7356 10.6899   2
  -3   1  -6 91.9610 9.98712   3
  -3   1  -6 74.5883 9.75774   2
  -1  -3  -6 75.6176 10.9477   3
   1   3  -6 87.3740 10.1640   4
   1  -3   6 105.052 9.34534   1
   3   1  -6 76.8928 10.3825   2
   1   3  -6 94.3721 10.0022   1
  -3   1   6 92.1603 11.2245   2
   1   3   6 102.965 12.9199   4
   3  -1  -6 90.8639 10.3932   2
   3  -1  -6 69.5315 9.87281   3
   3  -1   6 87.5647 7.27868   1
   1  -3  -6 113.379 13.8751   3
  -3  -1   6 97.6873 11.2267   2
   1   3  -6 74.7949 9.34796   3
  -3   1  -6 96.5589 8.01859   1
   1  -3  -6 85.5193 10.5076   2
  -3   1   6 89.4567 10.9793   3
   1  -3  -6 86.3174 10.4504   2
  -1  -3  -6 98.2927 11.9836   4
   1   3  -6 91.9238 10.3487   4
   1  -3   6 89.3630 9.17454   3
   3   1  -6 86.8469 10.5273   1
  -1  -3   6 76.5371 8.89532   1
  -1   3  -6 106.733 10.8504   3
  -1  -3  -6 87.4052 11.0543   1
   3  -1  -6 105.492 10.7786   4
   3   1   6 74.2136 10.3779   4
   3  -1  -6 63.3137 9.35738   1
  -1   3   7 26.8182 7.19244   3
   3  -1  -7 29.4083 7.18424   3
   1   3  -7 39.8664 8.10241   4
   1   3   7 21.6615 6.72560   1
  -3   1  -7 35.8979 5.86824   1
   3   1   7 30.0338 7.63828   4
  -1  -3  -7 28.7629 6.32702   2
  -1   3  -7 26.5349 5.29213   1
  -1  -3  -7 20.9059 6.16448   3
   1   3   7 35.5877 7.36650   2
   3   1   7 20.3206 6.12165   2
  -1   3  -7 32.0717 6.66657   4
  -3   1   7 24.5715 6.85479   3
  -3   1   7 35.8243 8.12951   1
  -1  -3  -7 26.6150 6.72915   1
   1   3  -7 35.4611 6.64400   1
   1  -3  -7 29.4064 6.77859   2
  -1  -3  -7 32.4385 7.60740   4
   3   1   7 31.1063 8.09769   3
  -3  -1  -7 24.5497 6.54713   2
   1  -3   7 19.5425 3.78785   1
  -3  -1  -7 21.2005 6.91368   4
   3  -1   7 34.4423 7.20359   4
   3   1  -7 36.6098 7.91746   2
   1   3  -7 36.1745 7.07389   2
   3  -1  -7 23.7731 6.73656   2
   3  -1   7 21.6846 6.39781   2
   3   1  -7 26.9147 6.33437   4
   3  -1  -7 23.8912 5.87232   4
   1   3   7 17.4822 5.96915   3
  -1   3  -7 35.2688 6.70242   2
  -3  -1  -7 29.9794 7.76075   3
   1  -3  -7 16.7814 5.73468   3
   1   3  -7 47.0519 8.79157   4
  -1   3  -7 21.3438 5.88295   3
   3   1  -7 26.1697 6.84477   1
   3  -1   7 23.3000 4.63033   1
  -1   3   7 31.8418 8.27114   1
  -3  -1  -7 60.4284 8.76334   1
  -1  -3   7 34.2226 7.48735   2
  -1   3   7 29.1800 6.62425   4
  -1   3  -7 31.5695 6.66442   4
   1  -3  -7 31.3091 7.53758   4
   3   1  -7 19.3645 5.86571   4
   1  -3  -7 21.2163 5.51585   1
  -1   3  -7 26.9141 6.78771   2
   1   3  -7 32.6082 6.75050   3
  -3   1   7 29.9309 7.04638   2
  -3  -1   7 26.9164 6.38441   3
  -3   1  -7 30.1928 6.08152   3
   1   3   7 25.2447 6.44020   4
   3  -1  -7 24.5709 7.60735   1
   3   1   7 39.3566 6.89611   1
   3   1  -7 31.6192 6.19620   3
   1  -3   7 34.1084 6.20338   3
  -3  -1   7 41.7720 8.37142   2
   3  -1   7 40.1266 7.01345   3
  -1  -3   7 18.5385 5.00431   3
  -3   1  -7 26.2232 6.56037   4
   1  -3  -7 27.1061 7.15778   2
  -3   1   7 34.2787 6.80962   4
  -1  -3   7 29.6518 6.05327   1
  -3  -1   7 16.5625 5.45099   1
  -3   1  -7 27.3149 6.21255   2
  -1   3  -8 3536.42 79.1934   2
   1   3  -8 3411.32 72.6729   4
   1   3   8 3308.48 78.5615   1
   1  -3  -8 3204.29 80.2483   3
  -1  -3   8 3714.46 70.9314   1
  -1   3   8 3222.02 80.9046   1
  -1   3  -8 3396.54 72.7771   4
   3   1   8 3473.03 81.0594   4
   3  -1   8 3731.19 76.8934   4
   1   3   8 3401.46 76.2200   2
  -3   1   8 2753.41 67.8897   3
  -3   1  -8 3372.34 75.8035   2
   3  -1  -8 3449.40 73.4683   4
  -1   3  -8 3471.41 63.3822   1
   3  -1  -8 3599.59 79.7494   3
  -3   1  -8 3136.20 72.1383   4
   3   1  -8 3328.51 73.0539   3
  -1  -3   8 3392.31 76.2691   2
  -3   1  -8 3121.99 56.5350   1
   3   1   8 3252.14 74.7660   3
   1  -3  -8 3301.21 74.1137   2
  -3   1   8 3574.98 80.8089   1
  -3  -1   8 3009.05 68.4481   3
   1   3  -8 3308.20 66.0246   1
   1   3   8 3388.28 80.6833   4
  -3  -1   8 3291.98 72.7859   1
   3  -1  -8 3532.48 78.1381   2
   3  -1   8 3077.88 64.4716   3
  -1   3   8 3287.68 75.4864   4
  -1  -3  -8 3342.55 79.5730   4
  -3   1   8 3423.30 74.1150   2
  -1   3  -8 3187.38 67.1976   3
   3  -1  -8 3002.44 74.4359   1
  -1  -3  -8 3384.66 75.1229   1
  -1   3  -8 3268.69 75.0427   2
  -1  -3  -8 3260.31 73.8843   2
   3  -1   8 3481.85 79.3171   2
  -3   1  -8 3322.54 68.0736   3
   3   1   8 3344.15 62.3461   1
   3   1   8 3556.10 80.5433   2
  -1   3  -8 3574.14 73.4384   4
  -1  -3   8 3473.77 71.2042   3
   1   3  -8 3457.34 76.2030   2
   3   1  -8 2737.41 65.3820   4
   1  -3  -8 3305.16 72.7254   2
   3   1  -8 3346.57 74.0057   4
   3  -1   8 3411.68 54.4715   1
   1  -3  -8 3286.61 76.6742   4
  -1  -3  -8 3473.30 82.3623   3
  -3  -1  -8 3442.89 63.3424   1
  -3  -1  -8 3303.02 73.2603   3
  -3  -1  -8 3478.07 77.0276   2
  -3  -1  -8 3616.55 81.4787   4
   1  -3  -8 3386.60 81.0678   1
  -3   1   8 3495.61 72.9176   4
  -1   3   8 3357.68 82.4161   3
   1   3   8 3313.90 82.2886   3
   3   1  -8 3438.40 74.2494   1
   1   3  -8 3653.20 75.9274   4
   1  -3   8 2832.91 57.1184   1
  -3  -1   8 3747.01 78.6528   2
   1   3  -8 3541.83 71.8516   3
   3   1   9 39.7806 7.14891   1
   1   3  -9 34.1527 7.91571   4
   3  -1  -9 28.1469 7.50104   4
   1  -3  -9 34.1699 9.24872   1
  -3   1   9 37.5819 9.13362   1
   3   1  -9 19.3789 6.52310   4
   1   3  -9 34.9722 8.56942   2
   3   1  -9 40.9086 9.24594   4
  -1   3   9 46.3942 10.0468   1
  -1  -3   9 47.8609 9.12730   3
   1   3   9 46.1499 10.3781   2
   1  -3  -9 25.4919 7.54177   2
   1   3  -9 30.0360 7.05519   1
   1  -3  -9 37.4083 8.37280   2
  -3  -1   9 36.8751 8.43786   3
  -3  -1   9 37.4090 8.45611   2
   3  -1  -9 35.4283 8.49268   2
  -1  -3  -9 44.4889 10.3132   4
   3   1   9 45.5896 10.0044   2
   3  -1  -9 20.1121 6.71907   3
   1  -3  -9 61.1526 11.4903   4
  -1   3  -9 33.2352 8.13756   2
  -1   3  -9 44.0038 9.23124   4
   3  -1   9 45.4551 7.26844   1
  -1   3   9 42.0335 9.49459   4
  -3   1  -9 38.3669 8.11142   3
  -3   1   9 26.6468 6.81920   4
  -1  -3   9 34.1591 7.25863   1
   1  -3  -9 24.8515 10.2732   3
  -1  -3  -9 46.1554 9.43730   2
  -3  -1  -9 48.6547 8.46201   1
   3   1  -9 46.2326 9.85227   3
  -3   1  -9 27.5410 6.71348   2
   1   3   9 47.0438 10.9361   3
  -1   3   9 31.7825 9.01481   3
   3  -1   9 29.2446 8.06482   4
  -1  -3  -9 56.0953 11.3514   1
   1   3   9 36.0115 9.00219   4
  -1   3  -9 34.6182 8.25037   3
  -3   1  -9 37.6147 7.66948   1
  -1   3  -9 49.1619 9.39182   2
  -1   3  -9 34.2791 8.46665   4
   1   3  -9 45.9079 9.87495   4
   3  -1  -9 33.2702 8.58254   2
   3  -1  -9 33.9127 9.14994   1
  -1   3  -9 32.8014 6.45064   1
   1  -3   9 30.6921 7.41649   3
  -3  -1  -9 25.0348 7.12394   3
   3   1  -9 34.0461 8.03110   2
   3   1   9 22.2720 8.10597   4
  -3  -1   9 40.5140 10.4496   1
   1  -3   9 34.1487 6.89846   1
   1   3   9 37.7439 9.65011   1
  -3  -1  -9 47.9468 10.3707   4
   3   1  -9 38.5810 9.19258   1
  -1  -3   9 47.2075 10.5403   2
   3   1   9 27.1597 7.61376   3
  -3  -1  -9 37.4538 8.45290   2
   3  -1   9 32.7162 7.86885   3
  -3   1  -9 37.1950 8.79955   4
  -1  -3  -9 39.6208 10.3118   3
  -3   1   9 23.1330 6.72764   3
   1   3  -9 34.8648 7.69533   3
   3  -1   9 25.4296 7.15859   2
   1  -3 -10 3186.66 80.3189   2
  -3  -1  10 2532.24 74.1847   2
  -3   1  10 3152.74 83.9195   1
   1  -3 -10 3084.10 84.5736   1
   3  -1 -10 2860.02 78.8251   2
  -1   3  10 3075.31 87.2186   1
   3  -1  10 3310.21 76.1944   3
   1   3 -10 3220.38 79.0009   4
   3   1 -10 3305.26 81.5532   1
  -1   3 -10 2814.03 74.8554   4
  -3   1 -10 3026.61 65.5826   1
   1   3 -10 2811.29 73.7559   3
  -1   3 -10 3182.39 69.2278   1
   1   3  10 3007.22 87.5125   3
  -1   3 -10 3061.27 76.7024   4
  -3   1 -10 2801.76 77.4644   2
   3  -1 -10 3143.72 79.3144   4
   3   1  10 3317.85 84.4847   3
  -1  -3 -10 2960.62 84.0298   3
   1   3  10 3389.03 87.9746   4
   1   3 -10 3230.39 83.2907   2
   3  -1 -10 2565.68 72.7398   2
  -1  -3  10 2489.08 68.4397   3
   3   1  10 2777.91 63.9633   1
   1  -3  10 2927.86 72.1887   3
   3  -1  10 3383.35 83.9980   4
   3   1 -10 3115.19 80.4682   4
   1   3 -10 3271.83 80.9644   4
   1  -3 -10 3299.71 83.1111   2
  -3   1  10 3457.30 85.5777   3
   3  -1 -10 3220.52 84.9321   1
  -3  -1  10 3096.18 77.9742   1
   1  -3 -10 3125.07 83.7901   4
  -3   1 -10 3326.24 83.4497   4
  -1   3 -10 2798.25 79.6301   2
  -1   3 -10 3205.06 76.0049   3
   3   1  10 2438.90 75.8329   4
   3   1  10 2561.88 76.6192   2
  -1  -3 -10 3225.76 82.1914   2
   1  -3 -10 3214.12 88.2601   3
  -3  -1  10 2608.59 72.3031   3
  -1   3  10 2972.72 80.5683   4
  -3  -1 -10 3282.26 82.6077   3
   3  -1  10 2617.49 56.6951   1
  -1   3 -10 3118.87 82.7558   2
  -3  -1 -10 3183.22 81.9905   2
   1   3 -10 3313.18 86.0291   2
  -3  -1 -10 3109.29 69.6926   1
   1  -3  10 2732.69 63.0887   1
  -3   1 -10 3025.46 74.6212   3
  -1  -3 -10 3007.05 78.6571   1
   1   3 -10 2964.47 70.7527   1
   1   3  10 2949.01 81.6286   1
   3  -1 -10 3083.81 82.5679   3
   3   1 -10 3107.79 79.2715   3
  -1  -3  10 2635.24 67.9988   1
   1   3  10 3241.41 84.2441   2
   3   1 -10 3117.87 77.6548   4
  -1   3  10 3112.35 88.4886   3
  -3   1  10 3302.45 80.1488   4
  -3   1 -10 2562.07 77.5207   2
  -3  -1 -10 2970.57 81.6436   4
  -1  -3 -10 2781.98 79.7651   4
   3   1 -10 3112.95 83.1268   2
   1   3 -11 21.5637 7.05961   1
   3  -1 -11 20.7762 7.35081   4
   3  -1  11 31.8503 9.54270   4
  -1   3  11 24.6751 9.73845   3
   1  -3 -11 26.0274 9.31050   2
  -1  -3 -11 26.5980 8.47000   3
  -1  -3  11 35.2892 9.75063   1
   3  -1 -11 19.3032 8.72790   1
   3  -1 -11 35.2509 10.5327   3
  -3   1  11 24.0952 8.30428   1
   1  -3 -11 2.34610 5.12296   4
  -1   3 -11 16.7987 7.04742   4
   1  -3 -11 33.1132 9.28736   2
  -1   3  11 34.6602 10.3115   4
  -1   3  11 35.6325 11.0551   1
  -3  -1  11 27.7356 8.84419   3
   3   1 -11 42.8486 9.89935   3
   3   1 -11 27.7237 9.21338   1
  -1  -3  11 37.8650 10.6313   3
   3  -1 -11 26.4681 9.05664   2
   3   1 -11 25.7959 7.41720   4
  -3  -1 -11 34.0837 8.20370   1
  -3   1 -11 37.7681 10.3382   4
  -3  -1 -11 14.2657 6.80623   4
   1   3  11 41.4912 12.4473   1
   1  -3 -11 30.8188 8.86159   1
   1   3 -11 29.8740 8.78608   4
  -1   3 -11 27.4036 9.93856   2
  -3   1 -11 18.9386 5.56333   1
   3  -1  11 18.7206 7.10506   3
   1   3  11 36.4632 10.7917   4
   3   1  11 40.4014 11.4123   4
  -3   1  11 18.3012 7.31571   3
  -3  -1 -11 33.7112 10.2785   2
  -1  -3 -11 12.2459 6.98262   4
   1  -3  11 19.3826 5.79912   1
   1   3  11 34.8515 11.7732   3
   1   3 -11 29.9048 9.58157   2
   3  -1 -11 28.7343 9.03393   2
  -1   3 -11 33.3733 9.26540   3
  -3   1 -11 26.3451 8.78432   3
  -1   3 -11 21.0533 8.19240   2
   3   1 -11 38.1031 11.1447   2
  -1   3 -11 28.6809 7.20774   1
  -3  -1  11 34.2960 10.6050   1
   1   3 -11 31.0831 12.0975   2
  -3   1 -11 20.7009 8.20674   2
   1   3 -11 27.1692 8.07411   4
   1  -3  11 26.7573 8.36934   3
   3   1  11 17.2010 7.80619   2
   3   1  11 36.4361 10.6928   3
  -1  -3 -11 19.1573 6.97904   1
  -3   1 -11 31.6058 8.72321   2
   3   1  11 13.2170 5.70802   1
   3   1 -11 21.4971 8.20820   4
  -1  -3 -11 47.5947 11.5501   2
  -1   3 -11 25.7451 7.69468   4
   1   3 -11 31.1401 8.96157   3
  -3  -1 -11 42.3772 9.82568   3
  -1  -3 -11 39.1719 10.2435   2
   1  -3 -11 41.4640 11.6263   3
   3  -1  11 27.4335 6.45760   1
   1  -3 -12 3762.19 96.7227   2
   3   1 -12 4004.32 102.136   2
   3   1 -12 3552.38 97.5870   2
  -1   3 -12 4071.51 98.9522   4
   3  -1 -12 4350.26 108.243   3
  -3  -1  12 4303.94 101.409   1
   1   3 -12 3682.70 99.8247   2
   3   1  12 4113.98 103.861   3
  -1  -3 -12 3859.55 98.6381   2
  -3  -1  12 3405.66 90.9346   3
   1   3 -12 4139.28 98.6260   3
   3  -1 -12 3931.36 101.971   1
  -1   3  12 4235.24 113.018   3
   3   1 -12 3785.43 96.5021   3
  -1  -3  12 4001.37 96.0876   3
   1  -3 -12 4012.42 108.168   3
  -3  -1 -12 3940.15 99.1537   3
   1  -3  12 4002.64 85.4918   1
   3  -1 -12 3229.93 92.9141   2
   1  -3  12 3732.31 91.1666   3
   3  -1  12 4232.51 97.4047   3
  -1   3 -12 3804.82 85.7907   1
  -1  -3 -12 3615.62 94.2856   1
   3   1  12 4180.89 107.401   4
   1   3  12 3895.07 100.961   1
   3  -1  12 4140.97 80.7492   1
   3  -1  12 4565.95 107.234   4
   1  -3 -12 4231.15 106.408   4
  -3   1 -12 4212.56 104.669   2
  -1  -3  12 3794.06 90.2703   1
   3  -1 -12 3652.17 95.5044   4
  -1   3 -12 4284.44 102.472   4
  -1   3 -12 3931.40 94.1413   3
  -3  -1 -12 4067.24 106.097   2
  -1   3  12 3969.77 106.894   1
   1  -3 -12 4011.34 104.295   1
  -1   3 -12 3830.07 102.585   2
   1   3 -12 3868.62 101.809   2
  -3  -1 -12 3455.87 95.0596   2
  -1   3  12 3820.33 100.472   4
   1   3 -12 3902.39 96.1649   4
   1  -3 -12 4001.30 101.015   2
  -3   1 -12 3903.13 94.9331   3
  -3   1  12 3965.66 100.992   3
   3   1  12 4244.28 87.2988   1
  -1   3 -12 4033.03 103.539   2
  -1  -3 -12 4036.39 102.958   2
  -1  -3 -12 3868.26 102.959   4
   3  -1 -12 3995.30 100.440   2
  -3   1 -12 4050.63 84.9258   1
  -3  -1 -12 4043.73 104.651   4
   1   3 -12 3377.27 92.2286   4
   3   1 -12 4325.44 101.623   4
  -3  -1 -12 3913.22 87.0977   1
  -1  -3 -12 4148.91 107.773   3
   1   3  12 4445.67 110.883   4
   1   3  12 4064.54 111.446   3
  -3   1 -12 3704.03 102.143   2
  -3   1 -12 4189.36 104.311   4
  -3   1  12 4037.30 103.564   1
   1   3 -12 3855.52 90.5023   1
   3   1 -12 3836.07 96.1155   1
   3   1 -12 3951.91 100.790   4
   3   1 -13 1.22741 6.05387   4
   3  -1  13 4.02830 5.57275   1
   1   3 -13 6.13755 5.29553   4
  -1  -3  13 4.02284 6.46586   1
  -3   1 -13-3.46476 5.65707   4
   3   1 -13 9.63497 7.69155   2
   1  -3 -13 6.33732 5.08667   2
   1   3 -13 5.69015 5.60742   1
   3  -1  13 6.69060 6.70994   3
   3  -1 -13 7.86707 7.68609   3
  -1  -3 -13 29.4756 10.4139   2
   1   3 -13 19.8645 7.04541   2
  -1   3 -13 8.52569 6.61290   4
   3   1 -13 4.85834 6.87030   2
  -1   3 -13 1.11765 4.16620   1
  -1   3  13 0.26810 5.17703   1
   1  -3  13 10.5029 5.40807   1
   3  -1  13 8.76537 7.73083   4
   3   1 -13-2.71917 5.19337   1
   3   1 -13-4.80599 4.95140   4
  -1   3 -13 6.95663 6.20714   2
   3  -1 -13 2.17155 7.06122   2
  -1  -3 -13-1.83327 4.62587   1
  -1  -3  13 10.1257 8.33530   3
   3  -1 -13 0.24970 4.40634   2
   1  -3 -13 0.55090 6.15826   3
   1   3  13 0.24665 5.15135   1
  -1  -3 -13 15.0810 10.2788   2
  -1  -3 -13 10.1620 7.00371   3
   1   3 -13 19.9959 9.55447   3
  -3   1  13 7.59150 7.44866   3
  -3   1  13 6.72131 7.56810   1
  -3  -1 -13 1.30707 4.14798   1
  -1   3  13 16.6354 7.81250   4
   3   1  13 9.89869 6.40905   1
  -3  -1  13 8.00272 7.14096   1
  -1  -3 -13-4.94010 6.21404   4
  -1   3 -13 17.6290 8.22029   3
   1  -3 -13-3.96631 4.23426   2
   1  -3 -13-3.07923 6.36123   4
   3   1  13 10.9783 8.80952   3
   1   3  13-0.78559 4.85393   4
  -3   1 -13-1.73657 5.36238   1
  -3   1 -13-4.98648 4.70263   2
   3  -1 -13 5.42479 6.76559   4
   3   1 -13 7.05875 5.08478   3
  -1   3 -13 0.69156 3.69961   4
  -3  -1 -13 8.77941 5.65685   4
  -3  -1 -13-2.92808 5.92170   2
   1   3  13-2.87205 6.78276   3
   3  -1 -13 25.9973 10.6467   1
  -3  -1 -13 13.5551 9.40028   2
  -3  -1 -13-3.61377 4.49813   3
  -1   3  13 17.5934 10.4831   3
  -3   1 -13 16.5316 9.09689   3
   3  -1 -13 8.79638 6.89980   4
   1  -3  13-1.05866 4.99519   3
   1   3 -13 10.6991 10.1731   2
  -3  -1  13 16.2602 10.5399   3
   1  -3 -13 20.2780 8.84928   1
   1   3 -13 7.37878 6.76614   4
  -1   3 -13 15.3729 11.5334   2
   3   1  13 3.98239 6.41672   4
  -3   1 -13 2.93949 8.71665   2
  -1   3 -14 653.910 46.3087   2
   1   3 -14 573.240 43.1719   2
   3  -1 -14 660.856 44.1435   2
  -1   3  14 582.474 45.0551   3
   3   1 -14 575.951 42.8345   2
  -3  -1 -14 619.931 43.9984   2
   1  -3 -14 566.907 43.3904   4
  -3  -1  14 618.851 41.7897   1
   1   3 -14 617.517 43.3029   4
  -1  -3 -14 635.666 45.9945   3
   1  -3 -14 487.518 42.0311   1
   3   1 -14 647.077 45.0019   4
  -3   1 -14 593.128 36.7951   1
   1   3  14 610.175 45.2843   4
   3  -1 -14 626.441 44.6083   4
   3   1 -14 621.406 42.2067   4
   1  -3 -14 611.022 42.6974   2
  -3  -1 -14 623.605 45.2359   2
   3   1  14 680.480 46.4315   3
   3   1  14 648.081 38.0321   1
  -1   3 -14 670.063 42.8517   3
   1   3 -14 632.333 42.4047   4
   3  -1  14 665.244 36.6145   1
   1  -3  14 694.872 38.9891   1
  -1  -3 -14 763.856 48.1702   2
   3   1 -14 549.326 40.7787   3
   3  -1  14 602.534 43.2473   4
   1  -3 -14 588.637 42.4789   2
  -1   3  14 493.256 39.6990   4
  -3  -1  14 683.311 44.9872   3
  -3   1 -14 646.075 44.9479   4
  -3   1 -14 657.707 47.0596   2
  -3   1 -14 601.144 41.2128   3
  -3   1  14 630.923 43.7913   3
  -3  -1 -14 487.446 39.7929   4
  -1   3 -14 678.239 44.8675   4
   3   1 -14 664.107 43.5498   1
   3  -1 -14 685.814 45.5797   4
  -1  -3  14 578.047 38.0880   1
   1   3 -14 501.663 38.0843   3
  -1  -3 -14 589.122 42.2839   2
   3   1  14 515.874 40.9524   4
   1   3 -14 591.540 43.2975   2
  -1   3 -14 581.594 36.8534   1
  -1  -3 -14 711.079 44.8050   1
   1  -3  14 672.166 41.9040   3
  -1   3 -14 525.458 39.9857   4
   3  -1 -14 497.321 41.5958   3
  -3  -1 -14 502.716 41.9487   3
  -1  -3 -14 640.422 45.8456   4
   3   1 -14 700.052 47.6249   2
   1   3  14 523.019 39.9839   1
  -1   3 -14 557.179 42.4779   2
   3  -1  14 669.635 43.1805   3
   3  -1 -14 606.985 43.6890   1
   3  -1 -14 644.911 45.3454   2
  -3  -1 -14 677.936 39.7621   1
   1   3  14 613.298 47.2783   3
  -3   1  14 522.425 41.2344   1
  -1   3  14 668.618 46.3734   1
  -3   1 -14 541.369 41.5452   2
  -1  -3  14 633.550 42.0661   3
   1  -3 -14 800.664 52.4949   3
   3  -1 -15 50.5894 14.4113   3
  -1  -3 -15 59.2484 15.2130   4
   1   3 -15 43.6379 13.1782   3
   3   1  15 39.3022 10.6965   1
  -3   1 -15 42.8488 13.2587   3
   3   1 -15 39.8094 14.1425   2
   1   3 -15 23.3116 11.6717   4
  -1   3  15 37.9547 13.2279   1
  -1  -3 -15 47.4780 13.7255   2
   3   1 -15 49.4867 15.4316   4
   3   1  15 41.8256 13.6564   3
   3  -1  15 58.8373 12.2535   1
  -1   3 -15 27.1936 11.6056   4
  -1  -3 -15 39.9305 13.8981   3
  -3  -1 -15 44.6262 14.3717   2
   1   3  15 27.1426 12.4831   3
   3  -1 -15 59.8942 15.2682   2
   1  -3 -15 21.7749 11.1768   2
   3  -1 -15 41.6041 13.4263   4
   3   1 -15 63.0293 18.0503   2
  -3   1  15 29.4831 11.7157   3
   1   3 -15 37.5263 11.5551   1
  -1   3 -15 31.3895 11.0172   1
   1  -3 -15 50.8124 13.9776   4
  -3  -1 -15 63.0110 15.4924   2
   1  -3 -15 45.2115 14.1975   1
   1  -3  15 49.1506 13.6939   3
   1   3 -15 23.6739 11.5595   4
   3   1 -15 53.2405 16.6400   3
  -1   3 -15 38.2163 12.1486   4
  -3   1  15 32.9258 12.6690   1
   1   3  15 30.4846 13.1475   1
  -3  -1 -15 17.8916 9.70045   4
  -3   1 -15 32.4900 12.3351   2
   1   3 -15 34.2804 13.1757   2
  -3   1 -15 55.9314 15.2088   2
  -3  -1 -15 65.6975 14.0338   1
   3   1 -15 24.5142 11.6424   1
   3  -1  15 42.6964 14.0279   4
  -3  -1  15 63.3379 15.5524   3
   3  -1 -15 51.6669 13.6955   2
  -3   1 -15 46.0933 11.2344   1
  -1  -3  15 55.7750 13.7814   3
  -1  -3 -15 52.1046 14.5775   2
   1   3 -15 42.1826 14.0405   2
  -3   1 -15 70.1190 16.7064   4
   3  -1 -15 24.9814 11.4096   4
   1   3  15 13.9358 9.58803   4
   3  -1 -15 41.0961 13.6745   1
   1  -3  15 56.1366 13.2959   1
  -1  -3  15 37.8632 11.4167   1
  -3  -1  15 55.4458 13.7695   1
  -1   3 -15 43.8736 13.9665   2
   1  -3 -15 18.8136 10.2928   2
  -1   3  15 25.8162 11.1644   4
  -1  -3 -15 46.4697 14.2379   1
  -1   3 -15 50.7361 15.2298   2
   3   1 -15 51.4670 16.0046   4
  -3  -1 -15 64.0858 16.6081   3
   1  -3 -15 44.6882 16.5052   3
  -1   3  15 24.8830 10.9412   3
  -1   3 -15 38.6043 14.1710   3
   3   1  15 25.4475 12.3351   4
   3  -1  15 22.9191 9.89477   3
   1   3  16 812.345 56.6802   3
   3  -1 -16 798.661 52.8107   2
  -1   3 -16 835.637 54.1852   4
   1  -3 -16 820.033 56.9894   3
   1  -3 -16 806.746 53.2149   2
  -3  -1  16 809.847 51.9086   1
  -3   1  16 807.299 54.4543   1
  -3   1 -16 917.066 56.2956   3
  -3   1  16 665.044 50.1204   3
  -3  -1 -16 762.070 52.5466   2
   3  -1  16 795.736 51.1125   3
  -3   1 -16 857.960 47.5510   1
   1   3 -16 930.325 56.9714   4
   3   1 -16 697.547 50.1401   2
   3   1  16 802.412 54.0693   3
   3  -1 -16 830.213 55.4998   3
   3   1 -16 828.066 51.9809   1
   3   1  16 790.864 46.1838   1
   1   3 -16 804.967 52.4123   3
  -1  -3 -16 858.649 52.5297   1
  -1   3 -16 796.203 53.2578   4
  -1  -3 -16 687.141 51.3953   3
  -1   3 -16 757.907 46.9617   1
   3   1 -16 749.959 51.7472   3
  -1  -3 -16 754.680 52.3291   2
  -1  -3 -16 890.025 57.5768   4
  -3  -1 -16 766.874 52.0993   3
  -1   3  16 925.694 58.0797   1
  -1  -3  16 774.943 50.9175   3
   3   1 -16 699.069 49.0366   4
   1   3  16 663.027 48.5577   1
   3  -1 -16 787.131 53.2676   1
   1   3 -16 866.743 57.0606   2
  -3   1 -16 790.608 55.7826   2
   3  -1  16 778.173 43.9268   1
  -1   3 -16 791.063 55.3748   2
  -1   3 -16 769.007 50.5220   3
   1  -3  16 730.808 48.5713   3
   1   3 -16 727.845 48.0050   1
   1  -3 -16 900.049 57.3483   1
   3   1  16 665.983 50.5000   4
   1   3  16 618.483 49.4338   4
   3  -1  16 697.443 50.0567   4
   1  -3 -16 772.907 54.1741   4
  -1   3 -16 667.549 50.0645   2
   1   3 -16 897.340 58.1787   2
  -3   1 -16 756.834 53.7004   4
  -3   1 -16 856.859 55.5147   2
  -3  -1  16 776.131 52.7297   3
  -1  -3 -16 668.506 49.0952   2
  -3  -1 -16 720.387 52.4457   4
   3  -1 -16 641.907 49.1837   2
   3   1 -16 867.869 57.2041   2
  -1   3  16 706.722 53.7077   3
   3   1 -16 775.987 52.9819   4
   1  -3 -16 758.406 51.1615   2
   3  -1 -16 826.080 54.0669   4
   1  -3  16 730.608 43.6492   1
  -1  -3  16 849.289 50.3870   1
  -3  -1 -16 830.487 48.2100   1
  -3  -1 -16 737.266 53.2190   2
   3  -1 -16 789.643 53.7973   4
  -1   3  16 837.226 55.6110   4
   1   3 -16 852.878 55.2675   4
  -3   1 -17 32.7998 17.0790   4
   3  -1 -17 32.9599 15.8258   3
  -1   3 -17 20.5427 14.1263   4
   3  -1  17 19.1699 9.27884   1
  -1   3  17-0.34603 7.64790   1
   1   3 -17 11.4685 10.6813   1
   1  -3 -17 14.4798 12.4183   1
  -1  -3 -17 32.0594 15.7641   3
  -3  -1 -17 8.01949 11.1168   2
  -3   1 -17 3.01224 6.89525   1
  -1  -3 -17 18.1100 11.8660   2
   1  -3 -17 16.4697 12.9470   2
   1   3 -17 31.1965 14.8133   3
  -3   1  17 6.10957 8.85515   1
   1   3 -17 25.7116 13.8999   2
  -3  -1 -17 18.7706 13.7778   3
  -1   3 -17 20.9659 14.1914   2
   1   3  17 12.1764 11.6695   3
  -1   3 -17 6.13230 10.2835   4
  -3   1 -17 27.9856 16.2352   2
  -1  -3 -17 16.8502 10.1499   1
   3   1 -17 12.1631 11.9346   4
  -1  -3 -17 26.9823 15.0808   4
   3   1 -17 3.43649 9.51636   4
  -1   3  17 16.3610 11.2380   4
  -3  -1 -17 6.73673 9.26720   2
  -1  -3  17 2.79725 7.33167   1
   1   3 -17 19.2703 13.0046   4
  -3  -1 -17 16.1234 11.9544   4
  -1   3 -17-0.26646 7.12494   1
   3  -1 -17 15.8935 11.4099   2
   1   3  17 20.7934 12.4732   1
   3   1  17 17.4653 13.1860   4
   3  -1  17 3.75398 7.91027   3
   1  -3  17 7.88580 8.74532   3
   3   1 -17 42.7155 16.1650   1
   1  -3 -17 11.3049 10.2779   2
   3  -1 -17 13.5180 11.4101   2
  -3   1  17-2.45055 6.22184   3
   3   1 -17 2.81602 9.01741   2
   3   1 -17 27.3302 14.8909   2
  -1   3 -17 13.1349 12.2677   3
  -3  -1 -17 15.3568 10.0285   1
  -1  -3  17 19.7689 10.2835   3
  -3  -1  17 9.87734 9.67290   3
   3  -1 -17 14.7176 11.7101   4
   3   1  17 26.4791 12.4146   3
   3   1 -17 20.4408 11.2030   3
   1  -3 -17 16.1183 10.6316   4
  -3  -1  17 3.15138 8.53471   1
   1   3 -17 4.23426 8.17814   2
   3  -1 -17 6.61492 9.08872   4
   1  -3 -17 30.0384 18.6276   3
  -1   3  17 3.38571 8.25352   3
  -3   1 -17 60.1992 16.8992   3
  -1   3 -17 4.22510 14.5994   2
   3   1  17 16.8708 9.87720   1
  -1  -3 -17 2.03252 7.03023   2
   1  -3  17 8.36224 8.88544   1
   3  -1 -17 14.6645 11.0807   1
   1   3 -17 19.7602 12.1874   4
   1   3  17 16.3135 12.8190   4
  -3   1 -17 8.81978 10.2525   2
   3   1 -18 2413.00 101.554   4
   3   1 -18 2513.05 104.042   2
   3   1  18 2301.62 100.279   3
   1  -3 -18 2440.92 98.3350   2
  -3   1 -18 2561.66 104.074   2
  -1  -3  18 2324.71 95.3545   3
  -1   3  18 2369.20 105.748   3
   1  -3 -18 2757.89 112.301   3
  -1   3  18 2471.73 102.688   1
   1  -3 -18 2510.13 100.845   1
   1   3 -18 2553.63 106.558   2
   3  -1 -18 2462.03 100.375   1
  -1   3 -18 2485.78 102.986   4
  -1  -3 -18 2327.92 96.1836   2
  -1  -3 -18 2681.49 107.750   3
   3   1 -18 2437.90 99.5433   1
   3   1  18 2329.59 101.800   4
  -3   1  18 2389.48 100.449   1
   3  -1 -18 2611.80 106.843   4
  -3   1  18 2297.85 99.5156   3
   3  -1  18 2532.29 98.8617   3
  -1  -3  18 2311.13 90.2763   1
  -1   3 -18 2250.02 99.8284   2
  -3   1 -18 2140.92 97.5098   4
   1   3  18 2475.65 99.9588   1
   3  -1 -18 2165.58 95.9630   2
   1   3  18 2522.70 108.891   3
  -3  -1 -18 2285.91 97.9902   3
  -1   3 -18 2509.96 91.4057   1
  -3  -1 -18 2525.93 105.576   2
  -1   3 -18 2453.00 98.2028   3
   3   1  18 2345.41 85.8028   1
   1  -3 -18 2449.46 102.991   4
  -3   1 -18 2271.59 85.6377   1
   1   3 -18 2314.80 98.8926   4
   3   1 -18 2560.71 103.682   3
   1   3 -18 2319.91 98.5414   4
  -1   3 -18 2193.04 96.3461   4
  -3   1 -18 2519.59 100.701   3
  -3  -1 -18 2388.88 101.972   4
   1  -3 -18 2398.44 99.2445   2
   1   3  18 2387.75 102.827   4
   3  -1  18 2098.38 78.4179   1
   3   1 -18 2243.52 99.2885   2
  -3  -1 -18 2488.92 90.5995   1
   3  -1 -18 2632.63 106.809   3
   3  -1 -18 2375.55 100.346   4
  -3   1 -18 2430.29 105.301   2
  -3  -1  18 2638.68 104.003   3
   1   3 -18 2446.70 104.569   2
   1  -3  18 2402.86 95.9299   3
  -1   3  18 2526.68 104.098   4
  -1  -3 -18 2424.59 102.660   2
   3   1 -18 2169.21 94.9715   4
  -3  -1 -18 2344.52 99.1353   2
  -3  -1  18 2279.77 94.6399   1
   1   3 -18 2218.71 95.2127   3
  -1   3 -18 2583.46 106.191   2
   3  -1 -18 2625.34 103.948   2
  -3   1 -18 2764.28 111.313   4
   1  -3  18 2320.39 87.5440   1
   1   3 -18 2234.65 89.7456   1
  -1  -3 -18 2536.41 104.649   4
  -1  -3 -18 2506.89 94.5685   1
  -3   1 -19 26.8644 17.3785   4
  -3   1 -19 21.6974 11.8694   1
  -1  -3 -19 42.1191 19.7805   2
   3  -1 -19 6.38355 10.9365   2
  -3  -1  19 42.2160 17.8331   3
   3  -1 -19 14.0499 13.0047   2
  -1   3 -19 35.4254 15.2659   1
   1  -3 -19 34.4991 18.0956   1
   1  -3 -19 46.8070 20.6325   3
   1   3 -19 45.0682 18.3192   4
   1   3 -19 39.4136 18.2125   4
  -3   1  19 45.9660 17.4324   3
   1  -3  19 26.8794 14.0073   3
  -3   1 -19 39.5507 18.3206   2
   3  -1  19 18.7964 13.1633   3
  -1   3 -19 26.5879 17.2705   3
   3  -1 -19 22.8549 14.8772   3
   1   3  19 50.4549 19.7668   3
  -1   3 -19 28.8503 16.4757   2
  -3  -1 -19 49.9754 19.2527   4
   3   1 -19 62.1110 22.6893   4
   1   3  19 43.1564 18.0568   1
  -3  -1 -19 39.4189 18.0950   2
   3  -1 -19 11.7907 13.1734   4
  -1   3 -19 32.4639 18.4886   4
  -1   3  19 20.6015 14.0027   3
  -1  -3 -19 46.3522 18.0374   4
  -3  -1 -19 32.8702 16.4550   3
  -3  -1 -19 16.8653 14.3451   2
   3   1 -19 20.6174 13.7161   2
   3   1  19 34.5863 18.4531   4
   3   1  19 14.9207 13.3997   3
  -3   1  19 16.0513 12.4177   1
  -3  -1  19 19.0515 14.4837   1
  -1  -3 -19 24.5321 13.2610   1
   1   3 -19 21.5132 15.7654   2
  -1   3  19 5.52726 12.4276   4
   3   1 -19 24.7691 17.2497   3
   3  -1  19 25.9690 12.2311   1
  -3   1 -19 16.4914 12.5888   4
   3   1 -19 12.8470 14.0291   4
   1   3  19 36.1436 17.3924   4
   3  -1 -19 17.6342 13.3721   4
  -1  -3 -19 19.7441 18.3726   2
   1  -3 -19 54.1420 20.2510   2
   3   1 -19 35.4482 15.7483   1
   1  -3 -19 34.7773 17.7110   2
  -3  -1 -19 14.1106 11.8453   1
  -1  -3  19 35.1586 16.1036   3
   1  -3 -19 52.2418 18.5266   4
   3  -1 -19 57.7023 20.7728   1
  -1   3 -19 20.6847 14.9729   4
   1  -3  19 40.0245 15.4238   1
  -3   1 -19 32.0074 16.0266   2
  -3   1 -19 16.7725 14.4641   3
   1   3 -19 20.1068 16.3942   3
   3   1  19 40.7894 14.4457   1
  -1  -3 -19 20.1773 19.2768   3
   1   3 -19 14.4081 15.9616   2
  -1   3  19 28.1290 16.9531   1
  -1   3 -19 21.5024 13.3263   2
   3   1 -19 29.8104 16.1909   2
   1   3 -19 25.3446 14.7511   1
  -1  -3  19 24.3112 15.3747   1
   3   1 -20 782.093 64.4621   4
   1   3 -20 882.850 66.3001   2
   3  -1  20 769.482 52.1091   1
   3  -1 -20 779.104 62.3114   4
   3   1  20 595.289 59.9613   4
   3   1 -20 746.876 60.1348   1
   1   3 -20 744.203 57.0557   1
  -3  -1 -20 877.472 66.0799   4
   1  -3 -20 679.278 55.8415   2
  -1  -3 -20 799.202 56.7387   1
   1   3 -20 860.480 65.7377   4
   3   1 -20 929.498 67.7883   3
  -3   1  20 668.051 58.8762   1
  -1  -3 -20 772.294 62.0279   3
   1  -3 -20 763.202 65.2668   4
   1   3  20 838.502 61.7975   1
   3   1  20 911.377 57.5731   1
   1  -3 -20 779.042 63.0286   4
  -3  -1 -20 828.430 63.2071   2
  -3   1 -20 853.775 55.3367   1
   1   3  20 775.485 62.4254   4
  -1   3 -20 870.331 65.9557   4
   3   1  20 818.908 64.4956   3
   1   3  20 771.667 65.9335   3
  -3   1 -20 951.916 66.7327   2
   1  -3  20 909.367 58.1394   1
  -3  -1 -20 866.276 64.3949   3
   3   1 -20 805.594 63.7190   2
   3  -1  20 756.674 59.6109   3
  -3   1  20 730.310 63.7149   3
  -3  -1  20 904.628 65.5827   3
  -1  -3 -20 854.538 63.9963   2
   3   1 -20 792.059 63.8072   4
   1   3 -20 788.412 62.2217   4
  -1   3 -20 843.817 66.0029   2
  -1   3 -20 765.504 62.2961   2
  -1  -3  20 793.501 63.1386   3
   3  -1 -20 860.248 64.9579   2
   3  -1 -20 825.931 61.1344   2
   3  -1 -20 855.190 66.9467   4
   1  -3  20 793.898 59.9682   3
  -1  -3 -20 707.761 58.1269   2
  -3  -1 -20 861.916 66.1441   2
  -3   1 -20 831.658 65.8444   2
  -1   3 -20 741.104 61.2008   4
   3   1 -20 884.877 65.7385   2
   1   3 -20 762.667 61.4983   2
  -1   3 -20 734.039 59.7394   3
  -3  -1  20 913.692 65.0277   1
   3  -1 -20 824.124 63.1518   1
   1   3 -20 785.438 62.0435   3
  -3  -1 -20 842.591 55.7541   1
  -1   3  20 836.714 67.3764   3
  -3   1 -20 780.041 64.0131   4
  -1   3  20 995.102 68.0547   1
   3  -1 -20 740.176 61.2736   3
   1  -3 -20 861.891 67.4938   3
  -3   1 -20 893.333 65.7301   3
  -1  -3  20 880.851 60.2119   1
  -3   1 -20 928.017 68.9307   4
  -1   3 -20 906.656 60.3207   1
   1  -3 -20 787.371 61.3129   2
  -3   1 -21 1.89832 16.2936   2
  -1  -3 -21 4.06411 12.2664   4
  -3  -1 -21 11.0205 15.8516   3
   1  -3 -21 9.83010 15.5504   1
  -3  -1 -21 3.64032 11.2628   1
   1   3  21 5.56419 15.2101   4
   1   3 -21 6.32922 15.7157   2
  -1   3  21 0.49097 12.8042   3
   3  -1 -21 7.64235 15.8615   2
   3  -1  21 8.13326 15.3228   3
  -1   3 -21 0.45635 11.9287   4
  -1   3 -21 5.82128 14.6661   2
  -3  -1  21 2.59807 12.4844   1
  -3   1 -21 8.68933 15.7534   4
   3  -1 -21 1.82078 14.9938   4
   1  -3 -21 7.93150 15.8979   4
  -3  -1 -21 2.29718 14.8010   2
  -3  -1 -21 4.38912 12.6306   2
   1   3 -21 3.21405 13.2647   4
   3   1 -21 16.1779 18.4310   4
   3  -1 -21 3.52370 14.1216   2
  -3   1  21 2.81084 13.3224   3
   3  -1 -21-0.46039 13.2590   4
  -3   1 -21 39.7835 21.0670   3
  -3   1 -21 8.48045 16.0355   4
  -1  -3 -21 24.3931 20.8325   3
  -1   3 -21-1.42159 13.5272   2
   1   3 -21 5.31840 14.0900   3
   1  -3  21 18.3353 15.5479   1
   3   1 -21 2.64905 15.1514   2
  -3   1 -21 9.36835 18.4071   2
  -1  -3 -21 4.82318 14.0740   2
   3  -1 -21 17.8411 18.5727   3
   3   1 -21 5.05853 15.2514   3
   3  -1  21 17.7537 14.3596   1
  -1   3 -21 6.83947 13.8366   4
   1   3 -21 15.5802 17.5834   2
  -3   1 -21 2.02179 11.2513   1
   1  -3 -21 2.83745 12.5445   2
  -3   1  21 11.0901 16.5802   1
   3   1  21 32.3458 21.1161   3
  -3  -1 -21 1.46222 16.4138   4
   1   3 -21 1.80578 12.2853   4
   1  -3 -21 10.4986 15.8665   3
   3  -1 -21 0.87058 14.1262   1
  -1  -3 -21 10.3512 14.6221   1
   3   1 -21 11.0215 15.5192   2
  -3  -1  21-0.44963 11.6414   3
   3   1 -21-0.42024 13.0428   1
   3   1  21 13.0867 13.3639   1
   1   3 -21 8.64802 14.3466   1
  -1   3  21 4.87076 15.4361   1
   3   1 -21 12.4335 17.4603   4
  -3  -1 -21 13.5691 16.1713   4
  -1  -3  21 10.0162 14.9044   1
   1   3  21 16.1266 16.4772   1
   1   3  21 12.2496 17.9987   3
   1  -3 -21-0.42972 11.2562   2
  -1  -3 -21 2.51729 13.5094   2
  -1   3 -21 2.61437 15.8045   3
   1  -3 -21 50.1612 19.8318   4
   1   3 -22 686.941 64.0082   2
  -1  -3 -22 543.973 56.9434   4
  -3   1 -22 655.953 52.9521   1
  -3  -1 -22 516.418 56.4521   4
  -3   1  22 533.102 55.6859   1
  -1   3  22 637.782 59.3182   1
   3   1 -22 770.047 65.2315   2
  -3  -1 -22 591.150 58.5301   4
   3   1  22 722.641 63.2953   3
  -1  -3 -22 567.134 51.0400   1
   3  -1 -22 594.794 57.3537   1
  -3   1 -22 518.504 59.0804   4
  -1   3 -22 564.719 51.1520   1
   1   3 -22 678.013 61.8901   4
  -3  -1 -22 505.164 56.9748   3
   1   3 -22 440.020 50.3149   3
   3  -1 -22 458.807 53.0513   4
  -3   1 -22 619.616 59.0690   3
  -3   1 -22 785.133 65.8150   2
  -1   3 -22 671.893 62.8271   2
   3   1 -22 591.729 57.9721   4
   3  -1 -22 711.155 61.3842   2
   1  -3 -22 685.418 62.3447   4
   3  -1  22 576.315 56.4700   3
   1   3 -22 773.587 66.3497   4
  -3  -1  22 500.155 54.5935   1
   1  -3 -22 786.819 69.3781   3
   3  -1  22 475.089 44.4905   1
   1  -3  22 536.082 49.8730   1
  -1  -3 -22 742.005 64.8075   3
  -1  -3  22 597.762 53.1767   1
  -1  -3 -22 481.269 55.1175   2
  -1   3 -22 611.264 57.1434   3
   3  -1 -22 615.963 57.3088   2
  -1   3 -22 539.205 55.9988   4
   3   1 -22 735.475 64.8886   4
   3   1 -22 681.746 61.3199   2
   3   1 -22 610.669 59.3548   3
  -3   1  22 684.763 63.9438   3
  -1   3 -22 589.508 59.1879   2
   1   3 -22 613.718 59.9185   3
  -1   3 -22 776.430 66.9738   4
   1   3 -22 690.245 59.2291   1
   1   3 -22 759.055 66.1691   2
  -3  -1 -22 650.843 60.5049   2
  -1  -3 -22 695.090 61.0107   2
  -3  -1  22 660.657 61.8256   3
   3   1 -22 633.788 59.3324   1
   3  -1 -22 562.403 57.4803   4
   1   3  22 658.905 57.8391   1
   1  -3 -22 620.346 58.9000   2
   1  -3 -22 634.463 61.1913   4
  -3   1 -22 570.156 58.7228   2
   1   3  22 385.590 53.0031   3
   1  -3 -22 571.665 56.0373   2
   3  -1 -22 689.008 64.9421   3
  -1   3  22 661.859 63.3082   3
  -3   1 -22 604.551 59.7325   4
  -3  -1 -22 571.455 58.8836   2
   3   1  22 644.993 53.8217   1
  -1   3 -22 372.078 47.5743   3
  -1  -3 -22 739.377 66.8271   4
  -3  -1 -22 652.563 51.2348   1
   3   2   0 28.6891 3.41912   1
  -3  -2   0 24.6922 3.90486   3
  -3  -2   0 38.5745 5.43556   4
  -2  -3   0 40.3793 5.52847   4
  -2  -3   0 32.7046 4.50907   1
   2  -3   0 27.5553 4.18932   1
   2   3   0 34.2070 4.63451   1
  -3   2   0 37.4846 3.16779   2
  -3  -2   0 36.6175 5.37680   2
   2   3   0 28.1412 4.25768   2
   3  -2   0 30.0598 4.53210   1
  -2   3   0 34.2090 4.23057   3
   3   2   0 25.9978 3.09045   1
  -3   2   0 36.0772 4.74596   1
   3   2   0 28.8090 4.58329   2
  -2   3   0 33.2164 2.87717   4
   3   2   0 36.1982 5.13094   4
   3   2   0 26.9459 3.92320   3
   3  -2   0 35.4737 3.20509   3
   2   3   0 27.9739 4.81680   4
  -2   3   0 37.5792 4.83521   1
  -2  -3   0 24.0484 3.91575   3
   2  -3   0 42.9339 4.57578   3
   2   3   0 44.7689 5.52577   3
  -2  -3   0 36.6694 5.20866   2
  -3   2   0 35.0623 3.31200   3
   2  -3   0 30.3282 2.68963   4
   3  -2  -1 2154.83 42.9854   1
   3  -2  -1 2260.25 26.8999   2
  -3  -2  -1 2069.87 39.5659   2
  -3  -2   1 1825.87 30.3071   1
  -3  -2  -1 2115.00 38.5344   4
  -3  -2   1 2183.41 40.1284   2
  -3   2   1 2207.33 42.1271   1
   3   2   1 2130.17 34.6391   3
   2   3  -1 2033.05 37.0534   2
  -2   3  -1 2010.80 28.9355   3
  -3  -2   1 2215.06 34.6304   3
   2   3   1 2344.29 42.5351   4
   2  -3   1 2141.67 34.4466   1
  -2   3   1 2008.49 35.4288   3
   2   3  -1 2132.40 38.4265   4
   3   2  -1 2096.91 39.5523   2
   3  -2  -1 1989.61 33.6960   3
  -3  -2   1 1986.89 35.5392   4
  -2  -3   1 2074.55 38.1035   2
   2  -3  -1 2077.68 35.9916   3
   2   3  -1 2215.30 36.0410   1
   3  -2  -1 2074.26 22.0090   4
  -2   3  -1 2047.25 22.6086   4
  -2   3  -1 2260.29 34.7044   1
  -2  -3   1 2133.74 38.5399   4
   2   3   1 2212.51 39.0576   2
  -3  -2  -1 2093.19 28.2042   1
  -3  -2  -1 2120.91 33.5198   3
   2   3   1 2106.08 34.3414   1
   2   3  -1 2318.87 36.6778   1
   3   2  -1 2200.33 33.5853   1
   3   2   1 2198.21 39.8862   4
  -2  -3  -1 2302.70 39.4888   3
   3   2  -1 2427.62 39.6608   4
   2  -3   1 2217.08 23.9125   4
  -3   2   1 1899.95 23.9752   2
   2  -3   1 2046.56 29.4248   3
  -3   2   1 2158.75 32.3689   3
   2   3   1 2156.76 39.2127   3
  -2  -3  -1 2297.64 35.6861   1
   3  -2   1 2137.54 27.0857   2
  -2  -3   1 2078.41 35.6959   3
  -2  -3  -1 2069.50 40.0304   4
   3  -2   1 2140.80 28.8333   1
   3   2   1 2305.40 29.5952   1
  -3   2  -1 2234.91 27.0691   2
   2  -3  -1 2050.27 27.6744   4
   3   2   1 2291.47 41.6625   2
   2  -3  -1 2174.92 41.0729   1
  -2  -3  -1 2399.73 41.1093   2
  -3   2  -2-4.76999 2.05511   2
   2  -3   2 0.18172 1.01199   3
   2  -3  -2 3.08943 1.46797   2
   3   2   2 4.48811 1.75030   1
   2   3  -2 5.22782 2.53062   3
   3   2   2-0.63111 1.69900   3
  -2   3  -2 1.92404 1.44716   4
  -2  -3   2 1.19749 2.05597   2
  -3   2  -2-0.14483 1.05836   1
   3   2  -2 1.10779 1.47245   3
   3  -2  -2-1.16228 2.77927   1
  -2  -3  -2 7.05093 3.21578   3
  -2  -3   2 2.36538 1.35009   3
   2   3   2 4.04903 1.46724   2
  -3  -2   2 1.24650 1.70385   2
  -2   3   2 0.23728 1.70752   4
  -3   2  -2 2.02480 1.33339   4
  -2   3  -2 0.50470 0.65900   3
   3  -2  -2 4.02815 2.53975   3
   2  -3   2 2.75908 1.06979   1
  -3   2   2 0.08198 1.71916   1
   3   2   2 5.32365 3.53434   4
  -2  -3  -2 3.47438 2.18563   2
   2  -3   2 1.43133 1.39106   4
   2   3  -2 0.44040 1.45177   1
   2   3  -2 3.34830 2.01953   4
   3   2  -2 7.95648 3.05032   4
  -2   3  -2 3.11420 1.59348   2
  -2  -3  -2 0.65539 1.56966   4
  -3   2   2 2.05383 1.76380   4
   3  -2   2 3.89977 1.66730   4
  -3   2   2 0.66435 1.56806   2
   2   3  -2 4.24276 2.17361   2
  -2   3   2-1.60572 1.59967   3
  -2   3   2-2.67387 2.31747   1
   3  -2  -2-0.25563 0.99869   4
   3   2   2 0.27168 1.84250   2
   2   3   2 0.95390 1.59691   1
  -3  -2  -2 5.28888 1.73775   4
  -3  -2  -2-0.98297 1.53234   3
  -2   3  -2 4.17151 1.91443   1
   3  -2   2 2.97446 1.60311   1
  -3  -2   2-1.22597 1.99927   1
  -3   2  -2 1.94330 1.04804   3
   2   3  -2 0.78860 1.11940   1
   2  -3  -2 0.50489 1.21689   4
   3   2  -2-2.87459 2.38218   1
  -3   2   2 2.83497 2.24521   3
  -3  -2  -2 1.44480 1.09447   1
  -3  -2   2 2.24385 1.99501   3
  -3   2  -2 3.36562 1.12902   3
  -2   3  -2 5.81752 1.89358   2
   3   2  -2 2.31010 1.91782   2
   2   3   2-0.96859 1.96751   3
   2  -3  -2 0.97490 2.04484   3
  -2  -3  -2 3.15670 1.25646   1
   2   3   2 1.01182 1.50048   4
  -3  -2   2 3.79746 2.48215   4
  -2  -3   2 4.26504 2.38863   4
   2  -3  -2 1.91753 0.82424   2
   2  -3  -2 1.02546 2.33280   1
   3  -2  -2 1.06534 1.24523   2
  -3  -2  -2 0.06898 1.50427   2
   3  -2   2 3.57210 1.96345   2
  -3  -2  -3 4700.35 64.4453   2
   2  -3  -3 4392.82 73.5109   1
  -3   2   3 4601.67 62.4971   3
   3  -2  -3 4380.09 64.1123   3
   3   2  -3 4030.33 54.4513   3
   3   2   3 4259.56 60.7993   3
  -3   2  -3 4593.36 39.2484   3
  -2   3  -3 4562.47 48.4167   4
  -3   2  -3 4522.73 39.9728   1
  -2   3  -3 4032.37 50.5070   2
   3   2   3 4646.49 48.7899   1
  -2   3   3 4411.26 68.4053   3
   2  -3  -3 4261.92 69.0505   3
  -2   3  -3 4234.16 48.6085   1
   2  -3  -3 4258.84 58.4510   4
   2  -3  -3 4214.29 50.2899   2
  -3   2  -3 4339.12 49.5353   4
   3   2  -3 4915.62 64.7513   2
   3   2  -3 4909.76 60.1951   1
   2   3   3 4593.65 61.1419   2
  -3  -2   3 4560.09 58.3573   1
   2  -3  -3 4189.47 50.2469   2
  -3   2   3 4345.61 51.6066   2
   3  -2  -3 4535.25 73.0682   1
  -2  -3  -3 4620.20 67.9809   4
   3  -2  -3 4318.19 51.6569   4
  -2  -3   3 4313.96 60.3989   2
   2   3   3 4584.05 67.0612   3
  -2  -3  -3 4329.67 63.9534   3
   3   2   3 4614.09 66.9845   4
  -3   2  -3 4417.41 40.8245   3
   2   3   3 4290.54 65.7967   4
   3   2  -3 4588.77 57.2478   3
  -2   3  -3 4624.86 49.0979   3
  -2  -3   3 4611.31 57.4517   1
   2   3  -3 4673.24 58.8482   1
  -2   3  -3 4411.08 46.6809   3
  -3  -2   3 4543.25 59.6746   4
  -3   2  -3 4603.93 53.4706   2
   2   3  -3 4570.98 59.2193   3
   3   2   3 4567.11 63.3338   2
  -2  -3   3 4796.19 62.1774   4
   3  -2   3 4282.28 55.5751   2
  -3  -2   3 4837.62 64.9194   2
  -2  -3  -3 4576.36 62.6248   2
  -3   2  -3 4194.97 36.8063   1
  -3  -2  -3 4450.52 64.0497   4
   3   2  -3 4534.55 59.8816   4
   2   3  -3 4151.82 58.2393   2
   2   3   3 4658.18 58.9816   1
   3  -2   3 4412.98 47.2176   4
  -2  -3   3 4512.25 58.4686   3
  -3  -2  -3 4564.02 44.5629   1
   2  -3  -4 276.628 14.8070   2
   2   3   4 251.720 15.9806   1
   2  -3  -4 267.785 16.2731   4
  -2   3   4 287.011 18.7316   3
  -2   3  -4 208.572 11.5336   3
  -3   2  -4 238.906 9.97401   1
   2   3  -4 231.789 14.7607   4
   3  -2  -4 252.662 18.1095   1
   3   2  -4 243.024 14.7846   4
  -2   3  -4 252.018 12.4714   1
  -2   3   4 229.354 18.0764   1
   3   2   4 214.222 15.7862   3
   3  -2   4 250.979 11.0323   3
   2  -3  -4 251.260 14.1792   2
  -2   3  -4 228.102 13.9584   2
  -3   2  -4 226.076 11.4161   3
  -3   2   4 261.754 16.2810   3
  -2  -3   4 250.917 14.9130   4
   3   2  -4 200.382 13.2715   3
  -2  -3   4 260.465 16.2374   2
  -3  -2  -4 201.444 10.7000   1
  -3  -2   4 232.103 14.4973   1
   2   3  -4 241.015 15.3840   2
  -2   3  -4 207.075 12.2245   4
  -3   2   4 216.304 13.3097   2
  -3   2  -4 229.556 9.48224   1
  -3   2   4 268.864 14.2934   4
   2   3  -4 245.113 14.5430   3
   3   2   4 251.473 14.0534   1
  -3   2   4 210.123 16.7631   1
  -2  -3   4 245.450 14.3550   1
  -2  -3  -4 244.422 16.8962   3
  -2  -3  -4 237.782 16.9890   4
  -2   3  -4 245.361 12.3584   3
   3  -2  -4 244.696 14.1093   2
  -3  -2  -4 241.197 15.2083   3
  -3  -2  -4 244.791 16.4615   4
   3   2   4 210.313 16.1065   4
   2  -3  -4 246.456 17.9601   3
  -3   2  -4 252.814 13.9081   4
   3  -2  -4 216.906 15.6131   3
   3   2  -4 228.468 14.2657   3
  -2   3  -4 224.010 11.3021   1
   2   3  -4 227.572 14.4376   3
  -2   3  -4 263.448 15.2781   2
   2   3   4 230.370 17.0577   3
   3   2   4 215.837 15.0363   2
  -2   3   4 225.759 14.4464   4
  -2   3  -4 232.034 13.0968   4
  -2  -3  -4 255.367 16.0954   2
   3  -2  -4 250.510 14.4207   4
   3   2  -4 219.245 13.8193   1
   2   3  -4 205.408 12.9404   1
  -3  -2   4 227.687 14.3124   4
  -3  -2  -4 234.709 15.6331   2
  -3   2  -4 219.075 13.4266   2
   3  -2   4 232.604 14.8307   2
  -3  -2   4 244.242 15.4644   2
   3  -2   4 239.893 13.0767   4
  -2  -3  -4 242.444 14.3468   1
   3   2  -4 230.010 15.2418   2
   2   3   4 230.524 16.3644   4
   2  -3  -4 237.791 18.4742   1
   2   3   4 236.140 15.2477   2
   3  -2  -5 4276.18 80.0104   1
  -3   2   5 4489.45 65.9257   4
   2   3   5 4093.51 70.3065   1
   3  -2  -5 3729.41 69.3114   3
  -3   2  -5 4149.49 63.3779   4
  -3   2  -5 4514.20 68.0582   2
   2   3  -5 4349.10 67.4269   3
  -2  -3   5 4554.08 69.4396   4
   3  -2   5 4087.31 52.5096   3
   2  -3  -5 4004.06 63.9316   2
  -2   3  -5 4237.85 62.0465   4
   2  -3  -5 4217.56 65.3116   2
  -3  -2   5 4461.29 70.9234   2
  -2   3  -5 3904.44 55.5014   3
   3   2   5 4473.42 77.9689   3
  -2   3  -5 4342.22 57.7059   3
  -2  -3  -5 4336.06 77.1666   4
   2  -3  -5 3986.46 79.2466   1
   3   2   5 4270.27 78.0184   4
   2   3   5 4371.78 80.2530   3
  -2  -3   5 4003.19 62.0531   1
   2   3  -5 4273.83 65.9383   3
  -3   2   5 4076.41 76.9784   1
  -2  -3  -5 4333.49 65.6807   1
   2   3  -5 4244.03 64.4070   1
   2  -3  -5 4125.72 77.6275   3
   3   2  -5 4494.25 68.5703   4
   3   2  -5 4167.61 65.0497   1
  -3  -2   5 4310.04 66.8432   1
  -2   3   5 4256.87 68.1998   4
   3  -2  -5 4186.78 65.0169   4
  -3   2  -5 4253.85 56.3761   3
  -3  -2  -5 4317.76 75.0943   4
  -2   3  -5 4128.14 53.7909   1
   3  -2   5 4117.20 44.4815   1
   2  -3  -5 3921.90 67.4150   4
   2   3   5 4363.08 69.9053   2
  -2  -3   5 4274.23 70.0355   2
  -2   3   5 3459.86 74.4741   1
   3   2  -5 4170.99 69.7439   2
  -3  -2   5 4649.91 68.4181   3
  -3   2   5 4126.08 64.2675   2
   3  -2  -5 4279.07 66.4453   2
  -3  -2   5 4138.45 65.9556   4
   2   3  -5 4217.95 67.0832   4
  -2   3   5 4193.40 77.0101   3
   2   3  -5 4357.23 69.5229   2
  -3   2  -5 4292.89 46.1327   1
   3   2   5 4412.63 71.6816   2
   3   2   5 3910.46 60.5923   1
  -2  -3  -5 3759.25 71.6302   3
  -3   2   5 3839.70 68.5218   3
  -3  -2  -5 4536.01 72.4159   2
  -2  -3  -5 4003.46 69.0520   2
   3  -2   5 4181.36 68.9427   2
   2   3   5 4619.23 80.8726   4
  -3  -2  -5 3981.45 68.6915   3
   2   3   6 9.18253 4.86879   3
  -2   3   6 0.77458 2.20676   4
  -2  -3   6 5.00684 3.56533   4
   3   2   6 9.06289 4.62266   4
  -2   3  -6 1.21146 1.86259   1
  -2  -3  -6 3.20701 2.65431   4
  -3  -2  -6 1.82438 1.88845   1
  -3   2  -6 1.92029 3.39198   4
  -2  -3  -6 3.99079 2.74751   3
   3   2   6 3.59929 4.69911   3
   2  -3  -6 7.59968 5.22383   1
   2  -3  -6 7.99241 3.50020   4
  -2   3  -6 3.58127 2.74963   4
  -2   3  -6 2.29098 2.68018   4
  -2   3  -6 0.11419 2.26515   2
  -3  -2   6 6.12632 3.86466   3
   2   3  -6 7.07934 3.31205   3
   3   2  -6-1.06686 2.00468   4
   2   3  -6 6.84314 3.16015   4
  -3  -2   6 6.79026 3.85375   2
   2   3  -6 6.31291 3.68471   1
  -3   2  -6 8.57654 4.83518   2
  -3   2  -6 1.13870 2.37102   3
   2  -3  -6 10.4387 4.88722   2
   3  -2  -6 11.0866 5.26600   2
   2  -3   6 4.42123 3.08752   3
  -3   2   6 3.14015 3.51296   4
   2  -3  -6 5.41477 4.22518   3
   2  -3  -6-1.59927 2.74675   2
   3  -2  -6 1.66615 3.87475   4
   2  -3   6 3.25414 2.73324   1
   3  -2  -6 15.7541 5.86711   3
  -2  -3  -6 3.21167 1.88372   1
   3   2   6 0.71182 2.79717   2
   2   3  -6 3.15836 3.70577   3
  -3   2  -6 4.76340 1.73147   1
  -2  -3   6 9.60895 3.96835   1
  -2   3  -6 14.4079 4.40463   3
  -3   2   6 8.04952 3.89433   3
   2   3   6 4.76506 4.24372   1
  -2   3   6 8.04930 5.05505   3
  -2   3  -6 7.72671 2.74055   2
  -3  -2  -6 3.29724 2.46058   2
   2   3   6 7.50131 6.03046   4
  -3  -2  -6 6.82635 5.63892   3
  -2  -3   6 3.29606 3.79560   2
  -3   2   6-1.85572 2.85337   2
  -2   3   6 12.1741 7.65739   1
   3   2  -6 3.96169 3.10680   3
   3   2   6 6.57705 3.70398   1
   3  -2  -6 4.30824 4.15556   1
  -3  -2  -6 2.70982 2.66935   4
  -2  -3  -6 2.66561 3.39521   2
  -3  -2   6 7.92950 3.31414   1
   2   3   6 17.3140 5.07501   2
   3  -2   6 10.0427 5.30397   2
   3  -2   6 6.85870 2.77558   1
   3   2  -6 2.03671 2.39606   1
   3  -2   6 4.27613 2.71080   4
   2   3  -6-0.78789 1.66153   2
  -3   2   6-0.99540 3.39465   1
   3  -2   6 3.59399 2.80285   3
   3   2  -6 1.77678 1.63603   4
   3   2  -6 5.32938 4.18784   2
  -3   2   7 4170.32 82.2550   3
   2   3  -7 4072.58 75.1195   4
   2  -3   7 4348.29 62.3528   1
   2   3  -7 4336.65 76.0883   3
  -2  -3   7 4377.95 76.0385   3
  -2   3  -7 4033.52 60.8991   1
  -2   3   7 4473.74 89.1461   3
  -2  -3  -7 3744.61 75.7714   2
  -2   3   7 4384.52 91.9031   1
  -3   2   7 4204.20 76.2335   4
   3   2   7 4211.10 85.5969   3
  -3   2  -7 4001.81 77.1196   2
  -3   2   7 4331.82 88.9829   1
   2   3  -7 4183.49 72.1643   1
  -3   2  -7 4725.27 61.6887   1
   3   2   7 4276.28 82.6639   2
   3   2   7 3688.65 81.6848   4
   2   3   7 4091.20 79.8202   2
  -2  -3   7 4099.73 79.2834   2
   3  -2   7 4342.18 82.2007   2
  -2   3  -7 3591.03 65.0420   3
  -2   3  -7 4292.19 73.9645   4
  -2  -3  -7 4294.40 85.8479   4
  -2   3  -7 4015.91 77.4892   2
   2   3   7 4321.81 88.4867   4
   2   3  -7 4408.89 81.4594   2
   2  -3   7 4073.10 66.2721   3
   2   3   7 4096.04 80.3521   1
  -3   2  -7 4495.38 79.3835   4
   2   3  -7 4249.61 77.7552   4
   3  -2   7 3855.66 70.5395   4
  -3  -2   7 4185.25 75.4037   3
  -3  -2  -7 4531.70 84.6270   3
   3  -2  -7 4300.96 78.4441   4
   3  -2  -7 4630.29 88.6577   3
  -2  -3   7 4313.07 74.6901   1
  -2  -3  -7 4282.40 75.7356   1
  -2   3  -7 3982.84 78.7724   2
   2  -3  -7 4219.39 76.6294   2
  -3  -2  -7 4366.63 69.4719   1
  -3  -2  -7 4114.65 79.7793   2
   2  -3  -7 4356.41 89.2494   3
   3   2  -7 4528.63 79.1981   4
   2   3   7 4415.84 91.7028   3
   2  -3  -7 4425.43 82.2655   4
   3  -2  -7 4012.52 75.0202   2
  -3  -2   7 4085.12 78.6589   2
   2  -3  -7 4233.40 89.1759   1
   3   2  -7 4628.67 80.7298   4
   3   2   7 4240.01 71.6272   1
  -3  -2  -7 4296.37 85.1095   4
  -2   3  -7 4415.02 76.5383   4
   3  -2  -7 4350.36 89.7428   1
   3   2  -7 4137.25 80.3221   2
  -2  -3  -7 4374.99 86.9083   3
   2  -3  -7 4348.89 79.1281   2
   3  -2   8 3.24641 3.62958   4
   2   3  -8 4.04885 3.90314   4
  -2   3   8 13.1495 5.36038   4
   3   2  -8 17.1589 6.49600   2
  -3   2   8 5.50160 5.49858   4
   2  -3  -8 7.50315 4.95359   2
  -2  -3  -8 8.10251 5.76833   1
  -2   3  -8 12.0076 5.07215   3
  -3   2  -8 8.97089 6.03950   4
  -2   3  -8 13.4607 5.81835   2
   2   3   8 20.7915 7.71143   2
  -2  -3  -8 15.2752 6.16994   3
  -2  -3   8 8.33415 4.69882   1
   2  -3  -8 6.54939 4.04550   3
   2  -3   8 3.19618 2.31482   3
  -2   3  -8 8.06150 5.12770   4
   3  -2  -8 1.49016 2.42473   3
   3   2   8 5.83620 4.72616   3
  -3   2   8 16.9717 8.41026   1
   3   2  -8 17.4870 6.97816   4
   2   3   8 16.5294 8.99068   3
  -3  -2   8 14.1472 6.24257   3
   2  -3   8 9.27394 4.26502   1
   3  -2  -8 5.81937 5.47895   2
   3   2  -8 7.97670 4.46174   4
   3  -2  -8 1.98311 2.56343   4
   2   3   8 13.4264 6.65379   1
  -3   2  -8 11.7956 5.35748   3
   2  -3  -8 13.1412 7.31456   4
   2   3  -8 4.93219 3.92495   2
  -2  -3  -8 18.6369 7.33210   4
  -2   3   8 0.69440 4.26631   3
   3   2   8 7.86909 4.78325   2
   3   2  -8 10.4247 5.35237   1
   3  -2  -8 18.5718 8.08720   1
  -2  -3   8 18.9254 6.50564   2
  -2  -3  -8 9.85591 5.53133   2
   3   2   8 8.05528 4.58594   1
  -3  -2   8 10.7183 8.09249   1
  -3  -2   8 6.03336 4.98204   2
  -3   2   8 17.2132 6.53183   3
   3   2  -8 4.50394 4.81337   3
   3  -2  -8 5.26519 3.88893   2
  -3   2  -8 9.69860 3.69220   1
   3  -2   8 4.68205 2.58966   1
   2   3  -8 8.31680 4.53117   4
  -3  -2  -8 3.11687 3.10875   1
  -2   3   8-0.37003 2.27752   1
   3  -2   8 8.26369 4.44608   3
  -3   2  -8 7.72754 4.16656   2
  -3   2  -8 4.71168 5.09913   2
  -2   3  -8 6.41721 4.09015   1
   2  -3  -8-0.71680 3.33958   2
  -3  -2  -8-1.31002 3.45206   4
  -2   3  -8 10.1593 5.03475   2
   2   3   8 9.85934 6.51756   4
  -3  -2  -8 0.30847 2.92993   3
  -3  -2  -8 8.33606 5.23751   2
  -2  -3   8 3.28031 4.03557   3
   2   3  -8 2.68854 2.97959   1
   2   3  -8 6.18768 4.95244   3
   2  -3  -8 8.38586 5.58324   1
   3   2   8 9.62611 5.17903   4
  -2   3  -8 8.06695 4.58398   4
   2  -3  -9 192.615 21.0033   3
   3   2  -9 258.263 21.0083   3
   2  -3   9 221.230 18.3678   3
   2   3   9 210.418 20.4310   1
  -3  -2  -9 247.799 22.7838   4
   2  -3  -9 204.262 19.5072   2
   3  -2   9 257.711 16.6563   1
   2   3  -9 203.366 18.8620   4
  -2   3  -9 222.141 20.1764   4
  -2  -3  -9 272.941 24.4276   3
   3  -2  -9 224.329 20.5488   4
   3   2   9 219.639 18.5449   1
  -3   2  -9 235.961 20.7434   4
   3   2   9 256.623 23.0306   2
  -3   2   9 184.883 18.3784   4
   2  -3  -9 227.887 20.7848   4
  -3  -2  -9 267.993 23.1912   2
   2   3   9 237.539 23.1250   3
  -3   2  -9 213.733 17.9985   3
   3   2  -9 245.720 22.4610   2
   2   3  -9 272.542 22.9857   2
  -3   2   9 234.758 23.1208   1
  -2   3  -9 185.424 18.3348   4
   3  -2  -9 201.889 21.0689   3
  -2   3  -9 224.499 16.6983   1
   3   2  -9 205.289 19.0360   1
   2   3  -9 184.591 17.4183   1
  -2  -3   9 243.470 22.0187   2
  -2  -3  -9 208.409 19.5215   1
  -3   2  -9 275.381 17.9797   1
   3  -2   9 213.100 17.7914   3
  -2  -3   9 226.489 19.7773   1
   3   2  -9 250.265 21.2562   4
  -3  -2  -9 266.868 19.6730   1
  -2  -3   9 210.406 18.8377   3
  -2  -3  -9 189.615 19.5221   2
   2  -3  -9 267.626 24.4898   1
   3   2   9 252.301 23.1781   3
   2   3   9 251.663 22.6100   2
   2   3  -9 225.187 19.9890   3
   2   3  -9 253.810 22.0247   4
  -3   2  -9 233.324 21.2118   2
  -2   3  -9 245.465 19.8934   3
   3  -2   9 263.614 21.4315   4
   3   2  -9 270.325 21.9207   4
  -2   3   9 241.311 21.6340   4
   2  -3  -9 208.691 20.1027   2
  -2   3  -9 223.954 21.3307   2
  -3  -2   9 236.396 20.4871   1
  -3  -2  -9 177.011 19.2317   3
   3  -2  -9 191.560 20.4777   1
  -3  -2   9 221.386 20.7841   2
  -2   3   9 239.408 22.7987   3
  -3   2  -9 261.223 22.7706   2
   3  -2  -9 194.531 19.3010   2
   3  -2  -9 159.177 17.2879   2
  -2   3   9 217.788 22.9036   1
  -2   3  -9 207.894 20.6312   2
  -3   2   9 275.429 24.0080   3
   2  -3   9 204.217 15.5707   1
  -2  -3  -9 171.481 19.3162   4
  -3  -2   9 229.090 20.0766   3
   3   2   9 201.766 21.2861   4
   2   3   9 250.474 23.5191   4
   2  -3 -10 67.1777 12.0941   2
   3   2 -10 49.9929 9.87402   4
  -3   2 -10 47.8505 11.1079   2
   3  -2  10 71.0905 9.19206   1
  -2   3  10 81.0697 15.0134   3
   3  -2 -10 84.8290 13.6844   4
  -2   3 -10 86.1231 14.5878   2
   3  -2  10 57.6807 10.3398   3
   2   3  10 68.2766 13.3358   4
  -3   2  10 52.6192 11.1089   4
  -3  -2  10 82.3746 12.3527   3
   2   3 -10 73.8351 12.5624   4
   2   3  10 52.4837 10.1847   1
   3  -2 -10 65.8729 12.6469   1
   2  -3 -10 42.4476 9.81887   4
   2  -3 -10 62.0111 12.5097   1
  -2   3 -10 79.2887 12.2067   4
   2  -3  10 46.3330 8.14963   1
  -2   3  10 57.6461 11.3594   4
   3   2 -10 72.1099 11.7763   3
  -3   2 -10 80.3012 12.8605   3
   3  -2 -10 69.4966 13.0192   3
   3  -2  10 85.6345 13.4186   4
   2   3  10 63.5204 12.1212   2
  -3  -2 -10 57.4688 11.1448   4
   2   3 -10 63.8524 12.5376   2
   3   2  10 59.8360 12.0814   2
  -2  -3 -10 73.6175 11.7565   1
  -2  -3 -10 77.0161 13.0577   2
  -3   2  10 77.6530 14.3088   1
   3   2  10 51.9290 9.64227   1
   2   3 -10 62.2716 12.4292   3
  -3  -2 -10 67.1715 12.3189   2
  -2   3 -10 56.3220 9.88866   1
  -3   2 -10 82.6135 10.8869   1
   3   2 -10 82.2067 12.4229   1
   2  -3  10 77.4658 11.4210   3
  -2  -3  10 59.2077 11.1864   2
   3   2 -10 77.9643 12.4435   4
  -2   3 -10 63.2684 12.0081   2
  -3   2  10 45.0788 10.3368   3
  -3   2 -10 77.8030 13.7518   2
   3   2 -10 76.0992 13.3448   2
  -2   3 -10 63.2371 10.9906   3
   3  -2 -10 72.6318 12.2697   2
  -2   3 -10 67.0485 12.4068   4
  -3  -2 -10 54.1121 10.6811   3
  -2  -3  10 79.1803 12.7676   3
   3   2  10 83.4552 15.2942   3
  -3  -2 -10 74.5183 11.0177   1
   2   3  10 49.8031 12.3734   3
   2  -3 -10 77.1257 13.1186   2
   2   3 -10 54.9792 10.2673   1
  -3  -2  10 92.6719 14.4860   2
   2   3 -10 40.4401 9.61088   4
  -3  -2  10 58.1951 11.0370   1
   3   2  10 47.6623 11.2830   4
  -2  -3 -10 64.1826 12.3030   4
  -3   2 -10 56.4938 11.8258   4
  -2   3  10 48.9344 11.9127   1
  -2  -3 -10 62.1792 11.7056   3
   2  -3 -10 55.3225 12.1520   3
  -2  -3  10 64.8878 11.2434   1
   3  -2 -10 64.6334 11.6700   2
   3  -2 -11 5083.63 115.009   3
   3  -2  11 4701.50 80.8163   1
   3   2  11 4972.89 111.456   2
   2  -3  11 4782.42 85.0354   1
   3  -2 -11 4610.12 101.739   2
   2   3 -11 5049.59 111.379   2
  -3   2  11 4048.12 101.639   3
   3  -2 -11 5101.63 109.497   2
   2  -3 -11 5070.04 107.455   2
  -3  -2 -11 4932.17 112.121   4
   3   2 -11 4620.27 99.3719   1
   2  -3  11 4114.23 88.7531   3
  -2   3  11 5004.03 115.993   3
   3   2  11 5155.09 98.5047   1
  -2   3 -11 4455.79 105.668   2
   3   2 -11 4683.86 101.337   4
   3  -2 -11 5206.66 109.318   4
  -2   3 -11 5119.22 107.031   4
  -3   2 -11 5040.89 107.337   4
  -2  -3  11 5020.06 109.106   2
   3  -2 -11 4774.31 112.136   1
  -3  -2  11 4655.19 100.196   1
  -3  -2  11 4979.63 103.669   3
   2   3  11 4032.43 97.2058   1
  -3  -2 -11 4206.38 100.433   2
   3   2 -11 3927.83 98.7256   2
   3  -2  11 4885.88 96.5039   3
  -2   3  11 5112.21 110.186   4
  -3   2  11 5455.78 119.414   1
  -2  -3  11 4700.96 99.6510   3
   2   3 -11 5211.90 106.867   4
   2  -3 -11 4650.40 104.510   2
  -2   3 -11 5005.23 90.7970   1
   3   2 -11 4613.88 101.957   3
   2   3 -11 5009.00 104.107   3
  -2  -3 -11 4564.82 102.942   2
   2   3 -11 4152.42 98.2144   4
  -2   3 -11 4208.68 102.461   2
  -2  -3 -11 5096.38 101.937   1
  -2  -3  11 4879.47 99.3738   1
   2   3 -11 4673.68 96.5979   1
   3   2 -11 4615.69 103.226   4
  -2  -3 -11 4895.48 111.298   4
  -3   2 -11 5072.18 110.582   2
   3  -2  11 4645.01 100.379   4
  -2   3 -11 5006.98 99.2920   3
  -2  -3 -11 3925.56 100.359   3
   3   2  11 4915.77 112.980   3
   2   3  11 5047.62 110.271   2
  -3   2 -11 3980.51 100.725   2
  -3  -2  11 5033.79 108.740   2
  -3  -2 -11 4652.35 105.772   3
   3   2  11 4688.44 111.661   4
   2   3  11 5232.76 120.627   3
  -3  -2 -11 4981.78 96.0223   1
  -2   3  11 5029.74 117.941   1
  -3   2 -11 5007.88 88.3383   1
   2   3  11 5459.02 118.787   4
  -3   2  11 4890.67 105.521   4
   2  -3 -11 4899.96 113.467   1
  -3   2 -11 4780.79 96.9000   3
  -2   3 -11 4282.68 96.8444   4
   2  -3 -11 4931.52 115.313   3
  -2  -3 -12 15.2003 8.44980   4
  -2   3  12 11.4776 6.75630   4
   2   3  12 18.4822 8.39340   1
  -2   3 -12 12.0360 5.47194   4
   2   3 -12 21.1239 9.14368   2
  -3  -2 -12 20.2742 8.59558   2
   2   3  12 15.4318 7.97815   3
   3   2 -12 10.5736 6.70405   4
  -3  -2  12 31.4714 10.4675   3
  -2  -3  12 31.4354 9.84338   1
   3  -2 -12 24.9276 9.07828   2
   3  -2 -12 27.5050 9.36932   3
   2  -3 -12 11.1353 7.70916   2
   2   3 -12 18.6774 8.71801   4
  -2   3 -12 27.0912 10.3159   2
  -3   2 -12 19.6319 9.02437   3
  -3   2  12 14.8083 7.06039   4
   2  -3 -12 34.7997 11.2833   1
  -2   3 -12 13.1102 7.84136   2
  -3  -2 -12 7.21242 8.13800   4
   2  -3 -12 19.0396 10.6209   3
  -3   2 -12 18.2713 7.54933   4
  -3   2 -12 15.5233 6.79208   2
   2   3 -12 10.9425 6.34085   4
   3   2 -12 30.8414 10.1576   3
  -3   2 -12 19.3516 5.85669   1
   2  -3  12 6.18965 4.66428   1
   3   2  12 19.5795 9.99566   4
   2   3 -12 10.0145 7.10457   1
  -2   3  12 24.8535 10.2669   1
   3  -2  12 7.89039 5.85576   1
   2   3  12-1.98292 4.62849   4
   3  -2  12 8.36576 4.48792   3
   3  -2 -12 21.4993 7.93091   4
  -2  -3  12 27.3807 8.17045   3
  -2   3  12 22.7244 10.4422   3
  -3   2 -12 9.28196 6.32453   2
   3   2 -12 30.0340 11.0591   1
  -2   3 -12 6.29344 3.96976   3
  -2   3 -12 21.8261 9.27552   4
  -3  -2 -12 21.1335 8.38007   3
   3  -2 -12 7.40593 5.27394   2
  -2  -3 -12 16.4625 8.70670   3
   2  -3 -12 23.3374 8.41377   2
   3   2  12 17.5331 8.28632   2
   3  -2  12 8.18750 6.09530   4
   2  -3 -12 48.3301 12.4146   4
  -2   3 -12 8.60894 6.44100   1
   2  -3  12 18.0273 7.18697   3
  -2  -3 -12 6.86703 5.37241   1
  -2  -3 -12 0.88106 4.60794   2
   3   2  12 3.50264 6.40195   3
   3   2 -12 17.1204 7.02580   4
  -3   2  12 14.5911 8.54352   1
  -3  -2  12 3.46445 4.53258   1
  -3  -2 -12 11.6993 5.49928   1
   2   3 -12 6.69224 5.63172   3
   3  -2 -12 15.7107 7.66522   1
   3   2 -12 11.7981 7.01516   2
   3   2  12 21.8604 8.48483   1
  -3   2  12 5.93352 5.27835   3
   2   3 -12 16.9228 7.52190   2
  -3   2 -13 139.160 20.1880   2
  -2  -3 -13 87.2305 17.2811   4
  -2   3 -13 94.8081 15.6311   3
   2   3 -13 131.216 19.0577   4
   2   3 -13 114.913 17.4170   1
  -2   3  13 122.279 18.9586   4
  -3   2  13 102.264 18.2010   1
  -2   3 -13 120.057 19.4783   2
  -3   2 -13 117.496 19.2790   2
   3  -2 -13 133.256 20.6528   1
   2  -3 -13 86.0429 15.9487   4
  -3   2 -13 84.3659 13.2811   1
  -3   2 -13 138.746 19.6016   4
   3   2 -13 131.708 20.0265   2
   3  -2 -13 141.466 22.3768   3
  -2   3  13 124.975 20.4986   1
  -3  -2  13 101.275 16.2481   1
   2  -3 -13 106.654 16.9376   2
  -3  -2 -13 120.376 19.3681   3
  -2  -3 -13 125.266 19.3076   2
   3  -2 -13 131.064 20.2402   2
   2   3 -13 123.443 18.6320   3
   3   2 -13 118.101 17.9097   1
  -3   2  13 98.0495 16.7293   4
   2   3  13 104.775 17.0151   1
   3   2 -13 131.921 19.8369   4
   2   3  13 160.652 22.4861   4
   2  -3 -13 153.010 22.8560   3
  -2   3 -13 150.801 20.2150   4
   2   3 -13 122.700 20.1282   2
  -2  -3 -13 97.8743 17.7387   3
   2  -3  13 106.876 16.1439   3
  -2  -3 -13 106.147 16.7802   1
   2  -3 -13 109.694 17.4708   2
   3  -2  13 128.711 17.8577   3
  -2  -3  13 98.1501 15.7120   3
  -2   3 -13 148.974 20.0567   4
  -3  -2 -13 122.094 17.8588   1
   2  -3 -13 75.3200 16.6365   1
   2  -3  13 109.945 14.4698   1
   3  -2 -13 108.363 18.0036   4
   3   2 -13 134.481 20.0092   2
  -2   3 -13 79.3339 15.6413   2
  -3  -2 -13 123.197 20.1590   2
   3  -2 -13 119.703 18.6437   2
  -2  -3 -13 98.0995 17.0764   2
   3   2 -13 79.8817 15.4993   4
   2   3  13 105.752 18.9365   3
   3   2 -13 117.599 18.1965   3
   2   3 -13 144.459 21.1992   2
   2   3 -13 110.510 16.8560   4
  -3   2 -13 137.734 19.0717   3
   3   2  13 140.655 21.1843   4
  -2   3 -13 110.701 15.3821   1
  -3  -2  13 104.780 16.7869   3
   3   2  13 91.7796 15.7291   1
  -3  -2 -13 139.810 21.0549   4
  -3  -2 -13 122.992 19.0485   2
  -2  -3  13 99.3092 16.1329   1
  -3   2  13 157.748 22.1007   3
  -2   3  13 133.099 21.1229   3
   3   2  13 110.265 19.5095   3
   3  -2  13 114.866 17.7494   4
   3  -2  13 129.686 15.1807   1
   2  -3 -14 17.2552 9.80275   1
   2   3  14 9.34485 8.21630   4
  -3   2 -14 5.20148 6.51002   3
   2   3 -14 8.04493 6.25289   4
   3  -2  14 14.6635 7.55096   3
   3   2  14-4.43302 7.41201   3
  -3  -2 -14-3.11307 6.48995   4
   3   2 -14 8.63414 10.1246   3
  -3   2 -14 3.73344 5.87815   1
   2   3 -14 7.00665 5.68333   2
   2  -3 -14 19.2353 9.52941   2
   2   3 -14 9.60227 8.67040   2
  -3  -2  14 8.70907 6.98241   1
  -2  -3  14 12.7903 8.57907   1
  -2  -3 -14 7.90639 8.59331   2
   3   2 -14 6.57244 6.01379   4
   3  -2  14 2.30916 5.57783   4
   3   2 -14 10.1696 8.22517   2
  -3  -2 -14-1.48803 5.04384   1
   2   3 -14 2.90100 7.63428   4
  -3  -2 -14 6.98666 8.19527   2
  -2  -3 -14 16.4394 9.00307   2
  -2  -3 -14 2.06944 4.57782   1
  -2  -3  14 10.3290 9.57755   3
   3  -2  14 4.22894 3.47261   1
   2   3 -14-5.55466 5.96487   1
  -3   2  14 12.6952 9.09283   3
   3  -2 -14 19.8792 10.1982   2
  -3   2 -14 0.29047 5.97244   2
  -2   3 -14 12.4978 7.95710   4
   3   2 -14 13.8006 8.62862   2
  -2   3 -14 1.86198 4.91678   3
  -2   3  14 14.8689 10.5942   1
   3   2  14 0.29467 5.38387   4
   2  -3  14 13.8868 7.58838   3
   3   2 -14 26.8697 11.2941   4
  -3  -2 -14 0.28050 8.12459   2
  -3  -2 -14 6.80399 6.70284   3
   2  -3 -14-0.78576 6.37851   2
  -3  -2  14 27.2834 10.6082   3
   2  -3  14 2.36227 5.71069   1
   2   3  14 11.7687 7.28409   1
  -2  -3 -14 3.98288 7.65003   3
  -3   2 -14 10.4012 7.70346   4
   2  -3 -14 17.4909 9.92273   4
  -3   2 -14 21.7398 11.3889   2
  -2   3 -14 9.34343 9.71558   2
   2   3 -14 26.5467 10.6360   3
   3  -2 -14 15.9589 9.02029   4
  -2  -3 -14 5.36738 9.47400   4
  -2   3  14-4.22570 7.99998   3
  -3   2  14 0.52073 5.11062   4
  -2   3  14 4.01323 6.25592   4
   3   2 -14 7.46589 6.30679   1
  -2   3 -14 3.87804 5.86567   4
   3  -2 -14 9.30944 9.25523   2
   3  -2 -14 11.3698 8.25586   1
  -2   3 -14 0.85168 6.54360   2
   3   2  14 6.72737 5.06247   1
  -3   2  14 2.85623 5.10708   1
   2   3  14 0.94181 5.52987   3
   2  -3 -14 17.7956 10.3618   3
  -2   3 -14 12.3233 6.60142   1
   3  -2 -14-2.93103 5.75107   3
   2   3 -15 2128.28 82.1205   3
  -2  -3 -15 2092.50 82.8245   2
  -2   3 -15 2048.02 82.2874   4
  -3  -2  15 2070.29 81.3115   3
   3   2  15 1948.32 84.0250   3
   2  -3  15 1918.54 66.8312   1
  -3   2  15 2242.77 89.0787   1
  -2   3  15 2065.61 87.9228   3
   3   2 -15 2042.65 81.0858   3
   3   2  15 1942.11 72.2023   1
   2   3  15 2175.84 89.7540   4
   2  -3 -15 2146.05 89.5795   3
  -3   2 -15 1947.91 81.2813   4
  -3   2 -15 2027.66 86.7638   2
   3  -2 -15 1900.69 82.7620   4
   2  -3 -15 2129.24 84.1335   2
  -3  -2 -15 2271.40 88.9280   2
  -3   2 -15 1885.51 67.1852   1
   2   3 -15 2154.49 82.3888   4
   2   3  15 2149.67 81.3121   1
   2   3 -15 1973.15 83.9976   2
   2  -3 -15 1846.12 77.3647   2
  -2  -3 -15 2063.17 85.1949   4
   3  -2 -15 2020.87 81.2843   2
  -2   3  15 2243.04 87.0221   4
  -2  -3 -15 2020.45 84.5026   3
  -2  -3  15 2153.05 81.3451   3
  -2  -3 -15 1885.63 80.2258   2
   3   2 -15 2325.81 88.6674   2
   3   2 -15 2115.69 81.5236   4
   3  -2  15 2113.00 79.2831   3
   3   2 -15 2058.20 85.7863   2
   3  -2 -15 2107.64 83.3998   2
   2  -3  15 2152.91 78.7128   3
  -2   3 -15 2230.33 88.6640   2
  -3  -2 -15 1928.70 83.3480   4
  -2   3 -15 1937.13 80.3903   4
  -3   2  15 2116.67 85.4651   3
   2   3  15 1846.34 84.8561   3
   2  -3 -15 1941.58 82.2353   4
  -2   3 -15 2067.90 78.7468   3
   2  -3 -15 2094.40 86.5881   1
  -3  -2 -15 2038.44 82.8735   3
   3  -2 -15 2116.25 83.7050   4
   3  -2  15 2218.15 68.7073   1
  -3  -2 -15 2020.60 83.0354   2
  -3  -2  15 2078.98 78.5868   1
   3   2 -15 2141.04 84.9159   4
   2   3 -15 2059.43 76.6192   1
  -3   2 -15 2005.91 77.3160   3
  -3   2 -15 1691.52 77.0173   2
  -2   3 -15 2144.29 72.5932   1
  -2  -3 -15 2109.86 77.4471   1
  -2   3 -15 2116.66 86.6597   2
   2   3 -15 1851.15 82.1799   2
   3   2 -15 2078.26 78.3804   1
   3  -2 -15 2152.20 88.6029   3
  -2   3  15 2103.12 87.7548   1
  -2  -3  15 2033.12 77.1646   1
  -3  -2 -15 2118.59 74.4486   1
   3  -2 -15 2151.81 86.3051   1
   2   3 -15 2093.76 83.4486   4
   3   2  15 2070.90 87.1884   4
  -2  -3 -16 28.8658 14.2785   3
   3  -2 -16 25.2299 13.4935   4
   3  -2 -16 5.72315 7.65371   2
  -3   2 -16 4.55800 7.43221   1
   2  -3  16 2.45749 6.63213   3
   2   3  16 1.08059 7.95786   3
   3   2 -16 15.9983 12.6626   4
   3   2 -16 8.94401 9.73804   2
  -2  -3 -16 6.87154 8.78437   1
   3   2  16 7.28574 9.14847   4
   2  -3  16 7.90302 8.31441   1
   2  -3 -16 29.1995 13.0513   2
   3   2 -16 5.52897 13.2269   2
   3  -2  16 2.05529 5.58676   1
   2   3  16 11.6296 10.7950   4
  -3  -2  16 2.37750 7.28220   3
   3   2 -16 12.6380 11.4071   4
   2  -3 -16 6.90414 7.44962   1
  -2  -3 -16 12.1710 13.7825   2
   3  -2 -16 14.6482 10.9909   1
   3   2 -16 22.2707 12.0981   3
  -2  -3 -16 7.53414 9.86028   4
  -2   3 -16 8.12652 9.60659   4
   3   2  16 16.2928 11.7177   3
  -3   2  16 4.96932 7.79518   3
  -3   2 -16 14.8278 11.0960   4
  -2  -3 -16 13.7593 14.0026   2
   2   3 -16 16.1936 11.1896   4
  -2   3  16 3.48587 8.35809   3
   2  -3 -16 2.14531 7.57965   2
   2   3  16 15.1484 12.0208   1
  -3  -2 -16 8.23314 11.9085   2
   3   2 -16 18.4303 10.8356   1
  -3   2 -16 13.7075 10.1408   3
  -3   2 -16 4.84254 10.6904   2
  -2   3 -16 20.7218 13.2628   4
  -2   3 -16 2.69017 8.06294   2
  -2   3 -16 9.40309 8.66712   1
  -3  -2 -16 16.3657 11.4262   4
  -2   3 -16 23.0250 14.6782   2
   3  -2 -16 15.6309 12.4159   3
   3  -2 -16 17.3803 11.2989   4
   2   3 -16 24.2941 13.2740   2
  -2  -3  16 2.34068 9.20493   3
  -3   2 -16 10.1530 9.35419   4
   3  -2 -16-0.62149 6.05370   2
   2   3 -16 12.6234 13.6071   4
  -3   2 -16 8.53562 10.3454   2
   2   3 -16 34.4537 14.2295   1
   2  -3 -16 11.5545 10.3642   3
  -2   3  16 17.1016 12.3854   1
   2   3 -16 22.2587 15.7186   2
  -3  -2 -16 17.5226 11.6096   3
   3   2  16 1.98365 7.45910   1
  -2  -3  16 21.6476 10.5926   1
  -3   2  16 7.24884 11.0618   1
  -2   3  16 0.62296 5.70635   4
   2  -3 -16 13.7071 11.1601   4
  -2   3 -16 17.8557 11.0041   3
  -3  -2 -16 24.1050 13.3735   2
  -3  -2  16 6.32676 7.57565   1
   2   3 -16 16.6811 10.4453   3
   3  -2  16 9.37195 9.90145   3
  -3  -2 -16 15.0890 9.36465   1
  -2   3 -17 90.1492 20.2372   4
  -3  -2 -17 112.160 19.0522   1
  -3   2 -17 88.5138 21.0218   2
   2   3  17 85.5413 18.7453   1
  -3  -2  17 70.7108 17.1946   1
  -3   2 -17 98.0401 21.1500   2
  -2   3  17 107.787 22.5015   3
   3   2 -17 123.240 23.9402   2
   2   3 -17 136.432 23.5929   4
   3  -2  17 97.3645 18.0940   1
  -2   3 -17 119.201 22.2808   3
   2   3 -17 158.771 26.5824   2
  -2  -3 -17 112.996 22.1448   2
  -3   2 -17 104.971 22.5599   4
   3   2 -17 128.083 23.4645   4
   2  -3 -17 111.085 23.3237   3
  -3  -2 -17 65.9796 17.6870   3
  -2  -3  17 121.319 22.5502   3
  -2  -3 -17 109.979 21.6327   4
  -2   3 -17 145.003 25.1042   4
  -2   3 -17 78.5857 20.2072   2
   2   3  17 117.486 23.6935   3
  -2  -3  17 125.849 21.4446   1
   3  -2 -17 110.503 23.3641   1
  -2   3  17 124.753 23.9039   1
  -3   2 -17 121.320 19.4818   1
   3  -2 -17 133.934 23.6376   4
   2   3 -17 96.8484 19.6004   1
  -3  -2  17 138.786 23.5756   3
   3   2  17 137.862 24.6307   3
   2  -3  17 119.581 18.5304   1
   3   2  17 136.211 21.5939   1
   2   3 -17 130.058 24.4522   2
   3   2 -17 130.127 23.8146   4
   2   3 -17 130.846 23.0755   3
   3   2 -17 142.554 25.4954   2
   3  -2 -17 118.799 22.4418   2
  -2   3 -17 143.115 24.9348   2
  -3   2 -17 149.130 25.7586   4
  -3  -2 -17 109.245 22.0022   4
   3   2 -17 98.2733 19.7453   1
  -3   2 -17 111.422 21.6402   3
   2  -3  17 126.380 21.6821   3
  -2  -3 -17 141.403 24.2683   2
  -2   3 -17 109.270 19.1683   1
  -3  -2 -17 121.559 24.9882   2
   3  -2 -17 118.593 22.7869   2
   3  -2  17 119.698 21.8723   3
   2  -3 -17 122.805 25.0196   1
   3   2 -17 114.796 22.6579   3
   2   3 -17 132.906 23.8560   4
   2  -3 -17 117.206 22.6344   4
   3  -2 -17 129.312 24.2646   3
  -2  -3 -17 128.965 21.5424   1
  -2   3  17 114.807 22.4804   4
   2  -3 -17 134.542 23.4610   2
   3   2  17 75.3032 18.2823   4
  -2  -3 -17 153.609 25.9406   3
   2   3  17 89.6106 20.5275   4
  -3   2  17 104.714 22.0089   1
   2  -3 -17 155.890 25.4189   2
   3  -2 -17 109.943 21.5368   4
  -3  -2 -17 129.502 24.1824   2
  -3   2  17 127.400 23.9695   3
  -3   2 -18 12.6116 11.7715   2
   3  -2 -18 23.2309 13.6267   1
  -2   3 -18 6.29187 10.6331   4
   3  -2 -18 37.3533 16.8003   2
   2  -3  18 11.0737 7.69012   1
   3  -2 -18 4.14460 9.96293   4
   3   2  18 10.1817 11.5252   1
  -3  -2 -18 7.27830 9.46496   1
   2   3  18 13.0873 13.5927   3
   2   3  18 16.7242 10.3573   4
  -3  -2  18 11.0351 10.2573   1
  -3  -2 -18 17.3011 11.5804   2
   3   2 -18 34.7606 15.8239   3
   2   3 -18 27.2443 13.3182   1
   3  -2  18 3.59533 8.56556   3
   2  -3 -18 29.3520 14.1041   1
  -3   2 -18 16.1120 11.5596   4
   2  -3 -18 13.4527 11.7480   2
  -3   2  18 15.4420 12.0780   1
   3   2 -18 18.8226 11.2169   4
   3   2  18 41.2216 17.1040   3
  -3  -2 -18 13.9939 13.2595   3
   3  -2 -18 44.3020 19.4477   4
   3   2 -18 25.7341 12.8212   4
  -2   3 -18 13.4577 9.79697   1
   3  -2 -18 30.5173 16.5193   3
   2   3 -18 9.49041 11.1135   2
  -2  -3 -18 12.1446 11.5123   3
   2   3  18 10.4455 10.8842   1
  -3  -2  18 19.6642 12.4690   3
  -3   2 -18 27.2054 12.7685   1
   3  -2  18 4.71278 6.62972   1
  -2  -3  18 20.3291 12.8649   3
  -2  -3 -18 16.1763 12.1227   2
  -2  -3  18 47.9437 16.1703   1
  -3   2 -18 7.48636 9.14996   4
   2   3 -18 14.3044 11.4105   4
  -2  -3 -18 28.8487 13.9604   2
   2   3 -18 15.4604 12.5788   2
  -2   3 -18 35.5879 14.8519   3
   3   2 -18 14.9366 10.7373   2
  -3   2 -18 34.7459 15.3956   3
  -3   2 -18 15.3026 11.7388   2
  -3  -2 -18 14.7617 11.1370   2
   2  -3 -18 26.4860 15.2974   3
  -3  -2 -18 48.5010 18.1151   4
  -2  -3 -18 29.6582 16.8967   4
  -3   2  18 15.1398 12.7357   3
   2   3 -18 33.2789 18.3910   3
  -2   3  18 11.4581 13.7213   1
   3   2 -18 10.3637 10.2495   1
   3   2  18 19.4677 12.6338   4
  -2   3 -18 23.1863 13.5255   2
   2   3 -18 34.4550 15.6597   4
   3   2 -18 17.5859 13.2864   2
   2  -3  18 7.46051 9.63015   3
  -2  -3 -18 15.2597 11.2986   1
  -2   3  18 11.5391 11.5351   3
   2  -3 -18 7.39638 12.1393   2
  -2   3 -18 9.80237 10.7928   2
   2  -3 -18 57.9732 19.8216   4
   3  -2 -18 32.4014 15.7960   2
  -2   3 -18 27.7304 14.8921   4
   2   3  19 1632.69 81.7951   1
  -3   2 -19 1523.32 86.6943   4
   2  -3 -19 1596.71 87.4272   4
   3  -2 -19 1781.82 87.3741   2
  -2   3 -19 1575.23 86.1657   2
  -3  -2  19 1806.94 88.3855   3
  -2  -3  19 1893.93 89.8982   3
  -2   3 -19 1698.26 85.2008   3
  -3  -2 -19 1837.16 90.3404   2
  -3  -2 -19 1785.94 90.2049   3
   2   3 -19 1725.66 88.9285   4
  -2   3 -19 1686.16 89.6550   4
   2   3 -19 1797.40 92.7927   2
   3   2 -19 1822.65 91.7930   2
  -2  -3 -19 1899.86 93.5712   2
   2  -3  19 1786.28 85.6717   3
  -3  -2 -19 1638.31 88.5109   4
  -3   2 -19 1733.72 76.9685   1
   2  -3 -19 1742.21 85.5755   2
  -3   2 -19 1651.01 88.3755   4
   3   2  19 1391.36 84.0934   3
   2   3 -19 1721.11 91.4098   2
  -3  -2 -19 1739.69 77.1618   1
  -3  -2  19 1892.98 89.4145   1
  -2   3 -19 1896.92 82.1283   1
   3  -2 -19 1891.30 93.3927   1
   3  -2 -19 1797.90 95.2192   3
  -2  -3 -19 1750.40 79.9652   1
   3  -2  19 1742.10 74.2206   1
  -2   3 -19 1878.70 92.4669   4
  -3  -2 -19 1596.89 87.1103   2
   3   2 -19 1623.91 86.8036   4
   3   2 -19 1737.91 91.1133   2
  -2  -3  19 1566.57 79.2688   1
   2  -3  19 1712.97 75.6158   1
  -2  -3 -19 1600.06 87.9887   3
   3   2 -19 1773.09 89.6977   4
   3   2  19 1740.68 80.3525   1
  -2  -3 -19 1819.11 89.2398   2
   2   3  19 1848.57 96.0034   3
   3   2 -19 1639.21 83.2134   1
   3   2  19 1801.64 94.7992   4
  -3   2 -19 1739.56 92.7771   2
   2   3 -19 1706.09 83.3869   1
   3  -2 -19 1754.05 90.2812   4
  -2   3 -19 1624.01 91.1542   2
   3  -2 -19 1998.34 93.5258   2
   2  -3 -19 1935.39 92.0191   2
   2  -3 -19 1791.31 95.4849   3
   2  -3 -19 1712.30 88.9006   1
   3  -2 -19 1833.26 92.3316   4
  -3   2  19 1527.96 85.0518   1
  -3   2 -19 1713.42 88.9849   2
  -3   2  19 2021.43 99.8125   3
  -2  -3 -19 1748.61 90.5668   4
   2   3 -19 1773.55 88.7442   3
   3   2 -19 1933.75 93.0444   3
  -2   3  19 1749.99 93.9112   3
   2  -3 -19 1933.38 96.4255   4
  -3   2 -19 1721.52 85.8144   3
   2   3 -19 2048.82 94.9728   4
   3  -2  19 1931.41 89.9430   3
  -2   3  19 1971.37 96.8934   1
   2   3  19 1928.84 97.8518   4
   3  -2 -20 31.2919 16.5426   2
  -2  -3 -20 26.4897 15.9731   2
  -3   2 -20-0.43243 12.3353   4
  -3  -2 -20 3.84157 14.7615   4
   3  -2 -20 15.4184 16.7768   4
  -2   3 -20 20.9086 14.1523   1
   3   2 -20 12.9236 13.9328   4
   2   3 -20 10.6626 13.9588   2
  -3   2  20 3.87045 13.8824   1
  -2   3  20 5.96497 13.1218   3
  -3   2 -20-0.43672 10.4617   4
   3   2 -20 5.85586 11.1543   4
   2   3  20 6.73253 14.9802   1
   3   2 -20 16.4179 15.4348   3
   2  -3 -20 22.9459 17.0393   1
  -2   3 -20 2.13719 13.3673   4
   3   2 -20 16.2161 16.3990   2
   3   2  20 8.53911 14.6410   3
  -3  -2  20 17.2710 13.5831   3
   3   2  20 18.8718 15.6090   4
   2   3 -20 12.4335 15.1366   1
  -2  -3  20 0.74108 9.80709   1
  -3   2 -20 12.7007 13.6157   3
   2  -3  20 4.03919 10.6157   1
   3  -2  20 13.0253 10.4551   1
   2  -3 -20 23.5836 17.8185   3
   2   3 -20 30.6686 17.1357   3
  -2  -3 -20 17.0099 14.4346   4
   2  -3 -20 4.71994 11.9553   4
  -2   3 -20 26.9460 18.0543   4
  -2   3 -20 7.58923 14.1738   3
   3  -2  20 9.19780 13.3328   3
   2  -3  20 32.1180 16.6881   3
   3  -2 -20 33.0597 19.4385   1
   2   3 -20 70.5506 23.3157   4
   2   3 -20 17.2607 16.8863   4
  -2   3 -20-0.89516 10.6097   2
  -3  -2  20 1.56671 11.0772   1
  -2  -3 -20 10.0827 14.9793   2
  -3   2 -20 7.53220 10.9697   1
  -3  -2 -20 15.2725 13.3879   1
   2   3 -20 43.9423 20.8375   2
  -3   2  20 14.3461 14.8321   3
   2  -3 -20 8.23950 14.2585   4
   2   3  20 5.53772 13.7195   3
   3   2 -20 12.0802 13.9387   1
  -3  -2 -20 17.2487 15.2461   2
  -2   3 -20 22.6049 16.0802   2
  -2  -3 -20 18.2622 15.2133   1
  -3   2 -20 14.4973 17.4692   2
  -3   2 -20 6.28118 13.2331   2
   3  -2 -20 19.2832 19.4382   3
   3   2 -20 5.72181 12.2953   2
   3   2  20 3.67967 11.0151   1
   2  -3 -20 11.2215 17.4258   2
   3  -2 -20 11.0028 15.1501   2
  -3  -2 -20 17.3588 15.1577   2
  -2   3  20 1.71596 13.8878   1
  -2  -3 -20 10.2439 14.3249   3
   2   3  20 18.1200 15.3454   4
   3  -2 -20 3.03577 12.1680   4
   2  -3 -20 17.3443 14.2499   2
  -2   3  21 106.634 25.6489   1
   3   2  21 110.587 27.8345   3
  -3   2 -21 75.8028 22.5402   3
  -3   2 -21 39.4223 21.3917   4
  -2  -3  21 131.783 26.9753   1
   3   2  21 105.238 23.5425   1
   2   3 -21 108.523 27.8551   3
  -3  -2 -21 83.1932 24.4400   2
   2   3 -21 119.893 32.9641   4
  -2  -3 -21 82.0808 25.0956   2
  -2   3 -21 31.9003 21.3102   2
  -3  -2  21 95.6520 24.1797   3
  -3  -2 -21 109.313 26.1148   4
  -2  -3 -21 86.1919 24.6600   2
   3  -2 -21 94.1151 24.8004   1
   2  -3  21 113.148 23.8506   1
   2   3  21 89.9094 25.4987   4
  -2  -3 -21 57.2185 21.0884   3
   3  -2  21 63.3971 20.9976   3
   3  -2 -21 169.460 31.6420   2
   3  -2 -21 109.588 27.3140   3
   3  -2 -21 56.3336 20.8890   2
   2  -3 -21 91.9131 25.9515   4
   3   2  21 51.2443 22.6379   4
  -3   2  21 53.9064 21.4259   1
  -3   2 -21 82.0880 24.8634   4
  -3  -2 -21 64.1189 22.4938   2
   3   2 -21 108.305 27.4244   3
  -3  -2  21 23.8948 16.0842   1
   3   2 -21 37.8565 18.2042   2
   2   3 -21 146.952 29.7361   3
  -3   2 -21 91.9895 21.2030   1
   2   3 -21 37.4286 18.9927   2
  -2   3 -21 107.926 22.2319   1
   2  -3 -21 104.562 25.3278   1
   3  -2  21 62.1652 17.6607   1
   2   3  21 45.6988 21.2667   3
   2   3 -21 55.1417 24.5451   4
  -2   3 -21 64.0996 23.0862   4
  -2   3 -21 157.683 33.4691   2
   2  -3 -21 64.0709 20.8036   2
  -2   3 -21 48.6378 20.0375   4
   2  -3 -21 124.357 29.0268   4
  -2   3 -21 81.3236 24.5637   3
   2   3  21 59.4625 20.5977   1
   2  -3 -21 105.757 28.0092   3
  -2   3  21 60.7989 23.5163   3
   2   3 -21 79.6968 23.7495   2
  -3   2 -21 77.7912 25.3100   2
   2  -3 -21 53.4692 19.4214   2
   3  -2 -21 80.2841 24.2248   4
   3   2 -21 148.605 29.7454   4
  -3   2 -21 69.8748 23.3431   2
   3   2 -21 93.5463 27.5355   2
   3   2 -21 95.2281 24.4579   4
  -3   2  21 65.9119 25.4683   3
  -2  -3 -21 65.5409 21.1704   4
  -3  -2 -21 33.4811 18.4255   3
   3  -2 -21 135.477 29.7379   4
   3   2 -21 56.7808 22.0663   1
   2   3 -22 12.5352 19.1209   2
   3  -2 -22 4.12378 16.2557   2
   3   2  22 9.31419 16.4794   1
   3   2 -22 20.5157 20.7174   2
   2   3 -22 3.98939 15.1755   4
   2   3 -22 4.52644 18.1920   2
   2  -3 -22 0.51033 16.3682   3
  -2  -3 -22 3.83318 14.7438   4
  -3   2 -22 8.98793 26.3341   4
  -2  -3  22 9.07809 15.9809   1
   2   3 -22 12.1405 16.8671   3
  -2   3 -22 2.01807 14.8432   2
  -2  -3 -22 1.35610 15.7090   2
  -2   3 -22 1.29196 15.7215   3
  -2   3 -22 13.6770 16.9590   4
   2  -3 -22 10.7875 18.3526   2
   2  -3 -22 4.39462 16.2707   4
  -3  -2 -22 6.80012 13.2988   1
   2   3 -22 12.1577 17.3290   1
  -3   2 -22 4.06462 16.4220   2
   3   2  22 3.04931 16.8029   3
   3  -2 -22 9.19789 19.2914   4
  -2   3  22-1.03614 17.1349   3
   3  -2 -22 7.90320 17.8735   2
   3   2 -22-0.44710 16.0363   1
   3   2 -22 7.27566 18.8671   4
  -3   2 -22 2.15354 13.8418   1
   3  -2  22 7.25471 14.0890   1
  -3   2 -22 21.1110 19.0324   3
  -2  -3 -22 12.7724 18.5394   3
   2  -3  22 13.1654 16.8742   1
   2   3 -22 23.8359 21.1963   4
  -2  -3 -22 13.6396 20.1982   2
   3  -2 -22 17.2265 20.7863   1
  -3   2  22 8.66674 18.8750   1
  -3  -2 -22 16.4002 20.8925   2
   2  -3 -22 39.2168 20.9481   2
   3  -2 -22 1.96003 15.4470   4
   3   2 -22 6.47704 16.4886   4
   2  -3 -22 11.5117 19.4678   4
  -2  -3 -22-0.36124 12.8112   1
  -3  -2 -22 1.39280 16.2537   3
  -3  -2 -22-0.51784 15.5723   4
  -3   2  22 6.11519 22.3769   3
  -3  -2  22 46.1088 22.1684   1
  -2   3 -22 10.9203 17.8272   2
  -2   3  22 4.80669 17.4601   1
   2  -3 -22 52.6542 25.7501   1
   3  -2  22 16.0458 19.7403   3
  -3  -2 -22 7.19808 17.6717   4
   2   3  22 4.17717 18.5509   3
  -2   3 -22 0.46048 16.4494   3
   3  -2 -22 17.2832 19.6983   3
   2   3  22 5.01549 16.7200   1
   3   2 -22 13.2961 20.5365   3
  -3   2 -22 9.09035 16.2661   2
   3   2 -22-0.49544 14.5131   2
  -3   2 -22 0.49043 16.4282   4
  -2   3 -22 25.6578 20.7099   4
   2   3 -22-0.94518 16.5608   3
  -3  -2 -22 2.78344 15.5208   2
   3   3   0 10071.9 76.7795   1
  -3  -3   0 10289.1 77.8654   1
  -3   3   0 9510.02 82.0582   1
  -3  -3   0 9232.93 88.6601   2
  -3  -3   0 9656.09 80.8857   3
   3   3   0 10446.9 84.7568   3
   3  -3   0 10783.9 88.4588   1
   3   3   0 9290.01 87.3054   4
   3   3   0 9750.66 90.2834   2
   3  -3  -1 2.18795 2.30596   1
  -3   3  -1-0.05898 0.74094   2
   3  -3  -1 2.66218 1.50027   4
   3  -3   1-0.38977 0.96332   1
  -3  -3  -1 2.63862 2.20136   2
   3  -3   1 1.42816 0.74512   3
   3   3   1-0.12848 2.18874   3
  -3   3   1 3.49813 2.86160   1
  -3   3   1 1.87247 0.82583   2
   3   3  -1 3.76915 1.75926   2
   3   3  -1 0.43683 1.19050   1
   3   3   1-0.14749 2.85020   2
  -3  -3   1 1.43826 1.24511   3
  -3   3  -1 4.23567 2.13953   1
  -3  -3  -1 1.29033 1.93450   3
  -3  -3   1 7.87889 2.85463   4
  -3  -3  -1 0.90804 1.10089   1
  -3   3   1 2.10996 1.64940   3
   3   3  -1 2.34829 1.30807   1
  -3  -3  -1-3.67210 2.80989   4
   3  -3  -1 7.47290 2.73511   3
   3   3   1-0.77025 1.66024   1
  -3  -3   1 2.99513 2.40230   2
  -3   3   1 1.09667 1.02032   4
  -3   3  -1 2.14533 1.47026   3
   3   3   1 2.72867 2.01729   4
   3   3  -1 1.65132 1.42553   3
   3   3  -1 2.68657 2.19389   4
  -3   3  -2 755.727 15.8294   4
   3   3   2 772.163 25.4083   3
   3  -3   2 609.384 17.3720   2
  -3  -3  -2 619.200 21.9621   3
   3  -3  -2 696.943 25.4863   3
   3  -3  -2 759.946 20.2944   4
  -3  -3   2 709.375 22.8199   3
   3   3  -2 700.993 25.0833   2
   3   3   2 660.646 25.1255   4
   3   3  -2 733.217 22.8085   1
  -3   3  -2 734.660 19.5337   1
  -3   3   2 713.453 24.5795   3
   3  -3  -2 683.016 28.3583   1
   3  -3  -2 694.266 16.4673   2
  -3  -3  -2 782.920 27.2355   4
  -3  -3   2 716.153 22.4437   1
  -3   3  -2 756.708 17.1587   2
  -3  -3   2 754.189 25.8301   2
   3  -3   2 773.805 20.0957   1
   3  -3   2 720.106 16.1578   3
  -3   3   2 710.373 18.0192   4
  -3  -3  -2 673.489 19.6684   1
   3   3   2 721.179 25.4005   2
   3   3  -2 845.607 26.2059   4
  -3   3  -2 717.035 16.0690   3
  -3   3   2 758.184 17.3988   2
  -3  -3   2 749.103 24.8011   4
  -3   3   2 763.010 29.5243   1
   3   3  -2 627.577 21.6432   3
  -3   3  -2 742.956 14.8470   4
  -3  -3  -2 728.852 25.7263   2
   3   3   2 784.932 21.4124   1
   3  -3  -3 0.06333 1.99017   4
  -3   3  -3 2.46877 1.94933   4
  -3   3  -3 10.2898 2.56015   4
  -3  -3  -3 4.61283 3.03401   3
   3   3  -3-0.69164 1.54617   1
  -3  -3  -3 0.68762 1.78363   2
  -3  -3   3 4.21121 1.29932   3
   3  -3  -3 0.15215 1.25109   2
   3   3   3 0.55032 3.13237   4
   3   3  -3 2.04141 2.22890   2
  -3  -3   3 1.42527 1.75115   1
   3  -3  -3-0.23196 1.53460   1
  -3   3  -3 1.37956 1.56948   3
  -3   3   3 1.11219 2.03473   4
   3   3  -3 6.06811 3.32288   3
   3  -3   3 3.07292 1.78873   2
   3   3   3-1.95827 2.32528   3
  -3   3  -3 4.69170 2.05797   2
  -3  -3  -3 1.17429 1.28848   1
   3  -3  -3 5.21492 3.62688   3
  -3   3   3 5.28875 4.04823   1
   3   3   3-0.08316 1.39786   2
  -3  -3  -3 0.09068 2.01895   4
  -3  -3   3 2.07017 3.04172   2
  -3   3   3 1.03508 1.87701   2
  -3   3   3-4.02093 3.69523   3
  -3   3  -3 2.23258 1.43437   1
  -3  -3   3-2.68860 2.73218   4
   3   3  -3 7.69160 3.22567   4
  -3   3  -3 0.94332 0.79706   3
   3   3   3-0.46574 1.79939   1
   3  -3   3 2.34718 1.75853   1
   3   3  -4 1025.95 31.9486   4
  -3  -3   4 939.701 30.9874   4
  -3  -3  -4 955.682 25.6474   1
   3   3  -4 1136.69 33.0072   3
   3  -3  -4 1030.46 39.8856   1
   3   3   4 944.979 28.7457   1
   3  -3  -4 1027.82 36.6154   3
  -3   3  -4 1028.04 23.5823   3
  -3  -3   4 1073.16 31.4440   1
  -3   3  -4 866.474 24.7130   4
   3   3   4 823.117 32.4620   4
   3   3   4 963.108 32.1840   2
  -3   3   4 1050.14 39.6439   1
  -3   3  -4 1019.30 27.0138   4
   3  -3  -4 1039.20 29.0429   2
  -3   3  -4 1061.14 23.4802   1
   3  -3   4 1071.48 30.9171   2
   3   3   4 907.649 33.2217   3
  -3   3   4 1061.77 35.3769   3
  -3   3   4 975.365 28.5857   4
  -3   3  -4 842.987 26.1024   2
  -3  -3  -4 879.393 32.8050   4
   3  -3  -4 1024.37 30.3860   4
   3   3  -4 949.355 31.7512   2
  -3   3  -4 1002.99 23.8559   1
   3   3  -4 826.715 27.7985   3
   3  -3  -4 979.638 27.9134   2
  -3   3  -4 1105.86 25.3202   3
  -3  -3  -4 965.210 32.6836   3
   3   3  -4 992.567 30.1821   1
  -3  -3   4 955.425 32.0756   2
  -3  -3  -4 1012.59 33.5897   2
  -3  -3  -5-2.74559 2.19389   2
  -3  -3  -5 5.29539 3.89884   3
  -3   3   5 6.20580 2.70573   1
  -3   3  -5 3.26096 2.28995   3
   3   3  -5 5.40676 2.74243   1
  -3  -3  -5 0.65932 1.60413   1
   3  -3  -5-4.68186 3.61702   2
  -3  -3   5 1.99302 2.32504   1
  -3  -3   5 2.22452 3.11372   4
  -3   3  -5-1.50715 1.92380   1
  -3   3  -5 1.00017 1.44020   1
   3   3  -5 2.10059 2.43780   3
  -3   3  -5 4.70141 2.70890   2
   3   3   5 0.20641 2.68931   2
  -3  -3   5 0.41542 2.57326   2
   3  -3  -5 0.28470 1.59954   4
   3  -3  -5-7.44334 4.53778   1
  -3  -3  -5-5.67703 4.58181   4
   3   3  -5 3.27805 2.41713   4
  -3   3  -5 0.95280 1.76311   2
   3   3  -5 3.98638 3.68865   2
   3   3   5 2.18165 2.96999   4
   3   3  -5 2.14151 2.89107   3
   3  -3  -5-0.12880 2.93701   3
   3   3   5-3.31704 1.85010   1
   3   3   5-1.81626 3.45213   3
  -3   3   5 4.00812 4.25777   3
  -3   3  -5-0.76548 1.06308   3
   3  -3  -5 0.50599 2.34610   2
  -3   3   5 1.33869 1.66060   4
  -3   3  -5-1.02761 2.01240   4
  -3   3  -6 3235.81 66.4169   2
  -3   3  -6 3348.55 55.8069   3
  -3  -3  -6 3114.21 70.6580   4
  -3   3  -6 3320.23 48.3766   1
   3   3   6 3368.63 66.4835   1
  -3  -3  -6 2784.68 63.2664   2
   3  -3   6 3257.03 58.3930   4
   3  -3  -6 3271.04 65.0473   4
  -3   3  -6 2957.81 47.0927   1
  -3  -3  -6 3485.09 59.4093   1
   3  -3  -6 3052.49 60.7540   2
  -3  -3   6 3448.07 68.8570   2
   3  -3  -6 3384.47 75.0104   3
  -3   3  -6 3356.62 62.8996   4
  -3   3   6 3360.07 72.1291   3
   3   3  -6 3309.50 62.6205   1
   3   3  -6 3694.39 68.9752   4
   3  -3  -6 3547.13 65.6985   2
  -3   3   6 3602.95 66.2828   4
   3  -3   6 3200.48 51.3783   3
   3   3   6 2746.52 61.9574   2
   3  -3  -6 3193.02 76.8813   1
   3   3   6 3348.74 76.0376   4
  -3  -3   6 3100.03 62.7553   4
   3   3  -6 3504.61 69.7047   2
   3   3   6 2904.01 70.6671   3
  -3  -3  -6 3269.52 70.7723   3
  -3   3  -6 3335.72 65.0799   2
  -3   3   6 3227.84 77.0037   1
   3   3  -6 2946.11 61.9005   3
  -3  -3   6 3336.22 64.0245   1
  -3   3  -7-4.95613 3.06851   3
   3   3  -7 2.45573 3.09930   2
   3  -3  -7-0.12501 2.67475   2
   3  -3   7-0.28102 1.90895   1
  -3   3  -7 0.93609 1.25284   1
  -3   3   7-1.75298 3.56640   4
   3  -3   7 2.69407 1.91043   3
  -3  -3  -7 6.78398 5.06660   3
   3  -3  -7 5.71213 5.38212   4
   3  -3  -7 1.79750 2.50968   2
  -3   3   7 10.9941 7.66005   1
  -3   3   7-0.76672 2.99638   3
   3  -3  -7 1.13589 2.88363   3
   3  -3   7 2.25105 2.49490   4
  -3  -3   7-1.34680 2.46626   1
   3   3  -7 10.1761 6.18811   1
  -3  -3   7 1.07685 3.23101   2
  -3  -3  -7 6.96153 5.11994   2
   3   3  -7-0.71782 3.01337   3
  -3   3  -7 3.55871 3.34988   4
   3   3   7 0.27697 2.13108   2
   3   3   7-2.50272 4.13646   3
  -3  -3  -7 6.94980 5.40551   4
   3  -3  -7 6.44099 5.72658   1
  -3  -3  -7 2.26773 2.36175   1
   3   3   7 6.74069 5.21661   4
  -3   3  -7-2.14255 3.51552   2
   3   3   7 1.54673 2.77516   1
   3   3  -7-0.25556 2.13582   4
   3   3  -7 4.23068 3.62499   3
  -3   3  -7 1.30650 3.88903   2
   3   3   8 6334.12 116.405   3
  -3  -3  -8 5947.77 107.959   4
  -3   3  -8 5001.41 93.6822   2
  -3   3   8 5377.46 95.1040   4
  -3  -3   8 5114.55 95.3427   2
   3  -3  -8 5840.34 113.277   1
  -3  -3  -8 6156.17 105.073   2
  -3  -3   8 5770.56 95.2380   3
   3   3   8 6183.19 114.239   4
   3  -3  -8 5679.50 97.4010   2
   3   3  -8 5790.57 101.812   2
  -3  -3  -8 6441.56 109.746   3
   3   3  -8 6162.55 99.8381   4
   3  -3  -8 5989.13 101.364   4
   3  -3   8 6292.07 94.7574   4
  -3   3  -8 5969.06 96.1168   4
  -3   3  -8 5210.38 97.2338   2
   3   3   8 5749.78 97.1304   1
   3  -3  -8 5855.82 97.0245   2
   3  -3  -8 5781.65 109.910   3
   3  -3   8 5947.63 84.1383   3
   3   3  -8 6251.50 97.2905   1
  -3  -3   8 6369.80 100.140   1
  -3   3  -8 6325.46 91.1820   3
  -3  -3  -8 6607.43 94.0665   1
   3   3   8 5868.75 103.464   2
   3   3  -8 5772.77 98.6023   4
  -3   3  -8 6387.95 78.9301   1
  -3   3   8 6122.02 110.505   3
   3   3  -8 6232.87 98.8932   3
  -3  -3  -9 3.19606 4.28526   4
   3  -3   9 2.20269 3.15149   3
  -3  -3  -9 3.42860 3.12639   1
  -3   3  -9 3.16755 3.49891   2
  -3   3   9 1.53491 3.54326   3
  -3   3   9 3.25346 3.36121   4
   3   3   9-4.23459 5.41420   3
   3  -3   9 0.28100 2.03420   1
   3   3  -9 2.60179 3.38113   4
  -3   3  -9 0.30287 2.19188   1
   3  -3  -9 6.61709 5.54568   3
   3   3   9 3.20384 4.05253   4
  -3  -3   9 2.91154 4.31877   1
   3  -3  -9-2.69483 4.94037   1
  -3  -3  -9-1.08867 3.23083   3
   3  -3   9 2.00910 2.62877   4
   3   3   9 2.21511 4.42470   1
  -3   3  -9 0.17182 3.76099   2
   3  -3  -9-0.16254 3.14975   2
   3   3   9 3.01240 5.42658   2
   3  -3  -9 1.00648 3.51941   4
  -3   3  -9 8.98546 5.90991   4
   3   3  -9-3.83249 4.48391   2
  -3   3  -9 3.56242 3.46905   3
   3   3  -9-1.23934 2.49105   3
  -3   3   9 4.23796 5.66637   1
  -3  -3  -9 3.98249 5.24367   2
  -3  -3   9 1.07133 2.17518   3
   3   3  -9-8.63324 6.03439   4
  -3  -3   9 10.2138 5.37093   2
   3   3  -9 2.06608 4.08042   1
   3  -3  -9 6.64477 5.01021   2
   3  -3 -10 51.6162 13.0311   1
  -3   3 -10 72.6191 12.2538   4
  -3   3 -10 66.8595 12.5233   2
  -3   3  10 71.9768 14.4804   1
   3   3  10 39.6799 10.4468   4
   3   3  10 57.6713 11.0743   1
  -3   3 -10 86.5665 12.6626   3
  -3  -3  10 95.1335 13.8995   1
   3  -3 -10 57.9650 11.2595   2
  -3  -3  10 86.5527 13.5498   3
  -3  -3 -10 79.8363 13.8545   3
   3  -3 -10 70.9897 13.7350   3
  -3  -3 -10 72.4862 11.6116   1
  -3  -3  10 56.2400 11.9957   2
  -3   3  10 77.2249 13.7960   4
  -3   3 -10 73.1096 9.97507   1
   3  -3  10 80.8906 11.3984   3
  -3   3 -10 80.6658 14.1055   2
  -3  -3 -10 71.0975 13.9043   4
  -3   3  10 62.0883 12.5366   3
  -3  -3 -10 46.0929 10.7029   2
   3   3 -10 62.3759 11.5203   1
   3  -3 -10 53.9961 11.4458   4
   3  -3 -10 79.8805 12.8723   2
   3   3 -10 73.6103 12.3939   4
   3   3 -10 62.4450 12.4698   2
   3   3  10 60.2067 12.3324   2
   3   3 -10 70.0241 12.5777   4
   3   3 -10 70.0669 11.3057   3
   3   3  10 82.0945 15.7359   3
   3  -3  10 65.4517 8.92260   1
   3   3  11 4.87801 7.04991   3
  -3   3 -11-1.36931 3.09139   4
  -3  -3 -11 7.64906 5.80355   1
  -3  -3  11 2.08539 4.66478   3
  -3   3  11 7.96188 6.92310   3
   3   3 -11-6.81078 6.01305   4
   3   3 -11-0.20061 4.27614   4
   3   3 -11 3.28691 4.91309   1
  -3   3  11 2.23549 5.04978   1
   3  -3 -11-0.19491 4.17138   2
  -3  -3  11 3.37995 4.70904   1
   3   3 -11 0.21591 3.91738   2
  -3   3 -11-0.21486 5.87813   2
   3  -3  11 6.06703 5.71477   3
   3  -3 -11 6.26670 4.57248   3
  -3  -3 -11 0.89911 3.83211   4
   3  -3 -11 6.83538 5.85080   2
  -3   3 -11 8.20553 4.72413   3
  -3  -3 -11-6.54734 6.43742   3
   3  -3 -11-4.16108 4.46431   4
   3   3  11-1.14107 4.32311   1
  -3   3 -11-0.94010 2.68737   1
   3  -3 -11 9.93601 7.42002   1
  -3  -3 -11 3.15259 7.56145   2
   3   3  11 2.83781 5.61179   4
  -3   3 -11-2.18017 4.33462   2
   3   3 -11-1.35673 3.82728   3
  -3  -3  11 8.36981 7.43661   2
  -3   3  11-0.19972 3.93991   4
   3  -3  11 1.83239 2.62473   1
   3   3  11 0.86832 4.04045   2
  -3   3  12 421.159 35.9080   1
  -3  -3 -12 399.430 33.4245   4
   3   3 -12 354.515 29.5662   4
   3   3 -12 460.807 33.2810   3
  -3   3  12 408.329 31.6329   4
   3  -3 -12 450.487 37.4625   3
   3   3  12 396.959 34.9236   4
  -3   3 -12 296.513 29.2545   2
  -3  -3  12 288.816 26.7974   3
   3  -3 -12 377.960 31.8782   4
  -3   3 -12 374.643 30.8667   4
   3   3  12 312.875 29.2763   2
  -3  -3 -12 379.910 28.1521   1
   3   3  12 369.782 29.2695   1
   3   3 -12 360.762 30.3642   4
   3  -3 -12 431.992 36.3167   1
   3  -3 -12 361.298 30.6354   2
  -3   3 -12 368.169 24.8860   1
  -3  -3 -12 355.321 31.0495   3
  -3  -3 -12 309.315 28.7585   2
   3  -3 -12 390.499 30.9400   2
   3   3 -12 360.999 28.9744   1
   3  -3  12 334.753 26.1688   3
   3   3 -12 392.887 32.7842   2
  -3   3 -12 364.815 31.7672   2
  -3  -3  12 369.586 31.8762   2
  -3   3 -12 420.146 30.5219   3
   3  -3  12 385.877 24.7116   1
   3   3  12 457.994 36.9402   3
  -3  -3  12 373.847 29.9340   1
  -3   3  12 378.012 33.3785   3
  -3   3 -12 321.700 28.8480   4
  -3   3 -13-2.15447 5.08708   4
   3   3  13 5.51750 7.17319   3
   3  -3 -13 4.53286 6.78426   3
   3  -3  13 5.38692 5.59648   1
  -3   3 -13 6.73041 8.38710   2
   3  -3 -13 5.87062 9.50609   1
   3   3 -13 3.91464 6.45813   2
   3   3 -13 4.86747 5.40103   1
  -3   3  13 11.3797 6.99317   4
  -3  -3 -13 0.51875 4.44977   3
  -3   3 -13 8.59780 5.94036   1
   3  -3  13 1.80190 4.86140   3
   3   3 -13-0.26059 5.06580   2
   3   3  13 10.5683 9.26461   4
   3   3 -13 1.41241 4.23596   3
   3  -3 -13 0.70513 4.08012   2
   3  -3 -13 30.1261 9.57097   2
  -3  -3 -13 4.23376 6.02607   4
  -3   3 -13-0.26779 7.79018   2
  -3  -3 -13 4.89809 6.76235   1
  -3  -3  13 4.95533 7.10594   1
  -3   3  13 0.55230 4.84495   3
   3   3  13 9.27064 6.98184   1
   3   3  13 1.30619 5.15859   2
  -3   3 -13-0.72395 4.89257   4
  -3  -3  13 13.7167 7.48545   3
  -3   3  13 6.03157 9.88381   1
   3   3 -13-3.40071 4.47538   4
   3   3 -13 6.32616 8.22487   4
  -3  -3 -13 1.49490 5.37909   2
  -3   3 -13 3.32661 6.14112   3
   3  -3 -13 0.50432 5.46619   4
   3   3 -14 3316.95 104.502   2
  -3   3  14 3090.24 102.980   3
   3   3  14 3502.89 109.940   4
  -3  -3 -14 3017.62 99.5818   4
  -3  -3 -14 3441.08 105.418   3
   3  -3  14 2938.82 86.5023   3
  -3   3 -14 2918.89 79.6933   1
  -3   3  14 3343.01 99.9070   4
  -3  -3 -14 3307.50 100.672   2
   3   3  14 3105.16 105.249   3
   3  -3 -14 2675.39 88.0373   2
  -3  -3  14 3108.50 94.9146   1
  -3  -3 -14 3263.26 102.614   2
  -3   3 -14 2775.01 92.0665   4
   3   3  14 3405.64 95.4557   1
  -3  -3  14 3288.00 97.0348   3
  -3   3 -14 3280.97 104.270   2
   3   3 -14 3127.41 100.976   2
   3  -3 -14 3575.91 110.035   1
  -3  -3 -14 3210.55 88.5427   1
  -3   3 -14 3323.64 103.385   2
   3  -3  14 3203.72 79.0787   1
   3  -3 -14 3325.87 100.472   2
   3   3 -14 2955.50 93.5863   3
   3  -3 -14 3437.76 109.109   3
   3   3 -14 3446.09 100.658   4
   3   3 -14 3395.56 102.463   4
  -3   3 -14 3342.41 99.9869   4
   3  -3 -14 3386.57 103.602   4
  -3   3  14 3492.55 110.992   1
  -3   3 -14 3089.98 90.5042   3
   3  -3 -15 33.9108 14.3719   3
  -3  -3  15 2.18129 5.93088   3
  -3   3 -15 6.65810 7.55936   4
  -3  -3 -15-0.30774 6.13953   4
   3  -3 -15 6.07080 10.2134   1
   3   3 -15 7.42171 9.56498   2
  -3  -3 -15 14.2787 10.4383   2
   3  -3  15 4.16136 5.79708   1
  -3   3 -15 10.0970 8.07471   2
  -3   3 -15 0.28626 6.61902   4
   3   3 -15 0.30487 6.97855   2
   3  -3 -15-1.42846 5.42290   2
   3   3 -15 11.4752 9.82133   1
  -3  -3 -15 23.6702 9.18218   1
   3   3 -15 0.27772 6.12057   4
   3   3 -15 3.89299 6.04192   3
   3  -3 -15 5.99053 7.06768   4
   3  -3  15 4.61444 5.84095   3
  -3   3  15 5.12391 9.32909   4
   3   3  15-0.50281 5.77455   1
   3   3  15 2.03538 8.52648   3
  -3  -3 -15 15.3709 11.2450   2
  -3   3  15 2.89228 7.49183   3
  -3  -3  15 14.3640 8.70672   1
   3   3  15 18.4854 11.1845   4
  -3   3 -15 14.5365 10.7968   2
   3   3 -15 5.50821 8.74461   4
   3  -3 -15 2.74490 7.10906   2
  -3   3 -15 14.0839 9.14760   3
  -3  -3 -15 9.39089 9.94758   3
  -3   3  15 16.3239 10.8198   1
  -3   3 -15 5.13563 6.24763   1
   3   3  16 2186.35 83.0877   1
  -3   3 -16 2166.19 91.7519   2
   3  -3 -16 2272.42 87.5581   2
   3  -3 -16 2194.49 92.5753   1
  -3  -3 -16 2360.37 94.1799   4
  -3   3  16 1848.96 82.7899   4
   3  -3  16 2108.16 71.0652   1
   3   3  16 1956.16 89.8774   3
   3  -3 -16 2262.20 88.7306   2
  -3   3 -16 1825.17 76.6732   3
  -3   3  16 2092.19 90.7228   1
  -3  -3 -16 2180.61 89.1023   2
   3  -3 -16 2116.36 93.8682   3
  -3  -3  16 2101.98 84.1588   3
   3   3 -16 2165.30 91.4496   2
   3   3 -16 2454.04 96.7891   2
   3  -3  16 2097.72 80.4815   3
  -3   3 -16 2133.11 89.9715   2
   3   3 -16 2080.01 87.0707   4
   3   3 -16 2310.54 89.7656   4
  -3  -3 -16 2281.04 92.4620   2
  -3  -3  16 2365.50 87.6482   1
  -3   3 -16 2130.86 87.1520   4
  -3  -3 -16 2224.30 78.8705   1
  -3  -3 -16 2314.71 92.5407   3
   3   3  16 2312.94 95.6350   4
   3   3 -16 2051.95 82.3293   1
   3  -3 -16 2280.73 91.2936   4
  -3   3 -16 2299.76 76.6924   1
   3   3 -16 2084.75 84.8422   3
  -3   3  16 2475.82 97.8401   3
  -3   3 -16 2197.68 89.1637   4
  -3  -3 -17 5.04326 10.7519   2
   3  -3 -17 18.1485 12.3048   2
   3   3  17-1.15255 11.4828   3
  -3   3 -17 8.56921 11.1214   4
  -3   3 -17 2.45751 9.83613   2
   3   3 -17 11.0987 13.4604   2
  -3   3 -17 7.35434 9.28459   3
   3   3 -17 6.59383 11.5690   4
   3  -3  17 8.42711 9.75026   3
  -3  -3 -17 28.8233 14.4452   2
   3  -3 -17 2.53452 11.5092   1
   3   3  17-0.28973 7.47909   1
   3   3 -17 11.9614 13.7004   2
   3  -3  17-1.36291 5.37530   1
   3  -3 -17 3.93513 9.47731   4
  -3   3  17-7.38505 10.2358   3
  -3  -3  17 0.30821 7.13438   1
  -3  -3 -17 10.2258 10.2247   1
  -3  -3 -17 30.9265 16.2765   3
  -3  -3 -17 18.3530 13.8560   4
  -3   3  17-2.94565 7.48237   1
   3   3  17 2.26486 7.72525   4
  -3   3 -17 16.9937 14.7364   4
   3   3 -17-0.92206 8.34839   1
  -3   3 -17 15.2588 9.69275   1
   3  -3 -17 23.5179 14.5741   4
   3   3 -17 2.29349 9.97805   3
   3  -3 -17 25.7958 14.7494   3
  -3  -3  17 10.9265 11.6300   3
   3   3 -17 19.8783 13.6180   4
  -3   3 -17 2.56707 7.71954   2
   3  -3 -17 22.3291 12.4118   2
   3   3 -18 106.655 22.2409   1
   3  -3 -18 88.9956 22.6199   1
  -3   3 -18 95.9924 22.0364   3
  -3  -3 -18 55.0517 17.4019   2
   3   3 -18 120.226 25.9806   2
  -3  -3 -18 91.2756 22.8002   4
   3   3 -18 94.5908 23.0059   4
  -3   3  18 50.7278 17.3585   1
  -3   3  18 90.1652 23.2925   3
  -3   3 -18 87.7223 21.4870   4
  -3   3 -18 77.0477 16.9993   1
  -3   3 -18 79.5147 22.4234   2
  -3  -3 -18 127.844 25.0193   2
   3  -3 -18 91.1885 20.3115   2
  -3   3 -18 90.3311 22.7035   2
   3  -3  18 54.8968 16.4647   3
   3  -3 -18 98.9102 21.2949   2
   3  -3 -18 58.4483 18.0435   4
  -3  -3 -18 71.4838 16.5568   1
   3   3  18 46.4651 14.3444   1
   3   3 -18 74.2364 20.0161   4
  -3  -3 -18 88.9899 22.3531   3
   3   3 -18 100.731 23.3596   2
   3  -3 -18 95.6524 24.2770   3
   3   3  18 47.3601 17.0061   4
  -3  -3  18 74.4580 18.5637   3
   3   3 -18 78.0659 20.6575   3
   3   3  18 68.1736 20.9213   3
   3  -3  18 81.8262 16.4571   1
  -3   3 -18 65.1642 19.7332   4
  -3  -3  18 111.717 21.1923   1
   3  -3 -18 86.1728 20.7082   4
   3  -3  19 4.48059 13.4345   3
   3  -3  19 11.4288 11.9964   1
  -3   3 -19 20.0623 17.1989   4
  -3  -3 -19 21.4216 12.4132   1
   3   3 -19 12.2643 15.7139   2
  -3   3  19 0.85429 10.7281   3
   3  -3 -19 30.0944 16.7296   1
   3  -3 -19 3.62136 11.1836   2
  -3  -3 -19 15.7536 13.0716   2
   3   3  19 4.27820 11.9337   4
  -3  -3  19 18.8850 13.1824   1
  -3   3  19 6.63531 13.4948   1
   3   3 -19 8.61642 10.7534   1
   3  -3 -19 1.61839 11.3503   4
  -3   3 -19 11.3155 14.7550   4
  -3   3 -19 12.4732 13.0174   2
   3   3  19 33.5219 17.5656   3
   3   3 -19-0.39011 9.73877   3
   3  -3 -19 16.4613 12.2441   2
  -3  -3 -19 14.9038 15.0196   4
   3  -3 -19 4.03426 11.3934   4
   3   3 -19 4.17594 10.6949   2
   3   3 -19 11.3230 15.1792   4
   3   3 -19 6.84560 13.0174   4
   3  -3 -19 3.45656 13.4569   3
  -3   3 -19 3.65926 12.2084   3
   3   3  19 2.65896 10.5323   1
  -3  -3 -19 10.2405 12.7023   3
  -3   3 -19 21.4485 13.0695   1
  -3  -3 -19 0.40062 11.4649   2
  -3   3 -19 33.7833 16.3569   2
   3   3 -20 19.0360 16.9785   3
   3  -3 -20 12.7562 14.8168   1
  -3  -3 -20 3.00228 11.5045   4
   3  -3  20 4.14138 11.5079   1
   3  -3 -20 8.43384 12.6180   2
  -3  -3 -20 9.90728 12.0207   2
   3   3  20 25.2098 15.5355   1
   3  -3 -20 8.36178 16.8013   2
  -3  -3 -20 0.41056 11.1484   2
  -3   3 -20 1.18587 12.0532   3
  -3   3 -20 13.6419 14.0214   2
   3  -3 -20-0.43076 10.8423   4
  -3  -3 -20 1.66459 12.5667   3
   3   3  20 19.7725 17.8186   3
   3  -3 -20 29.2382 18.8902   4
   3   3 -20 20.5026 16.9165   2
  -3   3  20 17.8865 15.9582   3
  -3   3 -20 11.3223 13.1993   4
   3   3 -20 45.5816 19.1941   4
   3  -3  20 34.8422 17.1238   3
   3   3 -20 21.5011 15.3889   3
  -3   3 -20 21.9568 17.8047   4
  -3   3 -20 7.75887 15.3077   2
   3  -3 -20 5.97042 16.3274   3
  -3   3  20 4.41048 15.0439   1
   3   3 -20 4.66417 12.7395   1
  -3  -3  20 34.2263 17.3798   1
  -3  -3 -20 8.96339 12.0412   1
   3   3 -20 6.96530 15.8861   4
   3   3  20 6.35274 14.6291   4
   3   3 -20 8.47136 13.7246   2
   3   3 -21 26.8077 17.7322   4
   3  -3 -21 13.8174 17.9907   1
  -3   3  21-0.97831 14.1449   3
   3   3  21 22.8447 17.2181   1
  -3   3 -21 14.0004 16.7214   3
  -3   3 -21 2.29878 15.6690   4
   3   3 -21 16.2072 18.3120   2
  -3  -3  21 0.82878 14.0408   1
   3   3 -21 22.6416 18.9187   3
   3   3 -21 66.4338 22.6062   3
   3  -3 -21 4.10784 13.5660   2
  -3   3 -21 11.0415 15.2576   1
  -3   3 -21 4.95945 15.9155   2
  -3  -3 -21 10.9058 15.3576   2
   3  -3  21 7.69219 11.5544   1
  -3  -3 -21-0.97548 10.7290   1
   3  -3 -21 1.28003 13.3798   2
  -3   3  21 39.1338 23.0087   1
  -3  -3 -21 5.00190 13.2727   4
   3   3 -21 5.87878 15.3717   1
  -3   3 -21-0.96779 15.8944   2
   3  -3 -21 0.91445 12.3149   4
  -3   3 -21 20.9401 20.9895   4
   3  -3 -21-0.48663 12.8168   3
   3   3 -21 0.46764 15.8280   4
   3   3  21 22.9908 19.1461   4
  -3  -3 -21 0.45498 12.1645   2
   3  -3 -21 4.13609 16.0970   4
  -3  -3 -21 3.08609 13.3586   3
   3   3 -21 1.84526 12.5712   2
   3   3  21 12.8003 17.0498   3
   0  -4   0 720.670 21.8677   4
   0   4   0 777.011 23.7224   1
  -4   0   0 666.136 16.1731   1
  -4   0   0 738.547 22.0983   2
   0   4   0 803.463 18.4050   2
   4   0   0 699.220 18.5474   4
   4   0   0 770.662 13.8539   3
   0  -4   0 681.860 22.4401   1
  -4   0   0 735.613 17.5594   4
   4   0   0 649.814 21.2569   2
   0  -4   0 698.189 17.8875   2
   0  -4   0 706.393 23.2730   3
   0   4   0 756.799 22.1085   4
   0   4   0 624.121 21.4238   3
   4   0   0 788.211 13.8093   3
   0   4   1 443.528 14.0827   2
   0  -4   1 346.797 15.6682   3
   0  -4   1 423.335 17.6441   1
   4   0   1 461.523 18.1850   2
   0   4   1 396.100 17.9439   1
  -4   0  -1 444.465 17.5730   2
   0   4   1 446.794 19.1200   3
   4   0  -1 429.893 17.2998   2
   4   0   1 465.375 15.8296   4
  -4   0  -1 429.314 8.96431   3
   0  -4  -1 411.259 18.1153   1
   0  -4  -1 381.069 13.9652   2
   0  -4  -1 401.879 17.1040   4
  -4   0  -1 376.584 13.8373   4
   0  -4   1 484.669 17.5787   4
  -4   0   1 460.770 17.5471   2
   4   0   1 444.732 11.1530   1
  -4   0   1 464.806 16.0604   1
   0   4   1 378.531 16.3729   4
   4   0  -1 447.311 13.1441   3
   0   4  -1 446.717 14.2622   2
   0   4  -1 479.446 18.0130   3
   4   0  -1 424.961 12.4747   3
   0  -4   1 443.664 14.5036   2
  -4   0  -1 397.882 8.99422   1
   0   4  -1 342.578 14.6892   4
   4   0  -1 414.672 16.2642   1
   4   0  -1 386.277 13.7524   4
  -4   0   1 428.513 13.8307   4
   0   4  -1 462.501 18.1728   1
   0  -4  -1 371.400 17.7177   3
   0   4  -2 411.412 16.5257   4
   4   0  -2 495.467 19.8512   1
   0   4   2 420.895 19.8198   3
   0   4   2 394.774 17.5591   4
   0  -4   2 384.441 17.0351   1
   4   0  -2 419.665 15.3458   3
  -4   0   2 329.629 15.7923   1
   4   0   2 427.489 18.0239   2
  -4   0   2 404.042 16.8638   2
   0  -4  -2 431.320 20.0388   3
   0  -4   2 423.627 15.7073   2
  -4   0  -2 425.296 10.6069   3
  -4   0   2 401.418 14.7457   4
   0   4  -2 427.569 15.0480   2
   0  -4  -2 327.801 16.8191   4
   0  -4   2 399.712 16.3502   4
   0   4   2 418.595 19.3361   1
   0  -4  -2 431.338 19.5161   1
   0  -4  -2 450.178 16.1747   2
   4   0  -2 408.715 15.0452   4
  -4   0   2 404.794 14.4697   3
   0   4   2 396.653 14.6307   2
  -4   0  -2 446.721 16.0637   4
   4   0   2 464.555 17.7117   4
   0   4  -2 365.865 16.4488   1
   4   0  -2 467.363 18.5630   2
   0  -4   2 421.311 17.0750   3
   0   4  -2 430.962 17.4853   3
  -4   0  -2 377.416 16.8558   2
   0  -4   3 181.018 11.5245   2
   0   4  -3 176.005 11.2862   4
   4   0  -3 187.377 13.5479   1
   4   0  -3 167.108 11.3589   3
   0  -4  -3 191.782 11.9478   2
   0  -4  -3 182.027 14.6419   3
  -4   0   3 183.662 11.0333   4
  -4   0   3 159.497 12.0296   1
   0  -4   3 176.139 11.6256   3
   0   4  -3 171.860 11.3286   3
  -4   0  -3 167.874 11.9844   2
  -4   0  -3 132.811 8.22479   3
   0   4   3 170.783 12.7573   4
   0  -4  -3 188.628 13.8001   4
   4   0  -3 154.958 11.4832   2
   0   4   3 168.990 13.2358   1
   0   4   3 176.398 10.9170   2
   0   4  -3 170.308 11.1039   2
  -4   0   3 152.722 10.5689   3
  -4   0   3 135.889 10.5988   2
  -4   0  -3 161.980 11.5216   4
   4   0   3 166.984 9.66970   3
   0  -4  -3 152.194 12.6895   1
   0   4  -3 182.479 12.2047   1
   4   0   3 159.342 12.0036   2
   0   4  -3 180.529 11.8244   1
   4   0  -3 151.849 10.2944   4
   0   4   3 192.768 14.4656   3
   0  -4   3 184.470 11.7060   4
   4   0   3 177.561 12.7326   4
  -4   0  -4 6116.68 65.8743   3
   4   0  -4 5646.49 80.9338   1
  -4   0  -4 5863.27 74.9718   4
   0   4  -4 5161.28 67.2457   4
   0  -4  -4 5201.24 68.7812   2
   0   4  -4 6487.79 74.4270   1
   0   4   4 5754.54 70.5708   2
  -4   0  -4 5628.57 73.5905   2
   0   4   4 5776.22 81.2031   4
   4   0   4 5620.19 78.9755   4
   0   4   4 5582.61 87.7820   3
   0  -4  -4 5228.44 79.2797   4
   4   0  -4 5870.91 70.1577   4
   0  -4  -4 5982.96 85.2085   1
   0   4  -4 5804.37 69.7346   2
   0   4   4 5250.00 82.4662   1
   4   0  -4 5525.95 71.9003   3
   0  -4  -4 5107.04 83.3631   3
  -4   0   4 5973.66 80.1700   1
   0   4  -4 6099.94 71.7488   3
   4   0  -4 5316.72 72.5429   2
   0  -4   4 5870.31 71.5458   4
   4   0   4 5615.46 63.1739   3
   0  -4   4 6005.40 74.5752   2
   0   4  -4 6428.04 71.8841   1
  -4   0   4 5583.50 71.7116   2
  -4   0  -5 0.29945 1.97045   4
   0  -4  -5 6.16348 3.39653   2
   0  -4   5 3.06152 1.67899   1
   4   0   5 12.2585 4.46085   2
  -4   0  -5 10.8375 2.32311   1
   0   4  -5 7.75668 3.34749   3
   4   0  -5 10.0021 4.08638   1
  -4   0   5 5.49268 3.13679   1
   4   0  -5 6.55623 3.43813   4
   4   0   5 4.19036 3.81853   4
  -4   0   5 2.82132 2.51819   2
   0   4   5 10.0621 4.58144   1
   0  -4   5-0.79455 1.78168   4
   0  -4  -5 0.13534 4.18541   3
   0  -4  -5 10.5463 4.31844   4
   4   0   5 6.65796 2.96918   3
   0   4   5 3.59219 2.47318   4
   0   4  -5 5.61649 2.85825   3
   0   4  -5 11.0655 3.81454   2
   4   0  -5 5.47152 3.33899   4
   4   0  -5 7.27553 3.36007   2
  -4   0  -5 7.58917 3.93852   2
   4   0  -5 4.05830 3.67231   3
   0   4   5 26.4019 7.66141   3
   0   4  -5 1.83238 1.68916   4
  -4   0   5 2.55772 1.90534   3
   0  -4  -5 11.1751 5.37723   1
   0   4  -5 10.8154 4.10078   1
   4   0   5 8.26033 1.90503   1
  -4   0  -5 2.15091 1.79445   3
   0  -4   5 4.76224 3.04322   2
   0   4   5 5.33446 2.56121   2
   4   0   6 14.3510 3.50615   3
   4   0  -6 25.8061 6.82026   4
  -4   0  -6 21.1318 3.97031   1
   4   0   6 14.5973 4.83937   2
   4   0  -6 51.0247 8.46139   2
   0   4   6 2.18902 4.54293   3
   4   0  -6 11.5016 4.65244   3
   0  -4  -6 23.1553 5.60033   2
  -4   0  -6 11.1390 4.53399   2
  -4   0   6 19.2986 5.78461   2
   4   0   6 23.1589 3.40098   1
   4   0  -6 25.0889 5.85850   4
  -4   0  -6 8.66991 3.53277   3
   4   0   6 36.5192 8.04456   4
   0  -4   6 14.4186 4.03766   1
   0   4  -6 11.6851 3.42560   3
  -4   0  -6 2.85365 3.32963   4
   0  -4  -6 12.9640 5.40677   3
   4   0  -6 26.5412 6.21040   1
   0  -4   6 17.1749 5.60893   2
   0   4   6 19.4349 5.62427   2
   0   4   6 14.1428 5.49358   1
   0   4  -6 16.6197 4.83721   3
  -4   0   6 32.6384 7.14457   1
   0  -4  -6 30.0993 7.17505   4
   0   4  -6 12.5926 4.79719   2
  -4   0   6 23.6988 5.85495   3
   0   4  -6 21.3156 5.32642   4
   0   4  -6 18.0457 4.55186   1
   0   4  -6 16.6411 5.19542   4
   0  -4  -6 22.3761 5.61359   1
   0   4   6 27.5846 7.16776   4
   0  -4  -7 268.082 21.8270   1
   0   4  -7 266.335 18.5242   3
   4   0   7 272.225 19.0353   3
   4   0  -7 225.073 18.5847   3
   0   4  -7 276.498 19.1436   3
   0   4   7 214.094 19.6155   4
   4   0  -7 266.426 19.2486   4
   4   0  -7 211.505 19.0229   1
   4   0  -7 229.249 18.4873   4
  -4   0  -7 309.561 22.0494   2
   0  -4   7 269.286 20.7596   2
   4   0   7 250.370 12.7945   1
  -4   0  -7 246.428 13.9345   1
   0   4  -7 259.282 19.1558   4
   0  -4   7 257.235 16.9879   1
   0   4   7 285.522 20.4101   2
  -4   0  -7 283.724 21.4234   4
   0  -4  -7 300.150 23.0210   4
   0  -4  -7 243.456 18.8964   2
   0   4   7 301.442 24.5564   1
   4   0   7 245.182 20.6750   2
   4   0   7 310.710 22.5875   4
   0   4  -7 242.855 18.7834   4
   0  -4  -7 252.854 22.6988   3
   0   4  -7 268.804 17.4333   1
   0   4   7 230.046 21.6491   3
   0   4  -7 259.715 19.7814   2
  -4   0   7 300.753 21.8396   1
  -4   0   7 227.104 18.2095   2
  -4   0   7 293.390 20.9874   3
   4   0  -7 255.738 20.0390   2
  -4   0  -7 242.451 18.0109   3
   0   4   8 1258.20 52.7356   3
   0  -4   8 1112.20 37.5802   1
   0   4   8 982.462 43.8761   4
   4   0  -8 1252.85 45.2197   4
   0   4  -8 1305.95 40.5298   1
   0  -4  -8 1212.30 50.5322   3
   4   0  -8 1255.09 47.8288   1
   0   4  -8 1138.77 41.0124   3
   4   0   8 1167.74 41.9788   3
  -4   0   8 1267.03 47.3656   1
   4   0  -8 1200.20 45.8139   2
   0   4  -8 1235.59 44.2902   4
   0   4  -8 1102.83 43.1918   2
   0   4   8 1222.82 45.4302   2
   0  -4   8 1271.14 47.3742   2
  -4   0  -8 1272.92 48.2552   4
   4   0   8 1264.55 48.3264   4
   0   4  -8 1268.23 43.3672   3
   4   0  -8 920.998 38.2606   4
   0   4  -8 1270.70 44.1230   4
  -4   0   8 1139.09 43.1290   2
   4   0   8 1253.79 49.0165   2
   4   0  -8 1014.92 41.7361   3
  -4   0  -8 1162.21 44.9759   2
  -4   0  -8 1158.84 33.9385   1
   0  -4  -8 1238.24 48.5705   4
   0  -4  -8 1168.31 47.0661   1
  -4   0  -8 1177.80 41.6476   3
   0  -4  -8 1001.72 40.4042   2
  -4   0   8 1209.37 44.4831   3
   4   0   8 1223.45 31.2168   1
   0   4   8 1178.04 49.4193   1
   0   4  -9 119.890 14.9071   4
   0   4   9 136.711 18.8257   3
   0   4   9 110.841 15.6151   4
   4   0   9 100.184 14.5634   2
   0   4  -9 111.711 14.0989   4
  -4   0   9 95.9216 14.2283   1
   0  -4  -9 100.204 13.7949   2
  -4   0  -9 104.560 14.9769   2
   0  -4   9 105.556 12.3883   1
   4   0  -9 128.757 16.4022   2
  -4   0   9 103.557 14.2995   3
   0   4   9 90.8014 15.4300   1
   4   0   9 109.901 10.5074   1
  -4   0  -9 118.012 15.7518   4
   0  -4  -9 110.940 15.3674   1
   0   4   9 103.706 14.2450   2
   4   0  -9 103.264 14.8725   1
   0   4  -9 121.831 14.0971   3
   4   0  -9 119.799 14.6403   4
   0  -4  -9 91.5606 15.1564   3
   0   4  -9 112.192 15.0892   2
   4   0   9 123.129 14.7027   3
   0   4  -9 105.255 14.9053   2
  -4   0  -9 130.471 14.6890   3
   0   4  -9 119.636 14.5874   3
   0  -4  -9 92.7895 15.6117   4
  -4   0  -9 125.525 12.4333   1
  -4   0   9 90.2606 13.2506   2
   0   4  -9 98.3431 12.3611   1
   4   0   9 124.815 16.3101   4
   4   0  -9 104.314 13.4958   4
   4   0  -9 86.9101 12.9201   3
   0   4  10 2269.02 77.5215   3
   4   0 -10 2288.00 68.9930   4
   0   4  10 2205.63 74.9398   1
   0  -4 -10 1506.69 56.2455   2
  -4   0 -10 2184.07 64.8566   3
   0   4  10 2240.05 71.5491   4
  -4   0 -10 2011.00 66.2347   2
  -4   0 -10 2105.05 52.9583   1
   4   0  10 2087.45 48.9566   1
   0   4 -10 2068.76 63.3222   3
   0  -4 -10 2090.61 72.9394   3
  -4   0  10 2108.45 66.4831   3
  -4   0  10 2143.38 66.4989   2
   0  -4  10 1993.87 56.6011   1
   0   4 -10 2087.67 65.1218   4
   0   4 -10 2000.23 56.8529   1
   4   0  10 2037.54 68.4010   4
   0  -4 -10 1914.28 66.8401   4
  -4   0  10 2317.52 70.8431   1
   4   0 -10 2166.32 68.9920   2
  -4   0 -10 1854.39 64.3340   4
   4   0 -10 2081.19 66.2315   3
   0  -4 -10 2030.25 65.4640   2
   0  -4 -10 2045.42 67.6624   1
   0   4 -10 2039.74 66.5303   2
   4   0  10 2062.85 69.7661   2
   0   4 -10 2211.56 71.0524   2
   0   4 -10 2132.37 64.2750   4
   4   0 -10 1933.49 65.3554   1
   4   0 -10 2046.21 63.5677   4
   4   0  10 2155.56 64.4700   3
  -4   0  11 53.6575 11.5558   2
  -4   0 -11 73.3732 10.8854   1
  -4   0  11 75.0195 13.9318   1
   0   4 -11 80.2580 14.4599   4
   0  -4 -11 51.0331 12.0753   2
   4   0  11 70.6651 12.8044   3
   0  -4  11 70.0985 11.5372   1
   0   4 -11 65.1562 12.7832   2
   0   4  11 86.4572 15.8457   1
   4   0  11 67.1248 14.3481   4
   4   0 -11 76.3462 14.1027   3
   0  -4 -11 63.5953 13.8148   3
   4   0  11 69.9469 10.2035   1
   0   4 -11 103.813 16.1121   2
   0  -4  11 108.157 15.1378   3
  -4   0 -11 60.8672 13.4258   2
   0   4 -11 86.5564 13.4780   1
   4   0 -11 95.9057 16.6472   2
   0   4  11 89.1217 18.8119   3
   4   0 -11 72.4161 13.0324   4
   4   0 -11 66.4915 12.0086   4
   0  -4 -11 76.1699 14.4070   4
  -4   0  11 50.2055 11.4977   3
   0  -4 -11 77.5751 14.5414   2
   4   0 -11 86.6566 15.2018   1
  -4   0 -11 56.7968 12.9959   4
   0   4 -11 73.9133 13.6505   4
   0   4  11 78.7431 14.7975   4
   0   4 -11 49.9251 11.4797   3
  -4   0 -11 87.9881 14.9395   3
   4   0  11 85.2084 15.7646   2
   0  -4 -11 74.8520 14.4873   1
   0  -4 -12 1625.90 65.6830   1
   4   0 -12 1673.21 66.1039   1
  -4   0  12 1579.65 63.9675   1
   4   0  12 1663.94 68.1520   4
   0   4 -12 1357.22 58.1788   4
   0   4  12 1634.20 67.5550   4
   0   4  12 1797.39 75.4116   3
   4   0 -12 1744.50 65.2705   4
   0   4 -12 1687.54 68.7589   2
  -4   0 -12 1747.54 64.5459   3
  -4   0 -12 1674.74 53.5143   1
   0   4  12 1796.59 72.9888   1
  -4   0 -12 1795.41 69.9265   4
   4   0  12 1426.17 46.6637   1
   4   0 -12 1773.40 67.7102   3
   4   0  12 1601.43 62.2071   3
   4   0 -12 1515.28 63.2345   4
   0  -4 -12 1587.92 69.3292   3
   0   4 -12 1735.30 67.4993   2
   0  -4 -12 1757.13 65.5425   2
   4   0 -12 1502.16 63.3636   2
   0  -4  12 1602.16 60.3362   3
   0   4 -12 1481.85 59.8974   4
   0  -4 -12 1747.64 70.1715   4
   4   0 -12 1790.44 68.9970   2
   0   4 -12 1499.69 55.0958   1
   0   4 -12 1490.30 58.7154   3
   0  -4 -12 1476.59 61.9961   2
  -4   0 -12 1590.93 65.3993   2
  -4   0  12 1399.59 59.8390   3
   0  -4  12 1586.88 55.8835   1
   0   4  13 15.0938 7.93826   1
   0   4 -13 2.13610 6.99680   4
   0   4 -13 5.27976 7.56892   4
   0  -4 -13 7.61651 7.16493   3
  -4   0 -13 16.3617 8.84403   4
  -4   0 -13 12.7149 8.14814   2
   4   0  13-0.90487 4.42428   3
   0   4  13 4.76646 7.06463   3
   0   4 -13 20.0811 9.42676   3
   4   0 -13 13.5569 8.00536   3
   0  -4 -13 9.57272 6.75653   2
   4   0  13 17.8905 7.12506   1
   4   0 -13 10.8037 8.13429   2
  -4   0 -13 5.41029 5.80419   2
   0  -4  13 3.89032 5.83255   3
   0   4 -13 8.45969 6.29855   1
   4   0 -13-1.47213 5.60719   1
   0  -4 -13 12.1489 6.43394   1
  -4   0 -13 11.4871 8.48684   3
   4   0  13 10.8454 7.68523   4
   4   0 -13 6.71940 6.28094   4
  -4   0  13 13.0882 8.09573   1
  -4   0  13 4.08958 6.83020   3
   0   4 -13 21.8633 12.4488   2
   0   4  13 20.5694 9.47346   4
   0  -4 -13 28.2928 14.6849   2
   4   0 -13-1.79266 5.28762   2
  -4   0 -13 24.9804 8.45205   1
   0   4 -13-3.56035 5.14696   2
   0  -4 -13 9.21323 8.12014   4
   4   0 -13 15.0547 8.86623   4
   0  -4  13 9.20650 5.68514   1
   0   4  14 93.2411 19.0771   1
   4   0  14 106.623 17.9344   3
   0   4  14 72.9375 17.8653   3
   4   0 -14 82.1486 18.2269   2
   0  -4 -14 100.661 18.7002   1
   0  -4 -14 106.904 18.0990   2
   0   4 -14 118.182 19.6623   2
  -4   0 -14 75.6576 15.6547   3
   0   4 -14 78.6005 16.1033   4
  -4   0 -14 87.3801 13.9993   1
  -4   0 -14 92.2751 18.3390   4
   0   4 -14 106.832 19.9943   2
  -4   0 -14 103.925 20.0331   2
  -4   0  14 94.1934 17.8673   3
   0  -4 -14 77.7085 17.0271   2
   0   4 -14 81.0158 17.6729   3
   4   0 -14 90.1518 18.5097   1
   0  -4 -14 127.130 22.3012   4
   4   0 -14 93.0439 17.8544   4
   0   4  14 78.2259 16.8994   4
   0  -4 -14 99.1404 19.8771   3
   4   0  14 92.4069 20.0214   4
  -4   0  14 74.9697 16.4735   1
   4   0  14 82.1785 12.8958   1
   0  -4  14 77.1506 15.1207   3
   0   4 -14 116.578 17.5187   1
   0  -4  14 108.437 16.5318   1
   4   0 -14 91.5584 18.4858   3
   4   0 -14 100.028 18.6988   2
  -4   0 -14 69.1739 15.7155   2
   0   4 -14 117.443 19.3443   4
   4   0 -14 73.4842 16.2765   4
   4   0 -15 260.395 29.5419   1
   0  -4 -15 221.424 27.6952   2
   4   0 -15 235.032 29.2051   2
   0   4 -15 261.997 29.6045   4
   0  -4 -15 213.686 27.3350   2
   0  -4 -15 229.469 30.5903   3
   0   4  15 219.172 28.7793   4
   4   0 -15 197.831 26.6533   4
   0   4 -15 294.431 28.7580   1
   0  -4 -15 214.783 27.2314   1
  -4   0  15 214.421 26.2304   1
   4   0 -15 184.482 26.7191   2
  -4   0 -15 241.936 31.0571   2
  -4   0 -15 191.998 20.9876   1
  -4   0  15 206.185 26.8774   3
   4   0  15 203.562 21.5715   1
   0   4 -15 204.109 26.2001   4
   0   4 -15 232.713 30.0308   2
   0   4 -15 230.729 27.4844   3
   4   0  15 254.466 30.1291   4
  -4   0 -15 193.147 26.2171   3
  -4   0 -15 254.461 31.3520   4
   4   0  15 189.001 25.3618   3
   0   4  15 237.005 29.8964   1
   4   0 -15 202.355 26.2469   4
   0  -4 -15 220.937 28.3426   4
   0  -4  15 231.394 25.2132   1
   0   4 -15 208.930 27.7844   2
   0  -4  15 232.373 27.2247   3
   0   4  15 231.590 30.9138   3
   4   0 -15 236.590 29.2952   3
  -4   0 -15 272.535 31.6923   2
   0   4 -16 255.418 30.3716   4
   0  -4  16 261.688 27.9159   1
   0   4  16 189.790 29.5653   3
   4   0 -16 244.836 31.1561   2
  -4   0 -16 232.530 30.5306   4
   0   4 -16 221.756 29.2508   2
  -4   0 -16 249.141 31.0851   2
   0  -4 -16 199.132 26.6324   2
   4   0  16 233.838 27.7023   3
  -4   0 -16 220.937 30.1550   2
  -4   0 -16 225.043 28.5904   3
   4   0 -16 202.043 27.7346   4
   4   0  16 202.498 28.5933   4
   0  -4 -16 240.225 31.9473   4
   4   0 -16 242.274 30.1614   1
   0   4  16 173.335 26.4452   4
   0  -4 -16 236.907 31.9982   3
   0   4 -16 197.058 26.6260   4
   0   4  16 217.747 29.5283   1
   4   0 -16 259.320 31.5925   3
   0  -4 -16 223.858 27.6766   2
  -4   0  16 237.273 30.2880   1
   0  -4  16 187.281 25.0517   3
   0   4 -16 231.543 30.2958   2
   0  -4 -16 259.450 30.9611   1
  -4   0  16 187.420 26.1809   3
   4   0  16 258.788 24.6008   1
   0   4 -16 245.415 28.2104   3
  -4   0 -16 239.407 25.0487   1
   4   0 -16 241.457 29.6925   4
   0   4 -16 195.567 24.3426   1
   4   0 -16 235.398 29.8979   2
   4   0  17 9.46410 13.5200   4
   0   4  17 17.7109 12.2210   3
   0   4 -17 28.2095 15.7938   2
   0  -4 -17 8.75044 8.61892   2
   0  -4 -17 4.58815 9.31736   4
   0  -4 -17-1.33563 8.49997   2
   4   0 -17 16.9202 13.0621   3
   0   4 -17 16.3391 14.0623   3
   0  -4 -17 22.5665 15.5003   3
  -4   0  17 3.74303 9.29297   1
   4   0  17 4.87170 10.0978   3
   0   4 -17 4.98609 9.49999   4
  -4   0 -17 26.4983 13.9815   4
   0  -4 -17 13.7633 10.6775   1
   0   4 -17 20.4639 13.5573   2
   4   0 -17 17.9865 12.2699   1
   4   0 -17 11.2683 11.5915   4
  -4   0  17-1.01957 7.56165   3
   0  -4  17-1.88233 5.42182   1
   4   0 -17 6.28410 8.35359   2
   0   4  17-1.75409 8.86174   4
  -4   0 -17 8.99788 11.7703   2
  -4   0 -17 7.06879 8.32258   1
   4   0 -17 4.85189 7.86805   4
   0   4 -17 2.00491 8.94312   4
   4   0  17 9.91535 8.28559   1
   4   0 -17 12.2332 12.2909   2
  -4   0 -17 13.9763 11.5919   3
   0   4 -17 12.0001 9.97107   1
  -4   0 -17 13.1503 10.7244   2
   0   4  17 7.45326 9.69385   1
   0   4 -18 1101.58 67.3466   4
   0   4 -18 1138.49 68.0266   3
   0   4  18 1109.69 70.9711   4
   0  -4 -18 924.437 63.7022   2
  -4   0 -18 1159.90 72.4697   2
   0   4  18 1088.33 72.8189   3
   4   0  18 1190.10 74.2776   4
   4   0  18 1081.67 55.4728   1
   0   4 -18 1081.56 69.6926   2
   0   4 -18 1086.26 70.8274   2
  -4   0 -18 1142.96 70.7195   4
   4   0 -18 1030.61 67.2715   2
   4   0 -18 973.626 66.0074   4
   0  -4 -18 1109.00 71.9069   3
   0  -4  18 1085.62 60.4117   1
  -4   0 -18 1084.53 68.3066   2
  -4   0 -18 1104.66 58.1744   1
   0  -4 -18 1059.78 64.9925   2
   0   4 -18 1012.55 65.2711   3
   4   0  18 1123.93 67.7975   3
   4   0 -18 1175.65 71.0629   1
   0   4 -18 1165.01 70.1292   4
   0   4 -18 866.316 55.6374   1
   4   0 -18 1239.61 72.9780   3
   0  -4 -18 1188.82 68.8878   1
   0  -4 -18 1142.77 71.1976   4
   0   4  18 1014.08 67.2701   1
  -4   0  18 1150.91 70.7818   3
  -4   0  18 1051.23 65.8642   1
   4   0 -18 1160.03 70.5392   2
  -4   0 -18 1036.92 64.7525   3
   4   0 -18 1194.51 71.5763   4
   4   0  19 28.5930 12.3554   1
   0   4  19 42.1454 18.6290   4
   4   0  19 45.6146 16.9121   3
   4   0  19 24.8363 15.9759   4
   0   4 -19 46.7500 18.0343   2
  -4   0  19 10.5638 11.9139   1
   4   0 -19 38.1723 16.8879   3
   0   4 -19 24.9086 13.8095   3
   4   0 -19 36.3869 17.9009   1
  -4   0 -19 40.2545 18.1741   2
   0   4 -19 43.7025 15.2009   1
   0   4 -19 49.4810 19.8515   3
   0  -4 -19 24.5348 16.0745   3
   4   0 -19 6.04885 9.81091   4
   0   4 -19 34.4442 17.5154   2
   0   4 -19 46.2529 16.1890   4
   0   4  19 46.7602 19.4103   1
  -4   0 -19 19.3529 15.7487   4
  -4   0 -19 27.3906 17.0897   2
   0  -4 -19 50.0282 18.4889   1
   4   0 -19 21.9363 14.5877   2
   0   4  19 23.0741 15.7994   3
  -4   0 -19 43.6785 16.2139   3
  -4   0 -19 40.7930 17.8886   1
   0  -4 -19 43.0544 16.9509   4
   0  -4 -19 17.7317 12.9384   2
   4   0 -19 35.4137 15.1963   4
   0  -4  19 16.0674 11.6285   1
  -4   0  19 15.0569 14.8979   3
   4   0 -19 42.1293 18.1480   2
   0   4 -19 31.4275 15.3091   4
   0  -4 -19 70.2884 20.7176   2
  -4   0 -20 515.044 49.1648   3
   0  -4 -20 426.948 46.4226   2
   4   0 -20 336.035 43.5412   2
   0  -4 -20 572.417 54.3631   4
   4   0  20 517.102 42.5956   1
   4   0 -20 466.456 48.7574   4
   0   4 -20 411.177 47.7994   2
   0   4  20 424.269 46.4066   4
   0   4 -20 436.308 47.9351   2
   4   0 -20 458.559 48.6634   2
   4   0 -20 524.421 51.7074   3
  -4   0  20 529.383 50.2023   1
   0   4 -20 437.452 46.1671   3
   4   0 -20 406.272 45.6971   4
  -4   0 -20 417.251 46.7151   2
   0  -4  20 349.416 38.5579   1
   0  -4 -20 471.431 46.5195   2
   0   4 -20 348.192 40.6938   3
  -4   0  20 549.394 51.6324   3
  -4   0 -20 459.532 40.5041   1
   4   0 -20 415.800 45.2984   1
   0   4  20 471.449 51.6431   3
   0   4  20 438.492 47.2848   1
   0  -4 -20 497.312 48.0733   1
   0   4 -20 471.564 50.2657   4
  -4   0 -20 389.994 46.2898   2
   4   0  20 375.174 44.4942   3
   0   4 -20 517.689 51.1043   4
  -4   0  21 21.1794 17.5586   1
   0   4 -21 52.5441 22.0835   2
   0   4  21 67.7123 23.9267   1
   0  -4 -21 43.5177 18.8191   1
  -4   0  21 32.0530 17.7106   3
  -4   0 -21 42.5668 21.5686   2
   0  -4 -21 20.6259 17.1928   2
   0   4 -21 48.9959 20.1540   3
   4   0  21 38.6777 19.7979   3
   0  -4 -21 47.9742 20.1348   4
   0   4 -21 35.1805 19.0194   1
  -4   0 -21 65.1568 22.9856   3
   4   0 -21 82.7028 25.7627   3
   4   0 -21 111.478 28.4206   2
  -4   0 -21 46.9514 21.2200   4
   4   0 -21 62.8190 25.7377   4
   0   4  21 61.6395 24.0926   4
   0   4 -21 43.6411 20.4189   2
   4   0  21 46.7882 17.7844   1
   4   0 -21 38.6124 19.6495   1
  -4   0 -21 28.5339 14.6721   1
   4   0 -21 15.6459 17.1969   4
   0  -4 -21 35.3084 18.0446   2
  -4   0 -21 55.8682 22.6575   2
  -4   0 -21 43.3617 20.8716   4
   0   4 -21 18.6562 15.4920   4
   0   4 -21 2.51688 11.9580   3
   0   4 -21 23.4112 18.9491   4
   4   0 -21 49.9320 21.9346   2
   0   4  21 61.4855 24.6522   3
   0  -4  21 66.7319 21.5977   1
   0  -4 -22 175.812 33.3726   1
   0  -4 -22 195.884 35.6956   3
   0   4 -22 190.982 36.3335   4
  -4   0 -22 237.130 40.1200   4
   0  -4 -22 179.037 31.2324   2
   0  -4 -22 295.687 42.8189   2
   4   0 -22 115.989 29.0556   4
  -4   0 -22 197.722 37.2740   2
   0   4 -22 160.757 33.0788   3
   4   0 -22 161.036 33.3078   2
   0   4 -22 216.103 36.1367   2
  -4   0 -22 180.350 27.8195   1
   4   0  22 76.0641 18.8871   1
   4   0  22 165.491 33.0954   3
   0   4 -22 315.215 46.0474   2
   0   4 -22 149.765 30.2012   4
   4   0 -22 196.252 35.1670   1
   0   4  22 178.797 36.3915   3
  -4   0  22 223.024 38.2777   1
  -4   0 -22 195.817 37.0209   4
   0   4  22 228.328 36.7502   1
   4   0 -22 134.749 30.2809   2
   0   4 -22 190.710 33.6618   1
  -4   0 -22 212.580 37.2522   3
   0  -4  22 189.271 29.8683   1
   4  -1   0 48.6169 4.09864   4
   1   4   0 36.3438 5.20078   3
   1   4   0 47.8993 5.43628   2
  -4  -1   0 41.2095 3.96842   1
   1   4   0 42.3607 5.79327   1
  -1   4   0 46.1969 5.99279   1
  -4   1   0 49.6798 3.75442   4
  -4   1   0 50.3512 5.20591   1
  -4  -1   0 46.8052 4.20927   3
  -1   4   0 37.0819 5.50905   3
  -4  -1   0 49.2143 5.65134   4
  -4   1   0 44.8218 5.24104   2
   1  -4   0 44.0441 4.97307   4
   4  -1   0 49.3230 5.87602   1
  -4  -1   0 58.9077 6.65577   2
   4  -1   0 43.7544 5.10194   2
  -1  -4   0 53.0581 6.15323   2
   4   1   0 48.0927 4.38687   1
   1   4   0 42.7500 5.67137   4
   4   1   0 48.0972 5.89228   4
   1  -4   0 47.9234 5.95146   3
   4   1   0 32.3975 5.38893   2
  -1  -4   0 44.8804 5.88324   4
  -1   4   0 51.3909 5.27054   4
  -1  -4   0 45.7559 6.18024   1
  -1  -4   0 53.6488 6.74120   3
   4   1   0 45.4131 4.40601   3
  -1   4   0 47.8828 3.56678   2
   1  -4   0 38.9405 3.41756   2
   1  -4   0 37.9259 5.72673   1
   4  -1  -1 7116.91 75.0089   1
  -1  -4  -1 7289.99 74.4752   1
   4  -1  -1 7966.76 57.7192   3
  -4  -1   1 7962.94 63.1460   1
  -4   1   1 8336.80 51.4653   4
  -4   1  -1 7802.04 67.2471   2
   4   1  -1 8497.25 72.8187   4
   4   1   1 8373.60 83.2334   2
  -1  -4   1 7708.28 75.7460   1
   1   4   1 8606.83 83.1328   4
  -4  -1  -1 8121.89 55.5386   3
  -1   4  -1 7793.49 75.1238   1
   1   4   1 8195.49 79.3557   1
  -1   4   1 8400.68 80.9096   3
  -4  -1  -1 8540.07 82.9957   2
  -4   1   1 8066.66 52.6886   3
   1   4  -1 8168.22 77.4029   1
   1  -4  -1 7654.84 68.6117   4
  -1  -4   1 7288.25 75.5486   3
   4  -1  -1 8362.25 53.4002   4
  -1  -4  -1 8612.46 84.5890   3
  -1   4   1 7874.53 68.6333   4
   1  -4  -1 8100.92 81.7876   1
  -1   4  -1 8298.95 73.0816   3
   4   1   1 7885.30 74.1893   4
  -4  -1   1 7617.87 69.1090   4
  -4   1  -1 8266.95 50.9147   4
   4  -1  -1 7845.08 68.2994   2
   4   1   1 7420.70 44.8386   1
   4   1   1 8234.46 59.3223   3
   1  -4   1 8595.65 78.3969   1
  -1   4   1 7620.12 46.8043   2
  -1   4  -1 7793.12 62.6308   4
   1   4  -1 7563.99 74.7459   4
   1  -4   1 7599.51 62.4377   4
   1   4  -1 7847.76 76.0582   3
   1  -4   1 7464.29 68.9369   3
   4  -1   1 8115.80 70.9743   2
   4   1   1 7650.56 46.2258   1
  -4   1   1 8333.70 66.6816   2
   1  -4   1 7973.87 51.3109   2
  -4  -1  -1 8059.38 71.8975   4
  -4  -1   1 8074.35 78.7936   2
  -1  -4  -1 7515.22 79.6361   4
   1   4   1 7681.67 80.8251   3
   4  -1   1 8118.85 54.1887   1
  -1   4  -1 7638.30 47.9199   2
   4  -1   1 7836.67 54.6055   4
  -1  -4   1 7529.49 69.8759   2
   4   1  -2 6.37721 3.13555   1
  -1   4   2 5.32862 1.96149   2
  -1   4  -2 4.23590 3.06308   1
   1   4  -2 0.32181 1.69332   4
  -1  -4  -2 9.08912 3.46577   2
   4  -1   2 4.82379 2.10179   2
   4  -1  -2 4.04704 1.70295   3
  -4   1  -2 6.40620 2.72854   2
   4  -1  -2 12.5885 2.84382   4
   1   4   2 6.63175 2.63236   2
   1  -4   2 7.36312 1.96177   2
   1  -4  -2 1.40841 2.82510   3
  -1  -4   2 4.41513 1.83384   1
   1   4  -2 5.77667 2.50877   3
  -1   4   2 2.97966 2.52913   4
   1  -4   2 5.39244 2.66717   1
  -1   4  -2 3.07791 0.82707   2
  -4  -1   2 3.84049 2.85413   2
  -1   4   2 9.62387 3.23151   3
  -1   4  -2 6.84159 2.36267   4
  -1  -4   2 3.33853 2.69441   2
   1   4  -2 7.96912 2.95062   2
   4   1   2 0.82782 0.68752   1
  -1   4   2 10.9741 3.76052   1
   4   1  -2 3.35000 1.93601   4
   1  -4  -2 5.20895 2.86637   4
  -4   1   2 2.90980 1.32811   2
   1  -4  -2 11.3737 2.51924   2
   4   1   2 6.04841 2.81663   2
  -4   1   2 8.25728 2.70357   3
   1  -4   2-0.70812 1.86271   3
   1   4  -2 4.04804 1.79677   1
  -4  -1  -2 6.15259 2.56108   4
   1   4   2 35.7819 7.54289   4
  -4  -1  -2 4.61999 1.99201   3
   4   1   2 3.67342 1.85954   3
   1   4   2 2.64035 1.64439   1
   4   1  -2 5.92554 2.36462   3
  -1   4  -2 0.38081 1.39290   3
  -1  -4   2 0.26313 2.33572   4
  -1  -4  -2 5.37751 2.87869   1
   4   1   2 9.27366 3.69314   4
  -1  -4  -2 20.1301 5.28621   3
   4  -1  -2 0.56326 2.58330   1
  -4   1   2 11.9970 2.67451   4
   4  -1   2 3.64849 1.76646   4
  -1  -4   2-0.45488 1.32815   3
   4   1  -2 4.96427 1.61245   3
  -4   1  -2 4.18595 1.81025   4
  -1  -4  -2 19.9295 5.28720   4
   1  -4  -2 8.18177 3.93438   1
   1   4   2 28.0618 7.39670   3
   4   1  -2 6.05743 2.91117   2
   4  -1  -2 5.58313 2.71518   2
   1  -4   2 3.01687 1.72435   4
  -4  -1  -2 4.75601 2.55870   2
  -4   1   2 2.98277 1.20048   1
  -4  -1   2 3.79929 1.95222   4
  -4  -1   2 3.03115 2.12550   1
   4   1  -3 4202.54 56.8903   4
  -1  -4   3 3991.36 57.9829   4
   4  -1  -3 4250.60 58.9066   3
  -1   4   3 4016.51 69.1062   1
   1  -4  -3 3903.39 68.2604   3
  -1  -4   3 4222.93 59.4028   3
   4   1  -3 4306.50 62.9751   2
  -1   4  -3 4274.43 52.6828   4
  -4   1  -3 4306.25 40.8443   3
  -1   4  -3 4229.88 53.6316   3
   4  -1  -3 4089.63 67.0081   1
  -1   4  -3 4314.28 50.5032   2
   1   4   3 4128.51 63.4164   1
  -1  -4  -3 4154.21 62.6489   1
   1  -4  -3 3922.46 68.1032   1
   4  -1  -3 4429.72 57.9067   2
   1  -4  -3 4314.84 64.3068   4
   1   4  -3 4306.82 60.1666   1
   1  -4   3 4153.30 54.2007   3
  -4  -1  -3 4269.07 49.8424   3
  -1   4   3 3943.19 59.3934   4
   4   1   3 4131.52 63.3126   4
   1   4  -3 3680.45 54.3338   1
   1  -4   3 3981.13 52.8271   2
  -4   1  -3 4123.64 51.9743   4
  -4   1   3 4300.20 66.5506   1
  -4   1  -3 4458.96 57.5301   2
   1   4  -3 4604.96 60.7061   3
   4  -1   3 4174.89 58.8935   2
  -4  -1  -3 4082.77 61.7156   2
  -1   4   3 4443.63 53.1279   2
  -1   4  -3 3915.54 54.8931   1
  -4  -1   3 4202.16 59.3833   1
   1   4   3 3989.06 64.0462   4
   1  -4  -3 3813.92 49.3663   2
   1  -4   3 4254.91 53.1172   4
  -1  -4  -3 3986.21 65.6081   4
  -4   1   3 4162.11 54.8446   2
  -1  -4   3 4438.24 60.1142   2
   4  -1   3 4057.28 54.6296   4
  -4  -1   3 4228.32 61.8959   2
  -4  -1  -3 4403.80 61.0715   4
   4  -1  -3 4280.20 50.7651   4
   1   4  -3 4203.04 56.9946   2
   1   4  -3 4252.45 59.4697   4
   1  -4   3 4106.69 54.7705   1
  -4   1   3 4040.78 53.9513   3
   4  -1  -3 4161.35 50.7768   4
   1   4   3 4660.76 59.7567   2
  -1   4  -4 31.6662 5.00714   2
  -1  -4  -4 35.2162 7.14246   4
  -4   1  -4 29.9288 5.32118   4
   1  -4   4 31.3750 6.10065   2
  -4   1   4 42.1486 6.58511   2
   4   1  -4 37.6981 6.59167   1
  -1  -4   4 28.3273 5.99731   2
  -4  -1   4 32.4225 5.30493   3
  -1   4  -4 36.9434 5.76816   3
   1   4   4 29.7737 5.14056   2
  -1   4  -4 35.0717 5.76358   1
   4   1   4 34.5026 6.59367   4
   1  -4   4 44.8374 6.39848   4
  -4   1  -4 31.5822 4.71460   3
  -1  -4   4 41.6435 6.18266   3
  -1  -4  -4 30.2937 5.56939   1
  -4   1  -4 29.5130 2.62402   1
   1  -4  -4 21.4138 6.07437   3
   1   4   4 32.6546 6.86710   3
  -4  -1  -4 23.1699 5.07723   4
   4   1   4 20.2385 4.66906   2
   4   1  -4 38.1795 6.08879   4
   4  -1   4 39.9169 6.41601   4
   4  -1  -4 30.7451 5.09864   4
   4   1   4 27.3162 6.62181   3
  -1  -4   4 27.8394 5.47024   4
  -1  -4  -4 32.8078 5.90198   2
   1   4  -4 27.6347 5.50257   1
  -1   4   4 38.5649 6.59144   4
  -4   1   4 35.7801 7.31298   1
   4  -1  -4 34.3033 5.66342   4
   4   1  -4 38.4910 6.74367   2
  -1  -4  -4 34.8503 7.56655   3
   4  -1  -4 34.6946 6.25328   3
  -4  -1  -4 28.8945 2.91327   1
  -1   4  -4 30.7218 4.91338   4
  -1   4   4 15.9287 4.50733   3
  -1   4   4 39.2172 6.07635   2
  -4   1   4 33.3381 5.55342   3
   1   4   4 33.5663 6.34162   1
   1   4  -4 26.5272 5.21219   3
   1  -4  -4 30.0563 6.22412   4
   4   1  -4 34.9285 5.74335   3
  -1   4  -4 35.6382 5.41308   3
   4  -1   4 32.0829 6.13711   2
   1   4  -4 44.9369 6.61002   2
   1   4  -4 29.9534 5.03971   4
  -1   4   4 40.0290 8.13615   1
   4  -1   4 33.4351 4.18013   3
  -4  -1  -4 34.3839 6.21385   2
   1   4   4 25.7660 5.86203   4
  -4  -1   4 28.2859 5.28417   4
  -4  -1   4 39.7129 6.82721   2
  -1   4  -4 28.9661 4.81070   1
   4  -1  -4 32.8695 5.92340   2
   1  -4  -4 41.7353 6.19166   2
  -4  -1  -4 32.1604 5.06512   3
  -4   1  -4 35.8113 5.71961   2
  -4   1  -4 32.1000 2.81230   1
  -4  -1   4 28.3623 5.73526   1
   1  -4  -4 38.9580 8.10974   1
   4  -1  -4 40.3182 7.66762   1
   1   4  -4 29.1183 4.96731   1
   4  -1  -5 710.369 29.3318   3
   1   4   5 838.049 30.0227   2
   1   4  -5 783.205 28.3168   3
  -1  -4  -5 777.829 30.9992   1
  -1  -4  -5 771.859 33.1991   4
  -1  -4  -5 736.068 33.4330   3
   4   1  -5 596.062 25.1567   4
  -1   4  -5 717.661 26.3621   4
   1   4   5 757.343 34.5083   3
   4   1   5 782.147 33.3074   4
  -4   1   5 690.644 31.0809   1
  -4  -1   5 683.283 27.9435   2
   1   4   5 628.958 30.1425   1
  -1  -4   5 680.475 25.7662   1
  -1   4   5 691.078 26.7802   2
  -1  -4  -5 720.702 28.6761   2
   1   4  -5 697.895 27.4570   4
  -1  -4   5 706.504 28.4976   2
  -4  -1  -5 726.038 18.4036   1
  -4   1  -5 777.551 29.3643   4
  -1   4  -5 702.860 26.6666   2
   1  -4  -5 798.869 34.5927   1
  -1   4  -5 741.903 26.5980   4
   1   4  -5 691.341 26.1157   1
  -1   4  -5 755.955 25.2144   1
   4   1   5 559.294 26.3182   2
  -1   4  -5 742.823 25.6432   1
   1   4  -5 595.400 25.4888   2
  -4  -1  -5 724.594 29.4763   2
  -4  -1  -5 721.204 26.9710   3
  -4   1   5 717.343 28.0918   3
  -1   4   5 794.823 35.1228   3
   1   4  -5 729.467 27.4868   3
   4   1   5 760.903 29.5293   3
   4   1   5 769.299 19.8161   1
  -4  -1   5 784.383 30.5794   1
   1  -4  -5 731.613 30.8999   4
   1  -4  -5 710.992 33.7128   3
   1   4   5 751.540 32.8529   4
   4  -1  -5 771.830 29.3961   2
  -1  -4   5 537.916 24.3098   4
   4   1  -5 739.943 29.8473   2
  -4   1  -5 710.120 23.7226   3
   4  -1   5 625.544 25.9217   4
  -1   4  -5 713.772 25.2965   3
  -4  -1   5 826.161 29.2967   4
  -4  -1  -5 772.800 31.0091   4
  -4  -1   5 738.159 27.7243   3
  -4   1  -5 674.701 26.8890   2
   1  -4   5 657.737 27.0963   2
  -1   4   5 763.578 35.3859   1
   4  -1   5 641.395 14.0752   1
  -4   1  -5 669.937 16.1593   1
  -1   4   5 731.944 30.3217   4
   4  -1   5 658.918 28.7600   2
   4  -1   5 691.799 22.0626   3
   4  -1  -5 764.810 27.5632   4
   4   1  -5 774.082 28.5813   3
   4  -1  -5 795.850 33.5162   1
   4  -1  -5 697.631 26.1310   4
   4   1  -5 776.001 30.3635   1
  -1   4  -5 737.033 25.9988   3
  -4   1   5 591.649 24.8040   2
   1  -4  -5 702.953 26.7607   2
  -4   1  -6 8.58100 2.40098   1
  -1   4  -6 4.11902 3.42520   4
   4  -1   6 14.9130 4.18618   3
  -4  -1  -6 10.5694 2.98252   1
  -1   4  -6 11.0441 3.87811   2
   4  -1  -6 7.30036 4.89182   3
  -1   4   6 11.9722 5.12891   4
  -4   1  -6 4.86095 2.52866   2
   4  -1  -6 19.5805 5.59501   4
   4  -1  -6 7.28469 3.46734   4
  -1  -4   6 7.42728 3.99125   4
   4   1  -6 2.06052 2.30792   3
   4  -1   6 9.51871 3.91443   2
   1  -4   6 8.41607 4.29113   2
   1  -4  -6 5.27077 2.69548   1
   4  -1  -6 4.52654 3.27211   2
   1  -4   6 6.98856 2.51241   1
   1   4  -6 5.69639 2.14909   3
   1   4  -6 16.3096 5.28805   4
   4  -1  -6 7.46302 3.74479   1
   4  -1   6 5.20767 1.78899   1
  -1  -4  -6 22.3018 6.66564   3
   1   4  -6 4.99701 2.79081   1
  -1   4   6 8.45981 5.27919   3
  -4   1  -6 8.34080 3.40169   4
  -1  -4  -6 1.82896 2.51641   2
  -4   1   6 13.3496 5.63101   3
   1   4   6-0.56302 3.24262   2
  -4  -1  -6 6.63572 3.82683   2
  -1   4  -6 6.92884 2.87569   4
   4   1   6 16.5543 6.33202   4
  -4  -1   6 1.63218 1.94518   1
  -1   4   6 9.39072 3.45318   2
   4   1  -6 4.91002 2.04611   2
  -1   4  -6 7.99781 3.23153   3
   4   1  -6 5.02725 2.90077   4
   1  -4  -6-4.42455 4.63478   4
   1   4  -6 12.0126 4.33578   2
  -4   1   6 23.4903 6.85673   1
   4  -1   6 9.87846 4.02206   4
  -4  -1  -6 12.8252 4.58284   4
  -1   4   6-2.68914 4.53263   1
   1  -4  -6-5.42095 4.94540   3
  -4   1   6 2.97277 2.55797   2
  -4   1  -6 9.20659 3.94854   3
   4   1  -6 6.61406 3.19455   4
   1  -4  -6 4.61507 3.50311   2
   1   4   6 12.0116 5.76676   1
  -1  -4   6 5.06746 2.94681   2
  -1  -4  -6 3.89546 3.60549   4
   1   4   6 13.1995 5.19656   4
   1   4   6-0.78418 4.27102   3
   4   1  -6 2.24943 2.19818   1
  -4  -1  -6 12.1142 3.95190   3
  -4  -1   6 9.60725 4.02943   2
   1   4  -6 2.78573 2.56980   3
  -1   4  -6 12.7638 3.94146   1
  -1   4  -6 2.70455 1.89548   3
  -1  -4   6-1.11873 1.88006   1
  -1  -4  -6 27.6002 7.64361   1
   4   1   6 7.21739 3.40087   3
  -4  -1   6 2.64677 2.28763   3
   4   1   6 11.3183 3.63015   2
   4   1   6 8.00201 2.80668   1
   1   4   7 8797.74 127.828   1
  -4  -1  -7 8965.01 121.754   4
   1   4   7 9671.53 132.881   4
   1   4  -7 8743.61 113.526   2
   4   1   7 9130.15 128.542   4
   1  -4  -7 8978.42 129.383   1
  -1  -4  -7 9619.68 134.161   3
  -4   1  -7 9295.95 119.482   4
  -4   1  -7 8394.50 79.1560   1
  -1  -4   7 9014.04 118.181   2
  -4   1   7 8588.09 112.883   3
   4  -1  -7 9414.23 122.513   3
  -4  -1   7 8964.50 115.183   2
  -1   4   7 8526.05 131.798   1
   1   4  -7 9186.76 105.912   1
  -4   1  -7 9459.15 118.489   2
  -1   4  -7 9284.57 106.458   3
   1   4  -7 9056.84 111.084   3
   4  -1  -7 8709.66 115.177   2
  -1  -4  -7 8744.44 117.112   1
  -4  -1   7 8754.99 116.082   1
   1   4  -7 9068.31 112.498   4
  -1  -4   7 8782.98 104.242   1
  -4   1  -7 8937.47 102.435   3
  -1   4  -7 8712.58 108.437   4
   4   1   7 8380.54 82.7515   1
  -4  -1   7 9183.48 113.690   3
   1   4   7 9549.51 120.553   2
  -4  -1  -7 8350.42 86.6519   1
   4   1  -7 8664.39 115.641   1
   4   1  -7 9126.63 113.536   4
   4   1   7 8755.27 114.268   3
  -1   4   7 7675.18 124.358   3
  -1   4  -7 8897.57 103.772   3
  -1   4  -7 8392.48 110.589   2
   4  -1   7 9609.47 118.227   4
   4   1  -7 8836.96 117.827   2
  -4  -1  -7 9173.61 114.374   3
   4  -1   7 8322.93 95.9693   3
   4  -1  -7 8212.47 105.323   4
   4   1  -7 9050.47 111.198   4
   1  -4   7 9040.48 98.2393   1
  -1   4  -7 9457.21 111.855   4
   1  -4  -7 8960.62 123.088   4
   1   4  -7 9279.73 114.663   4
   4   1   7 9553.45 126.454   2
  -4   1   7 9713.76 116.880   2
  -1  -4  -7 8942.75 115.933   2
  -4   1   7 9079.63 125.861   1
   4  -1  -7 10124.7 133.586   1
   1   4  -7 9141.00 111.461   3
   4  -1   7 9019.83 73.0240   1
  -1  -4  -7 9090.20 127.588   4
   4   1  -7 8803.88 113.623   3
   1  -4  -7 8143.05 127.427   3
   1   4   7 9176.16 136.274   3
   4  -1   8 26.5529 7.05805   4
  -1  -4  -8 30.4330 8.50234   1
  -4   1  -8 37.1881 6.43549   1
   1   4  -8 28.6541 7.42248   4
  -4  -1  -8 24.2232 5.66878   1
  -1  -4   8 30.5774 7.35646   2
  -4   1  -8 30.0058 6.47629   3
  -1   4   8 29.9070 8.34704   3
  -1  -4  -8 41.1354 9.67957   4
  -4   1   8 30.2378 7.49262   2
   1  -4  -8 41.3278 9.78845   1
   1  -4  -8 16.6621 6.38770   2
   4   1   8 26.0707 8.50395   2
   1  -4  -8 14.9410 4.81082   4
   4   1   8 32.6069 8.85013   4
   1   4   8 39.5431 10.9576   3
   4  -1  -8 28.6645 8.03964   1
  -4   1  -8 38.4366 8.44037   2
  -4   1   8 39.9076 9.11375   3
   4  -1   8 31.1469 6.33684   3
   1   4  -8 31.3056 6.79610   3
  -4  -1   8 38.0837 8.95365   1
   4   1  -8 35.3413 7.71501   4
   1   4  -8 19.4978 7.05788   2
   1  -4   8 28.2296 6.47181   1
  -1   4   8 17.5158 6.25422   4
   4  -1  -8 24.9975 7.45866   4
  -1   4  -8 31.0804 6.95242   4
   4  -1   8 33.4549 5.27778   1
  -4  -1  -8 21.0167 6.16892   3
  -4   1  -8 39.6907 9.50670   4
   4  -1  -8 19.9842 7.25800   3
  -4  -1  -8 43.2391 8.75320   2
  -4  -1   8 41.6236 8.79958   3
  -1   4  -8 22.0375 6.05223   3
   4  -1   8 27.7746 8.06668   2
  -4  -1  -8 32.1289 8.77948   4
  -1   4  -8 28.5677 7.09438   4
   1  -4  -8 22.4520 6.49583   2
   1   4  -8 24.8641 6.79199   1
  -1  -4  -8 15.3800 5.62538   2
  -1  -4  -8 36.4572 10.2545   3
  -4  -1   8 31.7516 8.01975   2
   1   4   8 24.8499 7.16190   1
   4   1   8 28.5683 5.48714   1
   1   4   8 33.5171 9.55277   4
   1   4  -8 36.2365 7.95782   4
   1   4   8 30.4530 7.84837   2
   4   1  -8 28.3297 7.15449   4
  -4   1   8 40.7368 9.73126   1
  -1   4  -8 31.6467 7.07898   3
  -1   4  -8 31.5985 7.65393   2
   4  -1  -8 26.6401 6.74685   4
  -1   4  -8 26.6928 5.93525   1
  -1   4  -8 27.6140 6.88032   2
   1   4  -8 36.3990 7.41532   3
   1  -4  -8 21.2614 7.59561   3
   4  -1  -8 27.7599 7.58693   2
   4   1  -8 39.2482 8.14926   2
  -1  -4   8 20.8508 5.87412   1
  -1   4   8 37.3173 10.2095   1
   4   1  -8 25.1267 6.74516   1
   4   1   8 21.5012 6.25433   3
   4   1  -8 30.3118 7.81694   3
  -1   4  -9 3068.81 64.2369   1
   4  -1   9 2880.27 73.5332   4
  -4  -1  -9 2458.03 67.4208   3
  -1   4  -9 2961.09 75.3501   2
  -4   1   9 2867.01 73.2323   3
  -4   1  -9 2716.17 54.5852   1
   4   1  -9 2760.37 73.0266   1
  -1  -4   9 2893.12 66.3731   1
   4   1  -9 2746.99 69.9291   4
   4   1  -9 2750.56 74.6076   2
   4  -1  -9 2919.25 75.6034   2
  -1   4  -9 3049.95 69.8687   3
   1  -4   9 2823.09 61.3099   1
   4   1  -9 2301.61 65.8463   4
   4  -1  -9 2698.10 76.4983   1
   4   1   9 2477.36 52.9976   1
  -4  -1  -9 3082.74 80.1221   4
  -4  -1   9 2672.63 71.5634   2
  -1  -4  -9 2501.41 73.6731   4
  -4   1  -9 2780.63 66.4763   3
   1  -4  -9 2751.14 78.5938   1
   1   4   9 2752.81 78.5788   1
   1   4  -9 2662.05 63.9185   1
   1  -4  -9 2917.83 82.9110   3
   1   4  -9 2894.49 71.3838   3
   1   4  -9 2716.77 68.5534   3
  -4   1   9 2604.84 69.0084   2
  -1  -4  -9 2936.16 74.0372   2
  -1   4   9 2841.57 76.1384   4
  -1   4   9 2519.01 77.9239   1
  -1  -4  -9 3034.90 75.7387   1
   1   4   9 2915.35 83.9708   3
   1   4   9 2268.86 67.0181   2
  -4  -1  -9 2977.35 77.0000   2
   1  -4  -9 2821.70 72.3820   2
   4  -1   9 2379.85 71.3725   2
  -4  -1  -9 2829.46 59.3221   1
  -1  -4  -9 3005.86 82.7440   3
   4   1  -9 2278.71 65.7153   3
   4  -1  -9 2890.62 76.6796   3
   1  -4  -9 2945.76 72.8490   2
   1  -4  -9 2802.42 77.2060   4
  -1   4   9 2654.86 80.1729   3
  -4   1   9 3014.60 79.9974   1
   4  -1  -9 3003.04 74.6753   4
  -1   4  -9 2833.79 76.3217   2
  -4  -1   9 2722.74 71.9229   1
   1   4  -9 2844.63 74.1754   2
  -4  -1   9 2916.28 72.8394   3
  -1   4  -9 2733.98 69.8643   4
   1   4   9 2501.23 73.9963   4
   1   4  -9 2961.68 72.4564   4
  -4   1  -9 2805.44 74.4605   4
   4  -1   9 2963.49 52.6009   1
   1   4  -9 2745.57 71.3624   4
   4   1   9 3120.31 81.9560   2
  -4   1  -9 2993.86 75.4970   2
  -1   4  -9 2767.85 69.3339   4
   4   1   9 2930.72 80.0102   4
   4  -1   9 2944.88 66.5562   3
   4  -1  -9 2721.95 69.1546   4
  -1  -4   9 2851.86 75.2707   2
   4   1   9 2806.41 74.3258   3
  -4  -1  10 9.71134 5.57698   2
   1  -4 -10 2.01068 4.25738   4
   1   4 -10 0.35352 3.17465   4
  -1   4 -10-0.47899 2.85889   3
   4  -1 -10 9.53135 6.51439   4
  -1  -4  10 9.27160 7.24008   2
   1   4  10 1.27667 5.53213   1
  -1   4  10 2.06550 4.27547   1
  -4   1 -10 6.94556 4.63313   3
   1   4  10 2.54502 3.65349   3
   1   4 -10 2.42205 3.94742   4
  -4   1  10-0.80707 3.25260   1
  -4  -1  10-1.27846 4.16528   1
  -1  -4 -10 7.12887 6.98329   3
   1  -4  10-3.64533 3.83826   3
  -4  -1  10 5.07563 5.23782   3
   4   1 -10 2.91700 3.13172   2
  -1   4 -10 6.59423 5.43653   4
   4   1 -10-0.51350 3.75607   4
  -1  -4  10 20.3953 6.52030   1
   4  -1  10 7.02227 5.93134   4
  -4   1 -10 3.97806 4.35318   1
   1   4 -10 0.94541 3.66540   2
   4   1 -10-1.27282 4.62542   1
   4   1  10 0.74902 3.27365   3
   1   4  10 12.4129 7.20791   4
   1  -4  10 8.49720 4.79645   1
   4   1  10 1.87336 3.69449   4
   1   4  10 0.37329 5.15246   2
   4  -1  10 3.88830 5.68747   2
   4  -1 -10 1.20964 3.54601   4
  -4   1 -10 8.93736 5.47425   2
   4   1 -10-1.25985 2.98135   3
  -4   1  10 5.48220 5.90220   3
   4   1 -10 6.13936 4.77477   4
   4  -1  10 2.85715 2.69669   1
   1  -4 -10 10.5745 5.51977   3
  -1   4 -10 8.60213 7.66497   2
  -1   4 -10 15.2550 7.38642   2
  -1  -4 -10 9.56112 6.44457   1
   4   1  10 5.97179 4.25264   1
   1  -4 -10 0.69418 3.63756   2
   1  -4 -10-5.70046 6.57197   1
  -4  -1 -10-8.21209 5.73142   4
  -4  -1 -10-0.19130 2.83810   2
  -1   4 -10 1.46473 4.28981   1
  -1  -4 -10 1.97228 2.70293   2
  -4  -1 -10-0.89400 3.25242   3
   1  -4 -10 3.25898 3.30574   2
   4   1  10 8.80377 6.11967   2
   4  -1  10 3.13537 3.03973   3
  -1   4  10 2.32620 4.19165   4
  -1   4 -10 7.48205 4.25792   4
   4  -1 -10 1.43049 3.42618   1
   4  -1 -10 16.3663 7.82484   3
   1   4 -10-0.14816 2.91662   1
   4  -1 -10 2.65656 4.16391   2
  -4  -1 -10 2.23222 2.63590   1
   1   4 -10 0.16783 3.57348   3
  -1  -4 -10 10.4427 6.63999   4
  -4   1 -10 2.29554 4.08204   4
   4  -1 -11 3560.41 88.5931   4
   4   1  11 3373.29 93.5099   2
   4   1  11 3064.23 66.9827   1
   4   1 -11 3465.58 88.4802   1
   4  -1 -11 3465.13 94.7332   1
   1  -4 -11 3402.42 92.4387   4
   4   1 -11 3238.91 84.6328   4
   1  -4  11 2922.71 70.8550   1
   1  -4 -11 3640.72 91.5389   2
  -4  -1 -11 3425.71 74.2412   1
  -4  -1 -11 3298.24 86.4340   3
   1   4  11 3434.51 99.2863   3
   1   4 -11 3432.88 80.9033   1
   4   1 -11 2883.22 84.5905   2
  -1   4 -11 3357.66 86.8104   4
   4   1  11 3659.06 93.1937   3
   4  -1 -11 2876.66 85.5569   3
  -1  -4 -11 3671.03 90.9331   1
  -4   1 -11 2879.16 85.0619   4
   1   4  11 3402.40 94.2735   4
  -1   4 -11 3350.69 92.8332   2
   1  -4 -11 3543.89 88.4121   2
  -4   1  11 3696.49 96.1743   1
  -1  -4  11 3088.00 76.6947   1
  -4  -1  11 3591.98 91.2514   2
   4  -1  11 3442.09 81.5624   3
  -4   1 -11 2823.84 76.5108   3
   1  -4 -11 3551.33 99.5862   3
  -4   1 -11 3239.74 68.9686   1
  -1   4  11 3576.44 101.482   3
  -1   4  11 3615.97 94.1318   4
   4  -1  11 3271.83 88.5163   4
   1   4 -11 3412.42 90.6762   2
  -4   1 -11 3404.36 94.5086   2
  -1  -4 -11 3533.62 89.2470   2
  -1   4 -11 3481.27 77.8663   1
  -1  -4 -11 3402.64 93.9507   4
   1   4 -11 3261.70 84.8677   4
   4   1 -11 2917.11 82.5154   4
   4  -1 -11 3349.05 89.5667   2
   4   1  11 3387.54 94.9118   4
   4  -1 -11 3518.07 90.2516   2
   4   1 -11 3245.77 86.1713   3
   1   4 -11 2862.08 85.3039   2
  -1   4 -11 3613.73 88.5897   4
  -4  -1  11 3280.88 85.6820   3
   1   4  11 2994.12 85.2804   2
  -4  -1 -11 3748.25 95.1989   2
   1  -4  11 3196.59 79.3358   3
  -4   1 -11 3278.90 88.6524   2
  -1  -4  11 3247.75 83.0832   3
   1   4  11 3290.32 93.8188   1
   4  -1  11 3446.99 66.0556   1
  -1  -4 -11 3257.63 94.4418   3
  -1   4 -11 3507.87 84.8126   3
  -1   4  11 3721.31 103.738   1
   1  -4 -11 3396.42 94.7527   1
   1   4 -11 3316.29 85.3056   3
   1   4 -11 3323.03 86.4164   4
  -4   1  11 3614.12 91.5373   3
  -1   4 -11 3371.63 90.6952   2
  -4  -1 -11 3068.02 87.5196   4
   4  -1 -11 3597.82 91.9448   4
  -1   4  12 25.3619 10.1819   1
  -1   4  12 24.5359 9.15770   4
  -1   4 -12 35.5974 10.3787   3
  -1   4 -12 10.0342 6.93162   2
   1   4 -12 26.1031 10.9603   2
  -1   4  12 27.5957 11.1813   3
   4  -1 -12 43.5907 12.0286   3
  -4   1  12 14.5709 6.96270   3
  -4   1 -12 23.7573 9.15667   2
   4  -1 -12 15.8338 6.82932   2
  -1   4 -12 31.0142 9.76081   4
  -4  -1 -12 19.2321 6.94235   1
   4  -1  12 27.5255 6.94411   1
   4  -1  12 11.1794 7.60263   4
  -4  -1 -12 17.4988 7.41460   3
   4   1 -12 15.8246 7.64409   1
   4   1 -12 2.72672 5.20323   4
  -4   1 -12 18.9570 7.74216   4
   4   1  12 28.2836 7.18247   1
   1  -4 -12 21.9406 9.10927   1
  -4  -1 -12 13.4313 8.41563   2
   4   1 -12 28.0239 10.3226   2
   4  -1 -12 24.5204 9.14598   2
   1  -4 -12 37.5123 13.2234   3
  -1   4 -12 18.7338 7.47584   4
   1  -4 -12 23.7295 8.98436   2
   4  -1 -12 32.7522 9.84831   1
  -1  -4  12 17.9892 7.88077   3
  -1  -4  12 19.5069 6.95620   1
  -4   1  12 7.15414 5.29574   1
  -4  -1 -12 25.5503 9.93968   4
   1  -4  12 14.3955 6.58530   1
   1   4  12 13.0679 8.64366   1
   1  -4 -12 18.0116 9.33042   2
   4  -1  12 18.4111 7.48970   3
  -4  -1  12 19.3171 7.69055   1
  -1   4 -12 21.3570 7.96243   1
   1   4 -12 21.3670 7.93106   1
   1  -4 -12 42.7535 12.7819   4
  -4   1 -12 15.2365 6.75754   3
  -1   4 -12 14.9898 8.80451   2
  -1  -4 -12 33.5520 11.5953   3
   4  -1 -12 16.0639 7.86280   4
   1   4 -12 15.4069 7.07775   4
   4   1  12 10.5058 6.07893   3
   4   1 -12 18.3105 8.20068   3
   4  -1 -12 11.7734 7.61678   4
   1   4 -12 33.8974 12.2232   2
  -4   1 -12 22.1408 8.27599   2
   4   1  12 22.1436 9.50923   4
  -4  -1  12 18.2224 10.0885   2
   1   4  12 21.3204 11.4569   3
  -4   1 -12 19.2175 6.60988   1
   4   1 -12 29.0034 10.6352   4
   1   4 -12 18.4515 6.02667   3
   1   4  12 15.4543 6.97807   4
   1   4 -12 30.7005 9.59298   4
  -1  -4 -12 31.8477 11.4245   4
  -1  -4 -12 15.9899 6.22470   2
   1  -4  12 27.1401 7.85628   3
  -1  -4 -12 19.1441 7.90021   2
   4   1  12 47.5919 13.3195   2
  -1  -4 -12 16.9032 6.21623   1
  -4  -1  12 13.4683 6.86591   3
  -4  -1 -13 247.968 27.6328   4
   1   4 -13 211.079 24.4299   4
   1   4  13 218.892 27.9353   3
  -1   4 -13 244.327 25.8251   4
  -1   4  13 248.748 28.8203   1
  -4   1  13 242.093 27.3236   1
   1  -4  13 224.111 21.6321   1
   4  -1 -13 240.561 27.2437   3
  -4  -1 -13 166.585 22.3015   2
   1  -4  13 235.163 24.0600   3
   1   4  13 215.104 26.6578   4
  -1   4 -13 253.363 23.8488   1
   1  -4 -13 277.701 31.6346   3
  -4  -1  13 202.938 23.9142   3
   1   4 -13 192.337 25.5213   2
  -4   1 -13 208.020 24.3583   4
   4   1  13 215.342 25.3990   3
  -4   1  13 230.544 25.7575   3
   1   4 -13 225.288 26.3413   2
   1  -4 -13 236.773 24.8200   2
   4   1 -13 206.516 23.9326   1
  -1  -4 -13 249.384 27.7612   4
   4  -1  13 153.098 21.5195   4
   4  -1 -13 271.349 27.9809   2
   4   1  13 205.278 19.4685   1
  -1   4  13 238.259 26.0068   4
   1   4 -13 256.887 24.7331   1
  -1  -4 -13 256.227 26.8232   2
   4   1  13 192.215 25.2039   4
  -1  -4  13 226.708 23.9058   3
  -4  -1 -13 208.127 20.2289   1
  -4   1 -13 220.306 24.0358   3
   4  -1  13 242.715 20.2737   1
   4   1 -13 202.595 25.0360   2
  -4   1 -13 283.177 28.5103   2
  -1   4 -13 262.043 28.2222   2
  -1   4 -13 206.127 23.7268   4
  -1  -4 -13 229.088 25.3717   2
  -4  -1 -13 228.871 25.8803   3
  -4  -1  13 150.103 20.8166   1
   4  -1 -13 212.510 24.6572   4
   4  -1  13 183.252 21.3528   3
   1   4  13 229.536 26.5405   1
   4   1 -13 220.577 24.4938   4
  -1   4 -13 303.444 31.0075   2
   1  -4 -13 250.187 27.7138   4
   4   1 -13 220.865 24.9946   4
   1   4 -13 225.084 24.4942   3
  -1   4  13 176.278 25.5761   3
   1   4 -13 228.171 25.4887   4
   4   1 -13 237.396 26.3485   3
   4  -1 -13 208.727 24.3035   2
   4  -1 -13 213.782 25.1294   4
   1  -4 -13 234.439 25.5711   2
  -1   4 -13 247.292 25.3600   3
   4   1 -13 265.453 29.0440   2
  -4   1 -13 239.333 21.4977   1
  -4   1 -13 223.421 26.7059   2
  -1  -4 -13 201.098 23.4293   1
  -1  -4  13 239.037 23.1643   1
  -1  -4 -13 142.840 22.3973   3
   1  -4 -13 262.143 28.6123   1
   4  -1 -13 295.830 30.0934   1
   1   4 -14 9.78439 7.86681   2
   4  -1  14 7.98371 8.63294   3
   1  -4 -14 8.39001 8.25349   2
  -4   1 -14 2.44691 9.17116   2
   1  -4 -14 13.3939 9.48584   4
   4   1 -14 8.16165 7.64214   1
   1   4 -14 0.75930 6.27138   4
  -4   1  14 26.4895 11.6345   3
   1   4 -14 6.52887 6.83073   4
  -4  -1 -14 11.8388 7.54542   1
   4   1 -14 9.67488 8.30823   4
  -1   4 -14 16.2099 8.70923   3
   1  -4  14 37.2653 11.1210   3
  -4   1 -14 0.29649 5.84562   2
  -1   4 -14 36.1568 11.8425   2
   4  -1  14 11.0042 8.98639   4
   4   1 -14 10.4584 7.95414   2
  -1  -4 -14 9.56925 9.36347   3
  -4  -1 -14 25.8564 11.3257   4
   4  -1 -14 16.9126 8.81087   4
  -1   4  14 6.96361 6.79215   4
  -4  -1 -14 10.7647 8.27621   2
  -1   4 -14 11.8023 8.32621   1
   1   4  14 2.85852 6.47126   1
   4   1  14 10.7443 7.17612   1
  -4  -1  14 11.2308 8.52037   1
   4  -1  14 2.57435 4.88723   1
  -1   4 -14 2.79074 6.10109   4
  -1  -4 -14 13.6785 11.4016   4
   1   4  14 17.0425 9.28120   4
   1   4  14 23.6804 10.5626   3
  -1  -4 -14 0.26802 5.29314   2
   1   4 -14 6.49535 7.38753   3
   1   4 -14 12.8065 8.39047   1
   4  -1 -14 4.37944 6.13881   2
  -4  -1 -14 64.4959 14.6111   3
  -1  -4  14 1.30465 6.14625   1
   1  -4 -14 27.3542 11.5354   2
   4   1 -14 0.54570 7.00335   2
   4   1 -14 15.7383 9.75036   4
   4  -1 -14 15.6537 12.5625   1
   1  -4 -14 3.97566 8.25451   1
  -4  -1 -14 0.82370 4.58060   2
  -1   4 -14 8.02050 6.41060   4
  -4   1  14 1.12559 4.72405   1
  -1  -4 -14 3.23448 7.72873   1
  -4   1 -14 2.80311 7.40273   4
   4  -1 -14 9.58470 6.65560   4
   4   1  14 12.3788 8.96764   3
  -1   4  14 4.49191 7.75856   3
   1  -4 -14 38.7682 14.2393   3
   1   4 -14 1.97229 6.34544   2
  -4  -1  14 16.9724 9.25980   3
   4  -1 -14 3.71022 7.16122   2
  -1   4  14 3.05612 6.40447   1
  -1  -4  14 18.2875 9.13100   3
   4  -1 -14 25.4676 12.3273   3
  -1   4 -14 14.7664 7.47323   2
  -4   1 -14 9.58889 8.36939   1
  -1  -4 -14 15.3034 9.31616   2
   1  -4  14 4.71892 5.20157   1
   4   1  14 7.15686 7.88786   4
  -4   1 -14 8.80759 7.07254   3
   4   1 -14 0.78160 5.38370   3
   1   4 -15 5669.43 136.029   4
  -4  -1 -15 5709.67 117.927   1
   1   4 -15 5650.50 126.589   1
   4   1  15 6101.72 151.114   4
   1   4 -15 5994.58 147.270   2
  -1   4  15 5771.46 148.100   1
  -1  -4 -15 6287.58 138.379   1
  -4  -1 -15 5831.94 144.756   2
   1  -4 -15 6359.92 149.728   4
  -1   4 -15 5845.51 136.999   4
   1  -4  15 5511.54 117.131   1
  -4   1 -15 5633.86 131.582   3
   1  -4  15 5717.55 129.134   3
  -4  -1 -15 5637.35 138.982   2
  -4  -1 -15 5785.69 137.742   3
   4   1  15 5744.30 139.509   3
  -4   1 -15 5971.37 141.258   2
   4   1 -15 5891.19 138.695   3
   4  -1  15 6129.21 145.986   4
   4   1  15 5729.36 114.195   1
   1   4  15 6328.24 149.816   4
   1   4 -15 6311.39 142.459   4
   4  -1 -15 6252.14 142.459   4
   4   1 -15 5298.42 134.390   2
   4  -1  15 5536.52 127.443   3
   1  -4 -15 5212.90 141.042   3
  -1  -4 -15 5832.15 135.528   2
   4  -1 -15 5983.50 142.764   4
  -1  -4 -15 6187.22 151.328   3
  -4   1 -15 6184.19 118.602   1
  -1   4 -15 5941.81 146.040   2
  -1   4 -15 5813.62 137.992   4
  -4   1 -15 6093.25 151.024   2
  -1   4 -15 6041.86 145.937   2
  -1  -4  15 6109.16 129.482   1
   4  -1  15 6167.45 112.746   1
   1   4 -15 5744.23 133.561   3
  -1   4 -15 5590.42 129.537   3
   1   4 -15 6225.84 147.611   2
   4   1 -15 5715.08 139.442   4
  -4   1  15 6027.59 144.653   1
   1  -4 -15 6037.01 145.221   1
  -4  -1  15 5927.71 138.676   1
   1   4  15 6035.85 146.049   1
   4   1 -15 6092.33 138.605   1
  -1  -4  15 5705.97 132.690   3
  -4   1  15 6836.30 152.940   3
   4  -1 -15 6107.39 144.933   1
  -4   1 -15 5935.02 144.798   4
  -1  -4 -15 6036.22 146.279   4
   4  -1 -15 5389.88 134.502   2
   4   1 -15 6237.38 141.117   4
   4   1 -15 5373.80 137.522   2
   1  -4 -15 5630.48 135.833   2
   1   4  15 6077.38 157.674   3
   1  -4 -15 5897.03 136.666   2
   4  -1 -15 6180.31 146.966   3
  -1  -4 -15 6250.25 144.732   2
  -4  -1 -15 6126.15 146.798   4
  -1   4  15 5939.07 153.504   3
  -4  -1  15 5646.98 134.361   3
   4  -1 -15 5904.04 141.580   2
  -1   4  15 6410.52 148.387   4
   1   4  16 28.4799 12.6413   3
   1   4 -16 56.0001 16.7804   4
  -1  -4 -16 58.6012 19.0071   3
   4   1  16 43.7232 11.4830   1
   1   4 -16 18.8832 12.6281   2
   1   4  16 11.8066 9.11133   4
   1   4 -16 15.9814 10.1770   2
  -4  -1 -16 30.1257 12.5990   2
   1  -4  16 23.8333 11.5491   3
   1   4 -16 25.8665 12.9053   1
  -1  -4 -16 53.0602 16.9130   4
  -4  -1 -16 24.0532 9.54196   1
   4  -1 -16 42.4631 15.6224   1
   1  -4 -16 42.0711 13.6042   2
  -4   1 -16 26.9388 12.2556   4
  -1   4 -16 12.4901 10.0629   3
   4  -1 -16 17.2596 10.4513   2
   1   4  16 21.0387 12.2110   1
   1  -4 -16 44.3733 16.1110   1
   4   1 -16 28.0908 11.4474   4
  -1   4  16 22.3718 12.5060   3
   4   1 -16 50.7497 15.4791   2
  -4   1 -16 48.0925 15.4818   3
  -4   1  16 45.8252 14.1188   3
   4   1  16 31.5195 14.1778   3
  -4  -1 -16 21.3436 13.0937   2
   1   4 -16 6.18183 8.50979   3
   4  -1  16 19.1704 10.0556   3
   4  -1 -16 29.4649 15.5584   2
   1  -4  16 39.6076 13.2084   1
   4   1  16 29.9504 12.5583   4
   4  -1 -16 35.0772 14.7325   3
   4   1 -16 49.3789 15.5569   1
  -1  -4  16 11.5982 9.17790   1
   4  -1 -16 28.4885 13.1739   4
   1   4 -16 29.1507 11.8894   4
  -1  -4 -16 34.4913 13.4543   2
  -1   4  16 38.7801 13.6796   4
  -1   4  16 27.2929 13.5456   1
   4   1 -16 48.5810 15.9478   3
  -1   4 -16 30.8394 12.9282   4
   1  -4 -16 40.7340 15.6575   3
  -4   1 -16 39.4934 14.6041   2
  -1   4 -16 21.7440 13.3509   1
   4  -1 -16 28.4524 11.8226   4
  -4   1 -16 22.6783 11.6955   2
  -1   4 -16 3.32190 6.97411   2
  -4  -1  16 11.2678 9.70970   3
  -4   1 -16 33.4678 11.7362   1
  -1   4 -16 25.2197 14.0862   2
  -4  -1 -16 22.4467 11.5055   3
  -1  -4 -16 34.3696 16.0126   1
  -4  -1  16 23.1689 10.8167   1
  -1  -4 -16 42.3711 14.3524   2
   1  -4 -16 30.1568 15.3837   4
  -4  -1 -16 24.3399 11.5713   4
   4   1 -16 30.0114 12.0091   4
  -1   4 -16 23.6154 13.2570   4
  -4   1  16 23.4265 12.8004   1
   4   1 -16 26.7187 13.4224   2
   4  -1  16 24.0713 8.34272   1
   4  -1  16 31.1491 13.7852   4
   1  -4 -16 39.7168 13.8018   2
   4  -1  17 61.1445 16.2511   3
   4   1 -17 27.1534 12.0285   4
  -4   1 -17 54.2594 15.4594   3
  -4   1 -17 43.3993 16.6555   2
   4  -1 -17 65.3314 18.3498   4
   1   4 -17 79.7424 21.2335   2
  -1  -4  17 59.8136 15.4105   1
   1  -4 -17 49.3130 17.6445   4
  -1   4 -17 57.9722 15.9714   4
   1   4 -17 86.6379 18.9205   1
   4   1 -17 62.5289 17.6806   2
   1   4  17 42.1587 15.7618   3
   4  -1 -17 79.1143 20.0949   3
  -4   1  17 49.7135 15.7807   3
   4   1 -17 70.6022 19.0434   3
  -1  -4 -17 58.9390 16.1741   1
  -1   4 -17 115.723 22.3805   4
   1   4 -17 81.9639 18.6642   2
  -1   4 -17 75.8753 17.8790   1
  -4  -1  17 43.9565 14.6815   3
   1   4 -17 79.6778 20.5298   4
   4   1  17 85.6901 19.3461   3
   1  -4 -17 41.1355 16.4118   3
  -4   1  17 138.825 25.3505   1
  -4  -1 -17 105.926 22.2949   4
  -4  -1 -17 77.1015 15.4486   1
   1  -4 -17 47.2450 14.6983   2
  -1  -4 -17 72.0705 20.2513   4
  -4   1 -17 82.1290 19.7256   2
  -1   4 -17 100.693 22.2949   3
  -1   4  17 69.8506 19.1430   1
  -1  -4 -17 59.7858 17.0949   3
   4  -1 -17 40.4503 15.0767   2
   4   1  17 55.1325 14.1479   1
   1   4  17 87.6571 19.0358   1
   4   1  17 94.5906 20.8311   4
  -1   4  17 49.0463 15.6982   3
   4   1 -17 43.9794 14.8180   2
   4  -1 -17 54.2015 18.1810   4
   1  -4 -17 33.2201 13.9238   1
  -4   1 -17 94.0261 21.1433   4
   4  -1 -17 44.0304 16.4955   1
   4  -1  17 80.8595 19.8002   4
   4   1 -17 67.9356 17.3640   4
  -4  -1 -17 43.3764 16.1093   2
  -1  -4 -17 36.7684 13.7093   2
  -1  -4 -17 74.0478 19.3132   2
  -4   1 -17 56.8041 14.0613   1
   1  -4  17 54.6329 14.2485   1
  -1   4  17 68.1056 18.0740   4
  -4  -1 -17 72.9930 20.0144   2
  -4  -1 -17 92.6593 20.4782   3
   4  -1  17 58.7391 13.4437   1
  -1   4 -17 60.8295 18.3625   2
   1  -4 -17 74.7489 19.4425   2
  -4  -1  17 67.4719 17.8069   1
   4   1 -17 100.628 21.0046   1
   1   4 -17 69.3065 18.3459   3
  -1   4 -17 63.4518 17.8612   2
   1   4  17 47.3865 16.6082   4
   4  -1 -17 67.8845 20.0623   2
   1   4 -17 55.9572 16.5802   4
  -4  -1 -18 28.0797 14.8191   2
  -1  -4  18 6.39505 9.20872   1
   4   1 -18 3.81526 9.72570   2
   4  -1 -18 3.79316 10.9120   4
   4   1  18 17.7518 11.4772   3
  -1   4  18 10.8062 11.2262   3
   1   4 -18 12.8658 12.2119   1
   1  -4 -18 33.8295 15.9805   2
  -4  -1 -18 18.8766 12.6583   3
   4   1  18 11.4037 10.0974   1
   1  -4 -18 31.7635 14.0356   2
   1  -4 -18 10.3247 11.8613   1
   4   1 -18 16.8410 15.8136   3
   1   4  18 1.68219 9.55188   3
   4  -1 -18 12.8859 13.0409   1
   4   1 -18 10.4144 12.7228   2
   4  -1 -18 7.25130 10.5025   4
   4  -1 -18 2.19836 10.9761   2
  -4  -1 -18 26.4618 16.8365   4
   4  -1  18 37.3361 12.1007   1
   1   4 -18 4.55641 10.6795   3
  -1  -4 -18 13.6668 10.7121   1
  -4   1  18 11.3124 12.4874   3
  -4  -1 -18 6.19151 12.6042   2
  -4  -1 -18 4.70991 7.48056   1
  -1   4 -18 19.6094 16.6689   2
  -1   4  18 4.79094 10.3225   4
   4   1 -18 7.73875 11.3297   1
   1  -4 -18 15.5280 14.8572   4
   1  -4  18 18.9069 11.3210   1
  -1   4 -18 8.53341 12.0735   3
   4   1 -18 20.1015 13.0602   4
  -1   4 -18 10.1917 9.86755   1
  -1  -4 -18 7.55842 10.5545   4
  -4  -1  18-0.71906 8.97330   3
   1  -4 -18 36.6864 18.8260   3
  -1   4 -18 38.3193 18.6750   2
  -1  -4 -18 3.60667 9.19879   2
  -4   1  18 15.4833 11.3711   1
   1   4  18 6.86249 12.1781   1
   4  -1 -18 20.3530 14.4114   2
  -4   1 -18 9.03445 9.21199   1
   1   4 -18 32.4681 16.9944   2
   1   4 -18 5.48822 10.3737   4
  -4   1 -18 17.9083 12.8775   3
   4  -1  18 21.0882 13.7290   3
  -1   4 -18-0.36348 10.6234   4
   4   1  18 38.9323 19.4434   4
  -1  -4 -18 18.3040 15.7559   2
   1   4 -18 28.9031 16.2749   4
  -4   1 -18 19.7989 13.7452   2
  -4   1 -18 40.6193 20.6323   4
  -1   4 -18 27.0716 15.5103   4
  -1   4  18 0.38483 9.32605   1
   1   4 -18 12.1790 12.9664   3
  -4  -1  18 14.2070 10.8641   1
   1   4  18 10.3419 11.0362   4
   4  -1 -18 20.8032 16.3279   3
   4   1 -18 6.69290 12.5749   4
   1   4 -18 26.0198 17.2511   2
  -4   1 -18-0.40113 10.3579   2
  -1  -4 -18 7.80856 14.6065   3
   4  -1 -19 1175.28 73.9679   1
  -4   1  19 1112.65 71.7172   3
   4   1 -19 950.334 66.2373   2
   1  -4 -19 1141.55 75.3476   3
  -1  -4 -19 1094.80 65.7983   1
   4  -1 -19 822.524 60.8721   2
   1   4 -19 870.859 61.9817   3
  -1   4 -19 970.133 66.2683   4
   4  -1 -19 1047.98 69.1504   2
   1  -4 -19 1094.64 66.2677   2
   4  -1 -19 1091.15 72.2365   3
   4   1  19 923.645 67.9575   4
   1   4  19 962.413 71.4610   3
  -4   1 -19 948.766 66.1139   2
   4   1 -19 990.918 68.9308   3
  -1  -4 -19 1121.41 69.3131   2
  -1   4 -19 1086.04 68.3455   3
   4   1 -19 971.656 65.6663   1
   4   1 -19 994.763 67.6164   4
  -1   4 -19 941.219 67.7242   2
  -1   4  19 1056.02 71.7299   1
  -1   4 -19 867.839 59.3971   3
  -4  -1 -19 890.748 67.2385   2
  -1   4 -19 976.943 60.0438   1
   4  -1  19 917.932 52.2847   1
  -1  -4 -19 968.777 66.8327   2
  -4  -1  19 953.058 65.5498   3
  -1  -4 -19 922.478 67.4172   3
   1   4 -19 1063.98 68.7918   3
  -1   4  19 1205.13 78.6830   3
   1   4 -19 937.379 67.8827   2
  -1   4 -19 1100.33 72.1444   2
   1   4  19 1119.97 71.3807   1
   4   1 -19 898.064 65.1698   4
  -4  -1 -19 1013.45 69.4576   4
  -4   1 -19 1002.59 69.8794   4
   1  -4 -19 1199.01 75.0608   4
   1   4 -19 1022.00 63.9840   1
   4  -1 -19 1032.55 67.8971   4
   1  -4  19 886.659 56.4204   1
   1  -4 -19 995.499 66.1528   1
  -4   1 -19 1069.34 68.3299   3
  -1   4 -19 962.399 66.9384   4
   4   1  19 875.468 57.0251   1
  -1   4  19 994.167 67.8148   4
  -4  -1 -19 1038.49 68.2657   3
   1   4 -19 1109.50 71.7043   4
  -4   1 -19 949.039 69.6744   2
   1   4 -19 1075.77 70.5834   4
   4   1 -19 1010.04 69.3868   2
   1  -4 -19 1029.03 66.5040   2
  -1  -4  19 955.716 62.0241   1
  -4   1 -19 861.907 53.1979   1
   4  -1  19 932.712 63.0357   3
   1   4  19 897.218 66.0834   4
  -4  -1 -19 901.133 54.3149   1
  -4   1 -19 1042.93 71.9522   4
   1   4 -19 913.620 67.4018   2
  -4   1  19 972.537 66.2426   1
  -1  -4 -19 1139.63 72.9176   4
   4  -1 -19 933.328 66.1372   4
  -4  -1  19 948.066 65.5158   1
   4   1  19 1058.93 70.9231   3
  -4   1 -20 5.10761 10.7700   1
   1   4 -20 2.92376 10.2735   1
   4  -1  20 9.75448 10.5682   1
  -1  -4 -20 16.2215 15.9144   3
   4  -1 -20 0.44190 12.2970   3
   4  -1 -20 13.8059 15.6935   1
   4  -1 -20 8.86920 14.9247   4
   4   1 -20-0.86848 10.4358   2
  -4   1 -20 18.6027 15.7157   4
   4   1  20 9.45926 13.2314   3
   1  -4 -20 3.64095 13.9463   3
  -1  -4 -20 43.8679 20.8291   2
  -1  -4  20 19.5538 16.9362   1
  -1   4 -20 7.58076 14.4636   3
  -4   1 -20 17.0885 14.9041   2
  -4  -1 -20 1.78661 13.6113   2
  -4  -1 -20 3.50810 9.92319   1
  -1   4  20 5.58072 14.8366   1
  -1   4 -20 1.14732 10.5416   3
  -1  -4 -20 5.95812 16.2999   1
   1  -4 -20 11.6614 13.8747   2
  -1   4 -20 11.4473 13.7379   4
  -4  -1 -20 8.41875 13.1613   2
  -1   4 -20 1.79742 13.9706   2
   4   1 -20 8.49708 12.6385   1
   1   4 -20 9.00816 13.7231   4
  -4  -1 -20 15.0903 13.8320   3
   1  -4  20 22.0779 12.9014   1
   1  -4 -20 1.71498 12.8735   4
   4   1 -20 18.5883 16.9890   4
   1   4  20 13.7858 17.7428   1
   4   1  20 7.28692 16.9418   4
  -4  -1  20 4.61347 12.1758   3
  -4   1 -20 8.56293 15.8280   2
   1   4 -20 7.14756 14.6098   2
   4  -1  20 15.2269 15.1692   3
   1  -4 -20 43.9972 20.6284   1
   1  -4 -20 10.2588 13.3135   2
  -1  -4 -20 11.8226 12.5922   2
  -4   1 -20 0.88875 11.7232   4
  -4   1  20 4.80929 12.7702   3
  -1  -4 -20 14.5463 15.5823   4
   1   4 -20 23.4913 17.1021   2
   1   4 -20 14.1125 16.0611   3
  -1   4 -20 0.84442 10.5510   4
   4   1 -20 9.05388 18.2295   3
  -4   1 -20 8.79519 15.2146   3
   4  -1 -20 9.04635 14.4063   4
   1   4 -20 0.82766 12.4069   3
  -4   1  20 41.7786 21.1578   1
   4   1  20 6.34380 11.3215   1
   1   4 -20 15.2501 13.7448   4
  -4  -1 -20 5.57982 14.8452   4
  -4  -1  20 7.12089 11.9468   1
  -1   4  20 3.25364 15.1985   3
   4  -1 -20-0.83250 9.92048   2
   4  -1 -20 7.71127 14.4770   2
  -1   4 -20 9.93979 13.2400   2
   1   4  20 15.0575 20.1564   3
   1   4  20 8.68300 15.0718   4
   4   1 -20 6.29571 11.2700   4
   4   1 -20 4.23127 11.7319   2
  -1   4  20 4.19287 13.0804   4
   4   1 -21 663.638 60.1777   2
   1   4  21 468.627 49.9097   1
  -4  -1 -21 482.842 51.6193   4
  -4  -1  21 326.487 43.5449   1
   1   4 -21 639.947 59.1388   4
   1   4 -21 632.623 56.6874   3
  -4  -1 -21 613.607 56.3961   2
   4   1  21 471.662 51.8810   3
  -1  -4 -21 608.264 50.9993   1
   1  -4 -21 584.513 57.1414   4
  -1  -4 -21 656.479 58.0714   4
  -4  -1 -21 600.747 58.2404   2
   1   4 -21 706.584 56.3249   1
  -1   4 -21 507.804 52.6040   4
   4   1 -21 481.961 53.3916   4
  -1   4  21 620.954 60.1628   3
  -4  -1 -21 463.675 50.5958   3
  -4   1 -21 615.671 60.7693   4
   1   4 -21 531.431 54.3987   2
   1   4 -21 532.970 54.4427   4
  -4   1  21 610.826 57.3261   3
   4   1 -21 661.805 59.5070   3
  -4   1 -21 383.305 47.9266   4
  -4   1 -21 542.274 45.1169   1
  -1   4 -21 465.430 47.4067   3
  -1  -4 -21 620.449 55.3853   2
   4  -1 -21 580.073 56.0913   3
  -1   4 -21 500.710 51.5208   2
   4  -1  21 533.865 43.6949   1
   4  -1  21 610.953 54.7551   3
   4  -1 -21 550.850 55.7051   4
  -1   4 -21 603.120 52.9743   1
  -4  -1  21 522.395 53.3395   3
  -4   1 -21 683.037 61.0587   2
  -1   4 -21 454.903 52.3792   2
   4  -1 -21 550.210 55.0143   4
   4   1 -21 478.812 50.7236   4
   1   4 -21 546.687 54.4647   3
  -1  -4 -21 482.707 49.8327   2
   1  -4 -21 507.098 55.0961   4
  -1   4 -21 554.201 54.5335   3
  -4   1 -21 575.021 57.9353   2
   4  -1 -21 624.788 55.7171   2
  -4   1  21 493.017 52.1540   1
   1   4  21 530.385 53.3176   4
   1  -4 -21 657.354 56.5076   1
   1  -4 -21 568.506 53.4082   2
   1  -4 -21 641.361 61.4503   3
   1  -4  21 550.240 48.3376   1
  -1  -4 -21 463.934 52.3241   3
  -1   4 -21 571.967 55.4905   4
   4  -1 -21 584.722 55.8886   2
  -1   4  21 641.187 58.8514   1
   1   4 -21 436.044 51.5607   2
  -4  -1 -21 622.842 47.0609   1
   1  -4 -21 599.363 54.1257   2
   4   1  21 550.853 46.6502   1
   4   1 -21 627.633 58.0625   2
  -1  -4  21 492.130 47.6918   1
   4   1 -21 511.780 52.0601   1
   1   4  21 571.399 58.8283   3
   4  -1 -21 690.264 61.6603   1
   1   4 -22 15.7691 15.8970   2
   4  -1  22 1.29405 8.69839   1
   4  -1  22-8.57900 13.0100   3
  -4   1  22 0.48566 13.5543   1
   4   1  22-3.91409 12.9187   3
  -1  -4 -22 5.76920 11.0224   2
  -4   1 -22-8.06492 16.1583   4
  -1   4  22-6.29606 16.6438   3
   1  -4 -22 5.03627 14.0342   3
  -1   4 -22-0.48161 13.1904   2
  -4   1 -22-12.6478 15.9751   4
  -1   4 -22-5.62903 13.3655   3
   1   4 -22 11.5490 16.0450   3
   4  -1 -22-1.42363 13.7818   1
  -1  -4 -22 10.1990 14.4595   3
   1   4 -22 7.20493 11.8045   1
  -4   1 -22-0.91020 13.6064   3
  -1   4 -22-1.75325 12.1885   3
  -1  -4 -22-3.23334 13.4414   2
  -4  -1 -22 0.51710 15.7697   4
  -4  -1  22-11.4544 14.0298   1
  -4  -1 -22 13.1715 17.0783   3
  -1   4 -22 24.1480 15.2955   4
  -1   4 -22-2.36141 12.6611   1
   1  -4  22 8.82226 14.2505   1
  -4   1 -22 11.9598 13.1476   1
   1   4 -22-1.49035 13.9652   4
   4  -1 -22 1.36275 12.0725   2
  -1  -4  22-21.6090 14.5905   1
  -4  -1 -22-12.0625 16.1984   4
   1   4 -22-3.82954 14.2567   3
   1  -4 -22 6.89785 16.4048   4
   1  -4 -22-1.79731 12.9344   2
  -4   1 -22 0.51036 13.5693   2
  -1   4 -22-4.90492 14.9749   4
   4  -1 -22-12.1744 14.8277   4
   1   4  22-6.86005 13.7440   3
  -4   1 -22 5.30079 10.0572   2
  -1   4 -22 2.54552 19.7112   2
   4  -1 -22-15.0378 14.7902   2
   1  -4 -22-6.06630 13.5656   2
  -2  -4   0 7044.13 75.6072   3
  -4  -2   0 6850.17 78.5824   2
  -2  -4   0 6894.46 78.3422   4
   4  -2   0 6566.62 43.4896   3
  -2   4   0 7298.45 69.0873   3
  -2  -4   0 6432.66 72.8144   2
   4  -2   0 7052.40 56.9274   2
   4   2   0 7362.98 59.4097   1
   4   2   0 6909.00 57.8242   1
   2  -4   0 6818.21 73.6266   1
   4  -2   0 6942.85 70.4672   1
  -4   2   0 6944.55 70.6553   1
  -2  -4   0 6993.07 71.4499   1
   2  -4   0 6878.10 67.3952   3
   2   4   0 7046.16 75.8426   3
  -4   2   0 6544.09 52.1698   2
  -2   4   0 6503.78 72.3480   1
  -2   4   0 6956.93 53.3578   4
   4   2   0 7091.71 64.2083   3
  -4   2   0 6818.41 42.3313   3
   2   4   0 6840.64 76.6736   4
  -4  -2   0 7027.69 72.8501   4
   2   4   0 6734.44 71.1319   2
  -2  -4  -1 182.735 11.3439   1
  -2   4   1 185.501 9.46945   4
  -4   2   1 198.824 9.44531   3
  -2   4   1 154.587 11.0123   3
   4   2   1 205.204 9.13710   1
  -4   2  -1 165.852 9.73265   1
   2   4   1 190.098 13.1466   3
  -4   2   1 175.477 8.66860   2
   2   4  -1 220.780 13.3300   3
  -2  -4  -1 183.932 12.5957   2
  -2  -4   1 190.674 12.7067   2
   4   2   1 177.734 8.44313   1
  -2   4  -1 181.736 5.81860   2
  -4  -2  -1 206.581 13.8431   2
   4   2   1 189.482 13.5925   2
  -2   4  -1 169.977 8.21181   4
  -4  -2  -1 175.027 12.3320   4
   2  -4   1 165.819 8.14801   4
   2  -4  -1 189.783 12.3685   3
  -2  -4  -1 192.447 12.9772   3
   4   2  -1 202.198 13.5838   2
   2  -4  -1 198.582 13.6724   1
   2  -4   1 181.791 10.2958   3
   4   2   1 142.617 11.2962   4
   2  -4   1 189.445 11.7444   1
  -4  -2   1 192.434 11.7908   4
  -4   2  -1 158.335 8.72389   2
  -4  -2   1 195.536 13.1813   2
  -2   4  -1 172.229 10.2539   3
  -2  -4   1 211.677 13.3421   4
  -2   4   1 207.472 13.7671   1
  -4  -2  -1 143.897 9.16149   3
   2  -4  -1 200.151 10.1110   4
   4   2   1 200.130 10.9493   3
  -2  -4   1 192.422 12.2865   1
  -2  -4   1 138.997 10.4590   3
   4  -2  -1 163.366 8.96982   2
   4   2  -1 200.463 12.4856   4
  -2  -4  -1 131.724 11.6675   4
   2   4   1 184.090 12.0724   2
   2   4   1 187.006 11.9108   1
   2   4   1 173.528 12.6543   4
   2   4  -1 183.959 11.7490   2
   4  -2  -1 167.180 12.9301   1
   2   4  -1 150.937 10.7352   1
  -4  -2   1 213.809 10.8168   1
   4  -2  -1 190.150 10.4529   3
  -2   4  -1 155.903 10.5531   1
   4   2  -1 191.326 10.5847   3
   4  -2   1 162.378 9.08774   2
   4   2  -1 186.556 10.3847   1
   4  -2  -1 195.359 6.94454   4
   4  -2   1 182.020 9.15746   1
  -4   2   1 171.207 12.3598   1
   2   4  -1 202.695 12.9856   4
  -4  -2   1 174.634 10.0472   3
  -2  -4   2 467.138 19.8959   2
  -2  -4  -2 514.087 22.8087   4
  -4  -2  -2 513.814 17.7723   3
  -4   2  -2 456.464 13.3833   1
  -2  -4  -2 487.113 21.5226   3
  -4  -2   2 470.021 20.9618   2
  -2   4   2 513.063 18.3048   4
   2   4   2 540.380 21.1089   2
   2  -4  -2 505.548 18.5488   4
   2  -4   2 461.427 14.6758   4
  -2   4   2 500.380 23.0226   1
   4  -2   2 491.674 17.5039   2
   4   2  -2 500.061 18.6423   1
  -2   4  -2 504.748 13.7405   2
   2   4  -2 502.978 21.0679   4
  -2  -4   2 480.979 19.9911   3
   4   2   2 492.159 21.2795   4
   2   4   2 468.814 21.6650   3
   4  -2  -2 385.100 21.4405   1
  -4   2   2 472.222 17.6531   3
   2  -4   2 459.244 16.4908   3
   4  -2   2 499.565 12.9412   1
   4   2   2 532.251 22.6030   2
  -4   2  -2 477.995 16.2062   2
  -2   4  -2 507.785 17.1584   3
   4  -2   2 503.532 13.2687   4
   2   4  -2 515.112 20.0502   1
   4  -2  -2 538.846 15.1449   4
  -4  -2  -2 385.002 18.4534   4
   2   4  -2 466.020 19.3640   1
  -4   2   2 491.248 22.1899   1
   2   4   2 439.245 20.8735   4
   2  -4  -2 515.581 23.7184   1
  -2  -4  -2 519.324 21.3690   2
   2   4  -2 486.486 20.1232   2
  -2  -4   2 475.047 20.5978   4
   4   2  -2 484.609 21.2349   2
  -4  -2  -2 403.426 20.0911   2
   2   4   2 426.618 18.6018   1
   4   2  -2 417.763 18.5491   4
  -2   4  -2 479.158 14.7643   4
   2  -4  -2 521.516 22.6738   3
   4   2  -2 529.673 18.9847   3
   4   2   2 452.196 17.9659   3
  -2   4  -2 521.050 15.3088   2
   4   2   2 485.869 13.8312   1
  -4   2  -2 452.703 12.7414   4
  -4   2   2 484.965 15.7761   2
   4  -2  -2 491.109 16.5502   2
   2  -4  -2 481.439 13.3494   2
   2   4  -2 385.266 17.9411   3
  -4  -2  -2 505.387 13.7200   1
  -2   4   2 415.365 19.7852   3
  -4  -2   2 493.484 19.6739   4
   4  -2  -2 489.457 13.7988   4
   2  -4   2 457.331 18.1438   1
  -4  -2   2 411.093 17.0479   1
  -2  -4  -2 435.718 18.4461   1
  -2   4  -2 491.472 18.7840   1
   4  -2  -2 509.336 19.9260   3
  -4  -2   2 495.128 18.4042   3
   4  -2  -3 33.8072 4.98024   2
  -2   4  -3 19.5740 3.49492   3
  -4   2   3 57.0887 8.54748   1
   4   2   3 25.6664 4.96905   3
  -4   2  -3 28.2318 2.96022   3
   2   4  -3 28.0423 5.46810   2
   2  -4  -3 31.6099 4.46378   2
   2  -4   3 33.1927 5.22139   1
   2   4  -3 23.4335 4.57459   4
   4  -2  -3 38.3730 4.82476   4
   4   2  -3 40.3374 5.95414   3
   2   4   3 24.0485 5.70208   4
   2   4   3 26.5626 6.05815   3
   4   2  -3 23.8985 4.39713   4
   4  -2  -3 32.2950 7.47063   1
   2   4   3 26.6849 5.02130   1
  -4   2  -3 29.2173 4.81293   2
  -2   4  -3 31.7038 4.47525   2
  -2   4  -3 35.3483 4.83207   4
  -2  -4  -3 27.2078 5.98153   3
   2  -4  -3 15.1471 3.97916   4
   4   2   3 22.8434 4.85907   2
   4   2   3 34.8653 4.10416   1
   2   4  -3 36.1914 5.74357   1
  -4   2  -3 31.4555 4.97273   4
  -2  -4   3 30.5262 5.34408   2
  -4  -2  -3 31.0842 3.57333   1
  -2   4   3 28.0916 6.67174   1
   4   2  -3 29.4421 5.40385   1
  -2  -4   3 27.5788 5.17540   3
  -4   2  -3 26.5370 2.79749   3
   4  -2  -3 33.5385 4.58169   4
  -2  -4  -3 31.9235 6.07354   4
  -4   2   3 28.9665 5.00092   3
   2   4   3 29.3326 5.14859   2
   2   4  -3 39.9666 6.54457   3
   2  -4  -3 42.7200 7.86688   1
  -4  -2  -3 31.3913 4.92979   3
   2  -4  -3 29.1639 6.07766   3
   4   2  -3 31.4904 4.98357   3
   2  -4  -3 25.5955 3.89171   2
  -4  -2   3 33.0047 6.16805   2
   4  -2   3 27.9787 3.94916   4
  -2   4   3 41.1866 6.86281   3
   2  -4   3 36.0002 4.80021   3
  -4   2   3 25.8690 4.30957   2
  -2  -4   3 30.0199 5.42305   4
   4   2  -3 30.4837 5.79202   2
   4  -2   3 28.2920 5.10328   2
  -2   4  -3 25.6327 4.56859   1
  -2   4   3 25.1353 5.19328   4
  -2  -4  -3 30.0160 5.47640   2
   4  -2  -3 28.9207 5.20623   3
  -2  -4  -3 34.1856 5.51509   1
  -4  -2  -3 34.8517 6.13120   4
   2  -4   3 39.2831 4.85280   4
   2   4  -3 26.2861 4.92764   1
  -2   4  -3 27.4681 4.55996   2
   4   2   3 30.1994 6.01551   4
  -4  -2  -3 22.2796 4.68711   2
  -4  -2   3 26.6051 4.76320   4
  -4  -2   3 38.8895 5.95649   1
  -4   2  -3 27.2085 3.02003   1
  -4   2  -4 4788.06 39.4040   1
  -2   4  -4 5506.45 64.1555   4
   2   4  -4 5270.71 73.3428   4
   2   4  -4 5494.34 73.3410   3
   4  -2   4 5112.36 45.5289   3
  -2  -4   4 5702.71 72.6648   1
   4  -2   4 5427.44 73.4285   2
  -2   4  -4 5570.88 63.9078   3
  -2   4   4 4984.86 87.4523   1
   4   2  -4 5505.62 70.9104   3
   4  -2  -4 4658.22 64.3235   2
  -4  -2  -4 5251.95 77.3517   2
   2  -4  -4 5360.84 65.6845   2
  -2  -4  -4 5124.47 81.8374   4
   2   4   4 5245.80 83.2840   3
  -4   2   4 5059.78 71.4889   3
  -2  -4  -4 4994.11 80.2079   3
   2   4   4 4942.51 79.2370   4
   4   2   4 5149.49 76.8664   3
   4   2   4 5033.96 58.2088   1
  -4   2  -4 5217.57 52.0007   3
   4  -2  -4 5299.58 77.1701   3
   4  -2   4 5189.04 61.5005   4
  -2   4  -4 4734.78 59.1117   4
  -4   2  -4 5333.45 43.3620   1
  -4  -2  -4 5128.76 68.1594   3
  -2   4  -4 4624.40 58.0411   1
  -4  -2  -4 5248.39 48.5625   1
  -4   2  -4 5177.37 65.8491   2
  -2   4   4 4951.87 70.5036   4
  -2   4  -4 5116.47 63.7606   2
  -2  -4   4 5239.12 71.7633   3
  -2   4   4 5411.52 86.9214   3
  -2  -4   4 4793.45 71.4681   2
   2   4  -4 5241.78 70.4533   1
   4  -2  -4 4939.39 63.0414   4
  -2   4  -4 4761.74 58.8651   3
   4   2  -4 4599.20 66.7140   1
   4   2  -4 5914.33 76.3593   4
  -4   2  -4 4918.55 64.7608   4
  -2  -4  -4 5241.02 75.4729   2
  -2  -4   4 5055.32 71.8590   4
  -2   4  -4 5331.46 64.5283   1
   4   2   4 4600.66 76.5314   4
   2   4   4 5539.30 74.9148   2
  -2  -4  -4 5289.89 71.1067   1
   2   4   4 5379.76 75.2196   1
  -4   2   4 5340.91 84.5631   1
  -4  -2   4 5264.38 71.1938   4
  -4  -2   4 5401.86 76.4224   2
   4   2  -4 5024.80 69.2751   3
   4  -2  -4 5492.96 66.9799   4
   2  -4  -4 5081.78 74.0560   4
   4   2  -4 5208.82 76.4251   2
  -2   4  -4 5113.69 67.7202   2
  -4   2   5 16.4161 4.87393   2
   4   2  -5 4.23202 2.93929   4
   2   4  -5 4.06873 3.15272   4
   4  -2  -5 9.31021 3.39281   4
   4   2  -5 16.5118 6.33776   2
  -4  -2  -5 7.17915 4.24725   2
   2  -4  -5 9.79095 3.11484   3
   2   4   5 12.8210 4.64241   1
   2   4  -5 13.8472 4.64392   3
  -4  -2   5-0.29506 2.31662   1
  -2   4  -5 18.9931 4.81128   1
  -2  -4  -5 9.90056 3.83912   3
   2  -4  -5 13.0113 4.92657   4
   4  -2  -5 19.0769 4.76972   2
   2   4  -5 11.4190 3.84686   1
   4   2   5 9.92088 5.21207   3
   2   4   5 5.50959 3.76774   3
  -4   2   5 6.49171 5.52561   1
  -2  -4   5 9.20272 4.35349   4
  -4   2   5 2.71458 1.88436   3
  -4  -2   5 7.91745 3.75454   4
  -2   4  -5 13.0062 3.97449   4
  -2   4  -5 5.68922 2.46302   1
   4   2   5 13.2902 5.18505   4
  -4   2  -5 11.6510 3.44461   4
   4  -2   5 7.12869 2.84716   4
  -4  -2  -5 8.34409 3.70123   4
   4   2  -5 13.9258 4.37989   3
  -2   4   5 4.47578 3.60659   3
  -4  -2  -5 10.9478 4.67737   3
   4  -2   5 13.1006 4.52715   2
   2  -4  -5 11.6964 3.56257   2
   2  -4  -5 5.88897 3.84965   1
  -4  -2   5 9.94531 3.10402   2
  -4   2  -5 10.3139 2.31163   1
  -2  -4  -5 19.2223 5.40668   1
   4  -2   5 13.2525 3.18226   3
  -2   4  -5 16.3353 4.25919   3
   2  -4  -5 9.81514 3.91189   2
   2   4   5 16.4960 5.75465   4
   4   2   5 11.3628 3.72166   1
   2   4   5 8.85296 3.75527   2
  -4  -2  -5 13.1785 2.66484   1
  -4   2  -5 13.7383 2.24283   1
  -2   4  -5 11.7306 3.78374   2
  -2  -4  -5 14.0269 5.26702   2
  -2  -4  -5 7.54710 2.26147   4
   4  -2  -5 6.80181 4.18287   3
  -2   4   5 9.37378 3.56156   4
  -4   2  -5 18.2172 5.20604   2
   4  -2  -5 4.45983 4.12111   1
  -2   4   5 26.1098 8.71163   1
  -4   2   5 13.0695 3.85711   4
  -2   4  -5 11.8330 3.41532   3
   4   2  -5 14.9643 4.07104   3
  -2  -4   5 17.2794 4.82900   1
  -2   4  -5 10.0179 3.29807   2
  -4   2  -5 9.11775 2.80894   3
   4   2   5 5.88020 3.07722   2
   4   2  -5 8.39600 3.14353   1
   2   4  -5 10.4010 3.68324   2
  -2  -4   5 12.8076 4.76111   2
  -2   4  -5 11.1217 3.65648   4
   2   4  -5 21.4197 4.87155   3
   4  -2   6 1188.21 41.1385   2
   4   2   6 1148.78 44.7265   4
   4  -2  -6 1187.60 42.4279   3
  -2   4  -6 1001.84 33.3437   4
   4   2  -6 1046.08 36.2780   3
  -4   2  -6 1146.84 37.4370   4
   2   4   6 1115.89 45.0628   3
   2  -4  -6 1035.54 35.6552   2
  -4  -2  -6 1038.34 28.2205   1
   2   4  -6 956.071 35.5691   4
   2   4   6 1051.47 37.8269   2
  -2   4  -6 1127.16 32.9383   3
  -2  -4   6 1116.54 39.4352   2
   4   2   6 951.281 30.1161   1
  -4   2   6 1206.38 41.2186   3
  -4   2  -6 1147.63 25.1092   1
  -4  -2  -6 1212.82 41.6839   2
   2   4  -6 874.547 33.7349   3
  -2   4  -6 1125.01 37.0870   2
   4  -2  -6 1095.87 36.0981   4
  -2  -4  -6 1062.37 41.9484   4
   4   2  -6 927.341 36.4958   2
   2  -4  -6 1142.97 45.8467   3
   4   2  -6 1064.73 37.2131   4
  -2   4  -6 1101.53 33.6112   3
   2  -4  -6 1160.67 40.9586   4
   4  -2  -6 1210.16 46.6961   1
  -4   2  -6 901.917 28.5437   3
  -4   2  -6 1181.97 25.1447   1
  -2  -4  -6 1165.02 38.6442   1
  -4  -2   6 1066.42 36.9803   4
  -4  -2  -6 992.695 39.4940   4
  -2   4  -6 1130.82 35.6353   4
  -4   2   6 1160.65 36.3791   4
   4   2   6 1102.72 41.4704   3
   2  -4  -6 1299.74 48.5093   1
  -2  -4   6 1092.80 37.8144   4
  -4   2  -6 1028.83 35.6640   2
  -2   4   6 1208.15 41.0728   4
  -4  -2   6 1058.17 38.4159   2
  -2   4   6 1207.88 46.0562   3
  -2  -4  -6 1089.20 42.6806   3
   2   4  -6 1172.75 36.8428   1
  -2   4  -6 1180.73 33.1245   1
  -2  -4   6 1254.44 38.3590   1
   2   4   6 1240.62 46.2451   4
   2   4   6 1073.13 40.7711   1
  -2   4  -6 860.131 27.7896   1
  -2   4  -6 1186.24 40.0103   2
  -2  -4  -6 939.792 36.5506   2
   2  -4  -6 935.536 33.1919   2
  -4  -2   6 1027.01 35.7800   3
  -4   2   6 1147.68 37.2245   2
   4  -2   6 1091.32 29.6999   3
   4  -2  -6 1092.17 37.5106   2
   4  -2   6 1112.59 35.7321   4
  -4   2   6 1174.14 44.9402   1
  -2   4   6 1196.02 47.9078   1
  -4  -2   6 1208.26 39.9332   1
   2   4  -6 1071.05 38.0191   2
   4   2  -6 1073.34 37.4315   1
   2   4  -6 1254.95 39.4587   3
  -4  -2  -6 1216.42 39.9923   3
   4   2   6 1015.87 38.4095   2
   4   2   7 212.398 15.1478   1
  -4   2  -7 171.006 13.6386   3
   2   4   7 197.827 20.1506   3
   2   4   7 245.430 19.5750   2
  -2   4  -7 145.684 12.0542   1
  -2   4   7 237.751 19.4104   4
  -4  -2  -7 198.620 17.5714   3
   4  -2  -7 181.996 17.4921   3
  -2  -4  -7 236.813 18.2132   1
  -2   4  -7 231.363 17.3681   4
  -4   2   7 204.422 16.9767   2
   2   4   7 178.088 18.4548   4
  -4   2  -7 177.127 11.4575   1
  -2  -4  -7 183.497 18.9659   4
  -4  -2  -7 180.704 17.0626   2
  -2   4  -7 216.476 17.5557   2
  -2  -4   7 198.847 16.4415   1
   4   2  -7 207.630 17.3938   3
  -4  -2  -7 184.635 13.1648   1
   2  -4  -7 196.707 16.4087   2
  -2  -4   7 192.833 17.2265   2
   2  -4  -7 171.857 16.8465   4
   4  -2   7 203.888 14.3194   3
  -2   4   7 234.722 22.1014   1
   4   2  -7 177.183 15.9986   4
   4  -2  -7 246.929 22.0628   1
   2   4  -7 210.644 17.4376   4
   2  -4  -7 173.753 16.2964   2
   4   2  -7 218.549 18.7342   2
  -2   4  -7 235.888 19.6166   2
   2   4   7 214.458 19.5117   1
   2  -4  -7 202.919 20.3645   3
   4  -2   7 175.884 17.3229   2
   4  -2   7 208.355 16.6077   4
   2   4  -7 181.371 16.9667   2
   4   2   7 252.186 21.6802   4
  -4  -2   7 208.941 18.0205   2
  -4   2  -7 216.068 18.0002   4
  -4   2   7 248.800 21.8532   1
  -4   2  -7 176.914 16.5254   2
   2   4  -7 167.872 15.6200   3
   2   4  -7 201.177 17.1072   3
  -2   4  -7 191.164 15.1694   3
  -4  -2   7 207.649 17.7449   1
   4  -2  -7 190.108 16.4896   4
   4   2  -7 169.913 15.9571   4
  -4   2   7 176.189 15.4175   4
  -2   4  -7 177.646 14.3455   3
  -2  -4  -7 128.090 14.4289   2
  -2  -4   7 214.827 17.7164   4
  -2  -4  -7 204.657 19.7058   3
   4   2  -7 181.019 16.4754   1
  -4  -2   7 178.349 16.0479   3
   4   2   7 215.570 18.7827   2
   4  -2  -7 216.032 18.0479   2
  -4  -2  -7 191.707 18.4514   4
   2  -4  -7 222.728 21.0539   1
   4  -2   7 167.998 10.4366   1
  -2   4   7 179.410 18.7828   3
  -2   4  -7 189.056 15.7242   4
  -4   2   7 210.843 18.2948   3
   4   2   7 191.108 18.3416   3
   2   4  -7 173.598 15.2947   1
  -4   2  -8 2852.10 68.8294   4
  -4  -2  -8 2979.35 57.5258   1
   4   2   8 2946.79 75.3939   3
  -4   2   8 3158.57 81.9276   1
   2   4  -8 2983.41 69.7048   4
  -4  -2  -8 2858.63 72.4811   2
   4   2   8 2917.74 78.6010   4
   2  -4  -8 2751.09 78.0748   1
   4  -2   8 2901.34 66.9961   4
   4  -2  -8 3133.97 78.1760   3
   4  -2   8 2858.21 73.0324   2
  -4   2   8 2982.66 69.1720   2
  -2   4  -8 2855.53 66.9083   4
   2   4   8 2489.10 74.8360   3
   4   2  -8 2977.27 73.8559   2
  -2   4  -8 3180.79 66.0555   3
  -4   2  -8 3053.12 71.5164   2
   2   4  -8 3015.79 68.6786   3
  -2  -4   8 3085.31 67.3936   1
   2   4  -8 3182.00 72.0579   3
  -4  -2  -8 2967.32 75.6451   4
  -2   4  -8 2860.52 69.7122   2
  -2  -4  -8 2466.57 71.1109   3
  -2  -4  -8 3314.15 72.2911   1
  -2   4  -8 2851.12 72.2825   2
   2  -4   8 2377.88 51.9790   1
   4   2  -8 2672.53 65.9260   3
   4  -2   8 2900.31 47.1546   1
   2   4  -8 2906.88 70.0107   4
   4   2   8 2988.79 60.5408   1
   4   2  -8 2664.89 66.2267   1
  -4  -2  -8 2671.86 68.7950   3
  -2  -4   8 2983.89 73.1241   2
  -4   2   8 2533.65 63.4556   4
  -2   4  -8 2481.40 52.9909   1
   2  -4  -8 3159.33 83.2304   3
  -4  -2   8 2831.85 70.6923   2
  -4  -2   8 2996.63 71.3923   1
   4  -2  -8 3129.75 81.6218   1
  -2   4  -8 2451.28 58.0128   3
  -4   2  -8 2848.00 60.4705   3
  -4   2  -8 2487.93 48.0397   1
  -2  -4  -8 2971.28 72.3919   2
[truncated: 4,181,245 more chars]
